# Supplementary material
Source: PubMed Central journal article supplement (PMC3867192)
Supplement: NIHMS54762-supplement-1.pdf [file NIHMS54762-supplement-1.pdf]

**Variants at multiple loci implicated in both innate and adaptive immune responses are associated with Sjögren's syndrome**

**SUPPLEMENTARY NOTE, FIGURES, AND TABLES**

Christopher J. Lessard, He Li, Indra Adrianto, John A. Ice, Astrid Rasmussen, Kiely M. Grundahl, Jennifer A. Kelly, Mikhail G. Dozmorov, Corinne Miceli-Richard, Simon Bowman, Sue Lester, Per Eriksson, Maija-Leena Eloranta, Johan G. Brun, Lasse G. Gøransson, Erna Harboe, Joel M. Guthridge, Kenneth M. Kaufman, Marika Kvarnström, Helmi Jazebi, Deborah S. Cunninghame Graham, Martha E. Grandits, Abu N. M. Nazmul-Hossain, Ketan Patel, Adam J. Adler, Jacen S. Maier-Moore, A. Darise Farris, Michael T. Brennan, James A. Lessard, James Chodosh, Rajaram Gopalakrishnan, Kimberly S. Hefner, Glen D. Houston, Andrew J.W. Huang, Pamela J. Hughes, David M. Lewis, Lida Radfar, Michael D. Rohrer, Donald U. Stone, Jonathan D. Wren, Timothy J. Vyse, Patrick M. Gaffney, Judith A. James, Roald Omdal, Marie Wahren-Herlenius, Gabor G. Illei, Torsten Witte, Roland Jonsson, Maureen Rischmueller, Lars Rönblom, Gunnel Nordmark, Wan-Fai Ng for UK Primary Sjögren's Syndrome Registry, Xavier Mariette, Juan-Manuel Anaya, Nelson L. Rhodus, Barbara M. Segal, R. Hal Scofield, Courtney G. Montgomery, John B. Harley, and Kathy L. Moser Sivils

Corresponding Author:

Kathy L. Moser Sivils

Arthritis and Clinical Immunology Research Program

Oklahoma Medical Research Foundation

825 N.E. 13th Street, MS57

Oklahoma City, Oklahoma 73104

E-mail: [sivilsk@omrf.org](mailto:sivilsk@omrf.org)

Phone: +1 (405) 271-2534

Fax: +1 (405) 271-2578

## TABLE OF CONTENTS:

Page#

4 Supplementary Note

### SUPPLEMENTARY FIGURES:

- 6 Supplementary Figure 1: Summary of the study design and imputation strategy.
- 7 Supplementary Figure 2: Summary of genome-wide association results.
- 8 Supplementary Figure 3: Expanded view of the HLA region.
- 9 Supplementary Figure 4: Quantile-quantile plot of Dataset 1.
- 10 Supplementary Figure 5: Results of logistic regression analysis after adjusting for top effects, linkage disequilibrium, and haplotypes present in the HLA region.
- 11 Supplementary Figure 6: Association of HLA classical alleles with Sjögren's syndrome.
- 12 Supplementary Figure 7: Sjögren's syndrome-associated variants in the HLA region within 100bp of RFX5 binding site were correlated with the expression of HLA genes.
- 13 Supplementary Figure 8: Expanded view of the *IRF5-TNPO3* region.
- 14 Supplementary Figure 9: Results of logistic regression analysis after adjusting for top effects, linkage disequilibrium, and haplotypes present in the *IRF5-TNPO3* region.
- 15 Supplementary Figure 10: Genomic features from data tracks in the UCSC Genome Browser in the region around *IRF5-TNPO3*.
- 17 Supplementary Figure 11: Expanded view of the *STAT1-STAT4* region.
- 18 Supplementary Figure 12: Results of logistic regression analysis after adjusting for top effects, linkage disequilibrium, and haplotypes present in the *STAT1-STAT4* region.
- 19 Supplementary Figure 13: Genomic features from data tracks in the UCSC Genome Browser in the region around *STAT1-STAT4*.
- 21 Supplementary Figure 14: Expanded view of the *IL12A* region.
- 22 Supplementary Figure 15: Results of logistic regression analysis after adjusting for top effects, linkage disequilibrium, and haplotypes present in the *IL12A* region.
- 23 Supplementary Figure 16: Genomic features from data tracks in the UCSC Genome Browser in the region around *IL12A*.
- 25 Supplementary Figure 17: Expanded view of the *FAM167A-BLK* region.
- 26 Supplementary Figure 18: Results of logistic regression analysis after adjusting for top effects, linkage disequilibrium, and haplotypes present in the *FAM167A-BLK* region.
- 27 Supplementary Figure 19: Genomic features from data tracks in the UCSC Genome Browser in the region around *FAM167A-BLK*.
- 29 Supplementary Figure 20: Expanded view of the *DDX6-CXCR5* region.
- 30 Supplementary Figure 21: Results of logistic regression analysis after adjusting for top effects, linkage disequilibrium, and haplotypes present in the *CXCR5* region.
- 31 Supplementary Figure 22: Genomic features from data tracks in the UCSC Genome Browser in the region around *CXCR5*.
- 33 Supplementary Figure 23: Expanded view of the *TNIP1* region.

- 34 Supplementary Figure 24: Results of logistic regression analysis after adjusting for top effects, linkage disequilibrium, and haplotypes present in the *TNIP1* region.
- 35 Supplementary Figure 25: Genomic features from data tracks in the UCSC Genome Browser in the region around *TNIP1*.
- 37 Supplementary Figure 26: Indirect protein-protein interaction network created in DAPPLE using non-HLA variants achieving genome-wide significance.
- 38 Supplementary Figure 27: Direct protein-protein interaction network created in DAPPLE using non-HLA variants demonstrating genome-wide or suggestive association.
- 39 Supplementary Figure 28: Indirect protein-protein interaction network created in DAPPLE using non-HLA variants demonstrating genome-wide or suggestive association.
- 40 Supplementary Figure 29: Forest plot of odds ratios for significantly associated loci within the HLA in Sjögren's syndrome and various autoimmune disorders.
- 41 Supplementary Figure 30: Forest plot of odds ratios for significantly associated loci outside of the HLA in Sjögren's syndrome and various autoimmune disorders.
- 42 Supplementary Figure 31: Plots of PC2 vs. PC1 from the principle component analyses (PCA) for Dataset 1 and Dataset 2.

### SUPPLEMENTARY TABLES:

**Note:** Supplementary Table 3 was abbreviated to 5 pages in the interest of space, but the authors are pleased to provide this additional data upon request.

- 43 Supplementary Table 1: Sjögren's syndrome loci previously implicated in candidate gene studies and established in the current study.
- 44 Supplementary Table 2: Summary of study samples contributed by each site.
- 45 Supplementary Table 3: Association analysis in HLA.
- 50 Supplementary Table 4: Association of HLA classical alleles with Sjögren's syndrome.
- 51 Supplementary Table 5: MHC-RFX5 hypergeometric analysis for enrichment in DS1
- 52 Supplementary Table 6: Results from *cis*-eQTL analyses in Sjögren's syndrome-associated regions.
- 53 Supplementary Table 7: Association analysis in *IRF5*.
- 60 Supplementary Table 8: Association analysis in *STAT4*.
- 62 Supplementary Table 9: Association analysis in *IL12A*.
- 65 Supplementary Table 10: Association analysis in *BLK*.
- 75 Supplementary Table 11: Association analysis in *CXCR5*.
- 83 Supplementary Table 12: Association analysis in *TNIP1*.
- 87 Supplementary Table 13: Suggestive regions from analysis using Dataset 4.
- 88 Supplementary Table 14: Multiple logistic regression model of genome-wide and suggestive association SNPs to Sjögren's syndrome risk.
- 89 Supplementary Table 15: Table of odds ratios for significantly associated loci outside the HLA in Sjögren's syndrome and various autoimmune disorders.
- 90 Supplementary Table 16: Table of odds ratios for significantly associated loci within the HLA in Sjögren's syndrome and various autoimmune disorders.

## Supplementary Note:

### The UK Primary Sjögren's Syndrome Registry is composed of the following members:

Wan-Fai Ng<sup>1</sup>, Simon J. Bowman<sup>2</sup>, Bridget Griffiths<sup>3</sup>, Frances Hall<sup>4</sup>, Elaline C. Bacabac<sup>5</sup>, Robert Moots<sup>5</sup>, Kuntal Chadravarty<sup>6</sup>, Shamin Lamabadusuriya<sup>6</sup>, Michele Bombardieri<sup>7</sup>, Constantino Pitzalis<sup>7</sup>, Nurhan Sutcliffe<sup>7</sup>, Nagui Gendi<sup>8</sup>, Rashidat Adeniba<sup>8</sup>, John Hamburger<sup>9</sup>, Andrea Richards<sup>9</sup>, Saaeha Rauz<sup>10</sup>, Sue Brailsford<sup>1</sup>, Joanne Logan<sup>11</sup>, Diamuid Mulherin<sup>11</sup>, Paul Emery<sup>12</sup>, Alison McManus<sup>12</sup>, Colin Pease<sup>12</sup>, Alison Booth<sup>13</sup>, Marian Regan<sup>13</sup>, Theodoros Dimitroulas<sup>14</sup>, Lucy Kadiki<sup>14</sup>, Daljit Kaur<sup>14</sup>, George Kitas<sup>14</sup>, Mark Lloyd<sup>15</sup>, Lisa Moore<sup>15</sup>, Esther Gordon<sup>16</sup>, Cathy Lawson<sup>16</sup>, Monica Gupta<sup>17</sup>, John Hunter<sup>17</sup>, Lesley Stirton<sup>17</sup>, Gill Ortiz<sup>18</sup>, Elizabeth Price<sup>18</sup>, Gavin Clunie<sup>19</sup>, Ginny Rose<sup>19</sup>, Sue Cuckow<sup>19</sup>, Susan Knight<sup>20</sup>, Deborah Symmons<sup>20</sup>, Beverley Jones<sup>20</sup>, Shereen Al-Ali<sup>1</sup>, Andrew Carr<sup>1</sup>, Katherine Collins<sup>1</sup>, Andini Natasari<sup>1</sup>, Philip Stocks<sup>1</sup>, Jessica Tarn<sup>1</sup>, Ian Corbett<sup>3</sup>, Christine Downie<sup>3</sup>, Suzanne Edgar<sup>3</sup>, Marco Carrozzo<sup>3</sup>, Francisco Figuereido<sup>3</sup>, Heather Foggo<sup>3</sup>, Dennis Lendrem<sup>3</sup>, Iain Macleod<sup>3</sup>, Philip Mawson<sup>3</sup>, Sheryl Mitchell<sup>3</sup>, Adrian Jones<sup>21</sup>, Peter Lanyon<sup>21</sup>, Alice Muir<sup>21</sup>, Paula White<sup>22</sup>, Steven Young-Min<sup>22</sup>, Susan Pugmire<sup>23</sup>, Saravanan Vadivelu<sup>23</sup>, Annie Cooper<sup>24</sup>, Marianne Watkins<sup>24</sup>, Anne Field<sup>25</sup>, Stephen Kaye<sup>25</sup>, Devesh Mewar<sup>25</sup>, Patricia Medcalf<sup>25</sup>, Pamela Tomlinson<sup>25</sup>, Debbie Whiteside<sup>25</sup>, Neil McHugh<sup>26</sup>, John Pauling<sup>26</sup>, Julie James<sup>26</sup>, Nike Olaitan<sup>26</sup>, Mohammed Akil<sup>27</sup>, Jayne McDermott<sup>27</sup>, Olivia Godia<sup>27</sup>, David Coady<sup>28</sup>, Elizabeth Kidd<sup>28</sup>, Lynne Palmer<sup>28</sup>, Bhaskar Dasgupta<sup>29</sup>, Victoria Katsande<sup>29</sup>, Pamela Long<sup>29</sup>, Charles Li<sup>30</sup>, Usha Chandra<sup>31</sup>, Kirsten MacKay<sup>31</sup>, Stefano Fedele<sup>32</sup>, Ada Ferenkey-Koroma<sup>32</sup>, Ian Giles<sup>32</sup>, David Isenberg<sup>32</sup>, Helena Maconnell<sup>32</sup>, Stephen Porter<sup>32</sup>, Paul Allcoat<sup>33</sup>, John McLaren<sup>33</sup>

<sup>1</sup>Newcastle University, Newcastle upon Tyne, UK; <sup>2</sup>University Hospital Birmingham, Birmingham, UK; <sup>3</sup>Newcastle upon Tyne Hospitals NHS Foundation Trust, Newcastle upon Tyne, UK; <sup>4</sup>Addenbrooke's Hospital, Cambridge, UK; <sup>5</sup>Aintree University Hospitals, Liverpool, UK; <sup>6</sup>Barking, Havering and Redbridge NHS Trust, Barking, UK; <sup>7</sup>Bart and the London NHS Trust, London, UK; <sup>8</sup>Basildon Hospital, Basildon, UK; <sup>9</sup>Birmingham Dental Hospital, Birmingham, UK; <sup>10</sup>Birmingham & Midland Eye Centre, Birmingham, UK; <sup>11</sup>Cannock Chase Hospital, Cannock, UK; <sup>12</sup>Chapel Allerton Hospital, Leeds, Leeds, UK; <sup>13</sup>Derbyshire Royal Infirmary, Derby, UK; <sup>14</sup>Dudley Group of Hospitals NHS Foundation Trust, Dudley, UK; <sup>15</sup>Frimley Park Hospital, Frimley Park, UK; <sup>16</sup>Harrogate District Foundation Trust Hospital, Harrogate, UK; <sup>17</sup>Gartnavel General Hospital, Glasgow, UK; <sup>18</sup>Great Western Hospital, Swindon, UK; <sup>19</sup>Ipswich Hospital NHS Trust, Ipswich, UK; <sup>20</sup>Macclesfield District General Hospital & Arthritis Research UK Epidemiology Unit, Manchester, Manchester, UK; <sup>21</sup>Nottingham University Hospital, Nottingham, UK; <sup>22</sup>Portsmouth Hospitals NHS Trust, Portsmouth, UK; <sup>23</sup>Queen's Elizabeth Hospital, Gateshead, Gateshead, UK; <sup>24</sup>Royal Hampshire County Hospital, Winchester, UK; <sup>25</sup>Royal Liverpool University Hospital, Liverpool, UK; <sup>26</sup>Royal National Hospital for Rheumatic Diseases, Bath, UK; <sup>27</sup>Sheffield Teaching Hospitals NHS Trust, Sheffield, UK; <sup>28</sup>Sunderland Royal Hospital, Sunderland, UK; <sup>29</sup>Southend University Hospital, Southend, UK; <sup>30</sup>Royal Surrey Hospital, Guildford, UK; <sup>31</sup>Torbay Hospital, Torbay, UK; <sup>32</sup>University College Hospital & Eastman Dental Institute, London, UK; <sup>33</sup>Whyteman's Brae Hospital, Kirkcaldy, Fife, UK.

### Genes and Blood Clotting Study dataset(s):

Funding support for the Genes and Blood Clotting Study was provided through the NIH/NHLBI ( R37HL039693). The Genes and Blood Clotting Study is one of the Phase 3 studies as part of the Gene Environment Association Studies (GENEVA) under GEI. Assistance with genotype cleaning was provided by the GENEVA Coordinating Center (U01 HG004446). Funding support for DNA extraction and genotyping, which was performed at the Broad Institute, was provided by NIH/NHLBI ( R37HL039693). Additional support was provided by the Howard Hughes Medical Institute. The datasets used for the analyses described in this manuscript were obtained from dbGaP at <http://www.ncbi.nlm.nih.gov/sites/entrez?db=gap> through dbGaP accession number [phs000304.v1.p1].

## Supplementary Note (Continued)

### **GWAS of Ischemic Stroke dataset(s):**

Funding support for the GWAS of Ischemic Stroke study was provided through the NIH Genes, Environment and Health Initiative [GEI] (U01HG004436). The GWAS of Ischemic Stroke study is one of the genome-wide association studies funded as part of the Gene Environment Association Studies (GENEVA) under GEI. Assistance with phenotype harmonization and genotype cleaning, as well as with general study coordination, was provided by the GENEVA Coordinating Center (U01 HG004446). Assistance with data cleaning was provided by the National Center for Biotechnology Information. Funding support for genotyping, which was performed at the Johns Hopkins University Center for Inherited Disease Research, was provided by the NIH GEI (U01HG004438) and the NIH contract "High throughput genotyping for studying the genetic contributions to human disease"(HHSN268200782096C). Field work for this project was supported by a Cooperative Agreement with the Division of Adult and Community Health, Centers for Disease Control and Prevention; the National Institute of Neurological Disorders and Stroke (NINDS) and the NIH Office of Research on Women's Health (ORWH) (Grant R01 NS45012); Office of Research and Development, Medical Research Service, Department of Veterans Affairs; and the University of Maryland General Clinical Research Center (Grant M01 RR 165001), National Center for Research Resources, NIH. This study used samples from the NINDS Human Genetics Resource Center DNA and Cell Line Repository (<http://ccr.coriell.org/ninds>). The datasets used for the analyses described in this manuscript were obtained from dbGaP at <http://www.ncbi.nlm.nih.gov/sites/entrez?db=gap> through dbGaP accession number [phs000292.v1.p1].

### **CIDR:NGRC Parkinson's disease study dataset(s):**

This work utilized in part data from the NINDS DbGaP database from the CIDR:NGRC PARKINSON'S DISEASE STUDY. Funding support for this study was provided through the the National Institute of Neurological Disorders and Stroke, National Institutes of Health (5R01NS036960-10). Funding source for genotyping was provided through the National Institutes of Health (HHSN268200782096C). The datasets used for the analyses described in this manuscript were obtained from dbGaP at <http://www.ncbi.nlm.nih.gov/sites/entrez?db=gap> through dbGaP accession number [phs000196.v2.p1].

### **High Density SNP Association Analysis of Melanoma: Case-Control and Outcomes Investigation dataset(s):**

Research support to collect data and develop an application to support this project was provided by 3P50CA093459, 5P50CA097007, 5R01ES011740, and 5R01CA133996. Funding source for genotyping was provided through the National Institutes of Health (HHSN268200782096C). The datasets used for the analyses described in this manuscript were obtained from dbGaP at <http://www.ncbi.nlm.nih.gov/sites/entrez?db=gap> through dbGaP accession number [phs000187.v1.p].

## Supplementary Figure 1: Summary of the study design and imputation strategy.

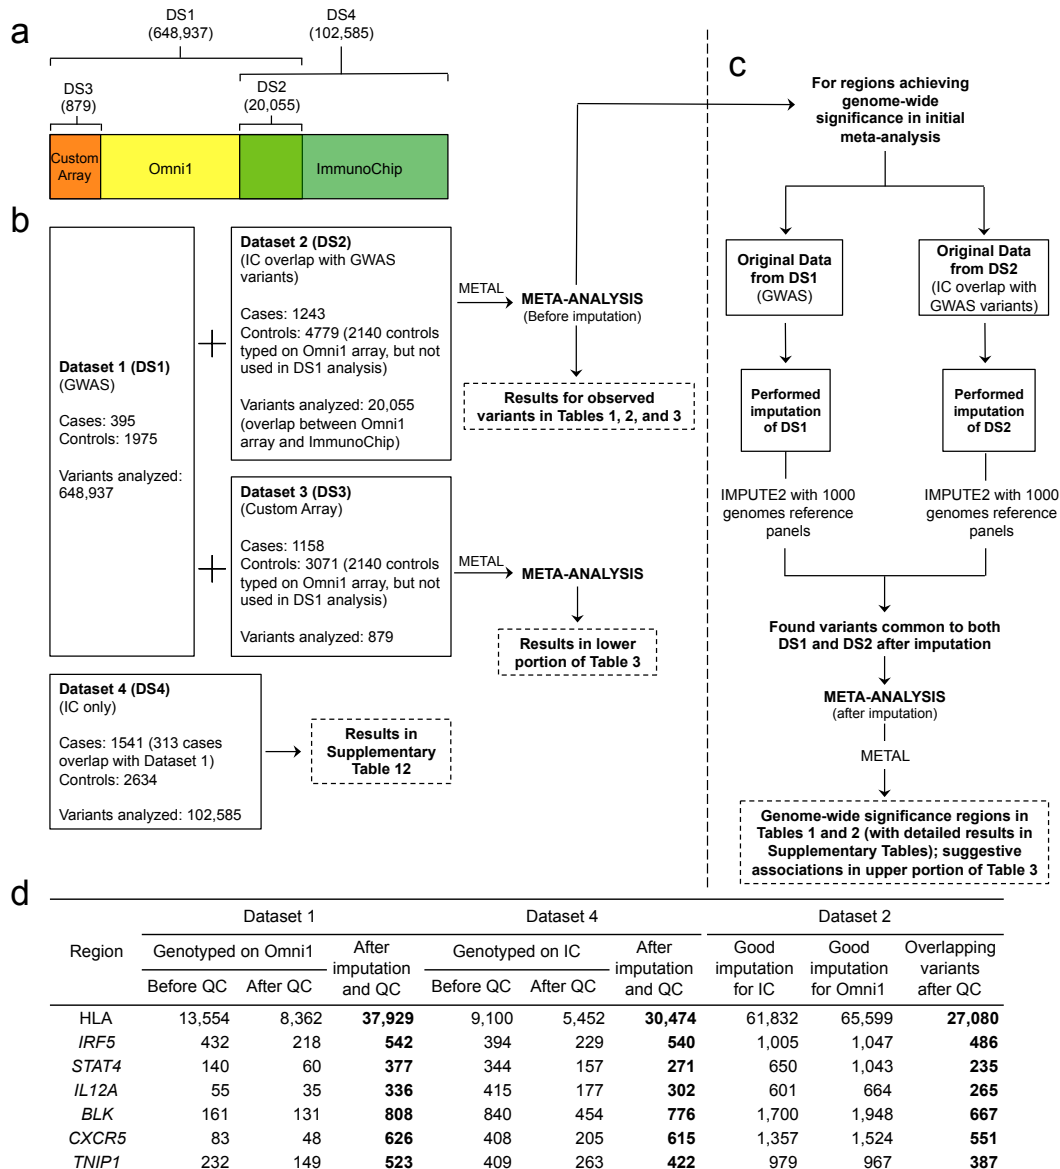

**Supplementary Figure 1:** Summary of the study design and imputation strategy. **(a)** Genotyping platforms, number of variants analyzed, and overlap of variants between the four datasets after quality control are shown. **(b)** A subset of variants that were analyzed in Dataset (DS) 1 were evaluated in an independent sample set using the ImmunoChip (DS2) and a Custom Array (DS3) followed by meta-analyses. Further evaluation of all the variants available on the ImmunoChip (DS4) was performed using all available samples typed on the array, including 313 cases also in DS1; however, this analysis was not combined with any other dataset. **(c)** Imputation was conducted for regions achieving genome-wide significance following the strategy presented in the panel. **(d)** The number of variants available for analysis (both pre- and post-quality control) from the seven genome-wide significant regions before and after imputation.

**Supplementary Figure 2: Summary of genome-wide association results.**

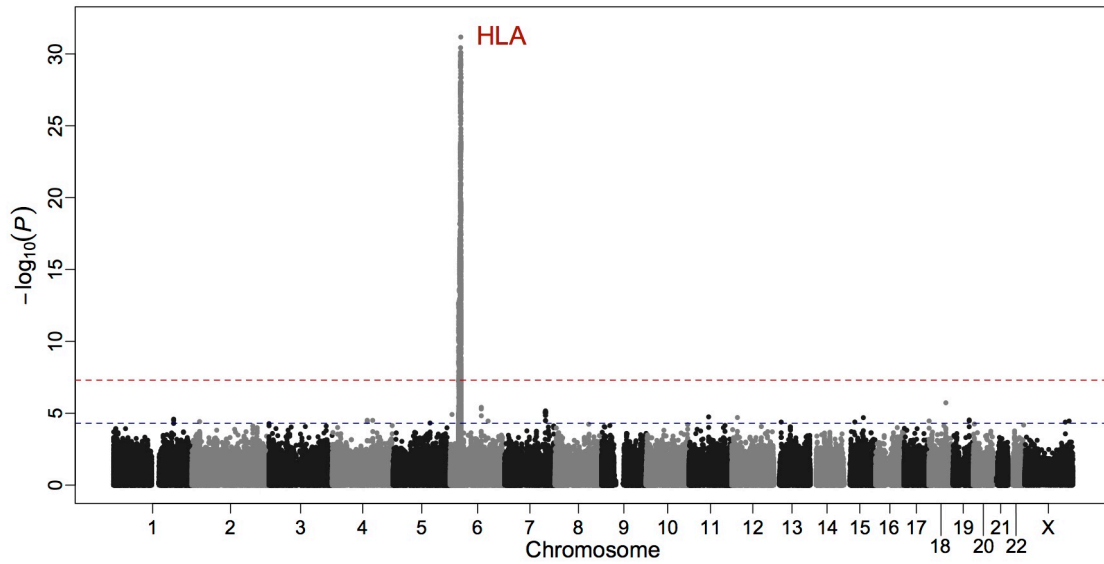

**Supplementary Figure 2:** Summary of the genome-wide association study results. The  $-\log_{10}(P)$  for each variant genotyped in Dataset 1 that passed quality control are plotted by chromosome and base pair. Suggestive ( $P=5 \times 10^{-5}$ ; blue dashed line) and genome-wide significant ( $P=5 \times 10^{-8}$ ; red dashed line) thresholds are indicated by dashed lines. Seventeen regions surpassed the suggestive threshold, while only the HLA region surpassed genome-wide significance.

**Supplementary Figure 3: Expanded view of the HLA region.**

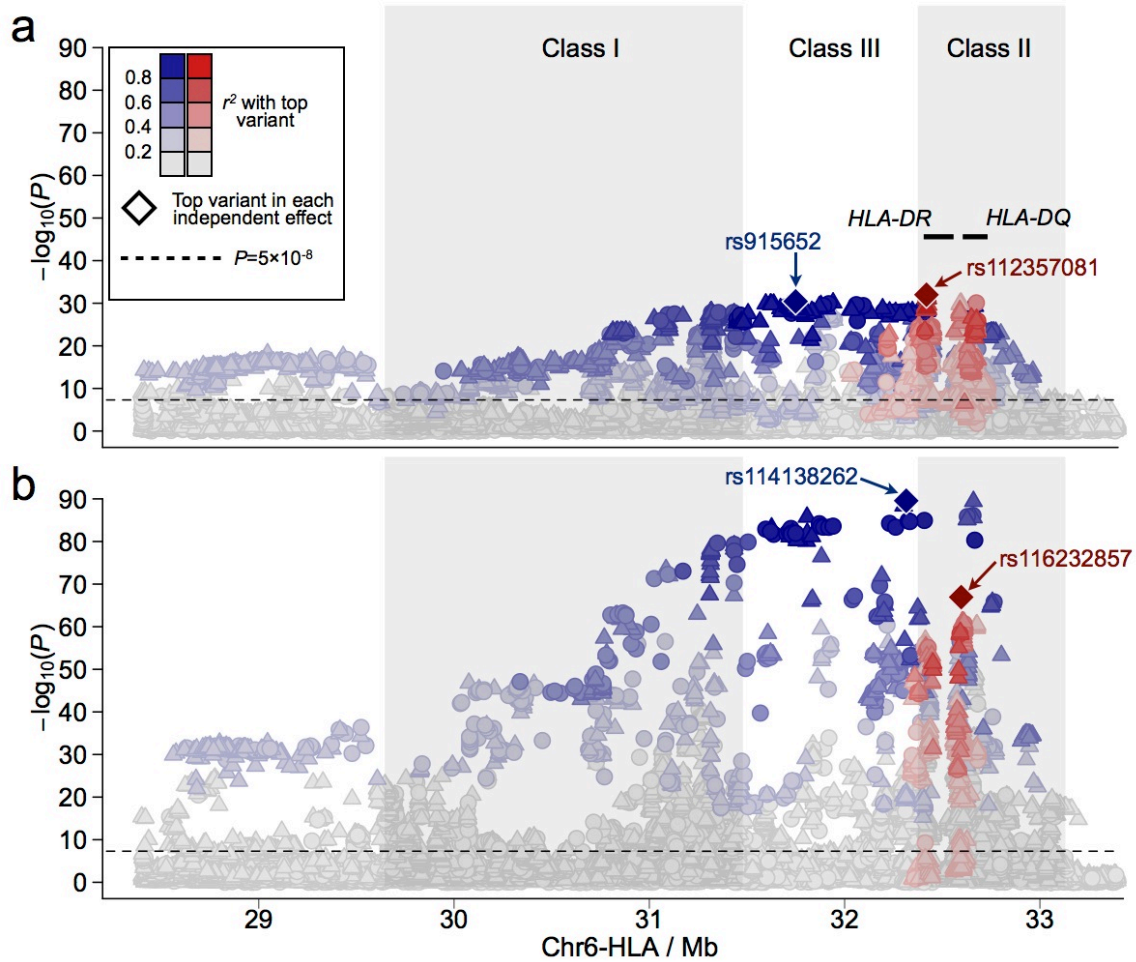

**Supplementary Figure 3:** Expanded view of the HLA region (Mb 28.4-33.4). The  $-\log_{10}(P)$  of each observed (circle) or imputed (triangle) variant is plotted according to base pair position for Dataset 1 (a) and Dataset 2 (b). The blue and red scales illustrate pairwise linkage disequilibrium ( $r^2$ ) with the top variants (diamonds), respectively.



**Supplementary Figure 4: Quantile-quantile plot of Dataset 1.**

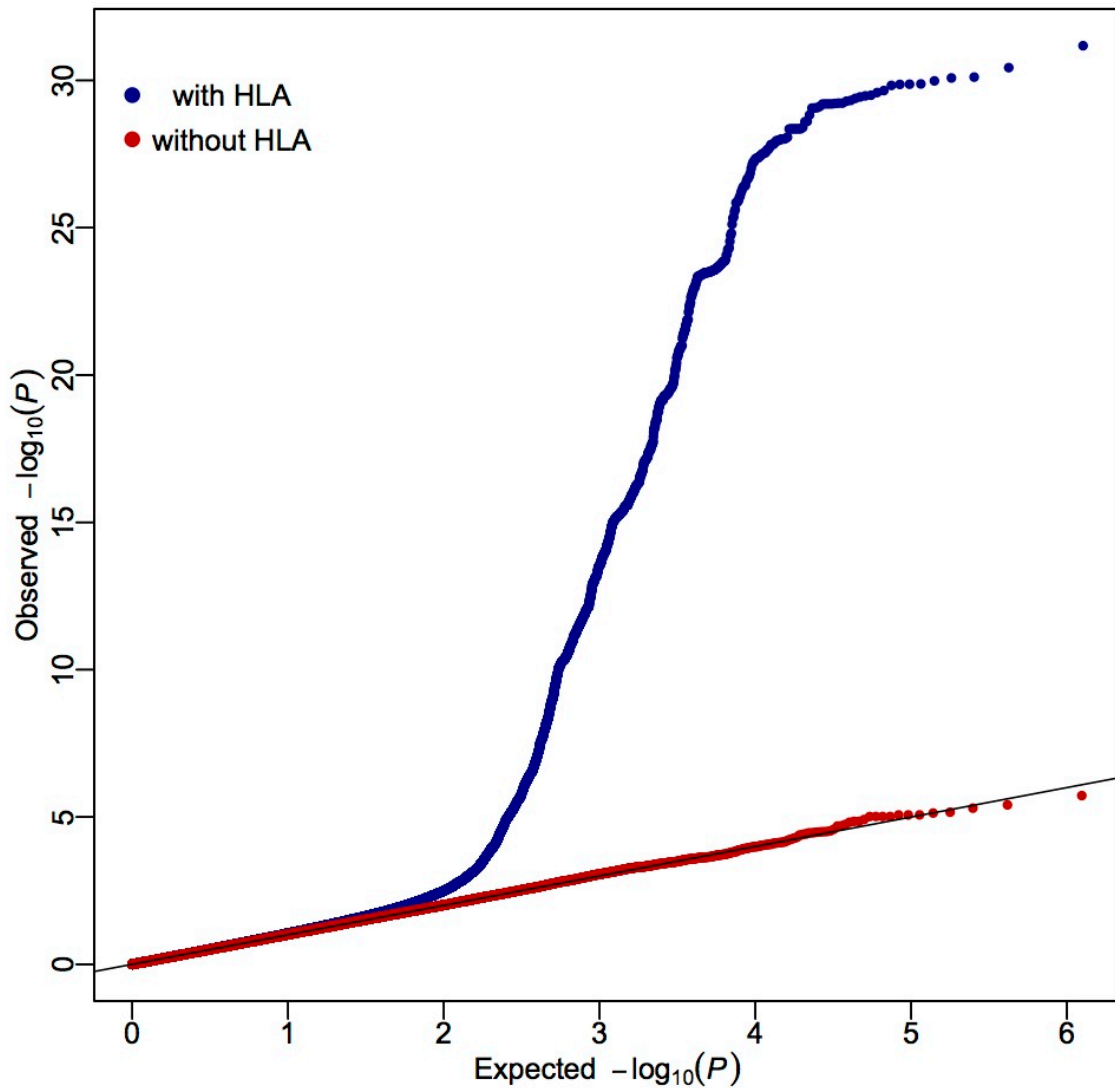

**Supplementary Figure 4:** Quantile-quantile plot of Dataset 1. Significant deviation from expected distribution of  $P$ -values (black line) was observed when including the HLA region (blue dots). After removing variants from the HLA region, we observed no significant deviation from expected distribution (red dots).

**Supplementary Figure 5: Results of logistic regression analysis after adjusting for top effects, linkage disequilibrium, and haplotypes present in the HLA region.**

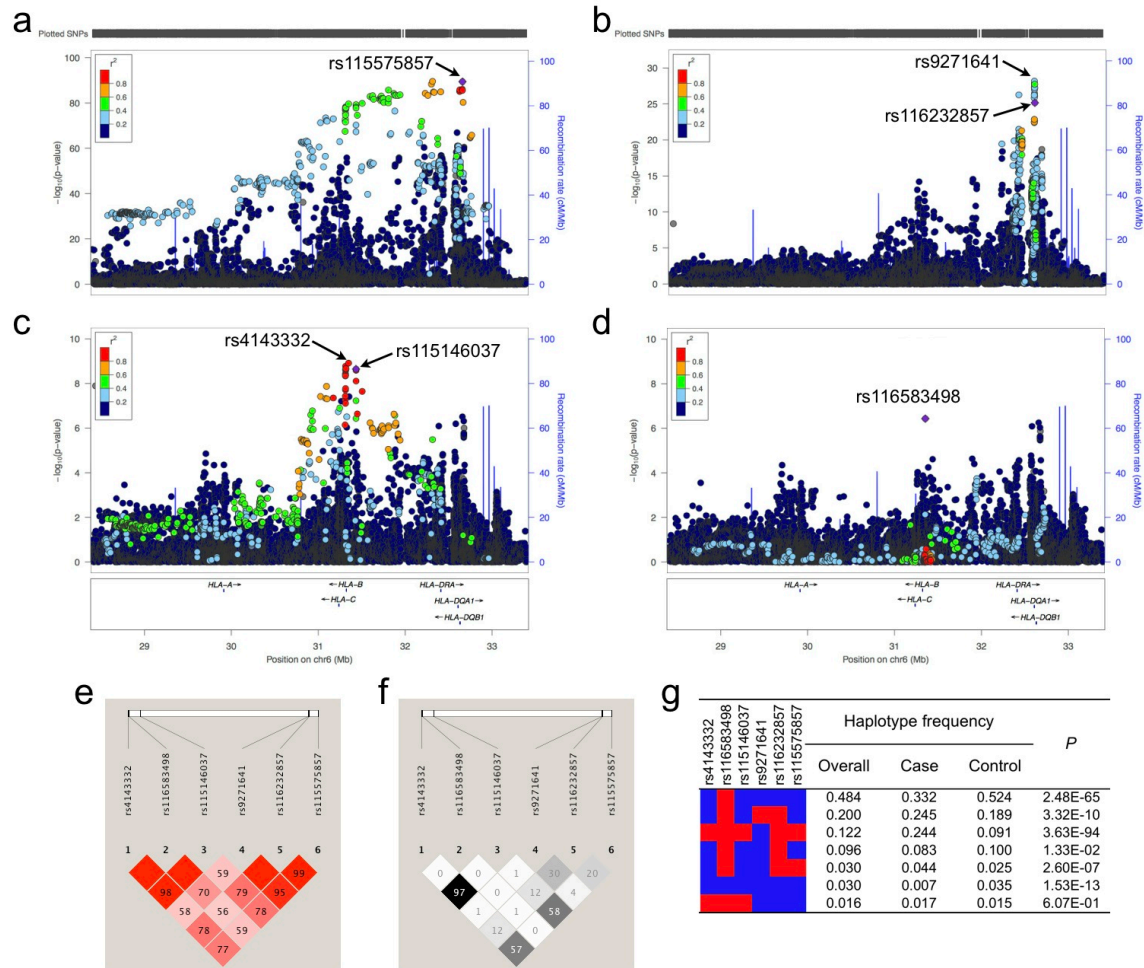

**Supplementary Figure 5: Results of logistic regression analysis after adjusting for top effects, linkage disequilibrium, and haplotypes present in the HLA region.** Logistic regression analysis was performed using Dataset 2 after imputation. Variants were chosen for adjustment in each logistic regression model based on their statistical significance within the meta-analysis. The most significant Sjögren’s syndrome-associated SNP in the meta-analysis (and Dataset 2) was rs115575857 (a). After adjusting for rs115575857, association spanning approximately from Mb 28.4 to Mb 32.7 was explained (panel a vs. b); however, a narrow region of association was still present near *HLA-DQA1* tagged by rs9271641 and rs116232857 (b). Adding rs116232857 to the model (we chose rs116232857 instead of rs9271641 because rs116232857 is more significant in the meta-analysis; the same reason for choosing rs115146037 instead of rs4143332 for the next-step adjusting analysis) showed that the association surrounding *HLA-DQA1* was accounted for with residual association observed at rs115146037 in HLA Class I region (c). Adding rs115146037 to the model was not able to explain the majority of the residual association (d). Moreover, after adjustment, neither rs116232857 nor rs115146037 could account for association observed with rs115575857; and rs115146037 could not account for association observed with rs116232857 (data not shown). The  $D'$  (e) and  $r^2$  (f) between these variants are illustrated, and the haplotypes present with a haplotype frequency >1% are depicted (g).

**Supplementary Figure 6: Association of HLA classical alleles with Sjögren's syndrome.**

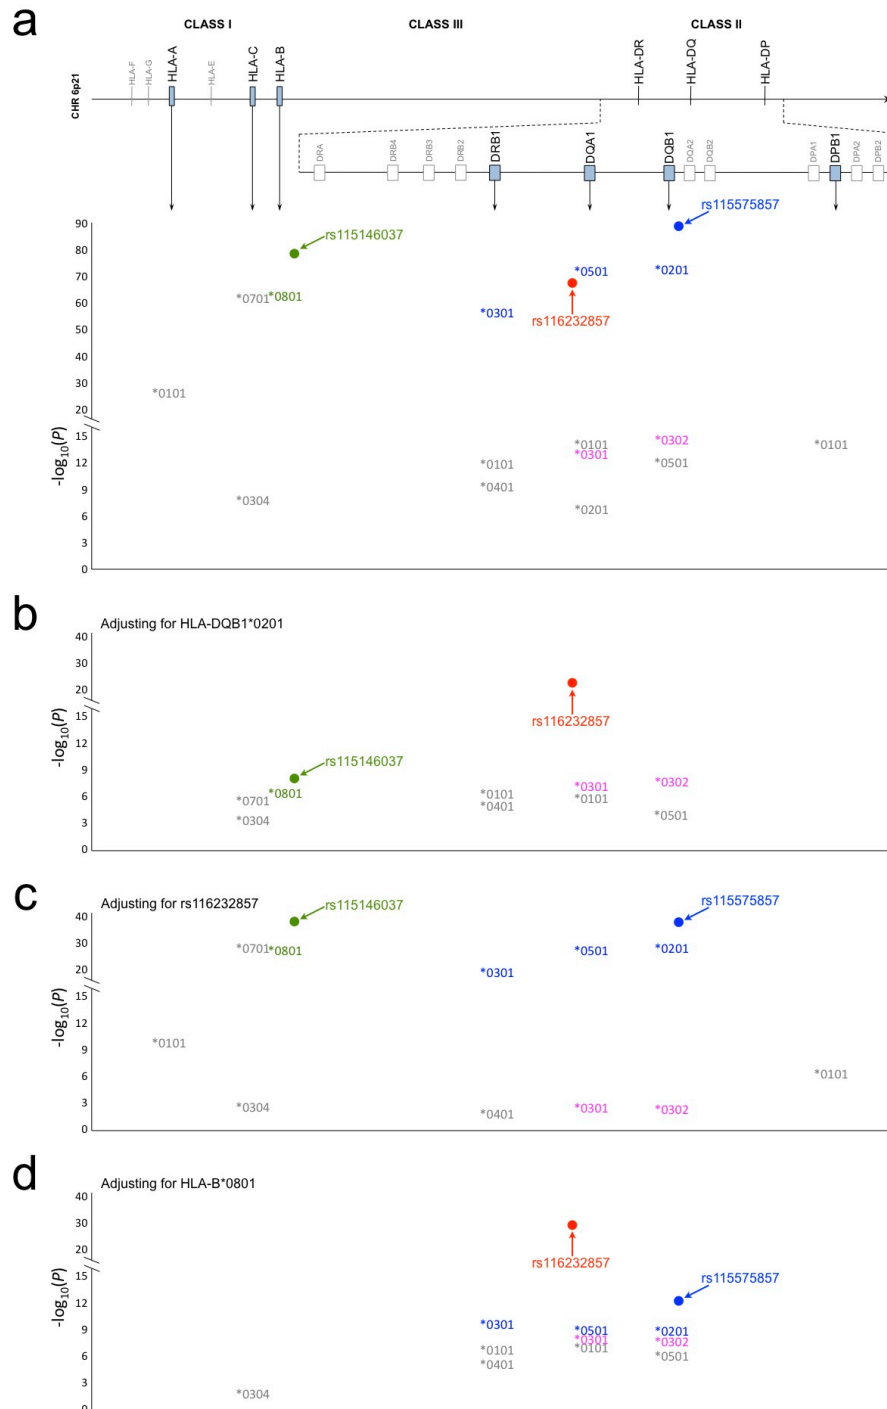

**Supplementary Figure 6:** Association of HLA classical alleles with Sjögren's syndrome. Logistic regression analysis and adjustment for classical alleles within seven HLA genes was performed using Dataset 2 after HIBAG imputation. **(a)** The locations of HLA-A, B, C, DRB1, DQA1, DQB1, and DPB1 are highlighted. The classical alleles ( $P < 5 \times 10^{-7}$ ; indicated by \*) are depicted under each corresponding gene according to the  $-\log_{10}(P)$  value of the association. The 3 SNPs (indicated by single dots) tagging the three independent effects via single marker adjusting analysis (Supplementary Figure 4) are plotted. Through logistic regression analyses adjusted for Sjögren's syndrome-associated classical alleles / SNPs, we identified three main independent effects in the HLA region (tagging classical alleles / SNPs are marked as blue, red, and green) and a possible fourth effect (pink) **(b, c, d)**; only show classical alleles / SNPs with  $P < 0.01$  after adjusted logistic regression analysis). Classical alleles / SNPs with the same color are highly correlated with each other ( $r^2 \geq 0.97$ ).

**Supplementary Figure 7: Sjögren's syndrome-associated variants in the HLA region within 100bp of RFX5 binding site were correlated with the expression of HLA genes.**

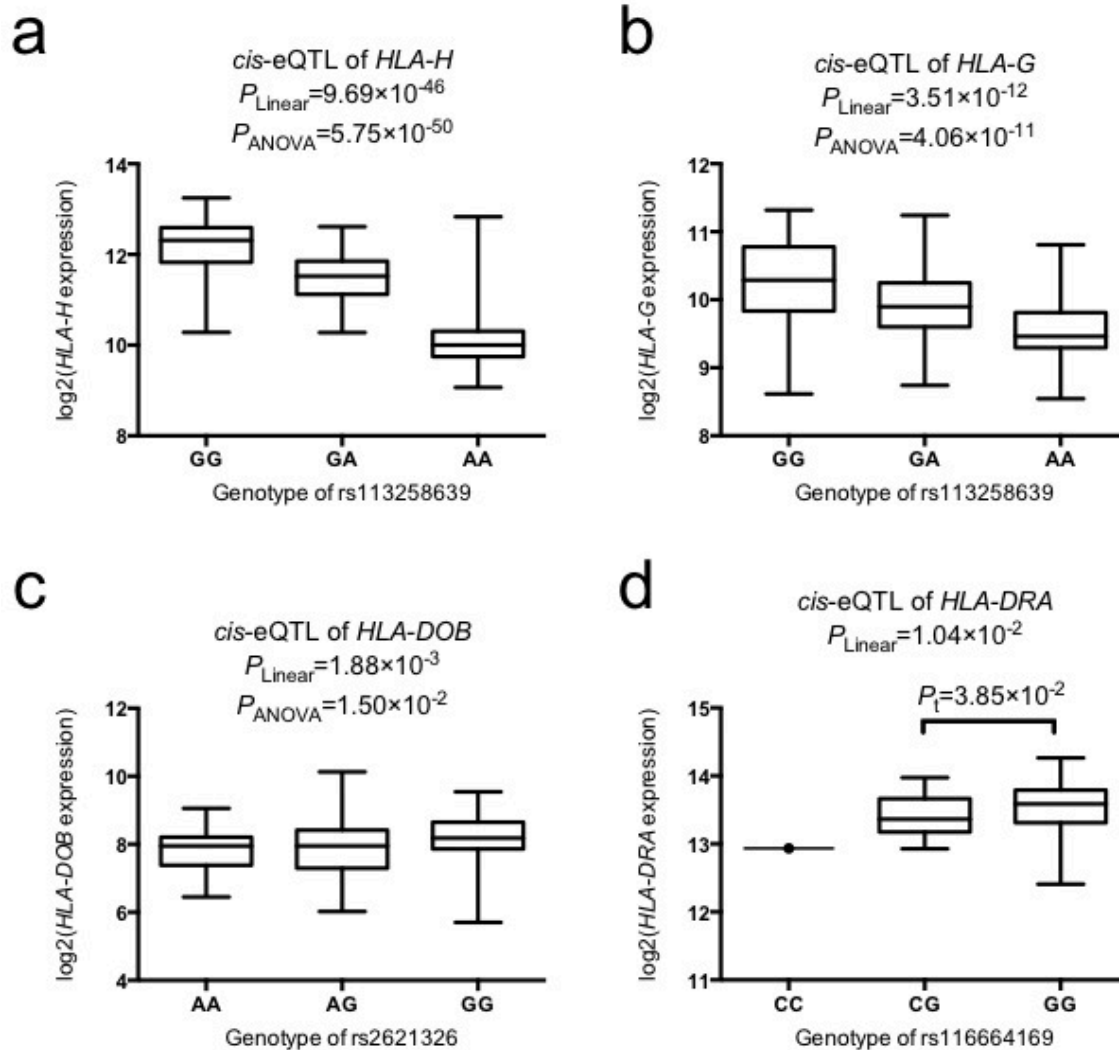

**Supplementary Figure 7:** Sjögren's syndrome-associated variants in the HLA region within 100bp of RFX5 binding site were correlated with the expression of HLA genes. The top *cis*-eQTL in *HLA-H* (a), *HLA-G* (b), *HLA-DOB* (c), and *HLA-DRA* (d) are shown in the figure. The risk genotype of each eQTL variant is plotted on the right side of each figure. Data are shown using box-and-whisker plots, in which distribution of the expression values are highlighted (median, upper quantile, lower quantile, maximum, and minimum). Each eQTL was evaluated using both a linear model and Analysis of Variance (ANOVA) model. *HLA-DRA* (Panel d) only had one subject with the CC genotype; thus, we performed a t-test rather than an ANOVA to compare the CG to the GG genotype.

**Supplementary Figure 8: Expanded view of the *IRF5-TNPO3* region.**

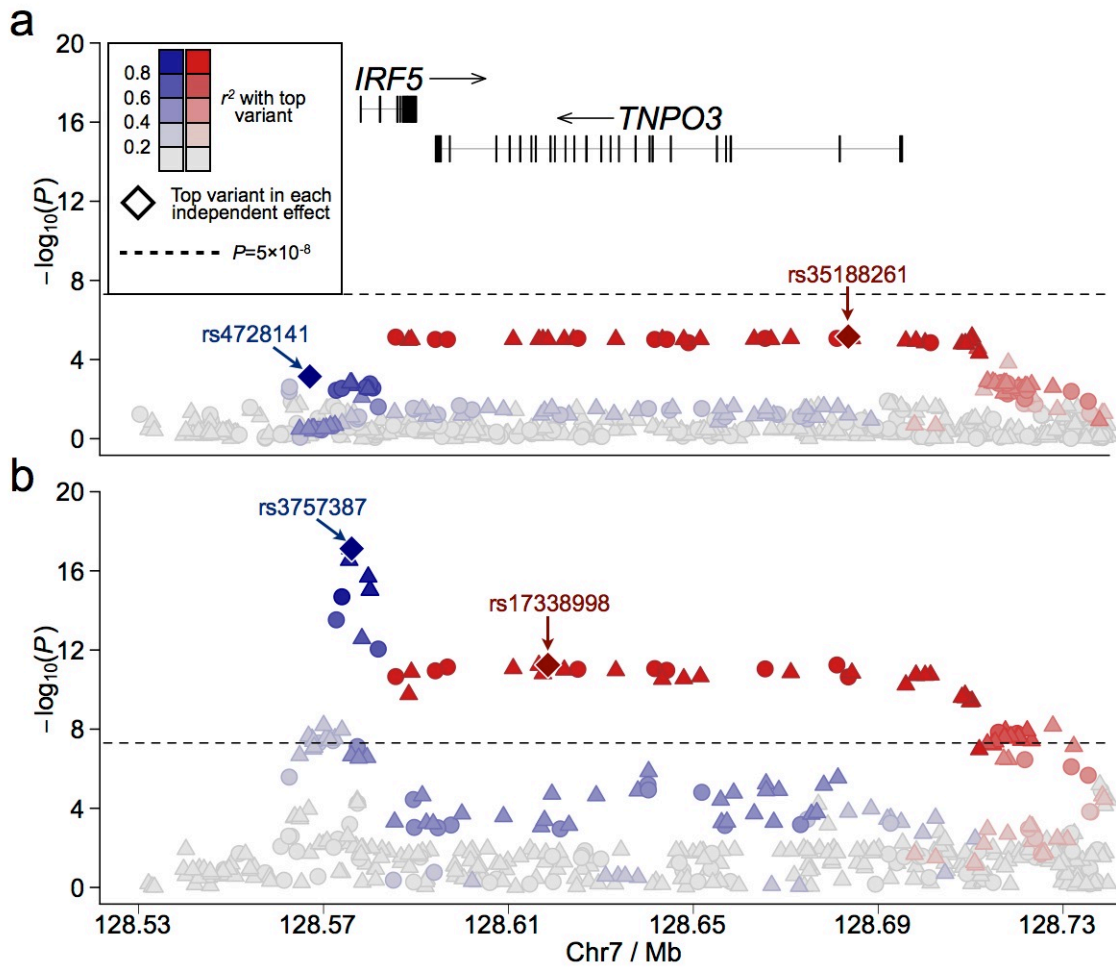

**Supplementary Figure 8:** Expanded view of the *IRF5-TNPO3* region. The  $-\log_{10}(P)$  of each observed (circle) or imputed (triangle) variant is plotted according to base pair position for Dataset 1 (**a**) and Dataset 2 (**b**). The blue and red scales illustrate the pairwise linkage disequilibrium with the top variants (diamonds), respectively.

**Supplementary Figure 9: Results of logistic regression analysis after adjusting for top effects, linkage disequilibrium, and haplotypes present in the *IRF5-TNPO3* region.**

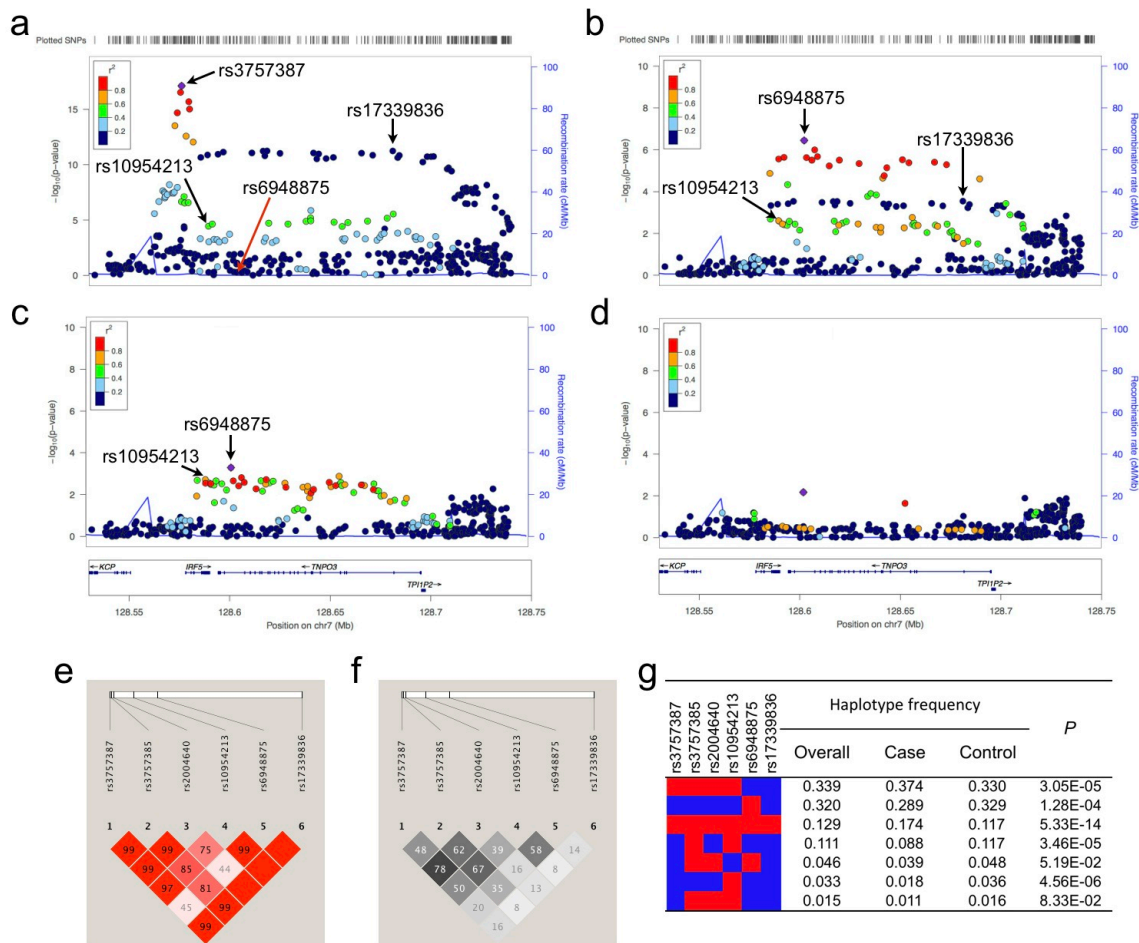

**Supplementary Figure 9: Results of logistic regression analysis after adjusting for top effects, linkage disequilibrium, and haplotypes present in the *IRF5-TNPO3* region.** Logistic regression analysis was performed using Dataset 2 after imputation. Variants were chosen for adjustment in each logistic regression model based on their statistical significance within the meta-analysis. The most significant Sjögren's syndrome-associated SNP in the meta-analysis (and Dataset 2) was rs3757387 (**a**). Adjusting for rs3757387 showed residual association with rs17339836 ( $P_{residual}=2.86 \times 10^{-4}$ ); however, variants previously not associated with Sjögren's syndrome, tagged by rs6948875, became the most statistically significant (**b**). Adjusting for rs3757387 and rs17339836 still resulted in residual association tagged by rs6948875 (**c**), while adjusting for rs17339836 alone did not lead to the residual effect of rs6948875 (data not shown). Adding rs10954213 (statistically significant in single marker analysis) to the model explained all associations in the region (**d**). The pairwise  $D'$  (**e**) and  $r^2$  (**f**) for the top variants are illustrated, and the haplotypes with haplotype frequency  $>1\%$  are displayed (**g**).

**Supplementary Figure 10: Genomic features from data tracks in the UCSC Genome Browser in the region around *IRF5-TNPO3*.**

**NOTE: Figure presented on next page.**

**Supplementary Figure 10:** This figure presents genomic features found within various data tracks obtained from the UCSC Genome Browser for the region of Chr7 from 128.56-128.74 Mb (hg19), in which the genes *IRF5* and *TNPO3* are found. Variants presented surpassed suggestive association ( $P < 5 \times 10^{-5}$ ) threshold. Meta-analysis association results are presented as a Manhattan plot, where  $-\log(P_{meta})$  is presented in the y-axis and suggestive and genome-wide significance ( $P < 5 \times 10^{-8}$ ) thresholds are represented as a solid line and a dashed line, respectively. Genomic boundaries were selected to encompass not only significant associations, but also the diminishing association signals on either side of the strongest associations. No eQTL data is available for *IRF5* due to the transcript probe failing quality control.





**Supplementary Figure 11: Expanded view of the *STAT1-STAT4* region.**

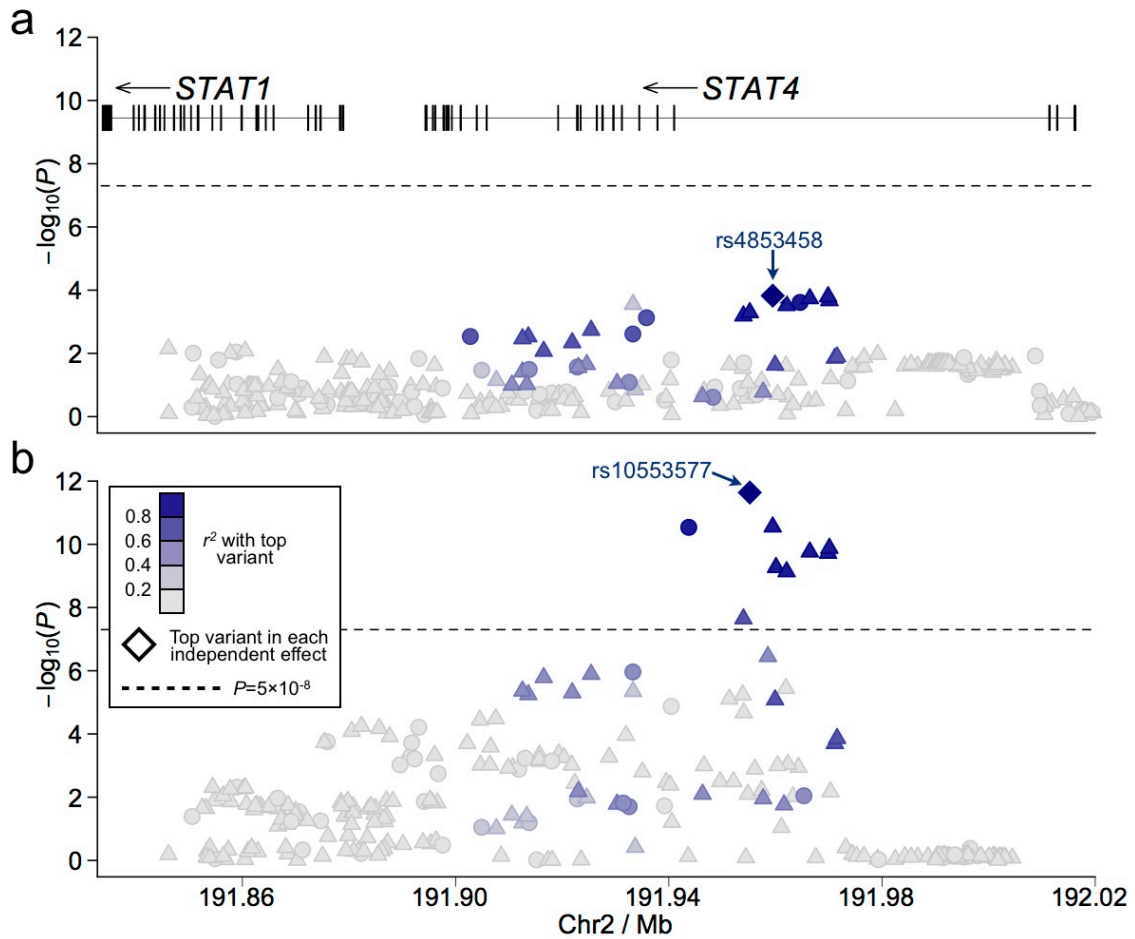

**Supplementary Figure 11: Expanded view of the *STAT1-STAT4* region.** The  $-\log_{10}(P)$  of each observed (circle) or imputed (triangle) variant is plotted according to base pair position for Dataset 1 (a) and Dataset 2 (b). The blue scale illustrates the pairwise linkage disequilibrium with the top variant (diamonds).

**Supplementary Figure 12: Results of logistic regression analysis after adjusting for top effects, linkage disequilibrium, and haplotypes present in the *STAT1-STAT4* region.**

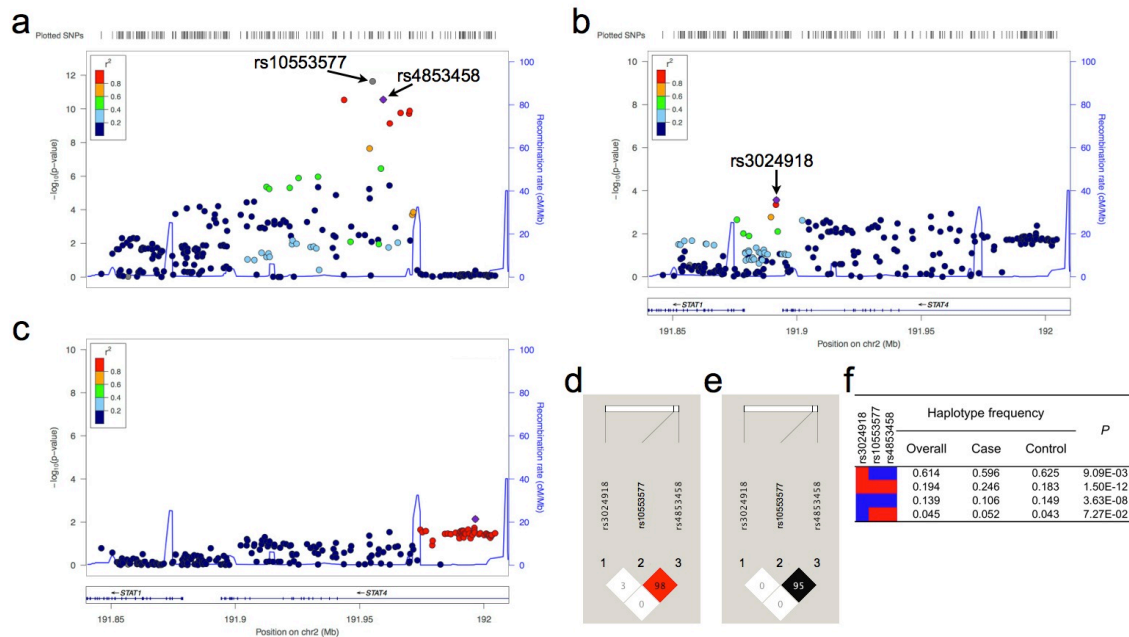

**Supplementary Figure 12: Results of logistic regression analysis after adjusting for top effects, linkage disequilibrium, and haplotypes present in the *STAT1-STAT4* region.** Logistic regression analysis was performed using Dataset 2 after imputation. Variants were chosen for adjustment in each logistic regression model based on their statistical significance within the meta-analysis. The most significant Sjögren’s syndrome-associated variant in the meta-analysis (and Dataset 2) was rs10553577 (a). This insertion-deletion polymorphism is not available in the LocusZoom database; thus we used the second top SNP rs4853458 ( $r^2=0.95$  with rs10553577) to show the correlation structure in the region. Adjusting for rs10553577 accounted for all associations in *STAT4*, leaving a residual effect tagged by rs3024918 ( $P_{residual}=2.70\times 10^{-4}$ ) in the 5’ region of *STAT1* (b). However, this residual effect did not surpass our required threshold ( $P<1\times 10^{-4}$ ) after adjustment for an independent effect. Adding rs3024918 to the adjusted model accounted for all association in *STAT1-STAT4* (c). The pairwise  $D'$  (d) and  $r^2$  (e) for the top variants are illustrated, and the haplotypes with haplotype frequency >1% are displayed (f).

**Supplementary Figure 13: Genomic features from data tracks in the UCSC Genome Browser in the region around *STAT1-STAT4*.**

**NOTE: Figure presented on next page.**

**Supplementary Figure 13:** This figure presents genomic features found within various data tracks obtained from the UCSC Genome Browser for the region of Chr2 from 191.86-191.98 Mb (hg19), which encompasses the genes *STAT1* and *STAT4*. Variants presented surpassed suggestive association ( $P < 5 \times 10^{-5}$ ) threshold. Meta-analysis association results are presented as a Manhattan plot, where  $-\log(P_{meta})$  is presented in the y-axis and suggestive and genome-wide significance ( $P < 5 \times 10^{-8}$ ) thresholds are represented as a solid line and a dashed line, respectively. Genomic boundaries were selected to encompass not only significant associations, but also the diminishing association signals on either side of the strongest associations. No eQTL was observed at Sjögren's syndrome-associated variants in this region.



**Supplementary Figure 14: Expanded view of the *IL12A* region.**

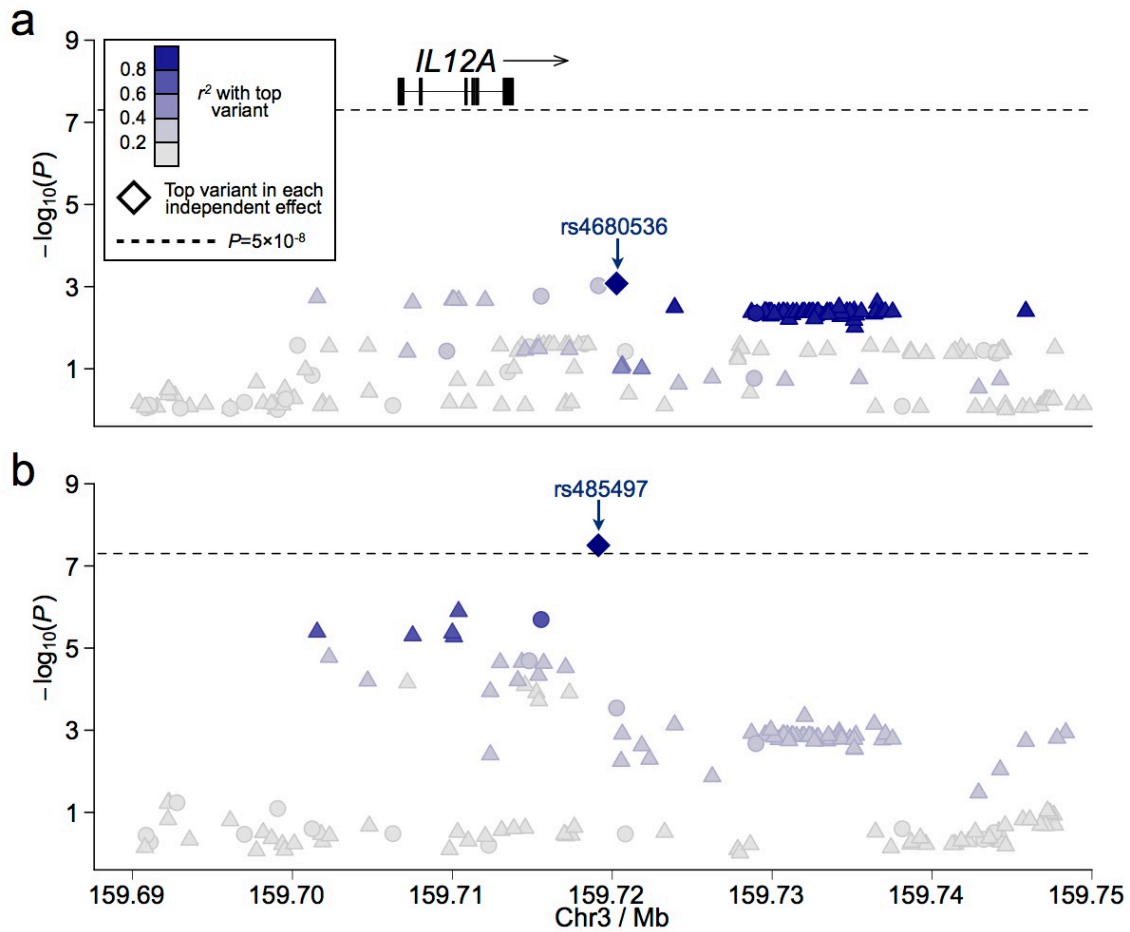

**Supplementary Figure 14:** Expanded view of the *IL12A* region. The  $-\log_{10}(P)$  of each observed (circle) or imputed (triangle) variant is plotted according to base pair position for Dataset 1 (a) and Dataset 2 (b). The blue scale illustrates the pairwise linkage disequilibrium with the top variant (diamonds).

**Supplementary Figure 15: Results of logistic regression analysis after adjusting for top effects, linkage disequilibrium, and haplotypes present in the *IL12A* region.**

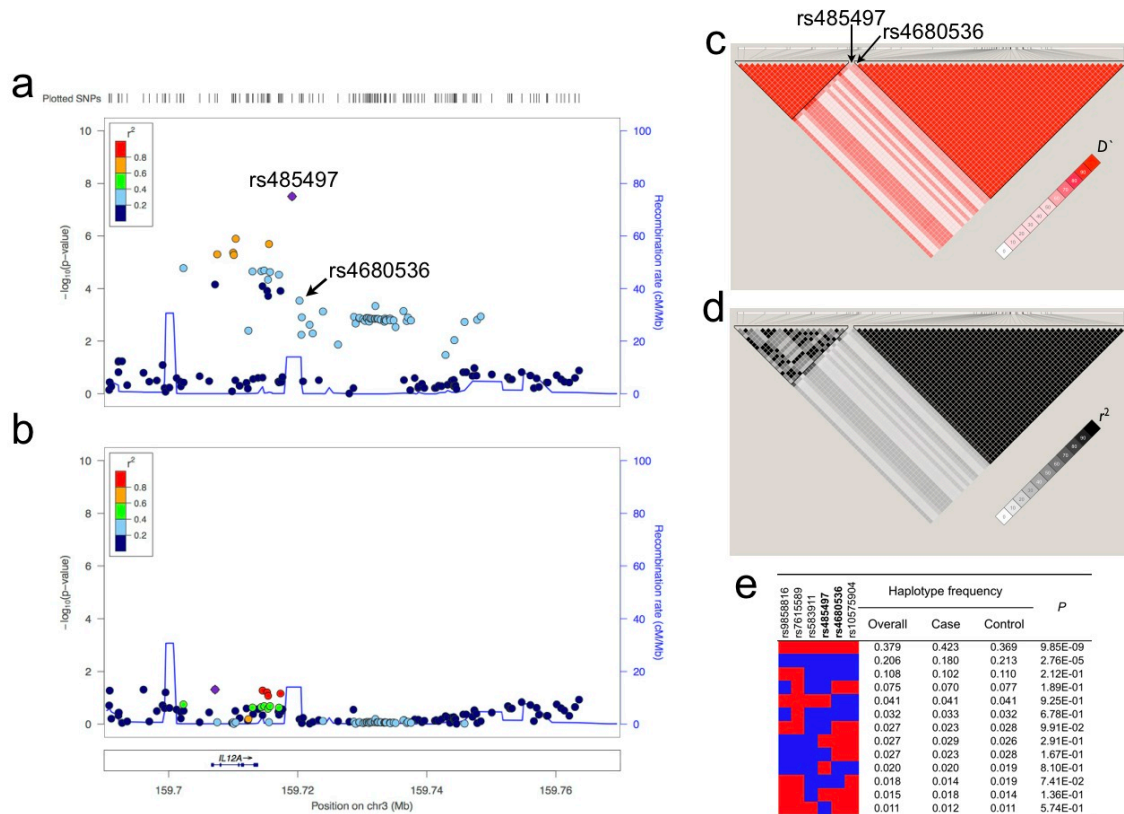

**Supplementary Figure 15:** Results of logistic regression analysis after adjusting for top effects, linkage disequilibrium, and haplotypes present in the *IL12A* region. Logistic regression analysis was performed using Dataset 2 after imputation. Variants were chosen for adjustment in each logistic regression model based on their statistical significance within the meta-analysis. The most significant Sjögren's syndrome-associated SNP in the meta-analysis (and Dataset 2) was rs485497 (a). Adjusting for rs485497 accounted for all associations in this region (b). The pairwise  $D'$  (c) and  $r^2$  (d) for the top variants are illustrated. rs485497 was at the intersection between the two LD blocks in this region, and correlated with both of the blocks. Notably, all the suggestive variants on the right block are eQTL with respect to the expression of *IL12A*, with the top eQTL at rs4680536. The haplotypes with haplotype frequency >1% are displayed (e).

**Supplementary Figure 16: Genomic features from data tracks in the UCSC Genome Browser in the region around *IL12A*.**

**NOTE: Figure presented on next page.**

**Supplementary Figure 16:** This figure presents genomic features found within various data tracks obtained from the UCSC Genome Browser for the region of Chr3 159.69-159.75 Mb (hg19), which encompasses the gene *IL12A*. Variants presented surpassed suggestive association ( $P < 5 \times 10^{-5}$ ) threshold. Meta-analysis association results are presented as a Manhattan plot, where  $-\log(P_{meta})$  is presented in the y-axis and suggestive and genome-wide significance ( $P < 5 \times 10^{-8}$ ) thresholds are represented as a solid line and a dashed line, respectively. Genomic boundaries were selected to encompass not only significant associations, but also the diminishing association signals on either side of the strongest associations. Statistically significant results for eQTL (FDR adjusted  $P$  value  $< 0.05$ ) are displayed as  $-\log(P)$ , with the solid line representing a threshold of  $P < 0.05$ .





**Supplementary Figure 17: Expanded view of the *FAM167A*-*BLK* region.**

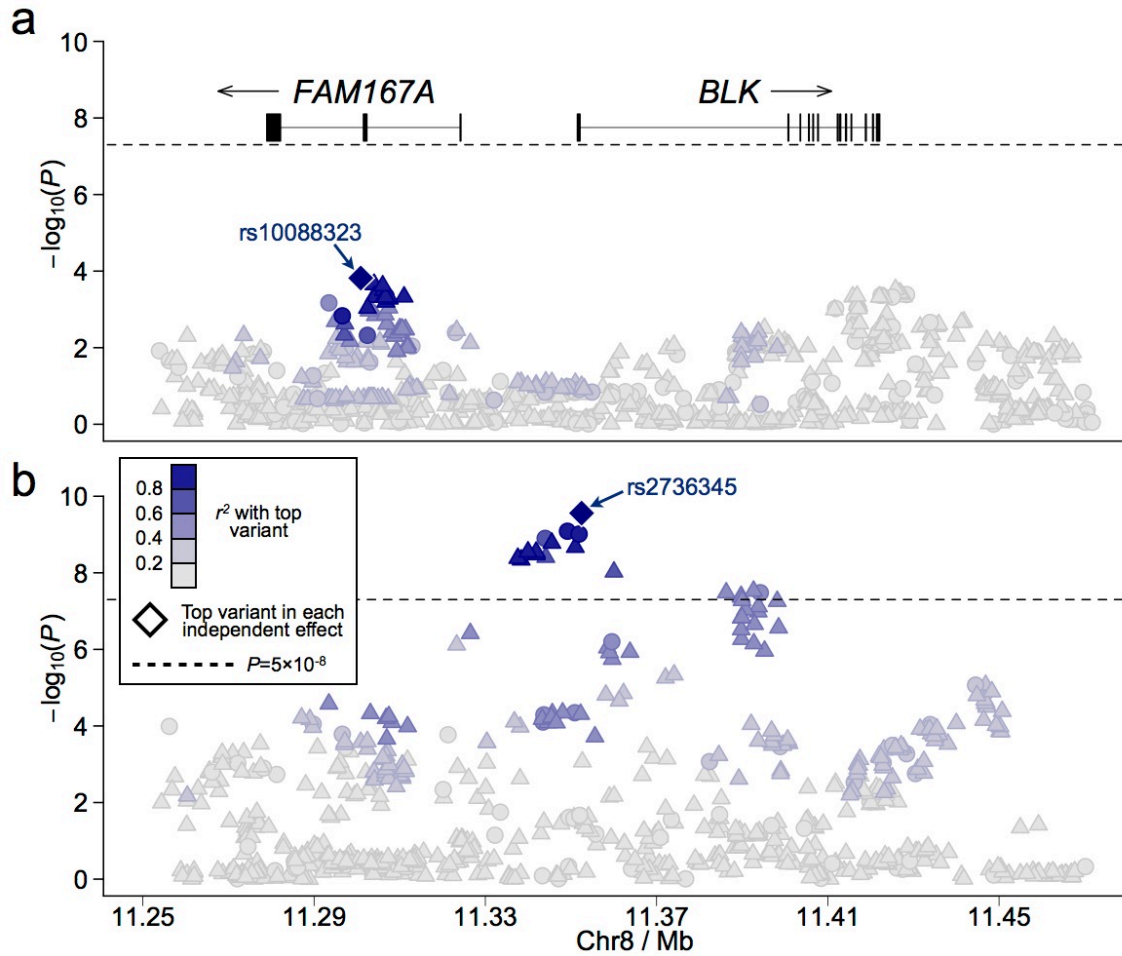

**Supplementary Figure 17: Expanded view of the *FAM167A*-*BLK* region.** The  $-\log_{10}(P)$  of each observed (circle) or imputed (triangle) variant is plotted according to base pair position for Dataset 1 (a) and Dataset 2 (b). The blue scale illustrates the pairwise linkage disequilibrium with the top variant (diamonds).

**Supplementary Figure 18: Results of logistic regression analysis after adjusting for top effects, linkage disequilibrium, and haplotypes present in the *FAM167A-BLK* region.**

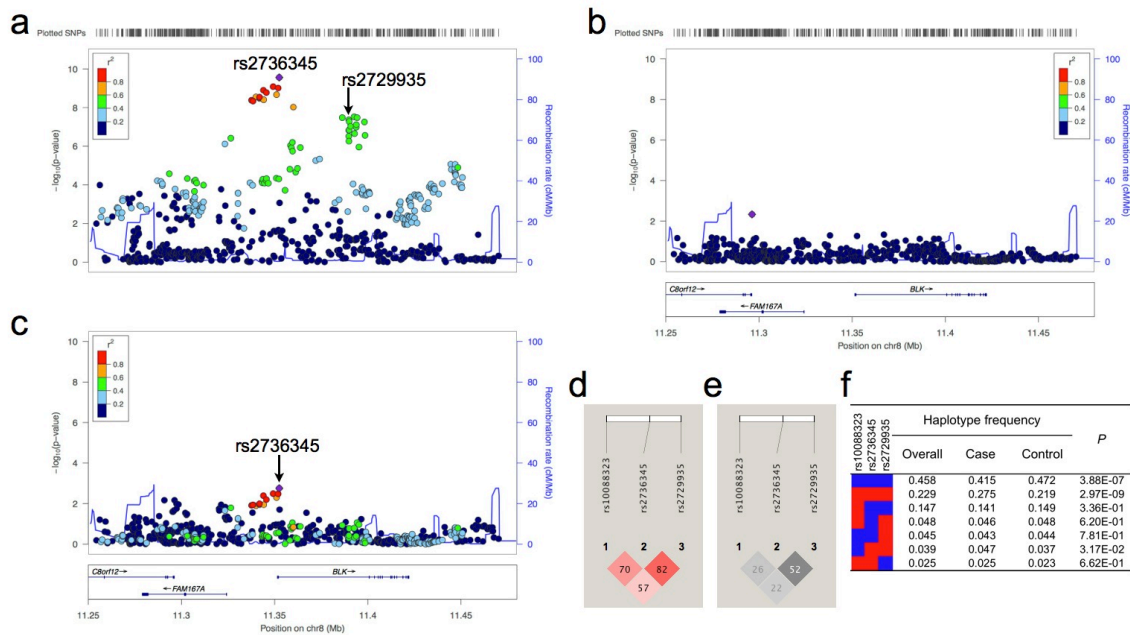

**Supplementary Figure 18: Results of logistic regression analysis after adjusting for top effects, linkage disequilibrium, and haplotypes present in the *FAM167A-BLK* region.** Logistic regression analysis was performed using Dataset 2 after imputation. Variants were chosen for adjustment in each logistic regression model based on their statistical significance within the meta-analysis. The most significant Sjögren’s syndrome-associated SNP in the meta-analysis (and Dataset 2) was rs2736345 (**a**); however, this SNP was not significant in Dataset 1. Rs2729935 was the second top SNP in meta-analysis, and was significant in both Dataset 1 and Dataset 2. Logistic regression adjusting for rs2736345 was able to account for all association in the region (**b**), while adjusting for rs2729935 indicated residual association present at rs2736345 ( $P_{residual}=1.75 \times 10^{-3}$ ) (**c**). The pairwise  $D'$  (**d**) and  $r^2$  (**e**) for the top variants are illustrated, and the haplotypes with haplotype frequency  $>1\%$  are displayed (**f**).

**Supplementary Figure 19: Genomic features from data tracks in the UCSC Genome Browser in the region around *FAM167A-BLK*.**

**NOTE: Figure presented on next page.**

**Supplementary Figure 19:** This figure presents genomic features found within various data tracks obtained from the UCSC Genome Browser for the region of Chr8 11.25-11.46 Mb (hg19), which encompasses the genes *BLK* and *FAM167A*. Variants presented surpassed suggestive association ( $P < 5 \times 10^{-5}$ ) threshold. Meta-analysis association results are presented as a Manhattan plot, where  $-\log(P_{meta})$  is presented in the y-axis and suggestive and genome-wide significance ( $P < 5 \times 10^{-8}$ ) thresholds are represented as a solid line and a dashed line, respectively. Genomic boundaries were selected to encompass not only significant associations, but also the diminishing association signals on either side of the strongest associations. Statistically significant results for eQTL (FDR adjusted  $P$  value  $< 0.05$ ) are displayed as  $-\log(P)$ , with the solid line representing a threshold of  $P < 0.05$ .

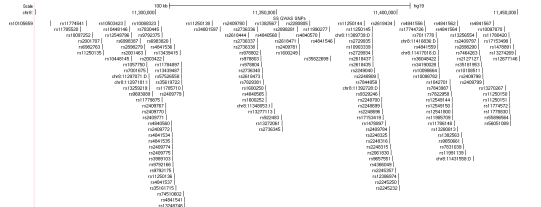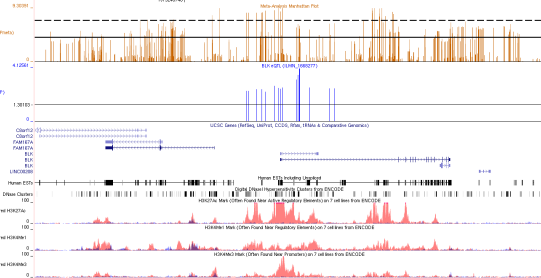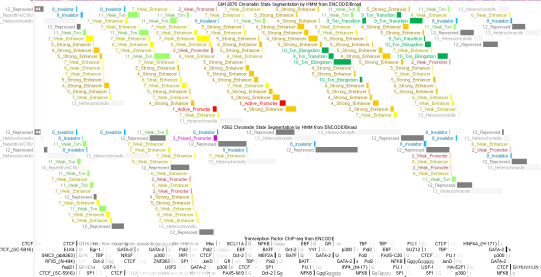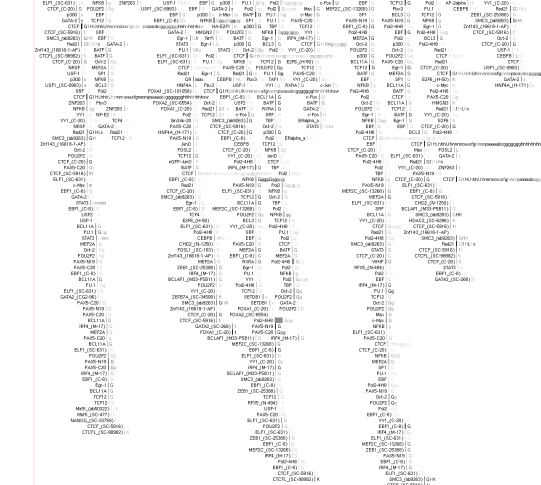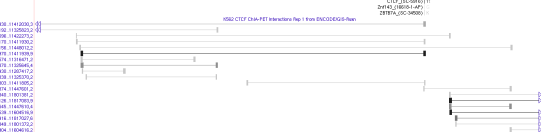

**Supplementary Figure 20: Expanded view of the *DDX6*-*CXCR5* region.**

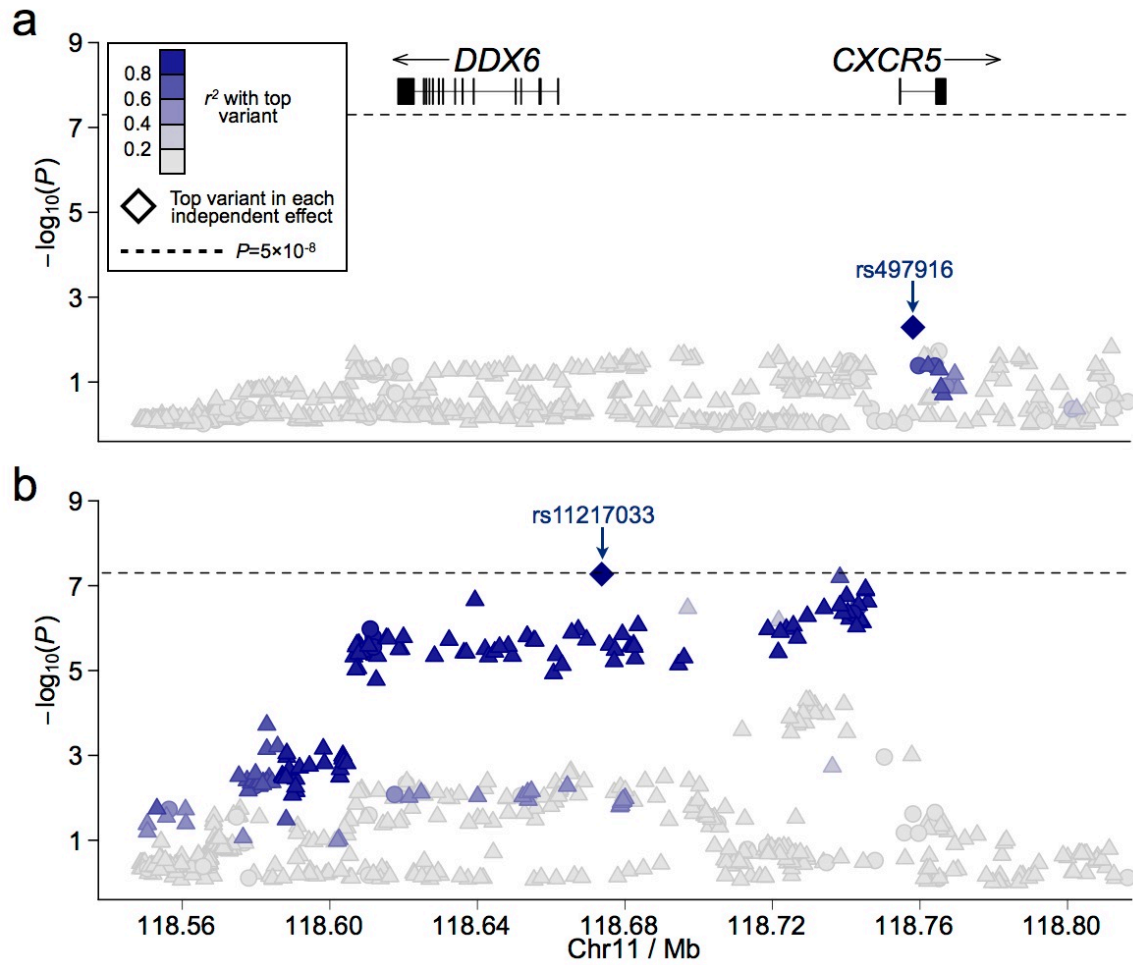

**Supplementary Figure 20:** Expanded view of the *DDX6*-*CXCR5* region. The  $-\log_{10}(P)$  of each observed (circle) or imputed (triangle) variant is plotted according to base pair position for Dataset 1 (a) and Dataset 2 (b). The blue scale illustrates the pairwise linkage disequilibrium with the top variant (diamonds).

**Supplementary Figure 21: Results of logistic regression analysis after adjusting for top effects, linkage disequilibrium, and haplotypes present in the *CXCR5* region.**

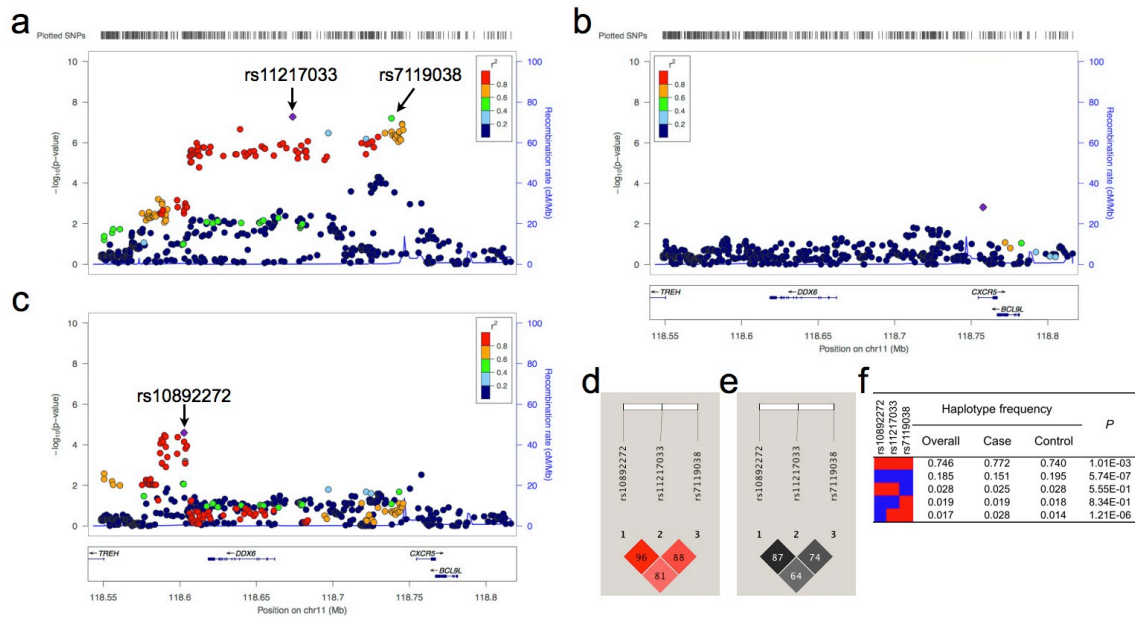

**Supplementary Figure 21: Results of logistic regression analysis after adjusting for top effects, linkage disequilibrium, and haplotypes present in the *DDX6*-*CXCR5* region.** Logistic regression analysis was performed using Dataset 2 after imputation. Variants were chosen for adjustment in each logistic regression model based on their statistical significance within the meta-analysis. The most significant Sjögren’s syndrome-associated SNP in the Dataset 2 was rs11217033 at 5’ to *DDX6*, but the top SNP in meta-analysis was rs7119038 at the promoter region of *CXCR5* (a). Logistic regression adjusting for rs7119038 was able to account for all association in the region (b), while adjusting for rs11217033 indicated residual association tagged by rs10892272 ( $P_{residual}=2.56 \times 10^{-5}$ ) (c). The pairwise  $D'$  (d) and  $r^2$  (e) for the top variants are illustrated, and the haplotypes with haplotype frequency >1% are displayed (f).

**Supplementary Figure 22: Genomic features from data tracks in the UCSC Genome Browser in the region around *CXCR5*.**

**NOTE: Figure presented on next page.**

**Supplementary Figure 22:** This figure presents genomic features found within various data tracks obtained from the UCSC Genome Browser for the region of Chr11 from 118.58-118.78 Mb (hg19), in which the genes *CXCR5* and *DDX6* are found. Variants presented surpassed suggestive association ( $P < 5 \times 10^{-5}$ ) threshold. Meta-analysis association results are presented as a Manhattan plot, where  $-\log(P_{meta})$  is presented in the y-axis and suggestive and genome-wide significance ( $P < 5 \times 10^{-8}$ ) thresholds are represented as a solid line and a dashed line, respectively. Genomic boundaries were selected to encompass not only significant associations, but also the diminishing association signals on either side of the strongest associations. No eQTL data is available for *DDX6* due to the transcript probe failing quality controls, while no significant eQTL results were identified for *CXCR5*.





**Supplementary Figure 23: Expanded view of the *TNIP1* region.**

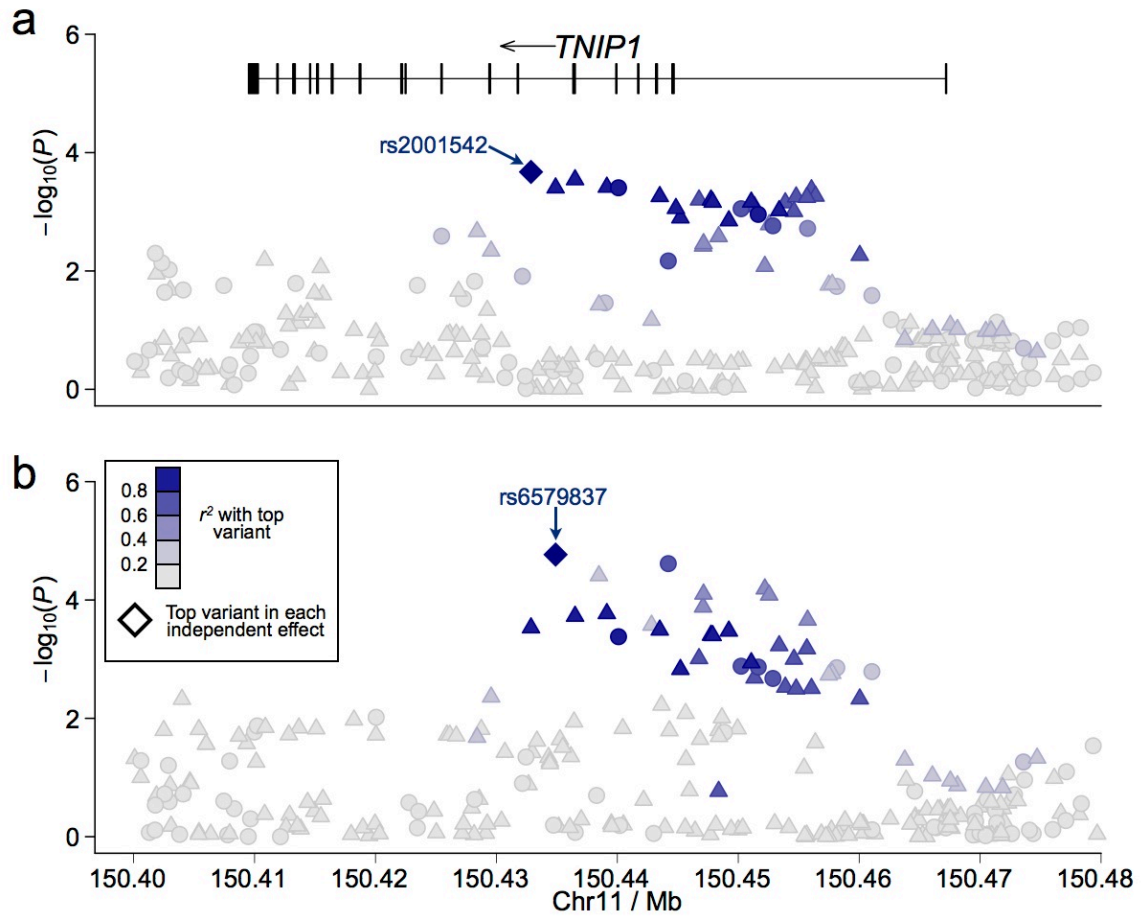

**Supplementary Figure 23: Expanded view of the *TNIP1* region.** The  $-\log_{10}(P)$  of each observed (circle) or imputed (triangle) variant is plotted according to base pair position for Dataset 1 (a) and Dataset 2 (b). The blue scale illustrates the pairwise linkage disequilibrium with the top variant (diamonds).

**Supplementary Figure 24: Results of logistic regression analysis after adjusting for top effects, linkage disequilibrium, and haplotypes present in the *TNIP1* region.**

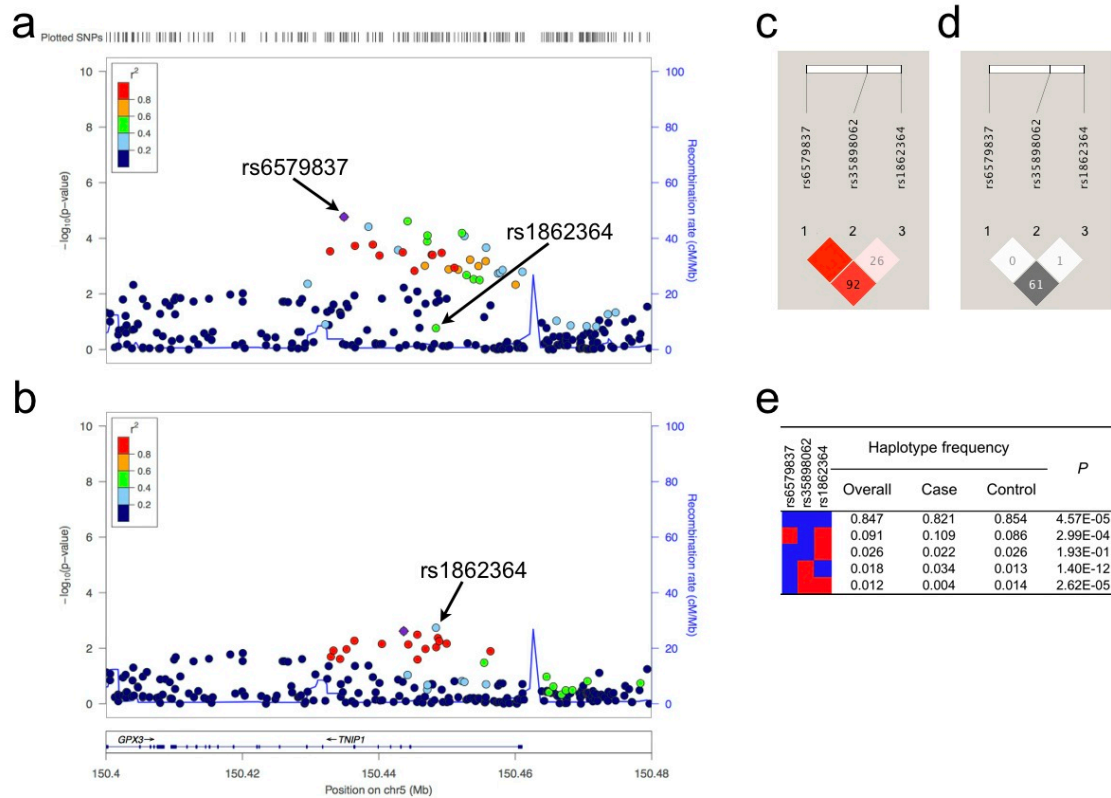

**Supplementary Figure 24: Results of logistic regression analysis after adjusting for top effects, linkage disequilibrium, and haplotypes present in the *TNIP1* region.** Logistic regression analysis was performed using Dataset 2 after imputation. Variants were chosen for adjustment in each logistic regression model based on their statistical significance within the meta-analysis. The most significant Sjögren’s syndrome-associated SNP in the meta-analysis (and Dataset 2) was rs6579837 (**a**). Adjusting for rs6579837 accounted for all the association in the region with the peak residual association at rs1862364 ( $P_{residual}=1.83\times 10^{-3}$ ), which was not associated with Sjögren’s syndrome in the single marker analysis (**b**). The pairwise  $D'$  (**c**) and  $r^2$  (**d**) for the top variants are illustrated, and the haplotypes with haplotype frequency >1% are displayed (**e**).

**Supplementary Figure 25: Genomic features from data tracks in the UCSC Genome Browser in the region around *TNIP1*.**

**NOTE: Figure presented on next page.**

**Supplementary Figure 25:** This figure presents genomic features found within various data tracks obtained from the UCSC Genome Browser for the region of Chr5 150.427-150.465 Mb (hg19), which encompasses the gene *TNIP1*. Variants presented surpassed suggestive association ( $P < 5 \times 10^{-5}$ ) threshold. Meta-analysis association results are presented as a Manhattan plot, where  $-\log(P_{meta})$  is presented in the y-axis and suggestive and genome-wide significance ( $P < 5 \times 10^{-8}$ ) thresholds are represented as a solid line and a dashed line, respectively. Genomic boundaries were selected to encompass not only significant associations, but also the diminishing association signals on either side of the strongest associations. Statistically significant results for eQTL (FDR adjusted  $P$  value  $< 0.05$ ) are displayed as  $-\log(P)$ , with the solid line representing a threshold of  $P < 0.05$ .

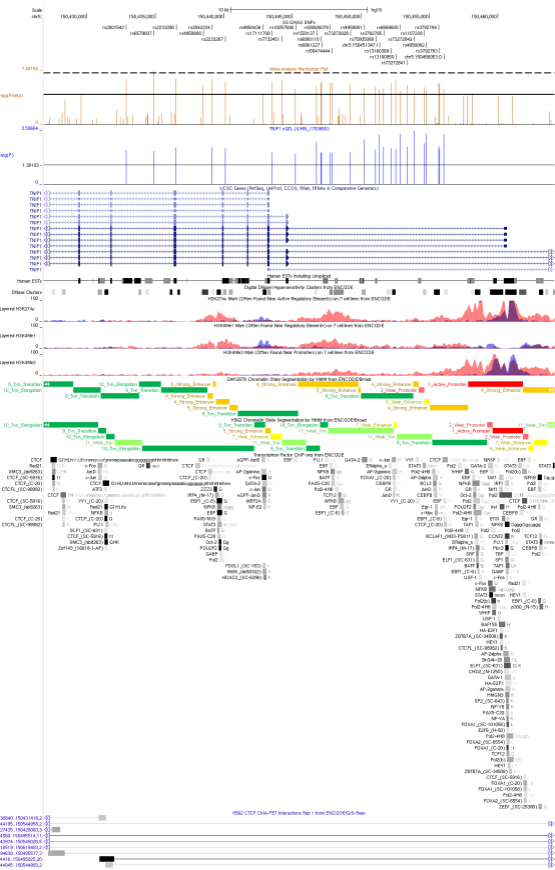

**Supplementary Figure 26: Indirect protein-protein interaction network created in DAPPLE using non-HLA variants achieving genome-wide significance.**

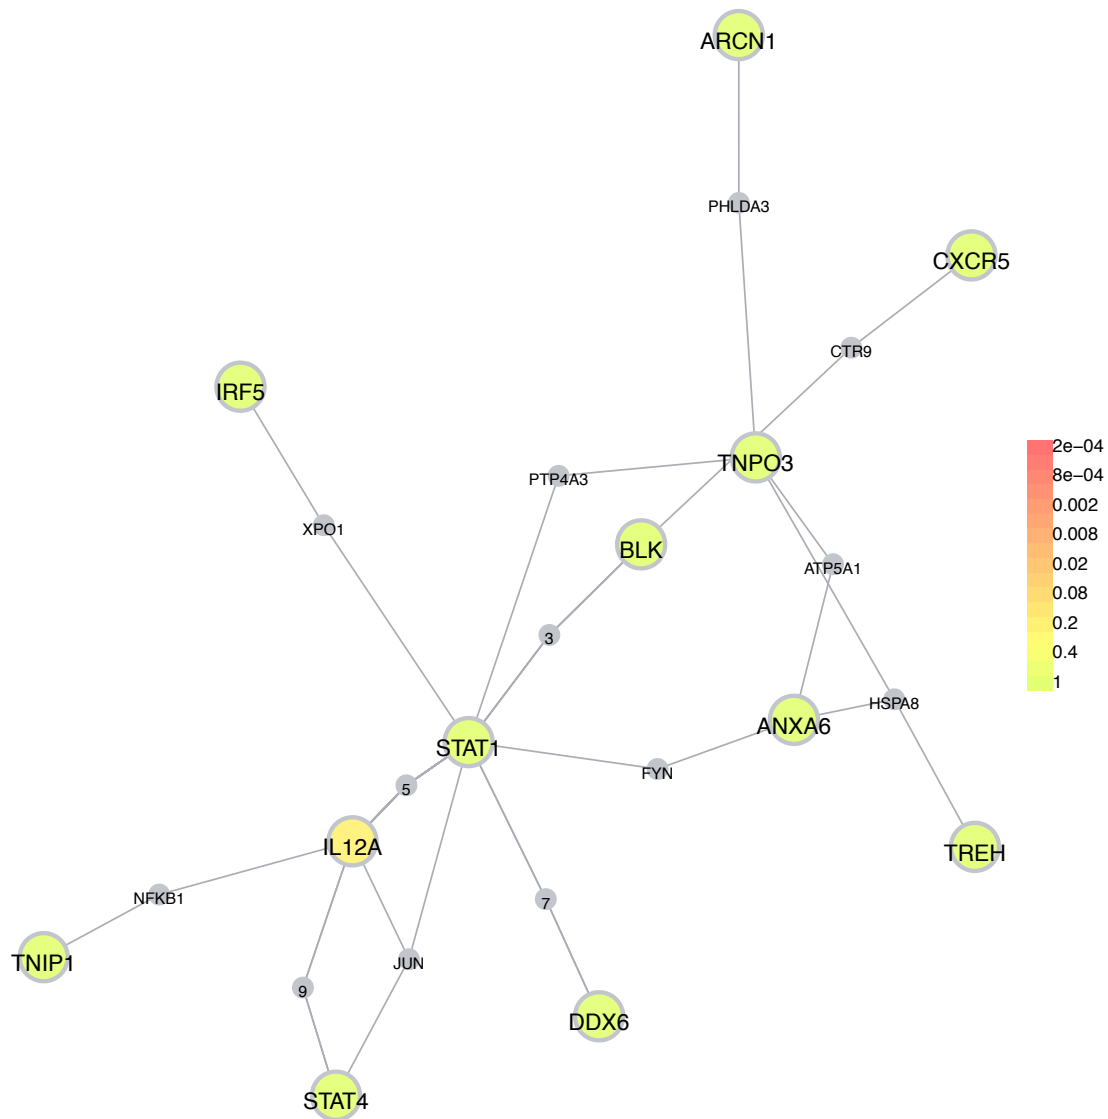

**Supplementary Figure 26:** This figure presents the indirect protein-protein interaction (PPI) network generated with DAPPLE and using only those input variants outside the HLA that achieved genome-wide significance ( $P < 5 \times 10^{-8}$ ). The color of the gene indicates the significance of participation in this PPI network. None of the indirect connections shown are more likely than expected by chance.

**Supplementary Figure 27: Direct protein-protein interaction network created in DAPPLE using non-HLA variants demonstrating genome-wide or suggestive association.**

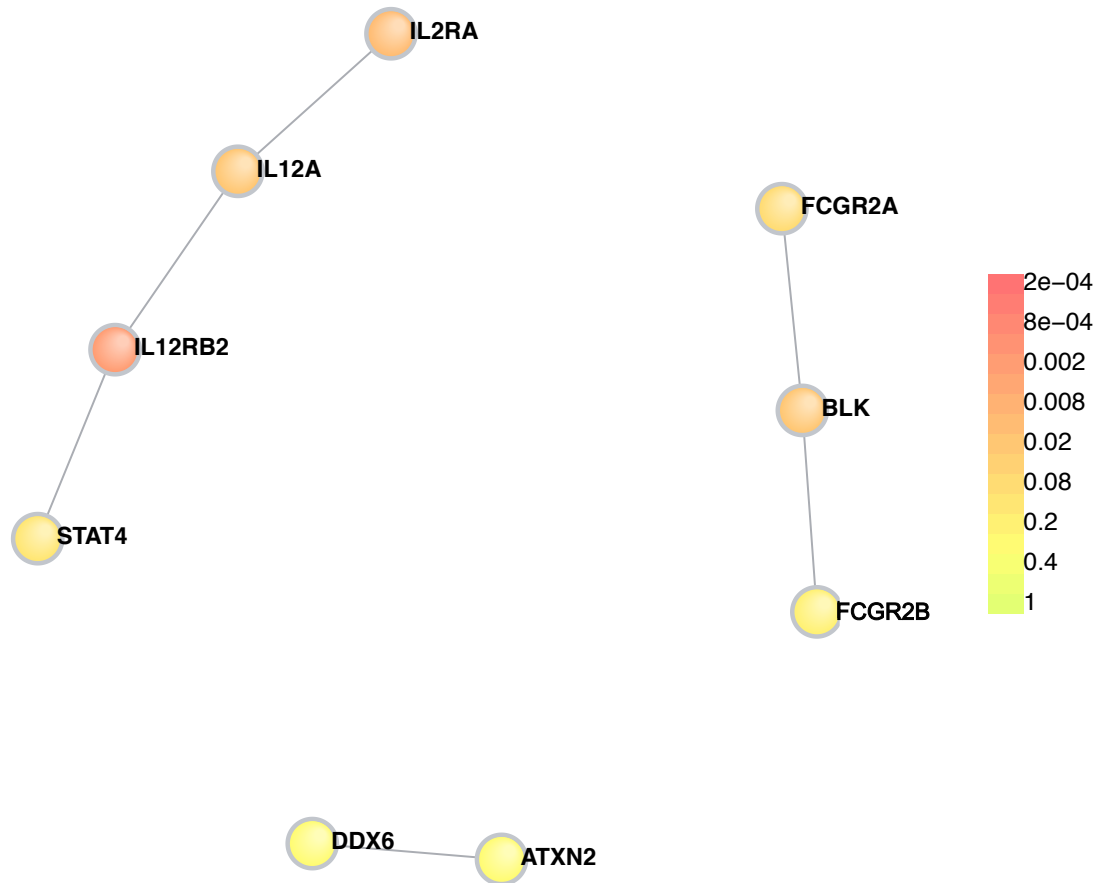

**Supplementary Figure 27:** This figure presents the direct protein-protein interaction (PPI) network created with DAPPLE and using as input variants outside the HLA that achieved suggestive association ( $P < 5 \times 10^{-5}$ ) in addition to those that achieved genome-wide significance ( $P < 5 \times 10^{-8}$ ). The color of the gene indicates the significance of participation in this PPI network. Here, we observed a direct PPI network consisting of 9 proteins with 6 direct interactions ( $P = 0.0007$ ) and mean associated protein direct connectivity of 1.33 (expected=0.63,  $P = 0.048$ ).

**Supplementary Figure 28: Indirect protein-protein interaction network created in DAPPLE using non-HLA variants demonstrating genome-wide or suggestive association.**

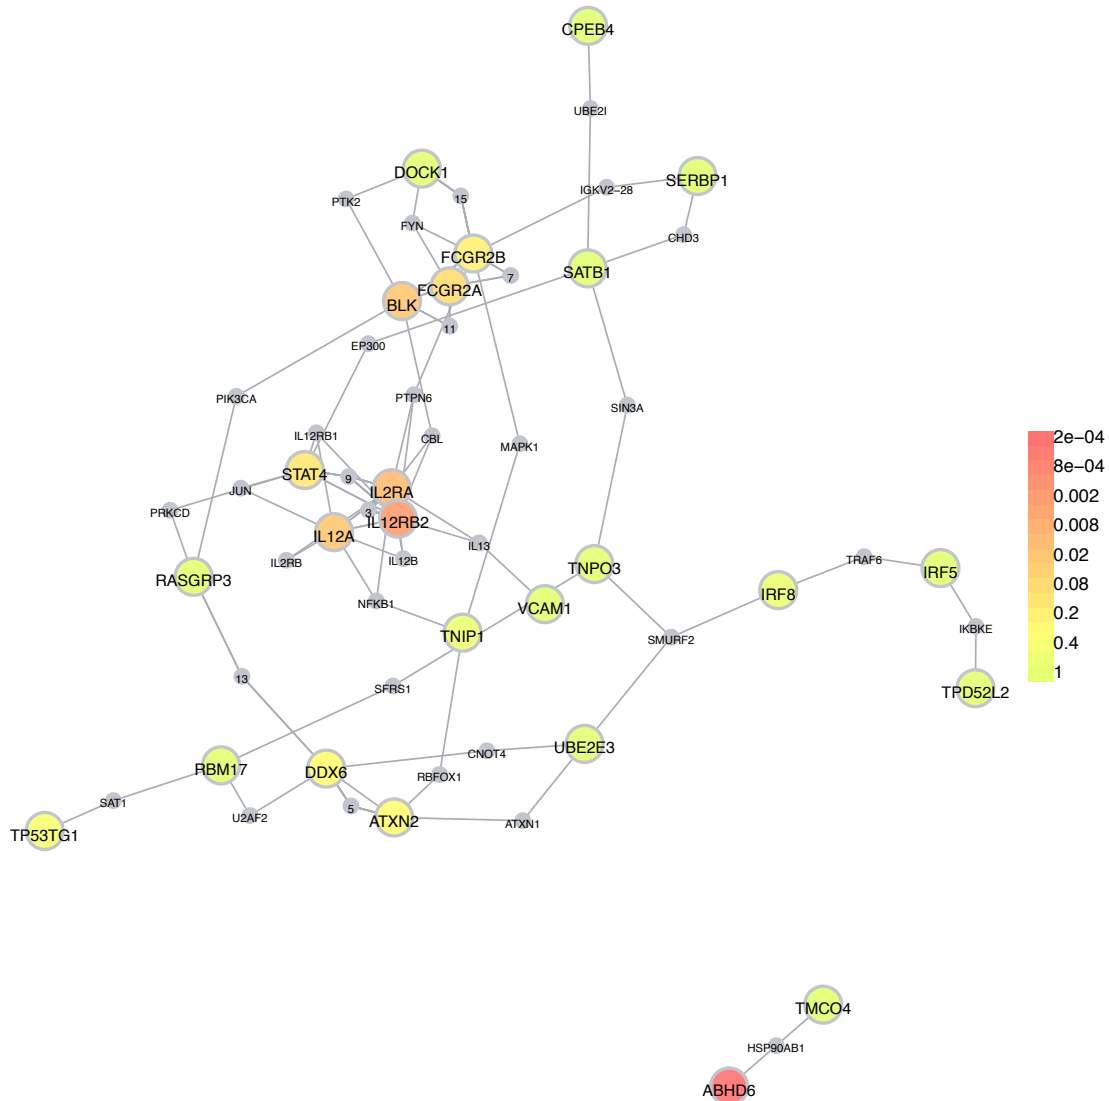

**Supplementary Figure 28:** This figure presents the indirect protein-protein interaction (PPI) network created with DAPPLE and using as input variants outside the HLA that achieved suggestive association ( $P < 5 \times 10^{-5}$ ) in addition to those that achieved genome-wide significance ( $P < 5 \times 10^{-8}$ ). The color of the gene indicates the significance of participation in this PPI network. This indirect network has a mean associated protein indirect connectivity trending toward significance ( $P = 0.082$ )

**Supplementary Figure 29: Forest plot of odds ratios for significantly associated loci within the HLA in Sjögren’s syndrome and various autoimmune disorders.**

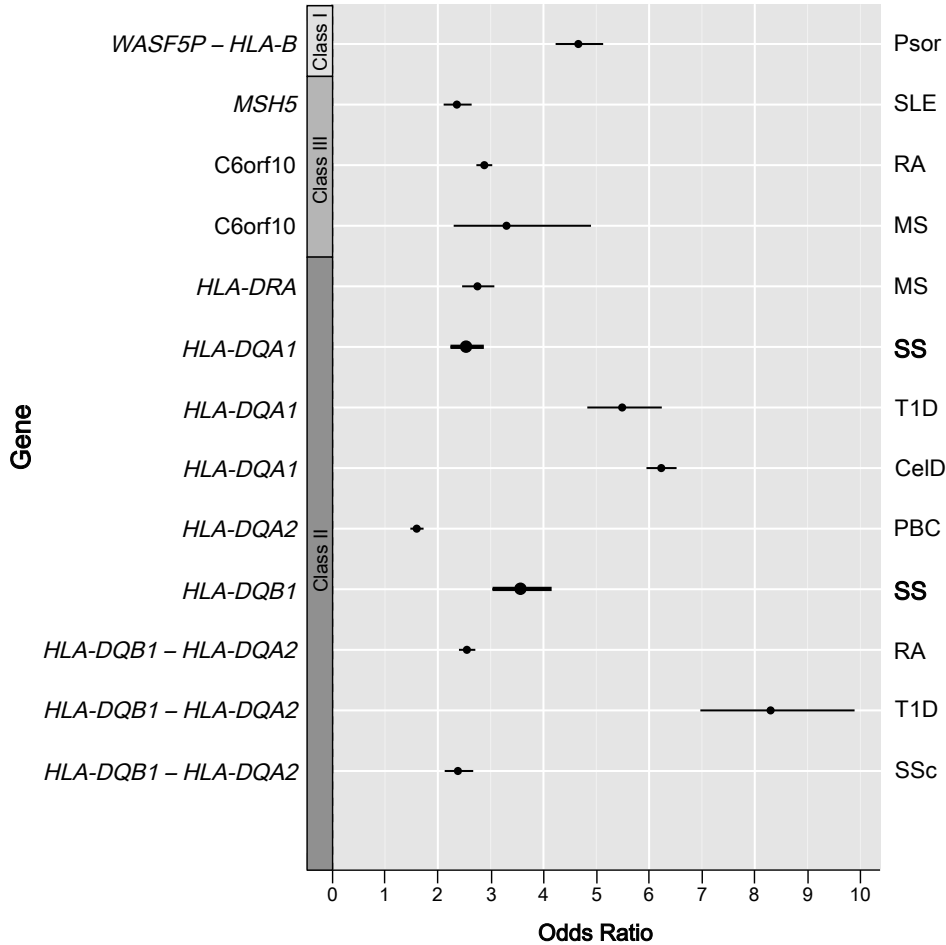

**Supplementary Figure 29:** Forest plot of odds ratios (ORs) with the 95% confidence intervals for variants within the region of the HLA in various autoimmune disorders. OR data for Sjögren’s syndrome -associated variants were obtained from this study, while ORs for other phenotypes were obtained through the catalog of GWAS-publications from the National Human Genome Research Institute ([www.genome.gov/GWASudies](http://www.genome.gov/GWASudies)). Odds ratios for Sjögren’s syndrome-associated variants identified in this study are bolded. Detailed information regarding the ORs presented in this figure can be found in Supplementary Table 15. Abbreviations used in this figure: Sjögren’s syndrome (SS); multiple sclerosis (MS); celiac disease (CeID); psoriasis (Psor); primary biliary cirrhosis (PBC); rheumatoid arthritis (RA); systemic lupus erythematosus (SLE); systemic sclerosis (SSc); type 1 diabetes (T1D).



**Supplementary Figure 30: Forest plot of odds ratios for significantly associated loci outside of the HLA in Sjögren’s syndrome and various autoimmune disorders.**

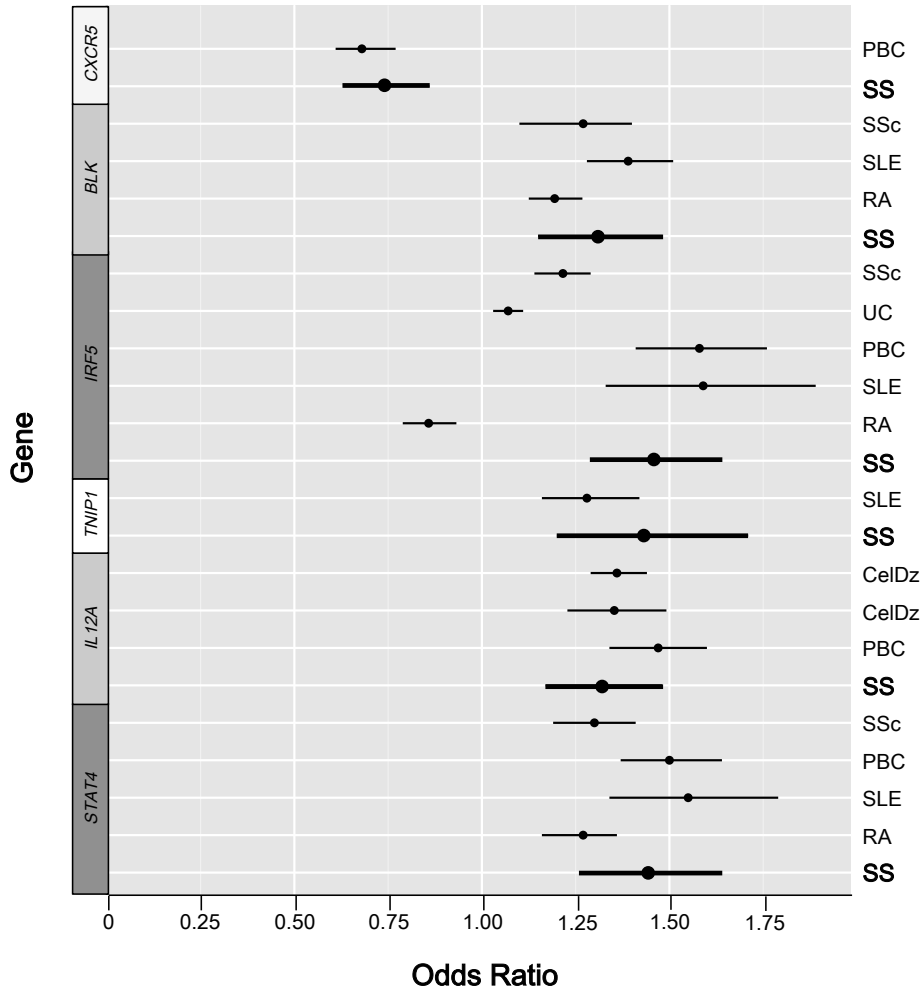

**Supplementary Figure 30:** Forest plot of odds ratios (ORs) with the 95% confidence intervals for significantly associated loci outside the HLA in Sjögren’s syndrome and various autoimmune disorders. For loci surpassing GWS, the peak effect at each locus was identified, strongly correlated variants ( $r^2 > 0.8$ ) were determined, and literature mining was used to determine whether or not the peak variants or their correlated variants had been previously described in other autoimmune diseases. Odds ratios for Sjögren’s syndrome-associated variants identified in this study are bolded. Detailed information regarding the variants, including the ORs and  $p$ -values, used in this figure can be found in Supplementary Table 14. Abbreviations used in this figure: Sjögren’s syndrome (SS); celiac disease (CeID); primary biliary cirrhosis (PBC); rheumatoid arthritis (RA); ulcerative colitis (UC); systemic lupus erythematosus (SLE); systemic sclerosis (SSc).

**Supplementary Figure 31: Plots of PC2 vs. PC1 from the principle component analyses (PCA) for Dataset 1 and Dataset 2.**

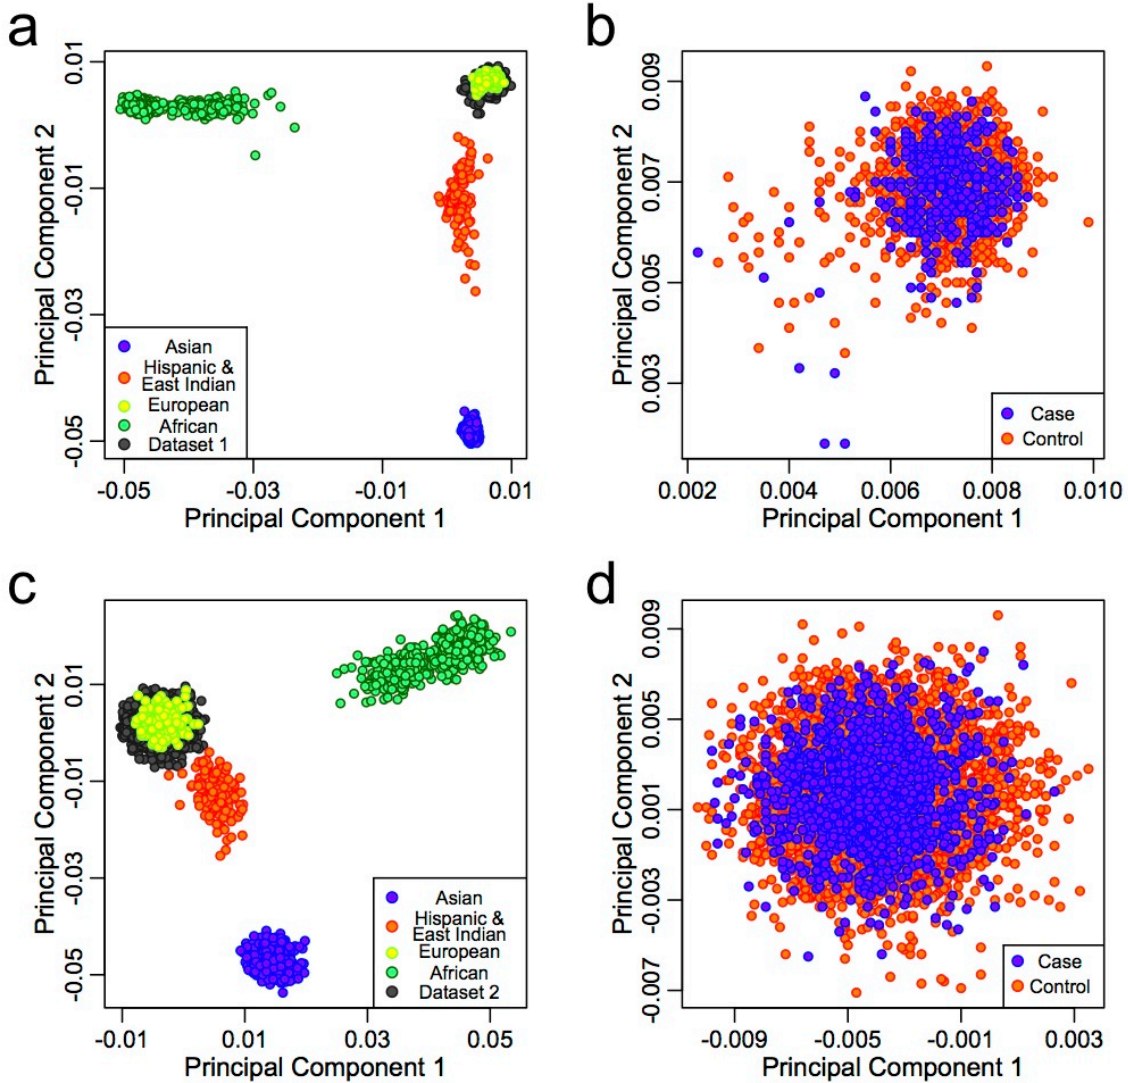

**Supplementary Figure 31: Plots of PC2 vs. PC1 from the principle component analyses (PCA) for Dataset 1 and Dataset 2. PCA was performed using the HapMap populations along with the Dataset 1 (a) and the Dataset 2(b) samples. Zoomed figures with subjects used in the final analyses in Dataset 1 (c) and Dataset 2 (d) after QC are shown.**

**Supplementary Table 1: Sjögren's syndrome loci previously implicated in candidate gene studies and established in the current study.**

| Chromosome | Locus of Interest | Phenotype Studied        | No. of Cases | No. of Controls | P-value   | Odds Ratio | Publication Referenced                                  |
|------------|-------------------|--------------------------|--------------|-----------------|-----------|------------|---------------------------------------------------------|
| 2          | STAT4             | SS                       | 120          | 1112            | 0.01      | 1.47       | Korman et al. Genes Immun 2008;9(3):267.                |
|            |                   | SS                       | 368          | 711             | 0.0014    | 1.41       | Nordmark et al. Genes Immun 2009;10:68.                 |
|            |                   | SS                       | 540          | 532             | 0.0007    | 1.4        | Nordmark et al. Genes Immun 2011;12:100.                |
|            |                   | anti-Ro or anti-La in SS | 391          | 532             | 0.00069   | 1.44       | Nordmark et al. Genes Immun 2011;12:100.                |
| 7          | IRF5              | SS                       | 210          | 154             | 0.01      | 1.93       | Miceli-Richard et al. Arthritis Rheum 2007;56(12):3989. |
|            |                   | SS                       | 368          | 711             | 0.000024  | 1.49       | Nordmark et al. Genes Immun 2009;10:68.                 |
|            |                   | SS                       | 368          | 711             | 0.00032   | 1.57       | Nordmark et al. Genes Immun 2009;10:68.                 |
| 7          | IRF-5 / TNPO3     | SS                       | 540          | 532             | 0.0000055 | 1.7        | Nordmark et al. Genes Immun 2011;12:100.                |
|            |                   | anti-Ro or anti-La in SS | 391          | 532             | 0.0000017 | 1.81       | Nordmark et al. Genes Immun 2011;12:100.                |
| 8          | FAM167A-BLK       | SS                       | 540          | 532             | 0.00047   | 1.37       | Nordmark et al. Genes Immun 2011;12:100.                |
|            |                   | anti-Ro or anti-La in SS | 391          | 532             | 0.00082   | 1.4        | Nordmark et al. Genes Immun 2011;12:100.                |

**Supplementary Table 2: Summary of study samples contributed by each site.**

| Sample contribution site                                           | Samples contributed | Samples after QC |                      |             |                      |             |                      |             |             |
|--------------------------------------------------------------------|---------------------|------------------|----------------------|-------------|----------------------|-------------|----------------------|-------------|-------------|
|                                                                    |                     | Dataset 1        |                      | Dataset 2   |                      | Dataset 3   |                      | Dataset 4   |             |
|                                                                    |                     | Case             | Control <sup>a</sup> | Case        | Control <sup>b</sup> | Case        | Control <sup>b</sup> | Case        | Control     |
| Oklahoma Medical Research Foundation (OMRF), USA                   | 254                 | 143              | 3                    | 61          | 2                    | 91          | 2                    | 159         | 5           |
| University of Minnesota, USA                                       | 192                 | 123              | 20                   | 3           | 23                   | 3           | 23                   | 53          | 41          |
| Newcastle University, United Kingdom                               | 438                 | 129              | 0                    | 156         | 2                    | 230         | 0                    | 290         | 5           |
| ACCESS Research Group / Henry Ford Health System, USA              | 379                 | -                | 194                  | -           | 140                  | -           | 138                  | -           | -           |
| King's College London, United Kingdom                              | 195                 | -                | 124                  | -           | 70                   | -           | 70                   | -           | -           |
| Illumina iControl, USA                                             | 267                 | -                | 37                   | -           | 111                  | -           | 111                  | -           | -           |
| NIH dbGaP, USA                                                     | 4184                | -                | 1597                 | -           | 1805                 | -           | 1808                 | -           | -           |
| Université Paris-Sud, France                                       | 382                 | -                | -                    | 285         | -                    | 222         | -                    | 280         | -           |
| Uppsala University Hospital, Sweden                                | 1344                | -                | -                    | 163         | 1006                 | 164         | 109                  | 163         | 999         |
| The Queen Elizabeth Hospital and University of Adelaide, Australia | 265                 | -                | -                    | 122         | 75                   | 119         | 66                   | 121         | 74          |
| University of Bergen, Norway                                       | 278                 | -                | -                    | 114         | 134                  | 117         | 133                  | 119         | 132         |
| Hannover Medical School, Germany                                   | 258                 | -                | -                    | 111         | 105                  | 83          | 25                   | 121         | 74          |
| National Institutes of Health, USA                                 | 144                 | -                | -                    | 105         | -                    | 17          | -                    | 113         | -           |
| Karolinska Institute, Sweden                                       | 183                 | -                | -                    | 65          | 62                   | 63          | 61                   | 65          | 51          |
| Stavanger University Hospital, Norway                              | 144                 | -                | -                    | 58          | 52                   | 49          | 49                   | 57          | 50          |
| OMRF / Lupus Family Registry and Repository, USA                   | 1054                | -                | -                    | -           | 658                  | -           | 356                  | -           | 661         |
| OMRF / Oklahoma Rheumatic Disease Research Cores Center, USA       | 744                 | -                | -                    | -           | 534                  | -           | 120                  | -           | 542         |
| <b>Overall</b>                                                     | <b>10705</b>        | <b>395</b>       | <b>1975</b>          | <b>1243</b> | <b>4779</b>          | <b>1158</b> | <b>3071</b>          | <b>1541</b> | <b>2634</b> |

a. Each case was genetically matched to 5 controls

b. Remaining controls typed on Omni1 arrays were used in the replication phase

Supplementary Table 3. Association analysis in HLA

| SNP             | BP       | Alleles   |      | MAF     |             | Observed or Imputed in Dataset1/2 | Dataset 1 |                  | Dataset 2 |                | Test of heterogeneity |                  | Meta analysis |   |
|-----------------|----------|-----------|------|---------|-------------|-----------------------------------|-----------|------------------|-----------|----------------|-----------------------|------------------|---------------|---|
|                 |          | maj / min | Case | Control | OR (95% CI) |                                   | P         | OR (95% CI)      | P         | P <sub>Q</sub> | I <sup>2</sup>        | OR (95% CI)      | P             |   |
|                 |          |           |      |         |             |                                   |           |                  |           |                |                       |                  |               |   |
| rs112357081     | 32419276 | TCTAA/T   | 0.59 | 0.33    | I / -       | 2.89 (2.43-3.44)                  | 1.01E-32  | -                | -         | -              | -                     | -                | -             | - |
| rs114138262     | 32315511 | T/G       | 0.28 | 0.10    | - / I       | -                                 | -         | 3.64 (3.21-4.13) | 2.68E-90  | -              | -                     | -                | -             | - |
| rs4143332       | 31348365 | G/A       | 0.28 | 0.12    | - / O       | -                                 | -         | 3.30 (2.91-3.73) | 2.37E-80  | -              | -                     | -                | -             | - |
| rs115575857     | 32659645 | A/G       | 0.29 | 0.12    | I / I       | 3.25 (2.61-4.05)                  | 4.10E-26  | 3.65 (3.22-4.14) | 3.70E-90  | 0.38           | 0                     | 3.53 (3.03-4.11) | 7.65E-114     |   |
| rs389884        | 31940897 | A/G       | 0.28 | 0.11    | I / O       | 3.69 (2.95-4.60)                  | 7.74E-31  | 3.47 (3.06-3.94) | 2.49E-84  | 0.64           | 0                     | 3.53 (3.03-4.11) | 2.83E-113     |   |
| rs3135394       | 32408497 | A/G       | 0.27 | 0.11    | I / O       | 3.52 (2.83-4.38)                  | 2.47E-29  | 3.52 (3.10-3.99) | 1.14E-85  | 1.00           | 0                     | 3.52 (3.02-4.10) | 5.22E-113     |   |
| rs558702        | 31870326 | G/A       | 0.28 | 0.11    | I / O       | 3.58 (2.87-4.46)                  | 6.33E-30  | 3.46 (3.06-3.92) | 6.78E-85  | 0.80           | 0                     | 3.49 (3.00-4.07) | 7.06E-113     |   |
| rs1270942       | 31918860 | A/G       | 0.28 | 0.11    | O / O       | 3.63 (2.91-4.52)                  | 1.32E-30  | 3.46 (3.05-3.92) | 4.66E-84  | 0.71           | 0                     | 3.50 (3.01-4.08) | 9.14E-113     |   |
| rs519417        | 31878433 | G/A       | 0.28 | 0.11    | I / O       | 3.59 (2.88-4.46)                  | 3.19E-30  | 3.45 (3.05-3.91) | 3.14E-84  | 0.76           | 0                     | 3.49 (3.00-4.06) | 1.54E-112     |   |
| rs115549526     | 31626013 | C/T       | 0.28 | 0.11    | I / I       | 3.66 (2.93-4.56)                  | 1.92E-30  | 3.44 (3.04-3.90) | 5.96E-84  | 0.65           | 0                     | 3.50 (3.01-4.08) | 1.71E-112     |   |
| rs3132450       | 31596138 | A/G       | 0.28 | 0.11    | I / O       | 3.66 (2.93-4.56)                  | 1.35E-30  | 3.44 (3.03-3.89) | 1.29E-83  | 0.63           | 0                     | 3.50 (3.00-4.07) | 2.55E-112     |   |
| rs2395149       | 32325562 | G/A       | 0.27 | 0.11    | I / O       | 3.49 (2.80-4.35)                  | 9.75E-29  | 3.55 (3.13-4.03) | 1.37E-85  | 0.90           | 0                     | 3.54 (3.03-4.12) | 2.70E-112     |   |
| rs497309        | 31892484 | A/C       | 0.28 | 0.11    | O / O       | 3.58 (2.88-4.46)                  | 4.08E-30  | 3.45 (3.05-3.91) | 4.25E-84  | 0.77           | 0                     | 3.49 (3.00-4.06) | 2.70E-112     |   |
| rs3117574       | 31725230 | G/A       | 0.28 | 0.11    | O / O       | 3.61 (2.90-5.40)                  | 3.35E-30  | 3.43 (3.02-3.88) | 8.85E-84  | 0.68           | 0                     | 3.48 (2.99-4.05) | 4.50E-112     |   |
| rs3129716       | 32657436 | T/C       | 0.29 | 0.12    | I / O       | 3.29 (2.66-4.09)                  | 2.11E-27  | 3.51 (3.10-3.97) | 7.74E-87  | 0.62           | 0                     | 3.45 (2.97-4.00) | 4.59E-112     |   |
| rs915652        | 31749142 | G/A       | 0.28 | 0.11    | I / O       | 3.72 (2.98-4.64)                  | 3.69E-31  | 3.42 (3.02-3.88) | 1.16E-82  | 0.52           | 0                     | 3.50 (3.01-4.08) | 5.80E-112     |   |
| rs139789464     | 31624864 | A/G       | 0.28 | 0.11    | I / I       | 3.66 (2.93-4.57)                  | 1.94E-30  | 3.44 (3.03-3.89) | 2.09E-83  | 0.62           | 0                     | 3.50 (3.00-4.07) | 5.93E-112     |   |
| rs3117582       | 31620520 | T/G       | 0.28 | 0.11    | I / O       | 3.66 (2.93-4.56)                  | 1.37E-30  | 3.43 (3.03-3.89) | 4.46E-83  | 0.62           | 0                     | 3.49 (3.00-4.07) | 8.75E-112     |   |
| rs3132971       | 32230256 | T/G       | 0.27 | 0.11    | I / O       | 3.49 (2.80-4.35)                  | 9.75E-29  | 3.53 (3.11-4.00) | 5.58E-85  | 0.94           | 0                     | 3.52 (3.02-4.10) | 1.06E-111     |   |
| rs3130484       | 31715882 | T/C       | 0.28 | 0.11    | O / O       | 3.60 (2.88-4.48)                  | 4.78E-30  | 3.41 (3.01-3.86) | 3.52E-83  | 0.68           | 0                     | 3.46 (2.97-4.02) | 2.53E-111     |   |
| rs9267531       | 31636742 | A/G       | 0.27 | 0.11    | I / O       | 3.65 (2.93-4.56)                  | 1.48E-30  | 3.42 (3.02-3.87) | 2.05E-82  | 0.61           | 0                     | 3.48 (2.99-4.06) | 4.26E-111     |   |
| rs2854275       | 32628428 | C/A       | 0.29 | 0.12    | O / O       | 3.24 (2.61-4.02)                  | 9.59E-27  | 3.52 (3.11-3.99) | 1.42E-86  | 0.51           | 0                     | 3.44 (2.96-4.00) | 4.43E-111     |   |
| rs114913832     | 32626484 | T/C       | 0.29 | 0.12    | I / I       | 3.27 (2.63-4.05)                  | 3.87E-27  | 3.48 (3.07-3.94) | 7.15E-86  | 0.62           | 0                     | 3.42 (2.94-3.97) | 7.78E-111     |   |
| rs3131379       | 31721033 | G/A       | 0.28 | 0.11    | O / O       | 3.58 (2.88-4.46)                  | 6.29E-30  | 3.40 (3.00-3.85) | 8.83E-83  | 0.68           | 0                     | 3.45 (2.96-4.01) | 8.33E-111     |   |
| rs775397        | 32261252 | T/G       | 0.27 | 0.11    | I / O       | 3.49 (2.80-4.35)                  | 1.28E-28  | 3.53 (3.11-4.01) | 4.31E-84  | 0.93           | 0                     | 3.52 (3.02-4.10) | 1.03E-110     |   |
| rs3101017       | 31733466 | T/C       | 0.28 | 0.11    | I / I       | 3.58 (2.88-4.46)                  | 6.29E-30  | 3.39 (3.00-3.84) | 1.19E-82  | 0.68           | 0                     | 3.45 (2.96-4.01) | 1.11E-110     |   |
| rs3131383       | 31704294 | G/T       | 0.28 | 0.11    | O / O       | 3.59 (2.88-4.48)                  | 5.91E-30  | 3.39 (3.00-3.84) | 1.54E-82  | 0.66           | 0                     | 3.45 (2.96-4.01) | 1.35E-110     |   |
| rs3117575       | 31726253 | T/C       | 0.28 | 0.11    | O / O       | 3.57 (2.87-4.45)                  | 8.62E-30  | 3.41 (3.01-3.86) | 1.23E-82  | 0.72           | 0                     | 3.45 (2.97-4.02) | 1.60E-110     |   |
| rs3117577       | 31727474 | A/G       | 0.28 | 0.11    | O / O       | 3.58 (2.88-4.46)                  | 6.29E-30  | 3.39 (3.00-3.84) | 2.06E-82  | 0.67           | 0                     | 3.44 (2.96-4.01) | 1.91E-110     |   |
| rs114320488     | 32659609 | T/C       | 0.29 | 0.12    | I / I       | 3.25 (2.61-4.05)                  | 4.10E-26  | 3.52 (3.10-3.98) | 2.52E-86  | 0.55           | 0                     | 3.44 (2.96-4.00) | 3.60E-110     |   |
| rs3117573       | 31718396 | C/G       | 0.28 | 0.11    | I / I       | 3.60 (2.89-4.48)                  | 4.69E-30  | 3.38 (2.98-3.83) | 7.42E-82  | 0.63           | 0                     | 3.44 (2.96-4.00) | 4.99E-110     |   |
| rs3115671       | 31734345 | G/T       | 0.27 | 0.11    | I / O       | 3.58 (2.87-4.46)                  | 8.47E-30  | 3.40 (3.00-3.85) | 5.26E-82  | 0.69           | 0                     | 3.45 (2.96-4.01) | 6.54E-110     |   |
| rs1794282       | 32666526 | C/T       | 0.27 | 0.11    | I / O       | 3.62 (2.90-4.51)                  | 5.07E-30  | 3.50 (3.08-3.98) | 4.91E-81  | 0.80           | 0                     | 3.53 (3.02-4.12) | 3.51E-109     |   |
| rs114702065     | 31808436 | C/T       | 0.27 | 0.11    | I / I       | 3.53 (2.82-4.41)                  | 2.19E-28  | 3.44 (3.03-3.90) | 1.06E-82  | 0.84           | 0                     | 3.46 (2.97-4.04) | 4.02E-109     |   |
| rs141268612     | 31832038 | A/G       | 0.27 | 0.11    | I / I       | 3.54 (2.84-4.42)                  | 7.57E-29  | 3.44 (3.03-3.90) | 6.57E-82  | 0.82           | 0                     | 3.47 (2.97-4.04) | 8.04E-109     |   |
| rs141597299     | 31810612 | C/T       | 0.27 | 0.11    | I / I       | 3.52 (2.82-4.41)                  | 2.43E-28  | 3.44 (3.03-3.90) | 2.24E-82  | 0.85           | 0                     | 3.46 (2.97-4.04) | 9.39E-109     |   |
| rs116099232     | 31754830 | T/C       | 0.27 | 0.11    | I / I       | 3.56 (2.85-4.43)                  | 2.67E-29  | 3.38 (2.98-3.83) | 5.55E-81  | 0.70           | 0                     | 3.43 (2.94-3.99) | 2.20E-108     |   |
| chr6:31767673:1 | 31767673 | T/TA      | 0.27 | 0.11    | I / I       | 3.57 (2.86-4.46)                  | 5.48E-29  | 3.38 (2.98-3.84) | 6.26E-81  | 0.68           | 0                     | 3.43 (2.95-4.00) | 5.14E-108     |   |
| rs2734583       | 31505480 | A/G       | 0.28 | 0.11    | I / O       | 3.32 (2.68-4.11)                  | 2.81E-28  | 3.29 (2.91-3.72) | 1.36E-80  | 0.94           | 0                     | 3.30 (2.84-3.82) | 6.19E-107     |   |
| rs115146037     | 31434331 | A/T       | 0.28 | 0.12    | I / I       | 3.40 (2.74-4.24)                  | 3.26E-28  | 3.25 (2.88-3.68) | 8.60E-80  | 0.72           | 0                     | 3.30 (2.84-3.83) | 4.39E-106     |   |
| rs3094013       | 31434366 | G/A       | 0.28 | 0.12    | I / O       | 3.39 (2.72-4.21)                  | 5.68E-28  | 3.27 (2.89-3.70) | 4.71E-80  | 0.79           | 0                     | 3.30 (2.84-3.84) | 4.64E-106     |   |
| rs114659560     | 31317063 | A/G       | 0.28 | 0.12    | I / I       | 3.46 (2.77-4.30)                  | 1.34E-28  | 3.23 (2.86-3.65) | 1.31E-78  | 0.60           | 0                     | 3.29 (2.83-3.82) | 2.51E-105     |   |
| rs115377772     | 31317065 | T/C       | 0.28 | 0.12    | I / I       | 3.46 (2.77-4.30)                  | 1.34E-28  | 3.23 (2.86-3.65) | 1.31E-78  | 0.60           | 0                     | 3.29 (2.83-3.82) | 2.51E-105     |   |
| rs114397575     | 31316448 | T/A       | 0.28 | 0.12    | I / I       | 3.47 (2.79-4.33)                  | 1.04E-28  | 3.23 (2.86-3.65) | 1.95E-78  | 0.57           | 0                     | 3.30 (2.84-3.83) | 2.86E-105     |   |
| rs115724794     | 31316520 | G/A       | 0.28 | 0.12    | I / I       | 3.46 (2.78-4.31)                  | 1.32E-28  | 3.23 (2.86-3.65) | 1.95E-78  | 0.59           | 0                     | 3.29 (2.83-3.83) | 3.65E-105     |   |
| rs116684188     | 31316613 | G/A       | 0.28 | 0.12    | I / I       | 3.45 (2.77-4.30)                  | 1.66E-28  | 3.23 (2.86-3.65) | 1.95E-78  | 0.60           | 0                     | 3.29 (2.83-3.82) | 4.64E-105     |   |
| rs3131618       | 31434621 | A/G       | 0.28 | 0.12    | I / O       | 3.41 (2.74-4.24)                  | 3.57E-28  | 3.23 (2.86-3.65) | 1.71E-78  | 0.67           | 0                     | 3.28 (2.82-3.81) | 9.03E-105     |   |
| rs116423149     | 31434520 | G/C       | 0.28 | 0.12    | I / I       | 3.34 (2.69-4.14)                  | 1.12E-27  | 3.22 (2.85-3.64) | 5.37E-79  | 0.78           | 0                     | 3.25 (2.80-3.77) | 9.73E-105     |   |
| rs114272716     | 31314652 | A/G       | 0.28 | 0.12    | I / I       | 3.41 (2.73-4.25)                  | 1.28E-27  | 3.25 (2.87-3.67) | 9.55E-79  | 0.71           | 0                     | 3.29 (2.83-3.83) | 1.92E-104     |   |
| rs112809350     | 31312492 | A/G       | 0.28 | 0.12    | I / I       | 3.38 (2.71-4.22)                  | 4.76E-27  | 3.25 (2.87-3.67) | 2.55E-78  | 0.76           | 0                     | 3.28 (2.82-3.82) | 2.00E-103     |   |
| rs116385615     | 31881309 | T/C       | 0.31 | 0.14    | I / I       | 3.06 (2.49-3.76)                  | 2.46E-26  | 3.03 (2.70-3.41) | 3.58E-77  | 0.95           | 0                     | 3.04 (2.64-3.50) | 1.52E-101     |   |
| rs3099844       | 31448976 | C/A       | 0.28 | 0.12    | I / O       | 3.24 (2.62-4.02)                  | 4.44E-27  | 3.10 (2.75-3.50) | 2.43E-75  | 0.72           | 0                     | 3.14 (2.71-3.64) | 1.55E-100     |   |
| rs3132510       | 31172151 | T/C       | 0.26 | 0.11    | I / O       | 3.41 (2.73-4.24)                  | 9.75E-28  | 3.19 (2.81-3.61) | 9.20E-74  | 0.61           | 0                     | 3.25 (2.79-3.78) | 1.16E-99      |   |
| rs115759691     | 31313722 | C/T       | 0.28 | 0.12    | I / I       | 3.29 (2.64-4.11)                  | 5.05E-26  | 3.17 (2.80-3.58) | 2.11E-75  | 0.77           | 0                     | 3.20 (2.75-3.72) | 1.72E-99      |   |
| rs3130557       | 31094703 | C/T       | 0.28 | 0.12    | O / O       | 3.38 (2.72-4.21)                  | 4.63E-28  | 3.04 (2.69-3.43) | 5.31E-73  | 0.40           | 0                     | 3.13 (2.70-3.63) | 3.05E-99      |   |
| rs114528009     | 31312941 | C/T       | 0.28 | 0.12    | I / I       | 3.20 (2.56-3.99)                  | 6.61E-25  | 3.20 (2.83-3.62) | 3.16E-76  | 1.00           | 0                     | 3.20 (2.75-3.72) | 3.89E-99      |   |
| rs3130985       | 31085356 | C/T       | 0.28 | 0.12    | I / I       | 3.32 (2.66-4.15)                  | 6.53E-26  | 3.10 (2.74-3.50) | 3.52E-74  | 0.59           | 0                     | 3.16 (2.72-3.67) | 3.33E-98      |   |
| rs3131788       | 31024796 | G/A       | 0.28 | 0.12    | I / O       | 3.31 (2.66-4.11)                  | 3.87E-27  | 3.04 (2.69-3.44) | 5.10E-72  | 0.51           | 0                     | 3.11 (2.68-3.61) | 2.51E-97      |   |
| rs116232857     | 32597064 | A/G       | 0.64 | 0.42    | I / I       | 2.83 (2.37-3.38)                  | 9.05E-31  | 2.42 (2.19-2.67) | 1.14E-67  | 0.13           | 57                    | 2.53 (2.24-2.86) | 1.33E-96      |   |
| rs3130562       | 31100974 | T/C       | 0.28 | 0.12    | I / I       | 3.25 (2.60-4.05)                  | 2.51E-25  | 3.08 (2.72-3.48) | 1.06E-72  | 0.68           | 0                     | 3.12 (2.69-3.63) | 3.85E-96      |   |
| rs111456260     | 31311449 | T/A       | 0.28 | 0.12    | I / I       | 3.18 (2.54-3.97)                  | 1.88E-24  | 3.15 (2.79-3.57) | 1.43E-73  | 0.95           | 0                     | 3.16 (2.72-3.67) | 4.63E-96      |   |
| rs114469371     | 32189921 | A/G       | 0.29 | 0.13    | I / I       | 2.89 (2.34-3.58)                  | 9.82E-23  | 3.01 (2.67-3.39) | 1.10E-72  | 0.76           | 0                     | 2.97 (2.57-3.44) | 2.46E-93      |   |
| rs3132956       | 32179438 | G/A       | 0.29 | 0.13    | I / O       | 2.96 (2.40-3.65)                  | 4.23E-24  | 2.97 (2.63-3.35) | 2.43E-70  | 0.98           | 0                     | 2.96 (2.56-3.43) | 1.64E-92      |   |
| rs3128987       | 31434198 | T/C       | 0.34 | 0.17    | I / O       | 2.71 (2.22-3.31)                  | 1.83E-22  | 2.72 (2.44-3.04) | 5.14E-71  | 0.98           | 0                     | 2.72 (2.37-3.11) | 2.13E-91      |   |
| rs114585692     | 32674643 | G/A       | 0.65 | 0.43    | O / I       | 3.03 (2.51-3.65)                  | 8.28E-31  | 2.27 (2.06-2.50) | 5.23E-61  | 0.01           | 86                    | 2.46 (2.17-2.78) | 9.95E-90      |   |
| rs144861668     | 32756653 | C/T       | 0.24 | 0.10    | I / I       | 3.12 (2.50-3.89)                  | 8.33E-24  | 3.15 (2.76-3.59) | 1.72E-66  | 0.94           | 0                     | 3.14 (2.69-3.67) | 1.94E-88      |   |
| rs693906        | 31835164 | G/C       | 0.29 | 0.13    | I / I       | 2.90 (2.35-3.57)                  | 4.11E-23  | 2.90 (2.57-3.27) | 3.14E-67  | 1.00           | 0                     | 2.90 (2.50-3.35) | 2.02E-88      |   |
| rs115688765     | 31433831 | A/G       | 0.34 | 0.17    | I / I       | 2.70 (2.21-3.30)                  | 3.43E-22  | 2.66 (2.39-2.98) | 4.90E-68  | 0.91           | 0                     | 2.67 (2.33-3.06) | 3.25E-88      |   |
| rs114720630     | 32751244 | C/T       | 0.24 | 0.10    | I / I       | 3.14 (2.51-3.92)                  | 5.16E-24  | 3.13 (2.75-3.57) | 8.44E-66  | 0.99           | 0                     | 3.13 (2.68-3.66) | 5.60E-88      |   |
| rs1150754       | 32050758 | C/T       | 0.31 | 0.15    | O / O       | 2.76 (2.25-3                      |           |                  |           |                |                       |                  |               |   |

**Supplementary Table 3.** Association analysis in HLA

| SNP             | BP       | Alleles   |      | MAF     |             | Observed or Imputed in Dataset1/2 | Dataset 1 |                  | Dataset 2 |                | Test of heterogeneity |                  | Meta analysis |  |
|-----------------|----------|-----------|------|---------|-------------|-----------------------------------|-----------|------------------|-----------|----------------|-----------------------|------------------|---------------|--|
|                 |          | maj / min | Case | Control | OR (95% CI) |                                   | P         | OR (95% CI)      | P         | P <sub>Q</sub> | I <sup>2</sup>        | OR (95% CI)      | P             |  |
|                 |          |           |      |         |             |                                   |           |                  |           |                |                       |                  |               |  |
| rs115645661     | 32752844 | A/G       | 0.24 | 0.10    | I/I         | 3.12 (2.50-3.89)                  | 8.37E-24  | 3.13 (2.75-3.57) | 8.04E-66  | 0.97           | 0                     | 3.13 (2.68-3.66) | 8.87E-88      |  |
| rs719655        | 32752333 | C/T       | 0.24 | 0.10    | I/I         | 3.10 (2.48-3.87)                  | 2.36E-23  | 3.13 (2.75-3.57) | 9.25E-66  | 0.94           | 0                     | 3.12 (2.67-3.65) | 2.98E-87      |  |
| rs115951480     | 32747790 | G/T       | 0.24 | 0.10    | I/I         | 3.10 (2.49-3.88)                  | 1.74E-23  | 3.12 (2.74-3.56) | 2.29E-65  | 0.96           | 0                     | 3.12 (2.67-3.65) | 5.27E-87      |  |
| rs67682613      | 31826705 | G/A       | 0.29 | 0.13    | I/I         | 2.83 (2.29-3.49)                  | 4.82E-22  | 2.87 (2.54-3.23) | 1.03E-66  | 0.91           | 0                     | 2.85 (2.47-3.30) | 8.70E-87      |  |
| rs1150755       | 32038550 | C/T       | 0.31 | 0.15    | O/O         | 2.73 (2.22-3.35)                  | 1.31E-21  | 2.73 (2.44-3.06) | 4.58E-67  | 1.00           | 0                     | 2.73 (2.37-3.14) | 1.19E-86      |  |
| rs145560043     | 31878495 | G/A       | 0.48 | 0.29    | I/I         | 2.67 (2.24-3.19)                  | 4.89E-28  | 2.32 (2.10-2.57) | 3.26E-60  | 0.18           | 46                    | 2.42 (2.14-2.73) | 2.19E-86      |  |
| rs114240894     | 32418710 | A/C       | 0.54 | 0.34    | I/I         | 2.82 (2.37-3.35)                  | 7.12E-32  | 2.18 (1.98-2.40) | 8.62E-57  | 0.01           | 84                    | 2.34 (2.08-2.64) | 2.34E-86      |  |
| rs114121212     | 32418018 | T/C       | 0.54 | 0.34    | I/I         | 2.82 (2.37-3.35)                  | 7.56E-32  | 2.18 (1.98-2.40) | 9.15E-57  | 0.01           | 84                    | 2.34 (2.08-2.64) | 2.59E-86      |  |
| chr6:32418355:1 | 32418355 | AC/A      | 0.54 | 0.34    | I/I         | 2.82 (2.37-3.35)                  | 7.39E-32  | 2.18 (1.98-2.40) | 9.88E-57  | 0.01           | 84                    | 2.35 (2.08-2.64) | 2.72E-86      |  |
| rs886422        | 30864279 | C/T       | 0.26 | 0.12    | I/O         | 3.07 (2.47-3.82)                  | 4.32E-24  | 2.86 (2.53-3.23) | 5.88E-64  | 0.57           | 0                     | 2.91 (2.51-3.38) | 3.03E-86      |  |
| rs115950714     | 32424568 | G/A       | 0.54 | 0.34    | I/I         | 2.82 (2.37-3.35)                  | 6.85E-32  | 2.18 (1.98-2.40) | 1.72E-56  | 0.01           | 84                    | 2.34 (2.08-2.64) | 4.37E-86      |  |
| rs2535340       | 30838497 | T/C       | 0.26 | 0.12    | I/O         | 3.08 (2.48-3.82)                  | 3.73E-24  | 2.84 (2.52-3.21) | 1.34E-63  | 0.53           | 0                     | 2.91 (2.50-3.37) | 5.85E-86      |  |
| rs1264308       | 30879987 | C/T       | 0.26 | 0.12    | I/O         | 3.07 (2.47-3.81)                  | 4.76E-24  | 2.85 (2.52-3.22) | 1.47E-63  | 0.56           | 0                     | 2.91 (2.51-3.37) | 8.24E-86      |  |
| rs886420        | 30879636 | C/T       | 0.26 | 0.12    | I/O         | 3.08 (2.48-3.82)                  | 2.88E-24  | 2.84 (2.52-3.21) | 2.66E-63  | 0.52           | 0                     | 2.91 (2.51-3.38) | 8.89E-86      |  |
| rs114846898     | 32591141 | G/A       | 0.27 | 0.48    | I/I         | 0.35 (0.29-0.42)                  | 1.84E-28  | 0.43 (0.39-0.48) | 3.19E-59  | 0.05           | 73                    | 0.40 (0.36-0.46) | 8.96E-86      |  |
| rs116364608     | 30834331 | A/G       | 0.26 | 0.12    | I/I         | 3.09 (2.49-3.85)                  | 3.60E-24  | 2.85 (2.52-3.21) | 2.19E-63  | 0.51           | 0                     | 2.91 (2.51-3.38) | 9.18E-86      |  |
| chr6:32418354:1 | 32418354 | AAC/A     | 0.55 | 0.34    | I/I         | 2.85 (2.40-3.40)                  | 5.48E-32  | 2.18 (1.98-2.40) | 4.23E-56  | 0.01           | 86                    | 2.35 (2.09-2.65) | 1.62E-85      |  |
| rs2535332       | 30813249 | C/T       | 0.26 | 0.12    | I/O         | 3.08 (2.48-3.83)                  | 3.17E-24  | 2.85 (2.52-3.22) | 2.74E-63  | 0.51           | 0                     | 2.91 (2.51-3.38) | 9.02E-85      |  |
| rs9271620       | 32591777 | G/T       | 0.27 | 0.48    | I/I         | 0.35 (0.29-0.42)                  | 1.42E-28  | 0.43 (0.39-0.48) | 4.78E-59  | 0.05           | 74                    | 0.40 (0.36-0.46) | 1.05E-85      |  |
| rs114631657     | 32590916 | A/G       | 0.27 | 0.48    | I/I         | 0.35 (0.29-0.42)                  | 2.04E-28  | 0.43 (0.39-0.48) | 4.23E-59  | 0.05           | 73                    | 0.41 (0.36-0.46) | 1.31E-85      |  |
| rs9271588       | 32590953 | T/C       | 0.27 | 0.48    | I/O         | 0.35 (0.29-0.42)                  | 1.93E-28  | 0.43 (0.39-0.48) | 4.62E-59  | 0.05           | 73                    | 0.41 (0.36-0.46) | 1.37E-85      |  |
| chr6:32592902:1 | 32592902 | A/AG      | 0.26 | 0.47    | I/I         | 0.35 (0.29-0.42)                  | 6.40E-28  | 0.42 (0.38-0.47) | 1.92E-59  | 0.10           | 64                    | 0.40 (0.35-0.45) | 1.63E-85      |  |
| rs114392088     | 32374595 | A/G       | 0.31 | 0.15    | I/I         | 2.71 (2.22-3.32)                  | 3.94E-22  | 2.68 (2.39-3.00) | 3.80E-65  | 0.92           | 0                     | 2.69 (2.34-3.09) | 2.13E-85      |  |
| rs1264341       | 30802465 | T/C       | 0.26 | 0.12    | I/O         | 3.03 (2.44-3.77)                  | 1.75E-23  | 2.84 (2.51-3.21) | 1.78E-63  | 0.61           | 0                     | 2.89 (2.49-3.36) | 3.79E-85      |  |
| rs142627922     | 30831195 | G/A       | 0.26 | 0.12    | I/I         | 3.08 (2.47-3.82)                  | 4.34E-24  | 2.83 (2.50-3.19) | 1.00E-62  | 0.51           | 0                     | 2.89 (2.49-3.36) | 4.99E-85      |  |
| chr6:30826945:D | 30826945 | GA/G      | 0.26 | 0.12    | I/I         | 3.04 (2.45-3.79)                  | 1.71E-23  | 2.84 (2.52-3.21) | 2.75E-63  | 0.59           | 0                     | 2.90 (2.50-3.36) | 5.63E-85      |  |
| rs137975635     | 30872783 | C/T       | 0.26 | 0.12    | I/I         | 3.06 (2.46-3.80)                  | 7.37E-24  | 2.83 (2.50-3.20) | 1.14E-62  | 0.54           | 0                     | 2.89 (2.49-3.36) | 9.75E-85      |  |
| rs3130303       | 32205867 | A/G       | 0.30 | 0.15    | I/O         | 2.63 (2.15-3.23)                  | 1.39E-20  | 2.75 (2.45-3.09) | 4.20E-66  | 0.71           | 0                     | 2.72 (2.36-3.13) | 1.29E-84      |  |
| rs2213584       | 32413259 | G/A       | 0.61 | 0.41    | I/I         | 2.74 (2.30-3.27)                  | 4.41E-29  | 2.19 (1.99-2.42) | 1.67E-57  | 0.03           | 79                    | 2.34 (2.07-2.63) | 1.35E-84      |  |
| rs149011455     | 32390332 | C/T       | 0.31 | 0.15    | I/I         | 2.88 (2.34-3.55)                  | 1.34E-23  | 2.70 (2.40-3.04) | 1.15E-62  | 0.59           | 0                     | 2.75 (2.39-3.17) | 1.79E-84      |  |
| rs115377613     | 30825994 | C/T       | 0.26 | 0.12    | I/I         | 3.03 (2.44-3.78)                  | 2.84E-23  | 2.83 (2.51-3.20) | 6.33E-63  | 0.59           | 0                     | 2.89 (2.49-3.35) | 2.16E-84      |  |
| chr6:32171134:1 | 32171134 | T/TA      | 0.30 | 0.15    | I/I         | 2.74 (2.24-3.36)                  | 7.49E-23  | 2.69 (2.40-3.02) | 2.45E-63  | 0.87           | 0                     | 2.71 (2.35-3.11) | 2.36E-84      |  |
| rs144726945     | 32201279 | G/C       | 0.30 | 0.14    | I/I         | 2.71 (2.21-3.33)                  | 9.26E-22  | 2.72 (2.42-3.05) | 2.27E-64  | 0.99           | 0                     | 2.72 (2.36-3.13) | 3.26E-84      |  |
| rs145547914     | 32206243 | C/T       | 0.31 | 0.15    | I/I         | 2.60 (2.12-3.18)                  | 1.81E-20  | 2.74 (2.44-3.08) | 8.69E-66  | 0.65           | 0                     | 2.70 (2.35-3.11) | 3.58E-84      |  |
| rs2071278       | 32165444 | A/G       | 0.30 | 0.15    | I/O         | 2.74 (2.24-3.36)                  | 7.49E-23  | 2.70 (2.40-3.03) | 3.93E-63  | 0.88           | 0                     | 2.71 (2.36-3.12) | 3.76E-84      |  |
| rs141558605     | 30851989 | G/A       | 0.26 | 0.12    | I/I         | 3.04 (2.44-3.78)                  | 1.78E-23  | 2.83 (2.51-3.20) | 1.87E-62  | 0.58           | 0                     | 2.89 (2.49-3.35) | 3.94E-84      |  |
| rs114632632     | 32415522 | T/C       | 0.62 | 0.41    | I/I         | 2.81 (2.35-3.35)                  | 3.40E-30  | 2.17 (1.97-2.38) | 5.36E-56  | 0.01           | 84                    | 2.33 (2.07-2.63) | 4.85E-84      |  |
| rs9268832       | 32427789 | C/T       | 0.61 | 0.41    | I/O         | 2.79 (2.34-3.33)                  | 2.59E-30  | 2.16 (1.96-2.37) | 7.39E-56  | 0.01           | 84                    | 2.32 (2.06-2.61) | 5.38E-84      |  |
| rs116713910     | 32674700 | A/G       | 0.64 | 0.43    | I/I         | 2.50 (2.10-2.98)                  | 1.47E-24  | 2.27 (2.06-2.50) | 4.16E-61  | 0.34           | 0                     | 2.33 (2.07-2.63) | 6.78E-84      |  |
| rs116739320     | 32413830 | C/G       | 0.61 | 0.40    | I/I         | 2.75 (2.31-3.29)                  | 2.10E-29  | 2.17 (1.97-2.38) | 1.77E-56  | 0.02           | 82                    | 2.32 (2.06-2.61) | 8.05E-84      |  |
| rs115496616     | 32674649 | G/A       | 0.64 | 0.43    | I/I         | 2.50 (2.10-2.99)                  | 1.39E-24  | 2.27 (2.06-2.50) | 5.23E-61  | 0.33           | 0                     | 2.33 (2.07-2.63) | 8.07E-84      |  |
| rs2227139       | 32413459 | A/G       | 0.61 | 0.40    | I/O         | 2.74 (2.30-3.27)                  | 4.41E-29  | 2.17 (1.97-2.39) | 1.13E-56  | 0.02           | 81                    | 2.32 (2.06-2.61) | 9.92E-84      |  |
| rs114608781     | 32678199 | A/G       | 0.64 | 0.43    | O/I         | 2.49 (2.09-2.97)                  | 2.70E-24  | 2.28 (2.06-2.51) | 3.33E-61  | 0.38           | 0                     | 2.34 (2.07-2.63) | 1.00E-83      |  |
| rs115002150     | 32674573 | C/T       | 0.64 | 0.43    | I/I         | 2.51 (2.10-2.99)                  | 1.31E-24  | 2.26 (2.05-2.50) | 8.42E-61  | 0.32           | 0                     | 2.33 (2.07-2.63) | 1.22E-83      |  |
| rs2213586       | 32413094 | G/A       | 0.61 | 0.40    | I/O         | 2.74 (2.30-3.27)                  | 4.41E-29  | 2.17 (1.97-2.38) | 1.45E-56  | 0.02           | 81                    | 2.32 (2.06-2.61) | 1.30E-83      |  |
| rs113241530     | 32412480 | A/G       | 0.61 | 0.40    | I/I         | 2.74 (2.29-3.27)                  | 4.33E-29  | 2.17 (1.97-2.38) | 1.51E-56  | 0.02           | 81                    | 2.31 (2.06-2.60) | 1.33E-83      |  |
| rs9275524       | 32675109 | C/T       | 0.64 | 0.43    | I/I         | 2.50 (2.10-2.98)                  | 1.49E-24  | 2.26 (2.05-2.50) | 8.97E-61  | 0.33           | 0                     | 2.33 (2.07-2.62) | 1.48E-83      |  |
| rs115168371     | 32675829 | G/A       | 0.64 | 0.43    | I/I         | 2.51 (2.10-2.99)                  | 1.34E-24  | 2.26 (2.05-2.49) | 1.03E-60  | 0.32           | 0                     | 2.33 (2.07-2.63) | 1.53E-83      |  |
| rs115670275     | 32675789 | A/G       | 0.64 | 0.43    | I/I         | 2.49 (2.09-2.97)                  | 2.50E-24  | 2.27 (2.06-2.51) | 5.73E-61  | 0.37           | 0                     | 2.33 (2.07-2.63) | 1.58E-83      |  |
| rs2213585       | 32413150 | A/G       | 0.61 | 0.40    | I/O         | 2.74 (2.30-3.27)                  | 4.41E-29  | 2.17 (1.97-2.39) | 2.03E-56  | 0.02           | 81                    | 2.32 (2.06-2.61) | 1.83E-83      |  |
| rs4935354       | 32412398 | T/C       | 0.61 | 0.40    | I/I         | 2.76 (2.31-3.29)                  | 4.47E-29  | 2.16 (1.97-2.38) | 2.26E-56  | 0.02           | 82                    | 2.32 (2.06-2.61) | 2.12E-83      |  |
| rs115924299     | 32674564 | T/A       | 0.64 | 0.43    | I/I         | 2.49 (2.09-2.97)                  | 2.87E-24  | 2.27 (2.06-2.50) | 8.17E-61  | 0.35           | 0                     | 2.33 (2.07-2.62) | 2.59E-83      |  |
| rs115734347     | 32418579 | C/A       | 0.62 | 0.42    | I/I         | 2.77 (2.32-3.31)                  | 1.07E-29  | 2.16 (1.96-2.37) | 9.83E-56  | 0.01           | 83                    | 2.31 (2.06-2.61) | 2.65E-83      |  |
| rs114141545     | 32674566 | A/T       | 0.64 | 0.43    | I/I         | 2.49 (2.09-2.97)                  | 2.91E-24  | 2.27 (2.06-2.50) | 8.96E-61  | 0.35           | 0                     | 2.33 (2.07-2.62) | 2.89E-83      |  |
| rs116453192     | 32676017 | C/T       | 0.64 | 0.43    | I/I         | 2.51 (2.10-2.99)                  | 1.34E-24  | 2.26 (2.05-2.49) | 2.46E-60  | 0.31           | 2                     | 2.33 (2.06-2.62) | 3.62E-83      |  |
| rs116763127     | 32676139 | A/T       | 0.64 | 0.43    | I/I         | 2.49 (2.09-2.97)                  | 2.83E-24  | 2.27 (2.06-2.50) | 1.29E-60  | 0.36           | 0                     | 2.33 (2.07-2.63) | 4.02E-83      |  |
| rs115215206     | 30894965 | T/A       | 0.26 | 0.12    | I/I         | 3.05 (2.45-3.79)                  | 1.47E-23  | 2.80 (2.48-3.16) | 2.42E-61  | 0.50           | 0                     | 2.87 (2.47-3.33) | 4.04E-83      |  |
| rs58547911      | 32411646 | G/T       | 0.61 | 0.40    | I/O         | 2.74 (2.30-3.27)                  | 4.41E-29  | 2.16 (1.96-2.38) | 5.61E-56  | 0.02           | 81                    | 2.31 (2.05-2.60) | 5.18E-83      |  |
| rs7195          | 32412539 | G/A       | 0.61 | 0.40    | I/O         | 2.74 (2.30-3.27)                  | 4.41E-29  | 2.16 (1.96-2.38) | 6.01E-56  | 0.02           | 81                    | 2.31 (2.05-2.60) | 5.50E-83      |  |
| rs138029766     | 32420238 | C/T       | 0.62 | 0.42    | I/I         | 2.77 (2.32-3.30)                  | 1.08E-29  | 2.17 (1.97-2.39) | 3.25E-55  | 0.02           | 82                    | 2.32 (2.06-2.62) | 8.22E-83      |  |
| rs114641912     | 32424677 | T/A       | 0.62 | 0.42    | I/I         | 2.77 (2.32-3.30)                  | 1.24E-29  | 2.15 (1.96-2.37) | 2.75E-55  | 0.01           | 84                    | 2.31 (2.05-2.60) | 8.59E-83      |  |
| rs141449709     | 32426458 | G/T       | 0.62 | 0.41    | I/I         | 2.74 (2.30-3.27)                  | 3.48E-29  | 2.15 (1.96-2.37) | 2.92E-55  | 0.02           | 82                    | 2.31 (2.05-2.60) | 2.38E-82      |  |
| rs116078169     | 32425135 | T/C       | 0.62 | 0.42    | I/I         | 2.77 (2.32-3.30)                  | 2.02E-29  | 2.16 (1.96-2.38) | 5.98E-55  | 0.02           | 83                    | 2.31 (2.05-2.61) | 2.96E-82      |  |
| rs419788        | 31928799 | C/T       | 0.49 | 0.30    | I/O         | 2.62 (2.20-3.12)                  | 2.66E-27  | 2.20 (2.00-2.43) | 1.41E-56  | 0.09           | 66                    | 2.31 (2.05-2.61) | 5.57E-82      |  |
| rs437179        | 31929014 | C/A       | 0.49 | 0.30    | I/I         | 2.64 (2.22-3.14)                  | 1.42E-27  | 2.20 (1.99-2.42) | 3.13E-56  | 0.07           | 69                    | 2.31 (2.05-2.61) | 7.02E-82      |  |
| rs114137717     | 32420715 | C/T       | 0.62 | 0.42    | I/I         | 2.76 (2.31-3.29)                  | 2.92E-29  | 2.16 (1.96-2.38) | 1.21E-54  | 0.02           | 82                    | 2.32 (2.05-2.61) | 6.68E-82      |  |
| chr6:32206374:1 | 32206374 | T/TA      | 0.30 | 0.15    | I/I         | 2.59 (2.12-3.17)                  | 1.81E-20  | 2.70 (2.40-3.03) | 3.42E-63  | 0.74           | 0                     | 2.67 (2.32-3.07) | 1.17E-81      |  |
| rs6936204       | 32217092 | C/T       | 0.55 | 0.35    | I/O         | 2.28 (1.93-2.69)                  | 3.92E-22  | 2.23 (2.03-2.45) | 4.34E-61  | 0.83           | 0                     | 2.24 (2.00-2.52) | 2.12E-81      |  |
| rs115414488     | 32421329 | G/T       | 0.63 | 0.43    | I/I         | 2.77 (2.32-3.30)                  | 1.50E-29  | 2.16 (1.96-2.38) | 9.09E-54  | 0.02           | 83                    | 2.32 (2.06-2.62) | 3.20E-81      |  |
| rs440454        | 31927    |           |      |         |             |                                   |           |                  |           |                |                       |                  |               |  |

Supplementary Table 3. Association analysis in HLA

| SNP             | BP       | Alleles   |      | MAF     |             | Observed or Imputed in Dataset1/2 | Dataset 1 |                  | Dataset 2 |                | Test of heterogeneity |                  | Meta analysis |  |
|-----------------|----------|-----------|------|---------|-------------|-----------------------------------|-----------|------------------|-----------|----------------|-----------------------|------------------|---------------|--|
|                 |          | maj / min | Case | Control | OR (95% CI) |                                   | P         | OR (95% CI)      | P         | P <sub>Q</sub> | I <sup>2</sup>        | OR (95% CI)      | P             |  |
|                 |          |           |      |         |             |                                   |           |                  |           |                |                       |                  |               |  |
| rs3131934       | 30931844 | T/C       | 0.28 | 0.14    | I/O         | 2.82 (2.29-3.48)                  | 1.95E-22  | 2.61 (2.33-2.93) | 1.45E-59  | 0.53           | 0                     | 2.67 (2.32-3.08) | 3.25E-80      |  |
| rs116257090     | 32585055 | G/A       | 0.58 | 0.38    | I/I         | 2.53 (2.13-3.01)                  | 1.26E-25  | 2.17 (1.97-2.39) | 7.50E-56  | 0.13           | 56                    | 2.27 (2.02-2.56) | 1.16E-79      |  |
| rs115124407     | 30913458 | G/A       | 0.27 | 0.13    | I/I         | 2.79 (2.25-3.44)                  | 2.69E-21  | 2.69 (2.39-3.03) | 4.26E-60  | 0.78           | 0                     | 2.72 (2.35-3.14) | 1.44E-79      |  |
| rs115404837     | 32223258 | C/T       | 0.56 | 0.36    | I/I         | 2.33 (1.97-2.76)                  | 4.68E-23  | 2.17 (1.98-2.39) | 5.11E-57  | 0.47           | 0                     | 2.22 (1.97-2.49) | 2.55E-78      |  |
| chr6:31606677:D | 31606677 | indel/A   | 0.32 | 0.16    | I/I         | 2.59 (2.12-3.17)                  | 2.20E-20  | 2.57 (2.29-2.88) | 3.61E-59  | 0.94           | 0                     | 2.58 (2.24-2.96) | 1.10E-77      |  |
| rs644045        | 31883957 | G/A       | 0.54 | 0.35    | I/O         | 2.52 (2.12-2.99)                  | 4.80E-26  | 2.12 (1.93-2.33) | 1.70E-53  | 0.09           | 66                    | 2.23 (1.98-2.50) | 1.20E-77      |  |
| rs3128759       | 31885930 | T/C       | 0.54 | 0.35    | I/I         | 2.50 (2.11-2.97)                  | 7.62E-26  | 2.12 (1.93-2.33) | 1.59E-53  | 0.10           | 64                    | 2.22 (1.98-2.50) | 1.72E-77      |  |
| rs115491205     | 32446010 | T/C       | 0.26 | 0.45    | I/I         | 0.36 (0.30-0.44)                  | 4.03E-25  | 0.44 (0.39-0.48) | 5.56E-54  | 0.10           | 64                    | 0.41 (0.36-0.47) | 2.69E-77      |  |
| rs116392240     | 31881731 | A/G       | 0.54 | 0.35    | I/I         | 2.50 (2.11-2.97)                  | 8.67E-26  | 2.11 (1.92-2.32) | 8.38E-53  | 0.09           | 66                    | 2.21 (1.97-2.49) | 1.07E-76      |  |
| rs113457344     | 32603599 | C/T       | 0.43 | 0.26    | I/I         | 2.20 (1.83-2.64)                  | 7.70E-17  | 2.33 (2.11-2.58) | 1.99E-61  | 0.59           | 0                     | 2.29 (2.02-2.59) | 5.86E-76      |  |
| rs3131921       | 30907335 | T/C       | 0.28 | 0.14    | I/O         | 2.71 (2.20-3.33)                  | 5.24E-21  | 2.58 (2.29-2.90) | 1.03E-56  | 0.69           | 0                     | 2.62 (2.27-3.02) | 6.20E-76      |  |
| rs1811197       | 31327660 | G/A       | 0.33 | 0.17    | I/I         | 2.58 (2.12-3.14)                  | 4.05E-21  | 2.47 (2.21-2.76) | 1.43E-56  | 0.71           | 0                     | 2.50 (2.18-2.87) | 6.57E-76      |  |
| rs3132579       | 30940989 | T/C       | 0.32 | 0.17    | I/O         | 2.58 (2.12-3.14)                  | 6.96E-21  | 2.44 (2.19-2.73) | 1.20E-56  | 0.63           | 0                     | 2.48 (2.17-2.84) | 9.64E-76      |  |
| rs115657185     | 32602372 | G/T       | 0.43 | 0.26    | I/I         | 2.14 (1.78-2.56)                  | 2.64E-16  | 2.33 (2.11-2.57) | 7.73E-62  | 0.42           | 0                     | 2.27 (2.01-2.57) | 1.12E-75      |  |
| rs9273011       | 32611611 | T/C       | 0.43 | 0.26    | I/I         | 2.14 (1.79-2.57)                  | 2.35E-16  | 2.33 (2.11-2.57) | 9.76E-62  | 0.44           | 0                     | 2.27 (2.01-2.57) | 1.25E-75      |  |
| rs113642651     | 32603583 | A/G       | 0.43 | 0.26    | I/I         | 2.19 (1.82-2.64)                  | 8.26E-17  | 2.32 (2.10-2.57) | 5.81E-61  | 0.60           | 0                     | 2.29 (2.02-2.59) | 1.77E-75      |  |
| rs116105527     | 32602352 | C/T       | 0.43 | 0.26    | I/I         | 2.14 (1.78-2.56)                  | 2.59E-16  | 2.32 (2.10-2.57) | 1.37E-61  | 0.43           | 0                     | 2.27 (2.01-2.57) | 1.90E-75      |  |
| rs115982876     | 32603133 | C/T       | 0.43 | 0.26    | I/I         | 2.13 (1.78-2.56)                  | 3.38E-16  | 2.33 (2.11-2.57) | 1.01E-61  | 0.41           | 0                     | 2.27 (2.01-2.57) | 1.91E-75      |  |
| rs116148828     | 32602952 | T/A       | 0.43 | 0.26    | I/I         | 2.14 (1.78-2.56)                  | 3.09E-16  | 2.33 (2.11-2.57) | 1.14E-61  | 0.41           | 0                     | 2.27 (2.01-2.57) | 1.95E-75      |  |
| rs147811059     | 32445306 | G/A       | 0.25 | 0.44    | I/I         | 0.37 (0.30-0.45)                  | 1.03E-24  | 0.44 (0.40-0.49) | 1.71E-52  | 0.11           | 61                    | 0.42 (0.37-0.48) | 2.18E-75      |  |
| rs114502629     | 32451570 | C/T       | 0.25 | 0.44    | I/I         | 0.36 (0.30-0.44)                  | 5.36E-25  | 0.44 (0.39-0.49) | 3.87E-52  | 0.08           | 67                    | 0.41 (0.36-0.47) | 2.66E-75      |  |
| rs116792440     | 32602702 | T/C       | 0.43 | 0.26    | I/I         | 2.13 (1.78-2.56)                  | 4.68E-16  | 2.32 (2.10-2.57) | 1.32E-61  | 0.42           | 0                     | 2.27 (2.01-2.57) | 3.37E-75      |  |
| rs116271468     | 32452626 | C/G       | 0.25 | 0.44    | I/I         | 0.36 (0.30-0.44)                  | 1.28E-24  | 0.44 (0.40-0.49) | 3.06E-52  | 0.09           | 66                    | 0.42 (0.37-0.48) | 4.95E-75      |  |
| rs1964995       | 32449411 | T/C       | 0.25 | 0.44    | I/O         | 0.36 (0.30-0.44)                  | 5.57E-25  | 0.45 (0.40-0.50) | 7.23E-52  | 0.06           | 71                    | 0.42 (0.37-0.48) | 5.54E-75      |  |
| rs9273047       | 32612006 | C/T       | 0.43 | 0.26    | I/I         | 2.13 (1.77-2.55)                  | 6.01E-16  | 2.34 (2.11-2.58) | 1.55E-61  | 0.38           | 0                     | 2.27 (2.01-2.57) | 5.94E-75      |  |
| rs9273012       | 32611641 | A/G       | 0.43 | 0.26    | O/O         | 2.12 (1.77-2.55)                  | 5.67E-16  | 2.32 (2.10-2.57) | 1.82E-61  | 0.39           | 0                     | 2.27 (2.00-2.56) | 6.26E-75      |  |
| rs115795212     | 32445114 | A/G       | 0.25 | 0.44    | I/I         | 0.36 (0.30-0.44)                  | 3.00E-25  | 0.45 (0.40-0.50) | 1.92E-51  | 0.05           | 74                    | 0.42 (0.37-0.48) | 8.33E-75      |  |
| rs116247318     | 32445117 | C/T       | 0.25 | 0.44    | I/I         | 0.36 (0.30-0.44)                  | 3.00E-25  | 0.45 (0.40-0.50) | 1.92E-51  | 0.05           | 74                    | 0.42 (0.37-0.48) | 8.33E-75      |  |
| rs9272450       | 32605478 | C/T       | 0.43 | 0.26    | I/I         | 2.10 (1.75-2.53)                  | 1.99E-15  | 2.34 (2.11-2.58) | 7.17E-62  | 0.33           | 0                     | 2.27 (2.00-2.57) | 1.05E-74      |  |
| rs114852083     | 32447216 | A/T       | 0.25 | 0.44    | I/I         | 0.36 (0.30-0.44)                  | 3.84E-25  | 0.45 (0.40-0.50) | 2.22E-51  | 0.06           | 73                    | 0.42 (0.37-0.48) | 1.20E-74      |  |
| rs116573973     | 32447219 | G/A       | 0.25 | 0.44    | I/I         | 0.36 (0.30-0.44)                  | 3.84E-25  | 0.45 (0.40-0.50) | 2.22E-51  | 0.06           | 73                    | 0.42 (0.37-0.48) | 1.20E-74      |  |
| chr6:32444733:D | 32444733 | TG/T      | 0.25 | 0.44    | I/I         | 0.37 (0.30-0.44)                  | 5.69E-25  | 0.45 (0.40-0.50) | 1.60E-51  | 0.07           | 70                    | 0.42 (0.37-0.48) | 1.23E-74      |  |
| rs9272448       | 32605439 | A/T       | 0.43 | 0.26    | I/I         | 2.10 (1.75-2.53)                  | 2.10E-15  | 2.34 (2.12-2.59) | 7.94E-62  | 0.32           | 0                     | 2.27 (2.01-2.57) | 1.24E-74      |  |
| rs115719056     | 32447162 | G/A       | 0.25 | 0.44    | I/I         | 0.36 (0.30-0.44)                  | 5.11E-25  | 0.45 (0.40-0.50) | 2.12E-51  | 0.06           | 72                    | 0.42 (0.37-0.48) | 1.49E-74      |  |
| rs149461177     | 32444330 | A/C       | 0.25 | 0.44    | I/I         | 0.37 (0.30-0.44)                  | 5.23E-25  | 0.45 (0.40-0.50) | 2.28E-51  | 0.06           | 71                    | 0.42 (0.37-0.48) | 1.65E-74      |  |
| rs114505663     | 32450678 | T/C       | 0.25 | 0.44    | I/I         | 0.36 (0.30-0.44)                  | 6.77E-25  | 0.45 (0.40-0.50) | 1.84E-51  | 0.06           | 71                    | 0.42 (0.37-0.48) | 1.71E-74      |  |
| rs115741842     | 32444198 | G/T       | 0.25 | 0.44    | I/I         | 0.37 (0.30-0.44)                  | 5.23E-25  | 0.45 (0.40-0.50) | 2.36E-51  | 0.06           | 71                    | 0.42 (0.37-0.48) | 1.71E-74      |  |
| rs144156572     | 32447715 | A/G       | 0.25 | 0.44    | I/I         | 0.36 (0.30-0.44)                  | 6.16E-25  | 0.45 (0.40-0.50) | 2.18E-51  | 0.07           | 70                    | 0.42 (0.37-0.48) | 1.83E-74      |  |
| rs116254096     | 32445992 | G/A       | 0.25 | 0.44    | I/I         | 0.36 (0.30-0.44)                  | 3.50E-25  | 0.45 (0.41-0.50) | 3.97E-51  | 0.05           | 73                    | 0.42 (0.37-0.48) | 1.99E-74      |  |
| rs115912550     | 32443451 | G/A       | 0.25 | 0.44    | I/I         | 0.37 (0.30-0.44)                  | 5.56E-25  | 0.45 (0.40-0.50) | 2.74E-51  | 0.06           | 71                    | 0.42 (0.37-0.48) | 2.12E-74      |  |
| rs116004025     | 32447111 | A/G       | 0.25 | 0.44    | I/I         | 0.36 (0.30-0.44)                  | 3.21E-25  | 0.45 (0.41-0.50) | 5.04E-51  | 0.05           | 74                    | 0.42 (0.37-0.48) | 2.37E-74      |  |
| rs148818498     | 32447014 | G/A       | 0.25 | 0.44    | I/I         | 0.36 (0.30-0.44)                  | 3.23E-25  | 0.45 (0.41-0.50) | 5.09E-51  | 0.05           | 74                    | 0.42 (0.37-0.48) | 2.41E-74      |  |
| rs9273037       | 32611912 | G/A       | 0.43 | 0.26    | I/I         | 2.13 (1.77-2.56)                  | 6.59E-16  | 2.32 (2.10-2.56) | 7.48E-61  | 0.43           | 0                     | 2.26 (2.00-2.56) | 2.49E-74      |  |
| rs145378220     | 32446674 | A/T       | 0.25 | 0.43    | I/I         | 0.37 (0.30-0.44)                  | 1.35E-24  | 0.44 (0.40-0.49) | 1.69E-51  | 0.10           | 62                    | 0.42 (0.37-0.48) | 2.83E-74      |  |
| rs116464335     | 32445079 | C/T       | 0.25 | 0.44    | I/I         | 0.37 (0.30-0.44)                  | 5.62E-25  | 0.45 (0.41-0.50) | 5.22E-51  | 0.06           | 72                    | 0.42 (0.37-0.48) | 4.11E-74      |  |
| rs114142794     | 32447341 | G/A       | 0.25 | 0.44    | I/I         | 0.36 (0.30-0.44)                  | 3.92E-25  | 0.45 (0.41-0.50) | 8.35E-51  | 0.05           | 74                    | 0.42 (0.37-0.48) | 4.76E-74      |  |
| rs114473234     | 32443666 | G/C       | 0.24 | 0.43    | I/I         | 0.37 (0.30-0.44)                  | 7.08E-25  | 0.44 (0.39-0.49) | 6.74E-51  | 0.11           | 61                    | 0.42 (0.36-0.47) | 6.05E-74      |  |
| rs116030749     | 31265135 | G/C       | 0.44 | 0.26    | I/I         | 2.38 (2.01-2.82)                  | 1.18E-23  | 2.17 (1.97-2.40) | 4.54E-52  | 0.36           | 0                     | 2.23 (1.98-2.51) | 6.18E-74      |  |
| chr6:32611850:D | 32611850 | AC/A      | 0.43 | 0.26    | I/I         | 2.14 (1.78-2.57)                  | 7.15E-16  | 2.33 (2.10-2.58) | 1.98E-60  | 0.43           | 0                     | 2.27 (2.01-2.57) | 6.76E-74      |  |
| rs114106992     | 32394537 | C/T       | 0.33 | 0.18    | I/I         | 2.52 (2.07-3.06)                  | 1.48E-20  | 2.38 (2.14-2.65) | 5.10E-55  | 0.63           | 0                     | 2.42 (2.12-2.76) | 8.39E-74      |  |
| rs9273064       | 32612202 | A/G       | 0.43 | 0.26    | I/I         | 2.09 (1.74-2.52)                  | 4.08E-15  | 2.33 (2.10-2.57) | 3.14E-61  | 0.32           | 0                     | 2.26 (2.00-2.56) | 9.24E-74      |  |
| rs9272421       | 32605118 | G/A       | 0.43 | 0.26    | I/I         | 2.10 (1.74-2.52)                  | 8.82E-15  | 2.32 (2.10-2.56) | 6.26E-61  | 0.34           | 0                     | 2.25 (1.99-2.55) | 1.21E-73      |  |
| rs9268659       | 32410941 | C/T       | 0.63 | 0.44    | I/I         | 2.46 (2.07-2.92)                  | 2.22E-24  | 2.08 (1.89-2.28) | 4.87E-51  | 0.09           | 64                    | 2.18 (1.94-2.45) | 1.42E-73      |  |
| rs3129763       | 32590925 | G/A       | 0.38 | 0.22    | I/O         | 2.32 (1.92-2.81)                  | 2.69E-18  | 2.35 (2.12-2.61) | 3.08E-57  | 0.91           | 0                     | 2.34 (2.06-2.67) | 1.46E-73      |  |
| rs115804231     | 32391516 | G/A       | 0.33 | 0.18    | I/I         | 2.50 (2.06-3.04)                  | 3.18E-20  | 2.39 (2.14-2.66) | 4.49E-55  | 0.68           | 0                     | 2.42 (2.12-2.76) | 1.64E-73      |  |
| chr6:32802712:D | 32802712 | TTTG/T    | 0.24 | 0.11    | I/I         | 2.83 (2.28-3.52)                  | 3.32E-21  | 2.76 (2.42-3.13) | 5.34E-54  | 0.83           | 0                     | 2.78 (2.38-3.24) | 1.87E-73      |  |
| rs9272496       | 32606144 | A/G       | 0.43 | 0.26    | I/I         | 2.12 (1.77-2.55)                  | 9.34E-16  | 2.31 (2.09-2.55) | 5.04E-60  | 0.44           | 0                     | 2.25 (1.99-2.55) | 2.30E-73      |  |
| rs115519609     | 32452399 | G/A       | 0.25 | 0.44    | I/I         | 0.36 (0.30-0.44)                  | 1.82E-24  | 0.44 (0.40-0.49) | 1.40E-50  | 0.07           | 70                    | 0.42 (0.37-0.48) | 3.36E-73      |  |
| rs115260515     | 32452361 | C/T       | 0.25 | 0.44    | I/I         | 0.36 (0.30-0.44)                  | 1.98E-24  | 0.44 (0.40-0.49) | 1.55E-50  | 0.08           | 68                    | 0.42 (0.37-0.48) | 3.99E-73      |  |
| rs2395161       | 32387752 | A/C       | 0.33 | 0.18    | I/O         | 2.47 (2.03-3.00)                  | 7.04E-20  | 2.38 (2.13-2.65) | 5.15E-55  | 0.74           | 0                     | 2.40 (2.10-2.74) | 4.31E-73      |  |
| chr6:32605982:I | 32605982 | T/TTA     | 0.43 | 0.26    | I/I         | 2.12 (1.76-2.54)                  | 1.38E-15  | 2.31 (2.09-2.55) | 6.20E-60  | 0.41           | 0                     | 2.25 (1.99-2.55) | 4.41E-73      |  |
| rs2535296       | 31060219 | A/G       | 0.30 | 0.16    | I/O         | 2.77 (2.25-3.40)                  | 3.12E-22  | 2.40 (2.15-2.69) | 1.50E-52  | 0.24           | 27                    | 2.50 (2.18-2.88) | 4.87E-73      |  |
| rs116399799     | 32452602 | C/T       | 0.26 | 0.45    | I/I         | 0.38 (0.31-0.46)                  | 3.64E-23  | 0.45 (0.40-0.50) | 1.37E-51  | 0.15           | 51                    | 0.43 (0.37-0.48) | 5.46E-73      |  |
| rs9272449       | 32605451 | A/G       | 0.43 | 0.26    | I/I         | 2.10 (1.75-2.53)                  | 2.84E-15  | 2.32 (2.10-2.56) | 5.01E-60  | 0.36           | 0                     | 2.25 (1.99-2.55) | 8.72E-73      |  |
| rs9273072       | 32612265 | C/A       | 0.43 | 0.26    | I/I         | 2.10 (1.74-2.52)                  | 3.75E-15  | 2.31 (2.09-2.56) | 3.88E-60  | 0.36           | 0                     | 2.25 (1.99-2.55) | 8.79E-73      |  |
| rs9272646       | 32608394 | T/C       | 0.43 | 0.26    | I/I         | 2.14 (1.78-2.57)                  | 5.19E-16  | 2.30 (2.08-2.54) | 5.30E-59  | 0.51           | 0                     | 2.25 (1.99-2.55) | 1.08E-72      |  |
| rs1047993       | 32605271 | C/T       | 0.43 | 0.26    | I/I         | 2.10 (1.75-2.52)                  | 2.15E-15  | 2.31 (2.09-2.56) | 1.07E-59  | 0.38           | 0                     | 2.25 (1.99-2.55) | 1.28E-72      |  |
| rs9267972       | 32217232 | G/A       | 0.58 | 0.39    | I/I         | 2.25 (1.90-2.66)                  | 4.77E-21  | 2.12 (1.92-2.33) | 3.84E-53  | 0.55           | 0                     | 2.15 (1.92-2.42) | 1.90E-72      |  |
| rs1264361       | 30777498 | A/G       | 0.26 | 0.13    | I/O         | 2.71 (2.19-3.36)                  | 3.72E-20  | 2.58 (2.29-2.91) | 4.68E-54  | 0.69           | 0                     | 2.62 (2.26-3.03) | 1.92E-72      |  |
| rs116417913     | 32668323 |           |      |         |             |                                   |           |                  |           |                |                       |                  |               |  |

**Supplementary Table 3.** Association analysis in HLA

| SNP             | BP       | Alleles   |      | MAF     |             | Observed or Imputed in Dataset1/2 | Dataset 1 |                  | Dataset 2 |       | Test of heterogeneity |                  | Meta analysis |  |
|-----------------|----------|-----------|------|---------|-------------|-----------------------------------|-----------|------------------|-----------|-------|-----------------------|------------------|---------------|--|
|                 |          | maj / min | Case | Control | OR (95% CI) |                                   | P         | OR (95% CI)      | P         | $P_Q$ | $I^2$                 | OR (95% CI)      | P             |  |
|                 |          |           |      |         |             |                                   |           |                  |           |       |                       |                  |               |  |
| rs114038635     | 32601222 | T/C       | 0.43 | 0.26    | I/I         | 2.13 (1.77-2.56)                  | 8.23E-16  | 2.28 (2.06-2.52) | 9.80E-59  | 0.51  | 0                     | 2.24 (1.98-2.53) | 3.41E-72      |  |
| rs3131783       | 30932068 | G/A       | 0.29 | 0.15    | I/O         | 2.47 (2.02-3.03)                  | 1.70E-18  | 2.50 (2.23-2.80) | 1.58E-55  | 0.94  | 0                     | 2.49 (2.17-2.86) | 3.97E-72      |  |
| rs3135376       | 32385470 | A/G       | 0.33 | 0.18    | I/O         | 2.47 (2.03-2.99)                  | 7.73E-20  | 2.36 (2.12-2.63) | 4.90E-54  | 0.70  | 0                     | 2.39 (2.09-2.73) | 4.29E-72      |  |
| rs115782258     | 32668336 | C/A       | 0.59 | 0.40    | I/I         | 2.46 (2.06-2.92)                  | 3.26E-24  | 2.07 (1.88-2.28) | 1.20E-49  | 0.09  | 65                    | 2.17 (1.93-2.44) | 5.52E-72      |  |
| rs114903282     | 32668713 | G/C       | 0.59 | 0.40    | I/I         | 2.45 (2.06-2.91)                  | 3.76E-24  | 2.07 (1.88-2.28) | 1.09E-49  | 0.10  | 63                    | 2.17 (1.93-2.44) | 5.63E-72      |  |
| rs9272630       | 32608150 | G/A       | 0.43 | 0.26    | I/I         | 2.14 (1.78-2.58)                  | 5.71E-16  | 2.29 (2.07-2.53) | 2.70E-58  | 0.55  | 0                     | 2.25 (1.98-2.54) | 5.65E-72      |  |
| rs116647890     | 32671765 | G/A       | 0.59 | 0.40    | I/I         | 2.45 (2.06-2.91)                  | 3.50E-24  | 2.07 (1.88-2.28) | 1.48E-49  | 0.10  | 64                    | 2.17 (1.93-2.44) | 7.25E-72      |  |
| chr6:32608168:D | 32608168 | CAT/C     | 0.43 | 0.26    | I/I         | 2.14 (1.78-2.58)                  | 6.02E-16  | 2.28 (2.06-2.52) | 3.81E-58  | 0.56  | 0                     | 2.24 (1.98-2.54) | 8.39E-72      |  |
| rs114179331     | 32667958 | G/A       | 0.59 | 0.40    | I/I         | 2.47 (2.07-2.94)                  | 2.30E-24  | 2.07 (1.88-2.28) | 2.68E-49  | 0.08  | 66                    | 2.18 (1.93-2.45) | 8.79E-72      |  |
| rs114699653     | 32393959 | T/C       | 0.33 | 0.18    | I/I         | 2.50 (2.06-3.04)                  | 3.16E-20  | 2.35 (2.10-2.62) | 2.71E-53  | 0.58  | 0                     | 2.39 (2.09-2.73) | 9.20E-72      |  |
| rs114882497     | 32391192 | T/C       | 0.33 | 0.18    | I/I         | 2.52 (2.08-3.07)                  | 1.10E-20  | 2.33 (2.09-2.60) | 8.09E-53  | 0.49  | 0                     | 2.39 (2.09-2.72) | 9.23E-72      |  |
| rs115042972     | 32394845 | G/A       | 0.32 | 0.18    | I/I         | 2.50 (2.06-3.04)                  | 3.40E-20  | 2.35 (2.11-2.62) | 2.58E-53  | 0.59  | 0                     | 2.39 (2.09-2.73) | 9.43E-72      |  |
| rs2647012       | 32664458 | C/T       | 0.59 | 0.40    | I/O         | 2.47 (2.08-2.94)                  | 1.43E-24  | 2.06 (1.87-2.27) | 4.71E-49  | 0.07  | 69                    | 2.17 (1.93-2.44) | 1.02E-71      |  |
| rs2647003       | 32664880 | G/T       | 0.59 | 0.40    | I/I         | 2.46 (2.07-2.92)                  | 1.68E-24  | 2.06 (1.87-2.27) | 4.24E-49  | 0.08  | 68                    | 2.17 (1.93-2.44) | 1.06E-71      |  |
| rs115768610     | 32394585 | C/T       | 0.33 | 0.18    | I/I         | 2.50 (2.05-3.03)                  | 4.32E-20  | 2.35 (2.10-2.62) | 2.39E-53  | 0.59  | 0                     | 2.39 (2.09-2.73) | 1.12E-71      |  |
| rs144130032     | 32443172 | C/T       | 0.25 | 0.43    | I/I         | 0.38 (0.31-0.46)                  | 1.21E-22  | 0.45 (0.40-0.50) | 9.20E-51  | 0.14  | 53                    | 0.43 (0.38-0.49) | 1.24E-71      |  |
| rs2646998       | 32665367 | G/T       | 0.59 | 0.40    | I/I         | 2.45 (2.06-2.91)                  | 3.11E-24  | 2.06 (1.87-2.27) | 3.98E-49  | 0.09  | 66                    | 2.16 (1.92-2.43) | 1.77E-71      |  |
| rs114241677     | 30781301 | T/C       | 0.25 | 0.12    | I/I         | 2.66 (2.14-3.30)                  | 7.83E-19  | 2.59 (2.30-2.92) | 1.94E-54  | 0.84  | 0                     | 2.61 (2.25-3.03) | 1.90E-71      |  |
| rs3093988       | 31492453 | G/A       | 0.31 | 0.16    | I/O         | 2.64 (2.17-3.21)                  | 2.75E-22  | 2.35 (2.10-2.62) | 6.54E-51  | 0.30  | 5                     | 2.43 (2.12-2.78) | 1.91E-71      |  |
| rs9268534       | 32383307 | T/G       | 0.33 | 0.18    | I/O         | 2.47 (2.03-3.00)                  | 7.04E-20  | 2.35 (2.10-2.62) | 2.80E-53  | 0.66  | 0                     | 2.38 (2.08-2.72) | 2.17E-71      |  |
| rs1264353       | 30787762 | C/A       | 0.26 | 0.13    | I/O         | 2.71 (2.19-3.36)                  | 3.82E-20  | 2.56 (2.27-2.89) | 6.23E-53  | 0.65  | 0                     | 2.61 (2.25-3.02) | 2.54E-71      |  |
| rs2213580       | 32388574 | T/C       | 0.33 | 0.18    | I/O         | 2.47 (2.03-3.00)                  | 7.04E-20  | 2.35 (2.11-2.63) | 3.75E-53  | 0.68  | 0                     | 2.39 (2.09-2.73) | 2.90E-71      |  |
| rs143700239     | 32386495 | T/C       | 0.33 | 0.18    | I/I         | 2.49 (2.05-3.03)                  | 3.83E-20  | 2.33 (2.09-2.60) | 8.13E-53  | 0.55  | 0                     | 2.38 (2.08-2.71) | 3.30E-71      |  |
| rs2856666       | 32665285 | T/G       | 0.59 | 0.40    | I/I         | 2.44 (2.05-2.89)                  | 6.59E-24  | 2.06 (1.87-2.27) | 4.25E-49  | 0.10  | 64                    | 2.16 (1.92-2.43) | 3.84E-71      |  |
| rs138498099     | 32386506 | T/C       | 0.33 | 0.18    | I/I         | 2.49 (2.05-3.02)                  | 5.26E-20  | 2.33 (2.09-2.60) | 7.13E-53  | 0.57  | 0                     | 2.37 (2.08-2.71) | 4.01E-71      |  |
| rs1313566       | 32388709 | T/C       | 0.33 | 0.18    | I/I         | 2.47 (2.03-3.00)                  | 7.04E-20  | 2.33 (2.09-2.60) | 5.29E-53  | 0.62  | 0                     | 2.37 (2.08-2.71) | 4.05E-71      |  |
| rs2233956       | 31081205 | T/C       | 0.33 | 0.18    | O/O         | 2.22 (1.83-2.70)                  | 4.62E-16  | 2.41 (2.16-2.68) | 3.09E-57  | 0.49  | 0                     | 2.35 (2.06-2.69) | 4.72E-71      |  |
| rs116340694     | 32387278 | T/A       | 0.33 | 0.18    | I/I         | 2.46 (2.03-2.99)                  | 9.89E-20  | 2.33 (2.10-2.60) | 4.42E-53  | 0.64  | 0                     | 2.37 (2.08-2.71) | 4.80E-71      |  |
| rs13130623      | 31597700 | C/T       | 0.34 | 0.19    | I/O         | 2.40 (1.98-2.91)                  | 5.58E-19  | 2.35 (2.11-2.62) | 7.06E-54  | 0.86  | 0                     | 2.36 (2.07-2.70) | 4.85E-71      |  |
| rs114114671     | 32386707 | T/C       | 0.33 | 0.18    | I/I         | 2.47 (2.03-3.00)                  | 7.23E-20  | 2.33 (2.09-2.60) | 7.73E-53  | 0.61  | 0                     | 2.37 (2.07-2.71) | 6.04E-71      |  |
| chr6:31620483:D | 31620483 | TC/T      | 0.33 | 0.18    | I/I         | 2.39 (1.97-2.91)                  | 3.08E-18  | 2.40 (2.15-2.68) | 1.40E-54  | 0.98  | 0                     | 2.40 (2.10-2.74) | 6.21E-71      |  |
| rs138363570     | 32386643 | G/A       | 0.33 | 0.18    | I/I         | 2.47 (2.03-3.00)                  | 7.23E-20  | 2.33 (2.09-2.60) | 9.93E-53  | 0.61  | 0                     | 2.37 (2.07-2.70) | 7.73E-71      |  |
| rs116271293     | 32661302 | G/T       | 0.59 | 0.41    | I/I         | 2.47 (2.08-2.94)                  | 1.97E-24  | 2.05 (1.86-2.26) | 3.32E-48  | 0.07  | 70                    | 2.16 (1.92-2.44) | 1.01E-70      |  |
| rs113508636     | 32583477 | T/C       | 0.61 | 0.42    | I/I         | 2.45 (2.06-2.92)                  | 8.47E-24  | 2.07 (1.88-2.29) | 1.04E-48  | 0.10  | 63                    | 2.18 (1.93-2.45) | 1.12E-70      |  |
| rs76804881      | 32611527 | A/T       | 0.43 | 0.26    | I/I         | 2.15 (1.79-2.59)                  | 3.26E-16  | 2.25 (2.04-2.49) | 1.39E-56  | 0.68  | 0                     | 2.23 (1.97-2.52) | 1.30E-70      |  |
| rs2395164       | 32387860 | C/T       | 0.32 | 0.18    | I/O         | 2.48 (2.04-3.01)                  | 5.16E-20  | 2.34 (2.10-2.62) | 2.98E-52  | 0.62  | 0                     | 2.38 (2.08-2.72) | 1.62E-70      |  |
| rs2736157       | 31600820 | A/G       | 0.33 | 0.18    | I/O         | 2.35 (1.94-2.86)                  | 7.56E-18  | 2.39 (2.14-2.66) | 1.50E-54  | 0.89  | 0                     | 2.38 (2.08-2.72) | 1.75E-70      |  |
| rs77484723      | 32611531 | T/C       | 0.43 | 0.26    | I/I         | 2.15 (1.79-2.59)                  | 3.46E-16  | 2.25 (2.04-2.49) | 1.97E-56  | 0.68  | 0                     | 2.22 (1.96-2.52) | 1.94E-70      |  |
| rs3130070       | 31591808 | A/G       | 0.33 | 0.18    | I/O         | 2.37 (1.95-2.88)                  | 4.29E-18  | 2.38 (2.13-2.65) | 4.61E-54  | 0.97  | 0                     | 2.38 (2.08-2.72) | 2.81E-70      |  |
| rs1051336       | 32412592 | G/A       | 0.33 | 0.18    | I/O         | 2.45 (2.02-2.97)                  | 4.97E-20  | 2.31 (2.07-2.58) | 5.80E-52  | 0.60  | 0                     | 2.35 (2.06-2.68) | 3.00E-70      |  |
| rs116442837     | 31633496 | G/T       | 0.33 | 0.18    | I/I         | 2.36 (1.94-2.87)                  | 5.12E-18  | 2.38 (2.13-2.65) | 4.26E-54  | 0.95  | 0                     | 2.37 (2.08-2.71) | 3.17E-70      |  |
| rs116832701     | 32390196 | T/C       | 0.32 | 0.18    | I/I         | 2.47 (2.03-3.00)                  | 1.58E-19  | 2.33 (2.09-2.60) | 1.93E-52  | 0.63  | 0                     | 2.37 (2.07-2.71) | 3.33E-70      |  |
| chr6:31606901:I | 31606901 | C/CAAAG   | 0.33 | 0.18    | I/I         | 2.36 (1.94-2.86)                  | 6.11E-18  | 2.38 (2.13-2.65) | 5.27E-54  | 0.95  | 0                     | 2.37 (2.07-2.71) | 4.71E-70      |  |
| rs147105852     | 31606398 | C/G       | 0.33 | 0.18    | I/I         | 2.36 (1.94-2.86)                  | 6.11E-18  | 2.38 (2.13-2.65) | 5.27E-54  | 0.95  | 0                     | 2.37 (2.07-2.71) | 4.71E-70      |  |
| rs2395159       | 32384077 | C/T       | 0.33 | 0.18    | I/I         | 2.43 (2.00-2.96)                  | 3.45E-19  | 2.33 (2.09-2.60) | 1.43E-52  | 0.70  | 0                     | 2.36 (2.06-2.69) | 5.50E-70      |  |
| rs116031824     | 31630968 | G/A       | 0.33 | 0.18    | I/I         | 2.35 (1.93-2.86)                  | 8.80E-18  | 2.38 (2.13-2.66) | 4.15E-54  | 0.91  | 0                     | 2.37 (2.07-2.71) | 5.53E-70      |  |
| rs11229         | 31603770 | A/G       | 0.33 | 0.18    | I/O         | 2.36 (1.94-2.86)                  | 6.11E-18  | 2.38 (2.13-2.65) | 7.97E-54  | 0.95  | 0                     | 2.37 (2.07-2.71) | 7.01E-70      |  |
| rs116300513     | 31597875 | A/G       | 0.33 | 0.18    | I/I         | 2.36 (1.94-2.86)                  | 6.02E-18  | 2.37 (2.12-2.65) | 9.02E-54  | 0.96  | 0                     | 2.37 (2.07-2.71) | 7.81E-70      |  |
| rs2239806       | 32411307 | C/T       | 0.33 | 0.18    | I/O         | 2.48 (2.04-3.00)                  | 2.53E-20  | 2.30 (2.07-2.57) | 3.12E-51  | 0.52  | 0                     | 2.35 (2.06-2.68) | 8.01E-70      |  |
| rs3117583       | 31619576 | A/G       | 0.33 | 0.18    | I/O         | 2.35 (1.94-2.86)                  | 6.81E-18  | 2.37 (2.13-2.65) | 1.55E-53  | 0.94  | 0                     | 2.37 (2.07-2.71) | 1.50E-69      |  |
| rs642093        | 32582075 | G/A       | 0.38 | 0.23    | I/O         | 2.18 (1.81-2.62)                  | 1.48E-16  | 2.29 (2.06-2.54) | 6.59E-55  | 0.65  | 0                     | 2.26 (1.99-2.56) | 2.13E-69      |  |
| rs116750281     | 32412809 | T/A       | 0.33 | 0.18    | I/I         | 2.45 (2.02-2.96)                  | 6.59E-20  | 2.29 (2.06-2.55) | 3.80E-51  | 0.56  | 0                     | 2.34 (2.05-2.66) | 2.57E-69      |  |
| rs114686292     | 32412566 | T/A       | 0.33 | 0.18    | I/I         | 2.44 (2.01-2.95)                  | 1.03E-19  | 2.30 (2.06-2.56) | 2.42E-51  | 0.60  | 0                     | 2.33 (2.05-2.66) | 2.60E-69      |  |
| rs115340233     | 32447873 | A/G       | 0.24 | 0.42    | I/I         | 0.36 (0.30-0.44)                  | 2.83E-23  | 0.45 (0.41-0.51) | 7.43E-48  | 0.06  | 73                    | 0.43 (0.37-0.49) | 2.80E-69      |  |
| rs143655145     | 32340176 | C/T       | 0.37 | 0.21    | I/I         | 2.26 (1.87-2.73)                  | 2.81E-17  | 2.26 (2.04-2.50) | 6.20E-54  | 0.99  | 0                     | 2.26 (1.99-2.56) | 2.84E-69      |  |
| rs3130626       | 31598489 | A/G       | 0.33 | 0.18    | I/O         | 2.36 (1.94-2.86)                  | 6.11E-18  | 2.37 (2.12-2.64) | 3.59E-53  | 0.97  | 0                     | 2.36 (2.07-2.70) | 3.03E-69      |  |
| rs2856723       | 32667762 | G/A       | 0.59 | 0.40    | I/I         | 2.38 (2.00-2.84)                  | 1.31E-22  | 2.04 (1.86-2.25) | 2.29E-48  | 0.13  | 57                    | 2.13 (1.90-2.40) | 3.59E-69      |  |
| chr6:32382363:D | 32382363 | AG/A      | 0.32 | 0.18    | I/I         | 2.45 (2.01-2.97)                  | 2.84E-19  | 2.31 (2.07-2.57) | 1.65E-51  | 0.61  | 0                     | 2.35 (2.05-2.68) | 4.99E-69      |  |
| rs3135393       | 32408842 | A/G       | 0.33 | 0.18    | I/O         | 2.44 (2.01-2.95)                  | 1.22E-19  | 2.32 (2.08-2.58) | 4.61E-51  | 0.65  | 0                     | 2.35 (2.06-2.68) | 5.80E-69      |  |
| rs143788567     | 32447900 | T/C       | 0.24 | 0.42    | I/I         | 0.36 (0.30-0.44)                  | 2.83E-23  | 0.46 (0.41-0.51) | 1.93E-47  | 0.05  | 73                    | 0.43 (0.37-0.49) | 7.35E-69      |  |
| rs2524074       | 31244021 | A/G       | 0.48 | 0.31    | I/O         | 2.22 (1.88-2.63)                  | 1.95E-20  | 2.11 (1.91-2.33) | 4.56E-50  | 0.60  | 0                     | 2.14 (1.90-2.41) | 8.89E-69      |  |
| rs1264350       | 30796545 | T/C       | 0.26 | 0.13    | I/O         | 2.50 (2.03-3.08)                  | 7.50E-18  | 2.53 (2.25-2.85) | 1.07E-52  | 0.91  | 0                     | 2.52 (2.18-2.91) | 1.08E-68      |  |
| rs142520578     | 31861815 | A/G       | 0.50 | 0.33    | I/I         | 2.26 (1.91-2.67)                  | 1.73E-21  | 2.06 (1.87-2.27) | 9.17E-49  | 0.36  | 0                     | 2.12 (1.88-2.38) | 1.66E-68      |  |
| rs115543501     | 32380785 | G/A       | 0.34 | 0.52    | I/I         | 0.40 (0.33-0.47)                  | 1.48E-24  | 0.49 (0.45-0.54) | 9.36E-46  | 0.03  | 78                    | 0.46 (0.41-0.52) | 2.73E-68      |  |
| rs114907058     | 32148403 | G/C       | 0.32 | 0.17    | I/I         | 2.20 (1.82-2.67)                  | 7.78E-16  | 2.40 (2.15-2.68) | 1.43E-54  | 0.44  | 0                     | 2.35 (2.05-2.68) | 2.88E-68      |  |
| rs115004569     | 32148031 | A/G       | 0.32 | 0.17    | I/I         | 2.20 (1.82-2.67)                  | 7.78E-16  | 2.40 (2.15-2.68) | 1.43E-54  | 0.44  | 0                     | 2.35 (2.05-2.68) | 2.88E-68      |  |
| rs145301992     | 32416467 | G/A       | 0.34 | 0.19    | I/I         | 2.48 (2.05-3.00)                  | 5.73E-21  | 2.23 (2.00-2.48) | 5.33E-49  | 0.33  | 0                     | 2.29 (2.01-2.61) | 3.11E-68      |  |
| rs3130349       | 32147696 | G/A       | 0.32 | 0.17    | I/O         | 2.20 (1.82-2.67)                  | 9.09E-16  | 2.40 (2.15-2.68) | 3.94E-54  | 0.45  | 0                     | 2.34 (2.05-2.68) | 8.86E-68      |  |
| rs114056809     | 32415426 | A/G       | 0.34 | 0.20    | I/I         | 2.45 (2.03-2.96)                  | 1.34E-20  | 2.22 (2.00-2.47) | 7.59E-49  | 0.37  | 0                     | 2.28 (2.01-2.60) | 1.02E-67      |  |
| rs6926737       | 32375745 | G/A       | 0.34 | 0.52    | I/O</       |                                   |           |                  |           |       |                       |                  |               |  |



**Supplementary Table 3.** Association analysis in HLA

| SNP             | BP       | Alleles   |      | MAF     |             | Observed or Imputed in Dataset1/2 | Dataset 1 |                  | Dataset 2 |                | Test of heterogeneity |                  | Meta analysis |  |
|-----------------|----------|-----------|------|---------|-------------|-----------------------------------|-----------|------------------|-----------|----------------|-----------------------|------------------|---------------|--|
|                 |          | maj / min | Case | Control | OR (95% CI) |                                   | P         | OR (95% CI)      | P         | P <sub>Q</sub> | I <sup>2</sup>        | OR (95% CI)      | P             |  |
|                 |          |           |      |         |             |                                   |           |                  |           |                |                       |                  |               |  |
| rs9268501       | 32376882 | T/G       | 0.34 | 0.52    | I/I         | 0.40 (0.34-0.48)                  | 3.18E-24  | 0.50 (0.45-0.55) | 1.89E-45  | 0.04           | 76                    | 0.47 (0.42-0.53) | 1.12E-67      |  |
| rs6906730       | 32379445 | T/C       | 0.34 | 0.52    | I/I         | 0.40 (0.33-0.47)                  | 1.34E-24  | 0.50 (0.45-0.55) | 4.16E-45  | 0.03           | 80                    | 0.47 (0.41-0.53) | 1.19E-67      |  |
| rs115339716     | 32383633 | G/C       | 0.33 | 0.18    | I/I         | 2.39 (1.97-2.90)                  | 1.84E-18  | 2.29 (2.06-2.56) | 5.94E-51  | 0.73           | 0                     | 2.32 (2.03-2.65) | 1.20E-67      |  |
| rs116780814     | 32358942 | T/A       | 0.24 | 0.42    | I/I         | 0.42 (0.35-0.50)                  | 4.52E-20  | 0.45 (0.40-0.50) | 3.95E-49  | 0.54           | 0                     | 0.44 (0.38-0.50) | 1.79E-67      |  |
| rs139903235     | 32237508 | A/G       | 0.37 | 0.21    | I/I         | 2.02 (1.69-2.42)                  | 1.98E-14  | 2.31 (2.08-2.57) | 1.71E-55  | 0.21           | 37                    | 2.23 (1.96-2.52) | 2.09E-67      |  |
| rs114298976     | 32377116 | C/G       | 0.34 | 0.52    | I/I         | 0.40 (0.34-0.48)                  | 3.35E-24  | 0.50 (0.45-0.55) | 3.39E-45  | 0.04           | 77                    | 0.47 (0.42-0.53) | 2.16E-67      |  |
| rs116707546     | 32377061 | C/T       | 0.34 | 0.52    | I/I         | 0.40 (0.34-0.48)                  | 3.35E-24  | 0.50 (0.45-0.55) | 3.39E-45  | 0.04           | 77                    | 0.47 (0.42-0.53) | 2.16E-67      |  |
| rs3763314       | 32376618 | C/T       | 0.34 | 0.52    | I/I         | 0.40 (0.34-0.48)                  | 3.40E-24  | 0.50 (0.45-0.55) | 3.40E-45  | 0.04           | 77                    | 0.47 (0.42-0.53) | 2.18E-67      |  |
| rs5007263       | 32378982 | A/G       | 0.34 | 0.52    | I/O         | 0.40 (0.34-0.48)                  | 3.90E-24  | 0.50 (0.45-0.55) | 3.01E-45  | 0.04           | 76                    | 0.47 (0.42-0.53) | 2.20E-67      |  |
| rs112833847     | 32583122 | G/C       | 0.38 | 0.23    | I/I         | 2.16 (1.79-2.60)                  | 4.45E-16  | 2.26 (2.04-2.51) | 2.65E-53  | 0.67           | 0                     | 2.23 (1.97-2.53) | 2.45E-67      |  |
| rs5007258       | 32379239 | A/G       | 0.34 | 0.52    | I/I         | 0.40 (0.34-0.48)                  | 3.11E-24  | 0.50 (0.45-0.55) | 4.09E-45  | 0.04           | 77                    | 0.47 (0.42-0.53) | 2.46E-67      |  |
| rs5007265       | 32378866 | T/G       | 0.34 | 0.52    | I/O         | 0.40 (0.34-0.48)                  | 3.35E-24  | 0.50 (0.45-0.55) | 4.00E-45  | 0.04           | 77                    | 0.47 (0.42-0.53) | 2.58E-67      |  |
| rs5007260       | 32379047 | G/A       | 0.34 | 0.52    | I/I         | 0.40 (0.34-0.48)                  | 2.84E-24  | 0.50 (0.45-0.55) | 6.02E-45  | 0.03           | 78                    | 0.47 (0.42-0.53) | 3.41E-67      |  |
| rs9268513       | 32378787 | T/C       | 0.34 | 0.52    | I/I         | 0.40 (0.34-0.48)                  | 3.49E-24  | 0.50 (0.45-0.55) | 5.15E-45  | 0.04           | 77                    | 0.47 (0.42-0.53) | 3.48E-67      |  |
| rs5007261       | 32379031 | G/A       | 0.34 | 0.52    | I/I         | 0.40 (0.34-0.48)                  | 3.35E-24  | 0.50 (0.45-0.55) | 5.40E-45  | 0.04           | 77                    | 0.47 (0.42-0.53) | 3.53E-67      |  |
| rs5007259       | 32379101 | T/C       | 0.34 | 0.52    | I/O         | 0.40 (0.34-0.48)                  | 3.35E-24  | 0.50 (0.45-0.55) | 5.42E-45  | 0.04           | 77                    | 0.47 (0.42-0.53) | 3.54E-67      |  |
| rs5007266       | 32378834 | T/C       | 0.34 | 0.52    | I/I         | 0.40 (0.34-0.48)                  | 3.36E-24  | 0.50 (0.45-0.55) | 6.22E-45  | 0.04           | 77                    | 0.47 (0.42-0.53) | 4.09E-67      |  |
| rs5007262       | 32379011 | A/G       | 0.34 | 0.52    | I/I         | 0.40 (0.34-0.48)                  | 3.58E-24  | 0.50 (0.45-0.55) | 5.86E-45  | 0.04           | 77                    | 0.47 (0.42-0.53) | 4.10E-67      |  |
| rs1329887       | 32410691 | G/A       | 0.33 | 0.18    | I/O         | 2.38 (1.97-2.89)                  | 5.83E-19  | 2.28 (2.05-2.55) | 7.11E-50  | 0.70           | 0                     | 2.31 (2.03-2.64) | 4.30E-67      |  |
| rs114298033     | 32584440 | C/T       | 0.38 | 0.23    | I/I         | 2.15 (1.78-2.58)                  | 7.04E-16  | 2.26 (2.04-2.50) | 2.90E-53  | 0.65           | 0                     | 2.23 (1.96-2.53) | 4.57E-67      |  |
| rs3095326       | 30725841 | C/T       | 0.24 | 0.12    | I/O         | 2.63 (2.12-3.26)                  | 6.73E-19  | 2.52 (2.23-2.85) | 1.34E-49  | 0.73           | 0                     | 2.55 (2.20-2.96) | 9.25E-67      |  |
| rs2143462       | 32335204 | G/A       | 0.32 | 0.18    | I/O         | 2.19 (1.80-2.65)                  | 1.95E-15  | 2.37 (2.12-2.64) | 3.94E-53  | 0.48           | 0                     | 2.31 (2.03-2.64) | 1.89E-66      |  |
| rs3129973       | 30721143 | C/T       | 0.24 | 0.12    | I/O         | 2.63 (2.12-3.25)                  | 7.30E-19  | 2.52 (2.23-2.84) | 3.58E-49  | 0.72           | 0                     | 2.55 (2.20-2.95) | 2.65E-66      |  |
| rs3817973       | 32361111 | C/T       | 0.26 | 0.44    | I/O         | 0.42 (0.35-0.51)                  | 4.24E-20  | 0.47 (0.42-0.52) | 7.17E-48  | 0.36           | 0                     | 0.45 (0.40-0.51) | 3.00E-66      |  |
| rs2076529       | 32363955 | T/C       | 0.26 | 0.44    | I/O         | 0.42 (0.35-0.51)                  | 4.24E-20  | 0.47 (0.42-0.52) | 9.58E-48  | 0.34           | 0                     | 0.46 (0.40-0.52) | 4.01E-66      |  |
| rs537160        | 31916400 | G/A       | 0.51 | 0.34    | O/O         | 2.28 (1.93-2.70)                  | 1.43E-21  | 2.01 (1.82-2.21) | 4.84E-46  | 0.20           | 39                    | 2.08 (1.85-2.34) | 7.89E-66      |  |
| rs4424066       | 32354428 | A/G       | 0.26 | 0.44    | I/O         | 0.42 (0.35-0.51)                  | 4.24E-20  | 0.47 (0.42-0.52) | 2.28E-47  | 0.33           | 0                     | 0.46 (0.40-0.52) | 9.54E-66      |  |
| rs674313        | 32578082 | C/T       | 0.39 | 0.24    | O/I         | 2.16 (1.80-2.59)                  | 1.72E-16  | 2.22 (2.00-2.46) | 3.59E-51  | 0.80           | 0                     | 2.20 (1.94-2.49) | 1.00E-65      |  |
| rs3129974       | 30723169 | A/G       | 0.24 | 0.12    | I/I         | 2.66 (2.14-3.30)                  | 5.65E-19  | 2.49 (2.20-2.82) | 2.91E-48  | 0.61           | 0                     | 2.54 (2.19-2.95) | 1.63E-65      |  |
| chr6:32392268:I | 32392268 | A/AT      | 0.33 | 0.18    | I/I         | 2.58 (2.12-3.15)                  | 8.24E-21  | 2.26 (2.02-2.53) | 2.82E-46  | 0.26           | 21                    | 2.35 (2.05-2.69) | 2.36E-65      |  |
| rs139597191     | 30722267 | C/A       | 0.24 | 0.12    | I/I         | 2.67 (2.15-3.31)                  | 4.25E-19  | 2.49 (2.20-2.81) | 6.33E-48  | 0.58           | 0                     | 2.54 (2.19-2.95) | 2.64E-65      |  |
| rs3115557       | 32239651 | C/T       | 0.37 | 0.21    | I/O         | 2.02 (1.68-2.42)                  | 3.12E-14  | 2.22 (2.01-2.46) | 7.74E-53  | 0.37           | 0                     | 2.16 (1.91-2.45) | 8.97E-65      |  |
| rs9268176       | 32274079 | C/T       | 0.37 | 0.21    | I/O         | 2.02 (1.68-2.42)                  | 3.12E-14  | 2.22 (2.00-2.46) | 7.90E-53  | 0.37           | 0                     | 2.16 (1.91-2.45) | 9.10E-65      |  |
| rs11505897      | 32279816 | G/A       | 0.37 | 0.21    | I/I         | 2.01 (1.68-2.41)                  | 5.49E-14  | 2.23 (2.01-2.47) | 6.30E-53  | 0.33           | 0                     | 2.16 (1.91-2.45) | 1.43E-64      |  |
| rs3132931       | 32235895 | T/G       | 0.37 | 0.21    | I/O         | 2.02 (1.68-2.42)                  | 3.38E-14  | 2.21 (2.00-2.45) | 1.65E-52  | 0.39           | 0                     | 2.15 (1.90-2.44) | 2.00E-64      |  |
| rs115851975     | 32223418 | C/T       | 0.37 | 0.21    | I/I         | 2.01 (1.68-2.41)                  | 3.93E-14  | 2.21 (2.00-2.45) | 2.16E-52  | 0.38           | 0                     | 2.15 (1.90-2.44) | 3.12E-64      |  |
| rs9268207       | 32280462 | C/T       | 0.37 | 0.21    | I/I         | 2.02 (1.68-2.42)                  | 3.12E-14  | 2.21 (1.99-2.44) | 3.38E-52  | 0.41           | 0                     | 2.15 (1.90-2.44) | 3.59E-64      |  |
| rs142502522     | 32230344 | T/A       | 0.37 | 0.21    | I/I         | 2.00 (1.67-2.40)                  | 6.59E-14  | 2.21 (2.00-2.45) | 1.59E-52  | 0.35           | 0                     | 2.15 (1.90-2.44) | 4.25E-64      |  |
| rs115365372     | 32415080 | G/A       | 0.36 | 0.21    | I/I         | 2.41 (2.00-2.90)                  | 1.70E-20  | 2.13 (1.91-2.36) | 2.74E-45  | 0.25           | 25                    | 2.20 (1.94-2.50) | 4.90E-64      |  |
| rs3891176       | 32634318 | C/A       | 0.35 | 0.20    | I/I         | 1.98 (1.65-2.38)                  | 3.18E-13  | 2.37 (2.12-2.65) | 2.22E-53  | 0.10           | 64                    | 2.25 (1.98-2.57) | 4.93E-64      |  |
| rs144261627     | 32237748 | G/A       | 0.37 | 0.21    | I/I         | 2.02 (1.69-2.42)                  | 2.77E-14  | 2.20 (1.99-2.44) | 5.88E-52  | 0.42           | 0                     | 2.15 (1.90-2.43) | 5.29E-64      |  |
| rs3129985       | 30762542 | C/T       | 0.25 | 0.12    | I/O         | 2.58 (2.08-3.19)                  | 2.61E-18  | 2.44 (2.16-2.75) | 2.19E-47  | 0.66           | 0                     | 2.48 (2.14-2.87) | 5.67E-64      |  |
| rs3130673       | 30746519 | G/T       | 0.25 | 0.12    | I/O         | 2.58 (2.09-3.20)                  | 2.40E-18  | 2.43 (2.15-2.74) | 4.25E-47  | 0.62           | 0                     | 2.47 (2.14-2.86) | 1.00E-63      |  |
| chr6:32253524:D | 32253524 | AG/A      | 0.37 | 0.21    | I/I         | 2.01 (1.68-2.41)                  | 4.64E-14  | 2.20 (1.99-2.44) | 7.18E-52  | 0.39           | 0                     | 2.14 (1.89-2.43) | 1.17E-63      |  |
| rs3130641       | 30764081 | C/T       | 0.25 | 0.12    | I/O         | 2.59 (2.09-3.20)                  | 2.01E-18  | 2.42 (2.15-2.73) | 8.56E-47  | 0.60           | 0                     | 2.47 (2.13-2.86) | 1.68E-63      |  |
| rs3129812       | 30337974 | G/A       | 0.22 | 0.10    | I/O         | 2.61 (2.09-3.25)                  | 2.04E-17  | 2.59 (2.27-2.94) | 7.94E-48  | 0.95           | 0                     | 2.59 (2.22-3.02) | 1.74E-63      |  |
| rs3130351       | 30328192 | C/T       | 0.22 | 0.10    | I/O         | 2.66 (2.13-3.32)                  | 3.46E-18  | 2.56 (2.25-2.90) | 5.21E-47  | 0.75           | 0                     | 2.59 (2.22-3.02) | 1.77E-63      |  |
| rs3131060       | 30763291 | G/A       | 0.25 | 0.12    | I/O         | 2.59 (2.09-3.20)                  | 2.02E-18  | 2.42 (2.14-2.73) | 1.19E-46  | 0.58           | 0                     | 2.46 (2.13-2.85) | 2.33E-63      |  |
| chr6:32268795:I | 32268795 | A/ATTGT   | 0.37 | 0.22    | I/I         | 1.99 (1.66-2.38)                  | 5.69E-14  | 2.19 (1.98-2.43) | 1.31E-51  | 0.35           | 0                     | 2.13 (1.89-2.41) | 2.52E-63      |  |
| rs3891174       | 32634584 | C/G       | 0.35 | 0.20    | I/I         | 1.99 (1.66-2.39)                  | 2.27E-13  | 2.37 (2.12-2.65) | 2.19E-52  | 0.11           | 62                    | 2.26 (1.98-2.57) | 2.79E-63      |  |
| rs114323122     | 30762238 | A/G       | 0.25 | 0.12    | I/I         | 2.58 (2.09-3.20)                  | 2.18E-18  | 2.41 (2.14-2.72) | 1.57E-46  | 0.58           | 0                     | 2.46 (2.12-2.85) | 3.30E-63      |  |
| rs115602769     | 30758848 | T/A       | 0.25 | 0.12    | I/I         | 2.57 (2.08-3.18)                  | 3.33E-18  | 2.41 (2.14-2.72) | 1.42E-46  | 0.60           | 0                     | 2.46 (2.12-2.84) | 4.59E-63      |  |
| rs148072391     | 30761132 | C/T       | 0.25 | 0.12    | I/I         | 2.59 (2.10-3.21)                  | 1.81E-18  | 2.41 (2.14-2.72) | 3.02E-46  | 0.57           | 0                     | 2.46 (2.13-2.85) | 5.27E-63      |  |
| rs3129815       | 30340528 | G/A       | 0.22 | 0.10    | I/O         | 2.62 (2.11-3.27)                  | 7.37E-18  | 2.56 (2.25-2.91) | 8.17E-47  | 0.84           | 0                     | 2.58 (2.21-3.01) | 6.00E-63      |  |
| rs3130340       | 32244627 | T/C       | 0.38 | 0.22    | I/O         | 1.97 (1.65-2.35)                  | 7.22E-14  | 2.18 (1.97-2.41) | 2.38E-51  | 0.33           | 0                     | 2.12 (1.87-2.39) | 6.02E-63      |  |
| rs11677428      | 30327196 | G/A       | 0.22 | 0.10    | I/I         | 2.63 (2.11-3.27)                  | 8.43E-18  | 2.56 (2.25-2.91) | 7.53E-47  | 0.85           | 0                     | 2.58 (2.21-3.01) | 6.36E-63      |  |
| rs116265156     | 30760190 | C/T       | 0.25 | 0.12    | I/I         | 2.56 (2.07-3.17)                  | 5.19E-18  | 2.42 (2.14-2.73) | 1.32E-46  | 0.65           | 0                     | 2.46 (2.12-2.84) | 6.73E-63      |  |
| rs140735808     | 30759489 | A/G       | 0.25 | 0.12    | I/I         | 2.57 (2.08-3.18)                  | 3.78E-18  | 2.41 (2.14-2.72) | 1.85E-46  | 0.61           | 0                     | 2.45 (2.12-2.84) | 6.81E-63      |  |
| rs116485842     | 30760907 | T/C       | 0.24 | 0.12    | I/I         | 2.59 (2.09-3.20)                  | 2.12E-18  | 2.41 (2.14-2.72) | 3.55E-46  | 0.57           | 0                     | 2.46 (2.12-2.85) | 7.25E-63      |  |
| rs3131055       | 30761487 | T/C       | 0.25 | 0.12    | I/I         | 2.59 (2.09-3.20)                  | 2.05E-18  | 2.41 (2.13-2.71) | 3.67E-46  | 0.56           | 0                     | 2.46 (2.12-2.84) | 7.25E-63      |  |
| rs115436129     | 30327194 | G/A       | 0.22 | 0.10    | I/I         | 2.63 (2.11-3.27)                  | 8.43E-18  | 2.55 (2.24-2.90) | 8.72E-47  | 0.82           | 0                     | 2.57 (2.20-3.00) | 7.35E-63      |  |
| rs139214286     | 30759335 | T/C       | 0.25 | 0.12    | I/I         | 2.57 (2.08-3.18)                  | 3.78E-18  | 2.41 (2.14-2.72) | 2.06E-46  | 0.61           | 0                     | 2.45 (2.12-2.84) | 7.58E-63      |  |
| rs377763        | 32199144 | C/A       | 0.36 | 0.21    | I/O         | 2.18 (1.81-2.64)                  | 6.06E-16  | 2.20 (1.98-2.45) | 9.53E-49  | 0.93           | 0                     | 2.20 (1.93-2.50) | 8.21E-63      |  |
| rs9275511       | 32674329 | G/A       | 0.30 | 0.47    | I/I         | 0.45 (0.37-0.53)                  | 1.23E-18  | 0.49 (0.44-0.54) | 7.00E-46  | 0.42           | 0                     | 0.47 (0.42-0.54) | 8.25E-63      |  |
| chr6:30760781:I | 30760781 | A/AC      | 0.24 | 0.12    | I/I         | 2.59 (2.09-3.20)                  | 2.12E-18  | 2.41 (2.13-2.72) | 4.25E-46  | 0.57           | 0                     | 2.46 (2.12-2.85) | 8.68E-63      |  |
| chr6:30758648:D | 30758648 | indel/A   | 0.25 | 0.12    | I/I         | 2.58 (2.08-3.19)                  | 2.55E-18  | 2.40 (2.13-2.71) | 3.73E-46  | 0.57           | 0                     | 2.45 (2.12-2.84) | 9.18E-63      |  |
| rs116503526     | 30758664 | A/C       | 0.25 | 0.12    | I/I         | 2.58 (2.08-3.19)                  | 2.55E-18  | 2.40 (2.13-2.71) | 3.73E-46  | 0.57           | 0                     | 2.45 (2.12-2.84) | 9.18E-63      |  |
| rs3131050       | 30760025 | T/C       | 0.25 | 0.12    | I/O         | 2.56 (2.07-3.17)                  | 4.10E-18  | 2.41 (2.13-2.72) | 2.35E-46  | 0.61           | 0                     | 2.45 (2.12-2.84) | 9.36E-63      |  |
| rs1018430       | 32281688 | C/T       | 0.38 | 0.23    | I/O         | 1.97 (1.65-2.35)                  | 7.22E-14  | 2.17 (1.96-2.40) | 4.15E-51  | 0.34           | 0                     | 2.11 (1.87-2.39) | 1.01E-62      |  |
| rs138701803     | 32231407 | G/A       | 0.37 | 0.21    | I/I         | 1                                 |           |                  |           |                |                       |                  |               |  |

**Supplementary Table 4: Association of HLA classical alleles with Sjögren's syndrome.**

| HLA allele    | Allele frequency <sup>a</sup> |         | Dataset 1        |          | Dataset 2        |          | Meta-analysis    |          |
|---------------|-------------------------------|---------|------------------|----------|------------------|----------|------------------|----------|
|               | Case                          | Control | OR (95% CI)      | <i>P</i> | OR (95% CI)      | <i>P</i> | OR (95% CI)      | <i>P</i> |
| HLA-DQB1*0201 | 0.30                          | 0.13    | 3.14 (2.51-3.92) | 7.82E-24 | 3.46 (3.03-3.95) | 4.53E-74 | 3.36 (2.86-3.94) | 1.38E-95 |
| HLA-DQA1*0501 | 0.30                          | 0.13    | 3.11 (2.48-3.89) | 3.38E-23 | 3.45 (3.02-3.95) | 6.87E-73 | 3.34 (2.85-3.93) | 8.50E-94 |
| HLA-B*0801    | 0.31                          | 0.13    | 3.49 (2.76-4.40) | 1.13E-25 | 3.18 (2.78-3.64) | 6.87E-63 | 3.27 (2.77-3.86) | 1.09E-86 |
| HLA-C*0701    | 0.32                          | 0.16    | 2.74 (2.23-3.36) | 7.18E-22 | 2.71 (2.41-3.05) | 2.95E-61 | 2.72 (2.35-3.14) | 3.67E-81 |
| HLA-DRB1*0301 | 0.34                          | 0.16    | 2.99 (2.34-3.82) | 2.29E-18 | 3.37 (2.91-3.91) | 2.87E-58 | 3.25 (2.72-3.88) | 2.19E-74 |
| HLA-A*0101    | 0.27                          | 0.17    | 1.88 (1.53-2.30) | 1.31E-09 | 1.89 (1.68-2.12) | 6.46E-27 | 1.88 (1.64-2.17) | 6.74E-35 |
| HLA-DQB1*0302 | 0.06                          | 0.12    | 0.45 (0.32-0.63) | 4.02E-06 | 0.44 (0.36-0.54) | 7.19E-16 | 0.44 (0.35-0.57) | 1.79E-20 |
| HLA-DQA1*0101 | 0.06                          | 0.12    | 0.44 (0.31-0.63) | 4.61E-06 | 0.46 (0.38-0.56) | 3.68E-15 | 0.45 (0.36-0.58) | 9.78E-20 |
| HLA-DPB1*0101 | 0.13                          | 0.06    | 1.96 (1.44-2.68) | 2.25E-05 | 2.12 (1.75-2.56) | 5.87E-15 | 2.07 (1.65-2.60) | 8.42E-19 |
| HLA-DQA1*0301 | 0.05                          | 0.10    | 0.44 (0.30-0.64) | 1.74E-05 | 0.42 (0.33-0.52) | 3.45E-14 | 0.42 (0.32-0.56) | 3.44E-18 |
| HLA-DRB1*0101 | 0.04                          | 0.11    | 0.33 (0.21-0.53) | 2.84E-06 | 0.40 (0.31-0.51) | 8.90E-13 | 0.38 (0.28-0.52) | 1.30E-17 |
| HLA-DQB1*0501 | 0.07                          | 0.13    | 0.47 (0.34-0.66) | 9.74E-06 | 0.52 (0.44-0.62) | 8.11E-13 | 0.51 (0.40-0.63) | 4.03E-17 |
| HLA-DRB1*0401 | 0.04                          | 0.09    | 0.30 (0.19-0.48) | 4.95E-07 | 0.43 (0.33-0.56) | 2.97E-10 | 0.39 (0.28-0.53) | 9.92E-16 |
| HLA-DQB1*0602 | 0.20                          | 0.14    | 1.97 (1.58-2.45) | 1.91E-09 | 1.35 (1.19-1.53) | 5.66E-06 | 1.51 (1.29-1.77) | 1.34E-12 |
| HLA-DQA1*0201 | 0.09                          | 0.14    | 0.55 (0.41-0.74) | 8.92E-05 | 0.64 (0.54-0.76) | 2.34E-07 | 0.61 (0.50-0.75) | 9.74E-11 |
| HLA-DRB1*0701 | 0.10                          | 0.16    | 0.54 (0.39-0.74) | 1.04E-04 | 0.63 (0.53-0.76) | 5.45E-07 | 0.60 (0.48-0.75) | 2.63E-10 |
| HLA-C*0304    | 0.06                          | 0.09    | 0.65 (0.47-0.90) | 9.33E-03 | 0.56 (0.46-0.69) | 1.13E-08 | 0.59 (0.47-0.75) | 5.57E-10 |
| HLA-DRB1*1501 | 0.24                          | 0.19    | 1.89 (1.50-2.38) | 7.06E-08 | 1.26 (1.10-1.45) | 8.33E-04 | 1.43 (1.21-1.68) | 8.54E-09 |
| HLA-B*1501    | 0.05                          | 0.08    | 0.35 (0.22-0.55) | 5.16E-06 | 0.68 (0.54-0.84) | 3.91E-04 | 0.55 (0.41-0.73) | 4.09E-08 |

a. Allele frequency was calculated in combined datasets 1 and 2.

**Supplementary Table 5: MHC-RFX5 hypergeometric analysis for enrichment in DS1.**

a.

| Total number of variants in MHC from DS1 | Number of variants overlapping with RFX5 binding site from DS1 | Total number of significant variants in MHC from DS1 | Number of significant variants overlapping with RFX5 binding site from DS1 | OR   | <i>P</i>              |
|------------------------------------------|----------------------------------------------------------------|------------------------------------------------------|----------------------------------------------------------------------------|------|-----------------------|
| 37906                                    | 664                                                            | 9169                                                 | 216                                                                        | 1.52 | 9.25×10 <sup>-7</sup> |

b.

|                       | Overlap with RFX5 binding site | Not overlap with RFX5 binding site | Total |
|-----------------------|--------------------------------|------------------------------------|-------|
| Selected variants     | <b>216</b>                     | 9169-216= <b>8953</b>              | 9196  |
| Non-selected variants | 664-216= <b>448</b>            | 37906-9196-448= <b>28289</b>       | 28737 |
| Total                 | 664                            | 37242                              | 37906 |

**Supplementary Table 6: Results from *cis*-eQTL analyses in Sjögren's syndrome-associated regions.**

| eQTL in region  | SNP         | Probe ID     | <i>P</i> | FDR      |
|-----------------|-------------|--------------|----------|----------|
| <i>HLA-H</i>    | rs113258639 | ILMN_1666078 | 9.69E-46 | 1.35E-43 |
| <i>HLA-DRB6</i> | rs114846898 | ILMN_2066060 | 4.84E-33 | 2.57E-31 |
| <i>HLA-C</i>    | rs116682067 | ILMN_1721113 | 1.17E-18 | 1.35E-17 |
| <i>HLA-DPB1</i> | rs3128917   | ILMN_1749070 | 3.23E-15 | 3.23E-14 |
| <i>HLA-DQA1</i> | rs112038669 | ILMN_1808405 | 1.37E-13 | 1.27E-12 |
| <i>HLA-G</i>    | rs113258639 | ILMN_1656670 | 3.51E-12 | 2.22E-11 |
| <i>HLA-A</i>    | rs113258639 | ILMN_1671054 | 8.31E-12 | 5.02E-11 |
| <i>IL12A</i>    | rs4680536   | ILMN_1671353 | 5.95E-03 | 2.04E-02 |
| <i>IL12A</i>    | rs485497    | ILMN_1671353 | 2.74E-02 | 3.86E-02 |
| <i>BLK</i>      | rs2409781   | ILMN_1668277 | 7.49E-05 | 7.84E-03 |
| <i>BLK</i>      | rs2736345   | ILMN_1668277 | 2.55E-03 | 3.63E-02 |
| <i>FAM167A</i>  | rs4840568   | ILMN_1687213 | 1.19E-20 | 1.94E-18 |
| <i>TNIP1</i>    | rs73272842  | ILMN_1703650 | 2.53E-04 | 2.80E-03 |
| <i>TNIP1</i>    | rs6579837   | ILMN_1703650 | 5.98E-03 | 8.63E-03 |

**Supplementary Table 7.** Association analysis in *IRF5*

| SNP              | BP        | Alleles  |      | MAF     |             | Observed or Imputed in Dataset1/2 | Dataset 1 |                  | Dataset 2 |                | Test of heterogeneity |                  | Meta analysis |   |
|------------------|-----------|----------|------|---------|-------------|-----------------------------------|-----------|------------------|-----------|----------------|-----------------------|------------------|---------------|---|
|                  |           | maj/ min | Case | Control | OR (95% CI) |                                   | P         | OR (95% CI)      | P         | P <sub>Q</sub> | I <sup>2</sup>        | OR (95% CI)      | P             |   |
|                  |           |          |      |         |             |                                   |           |                  |           |                |                       |                  |               |   |
| rs4728141        | 128567032 | T/C      | 0.54 | 0.47    | I/-         | 1.34 (1.13-1.58)                  | 7.18E-04  | -                | -         | -              | -                     | -                | -             | - |
| rs3757387        | 128576086 | T/C      | 0.54 | 0.45    | I/I         | 1.31 (1.11-1.54)                  | 1.49E-03  | 1.50 (1.37-1.64) | 7.50E-18  | 0.16           | 50                    | 1.44 (1.29-1.62) | 2.73E-19      |   |
| chr7:128575797:D | 128575797 | indel/T  | 0.54 | 0.45    | I/I         | 1.31 (1.11-1.54)                  | 1.49E-03  | 1.50 (1.37-1.65) | 7.64E-18  | 0.15           | 51                    | 1.44 (1.29-1.62) | 2.77E-19      |   |
| rs3778754        | 128575552 | C/G      | 0.56 | 0.47    | I/I         | 1.30 (1.10-1.53)                  | 2.04E-03  | 1.49 (1.36-1.64) | 2.90E-17  | 0.15           | 52                    | 1.44 (1.28-1.61) | 1.39E-18      |   |
| rs3823536        | 128579666 | G/A      | 0.55 | 0.47    | I/I         | 1.29 (1.09-1.52)                  | 3.04E-03  | 1.48 (1.35-1.62) | 2.02E-16  | 0.16           | 50                    | 1.42 (1.27-1.59) | 1.35E-17      |   |
| rs3778752        | 128580047 | G/T      | 0.55 | 0.46    | I/I         | 1.30 (1.09-1.54)                  | 2.80E-03  | 1.47 (1.34-1.62) | 9.39E-16  | 0.20           | 39                    | 1.42 (1.26-1.59) | 4.70E-17      |   |
| rs79775079       | 128580048 | A/T      | 0.55 | 0.46    | I/I         | 1.30 (1.09-1.54)                  | 2.80E-03  | 1.47 (1.34-1.62) | 9.39E-16  | 0.20           | 39                    | 1.42 (1.26-1.59) | 4.70E-17      |   |
| rs4728142        | 128573967 | G/A      | 0.53 | 0.44    | O/O         | 1.29 (1.09-1.52)                  | 2.85E-03  | 1.46 (1.33-1.60) | 2.05E-15  | 0.20           | 39                    | 1.40 (1.25-1.57) | 9.75E-17      |   |
| rs17339836       | 128681062 | C/T      | 0.18 | 0.12    | O/O         | 1.65 (1.32-2.06)                  | 8.53E-06  | 1.55 (1.37-1.75) | 5.73E-12  | 0.62           | 0                     | 1.58 (1.36-1.84) | 2.43E-16      |   |
| rs17338998       | 128618559 | C/T      | 0.18 | 0.12    | I/I         | 1.64 (1.32-2.05)                  | 9.51E-06  | 1.55 (1.37-1.75) | 5.70E-12  | 0.64           | 0                     | 1.57 (1.35-1.83) | 2.67E-16      |   |
| rs12706861       | 128616582 | C/T      | 0.18 | 0.12    | I/I         | 1.64 (1.32-2.05)                  | 9.51E-06  | 1.55 (1.37-1.75) | 5.88E-12  | 0.63           | 0                     | 1.57 (1.35-1.83) | 2.76E-16      |   |
| rs12539741       | 128596805 | C/T      | 0.18 | 0.12    | O/O         | 1.64 (1.32-2.05)                  | 9.62E-06  | 1.55 (1.36-1.75) | 7.26E-12  | 0.63           | 0                     | 1.57 (1.35-1.83) | 3.45E-16      |   |
| rs71581958       | 128665542 | C/T      | 0.18 | 0.12    | O/O         | 1.65 (1.32-2.06)                  | 8.52E-06  | 1.54 (1.36-1.75) | 9.03E-12  | 0.60           | 0                     | 1.57 (1.35-1.83) | 3.82E-16      |   |
| rs12535158       | 128625019 | C/T      | 0.18 | 0.12    | O/O         | 1.65 (1.32-2.06)                  | 8.49E-06  | 1.54 (1.36-1.75) | 9.37E-12  | 0.60           | 0                     | 1.57 (1.35-1.83) | 3.96E-16      |   |
| rs12536266       | 128611035 | G/A      | 0.18 | 0.12    | I/I         | 1.64 (1.32-2.05)                  | 9.51E-06  | 1.54 (1.36-1.75) | 8.59E-12  | 0.61           | 0                     | 1.57 (1.35-1.83) | 4.04E-16      |   |
| rs34725944       | 128641653 | T/C      | 0.18 | 0.12    | O/O         | 1.64 (1.32-2.05)                  | 9.62E-06  | 1.54 (1.36-1.75) | 8.72E-12  | 0.62           | 0                     | 1.57 (1.35-1.83) | 4.14E-16      |   |
| chr7:128622088:I | 128622088 | C/CT     | 0.18 | 0.12    | I/I         | 1.64 (1.32-2.05)                  | 9.51E-06  | 1.54 (1.36-1.75) | 1.02E-11  | 0.61           | 0                     | 1.57 (1.35-1.83) | 4.79E-16      |   |
| rs12531054       | 128644251 | G/T      | 0.18 | 0.12    | O/O         | 1.64 (1.32-2.05)                  | 9.62E-06  | 1.54 (1.36-1.74) | 1.06E-11  | 0.61           | 0                     | 1.57 (1.35-1.82) | 5.03E-16      |   |
| chr7:128633243:D | 128633243 | GT/G     | 0.18 | 0.12    | I/I         | 1.64 (1.32-2.05)                  | 9.51E-06  | 1.54 (1.36-1.74) | 1.09E-11  | 0.61           | 0                     | 1.57 (1.35-1.83) | 5.11E-16      |   |
| rs10488631       | 128594183 | T/C      | 0.18 | 0.12    | O/O         | 1.64 (1.32-2.05)                  | 9.65E-06  | 1.54 (1.36-1.74) | 1.13E-11  | 0.61           | 0                     | 1.57 (1.35-1.82) | 5.36E-16      |   |
| rs34871361       | 128671086 | C/T      | 0.18 | 0.12    | I/I         | 1.65 (1.32-2.06)                  | 8.52E-06  | 1.54 (1.36-1.74) | 1.38E-11  | 0.58           | 0                     | 1.57 (1.35-1.82) | 5.85E-16      |   |
| rs12539741       | 128596805 | T/C      | 0.18 | 0.12    | I/I         | 1.64 (1.32-2.05)                  | 9.62E-06  | 1.54 (1.36-1.74) | 1.31E-11  | 0.60           | 0                     | 1.57 (1.35-1.82) | 6.22E-16      |   |
| rs62478615       | 128684316 | G/C      | 0.18 | 0.12    | I/I         | 1.65 (1.32-2.06)                  | 8.67E-06  | 1.54 (1.36-1.74) | 1.45E-11  | 0.58           | 0                     | 1.57 (1.35-1.82) | 6.25E-16      |   |
| rs12531711       | 128617466 | A/G      | 0.18 | 0.12    | I/I         | 1.64 (1.32-2.05)                  | 9.51E-06  | 1.53 (1.36-1.74) | 1.56E-11  | 0.59           | 0                     | 1.57 (1.35-1.82) | 7.36E-16      |   |
| rs35188261       | 128683539 | G/A      | 0.18 | 0.12    | O/O         | 1.66 (1.33-2.06)                  | 6.88E-06  | 1.53 (1.35-1.73) | 2.30E-11  | 0.53           | 0                     | 1.56 (1.34-1.82) | 8.06E-16      |   |
| rs35000415       | 128585616 | C/T      | 0.17 | 0.12    | O/O         | 1.65 (1.33-2.06)                  | 7.35E-06  | 1.53 (1.35-1.74) | 2.21E-11  | 0.56           | 0                     | 1.57 (1.34-1.82) | 8.22E-16      |   |
| rs117473643      | 128698186 | G/C      | 0.17 | 0.12    | I/I         | 1.64 (1.31-2.04)                  | 1.15E-05  | 1.53 (1.35-1.74) | 1.88E-11  | 0.60           | 0                     | 1.56 (1.34-1.82) | 1.06E-15      |   |
| rs117944677      | 128698185 | A/T      | 0.17 | 0.12    | I/I         | 1.64 (1.31-2.04)                  | 1.15E-05  | 1.53 (1.35-1.74) | 1.88E-11  | 0.60           | 0                     | 1.56 (1.34-1.82) | 1.06E-15      |   |
| rs36073657       | 128651522 | C/T      | 0.17 | 0.12    | I/I         | 1.64 (1.32-2.05)                  | 9.62E-06  | 1.53 (1.35-1.73) | 2.21E-11  | 0.58           | 0                     | 1.56 (1.34-1.82) | 1.06E-15      |   |
| rs13246321       | 128701331 | T/C      | 0.17 | 0.12    | O/I         | 1.63 (1.31-2.03)                  | 1.41E-05  | 1.53 (1.35-1.74) | 1.80E-11  | 0.63           | 0                     | 1.56 (1.34-1.82) | 1.23E-15      |   |
| rs34748780       | 128700153 | A/G      | 0.17 | 0.12    | I/I         | 1.63 (1.31-2.03)                  | 1.40E-05  | 1.53 (1.35-1.74) | 1.88E-11  | 0.63           | 0                     | 1.56 (1.34-1.81) | 1.27E-15      |   |
| rs13238352       | 128647942 | C/T      | 0.17 | 0.12    | I/I         | 1.64 (1.32-2.05)                  | 9.62E-06  | 1.53 (1.35-1.73) | 2.79E-11  | 0.57           | 0                     | 1.56 (1.34-1.82) | 1.33E-15      |   |
| rs4731532        | 128572766 | A/G      | 0.43 | 0.51    | O/O         | 0.78 (0.66-0.92)                  | 3.58E-03  | 0.70 (0.64-0.77) | 2.99E-14  | 0.25           | 25                    | 0.72 (0.64-0.81) | 1.41E-15      |   |
| rs13227075       | 128643297 | T/C      | 0.17 | 0.12    | I/I         | 1.64 (1.32-2.05)                  | 9.51E-06  | 1.53 (1.35-1.73) | 3.00E-11  | 0.56           | 0                     | 1.56 (1.34-1.81) | 1.42E-15      |   |
| rs13239597       | 128695983 | C/A      | 0.17 | 0.12    | I/I         | 1.64 (1.31-2.04)                  | 1.13E-05  | 1.52 (1.34-1.72) | 5.75E-11  | 0.56           | 0                     | 1.55 (1.33-1.81) | 3.23E-15      |   |
| chr7:128588434:I | 128588434 | T/TG     | 0.18 | 0.12    | I/I         | 1.63 (1.31-2.03)                  | 1.05E-05  | 1.50 (1.32-1.69) | 1.76E-10  | 0.49           | 0                     | 1.53 (1.32-1.78) | 9.40E-15      |   |
| rs34420397       | 128710302 | C/A      | 0.18 | 0.12    | I/I         | 1.66 (1.33-2.07)                  | 7.15E-06  | 1.49 (1.31-1.68) | 3.81E-10  | 0.40           | 0                     | 1.53 (1.32-1.78) | 1.47E-14      |   |
| rs17340351       | 128708797 | T/A      | 0.18 | 0.12    | I/I         | 1.62 (1.30-2.02)                  | 1.59E-05  | 1.50 (1.32-1.69) | 1.90E-10  | 0.52           | 0                     | 1.53 (1.32-1.78) | 1.48E-14      |   |
| rs17424921       | 128708122 | G/C      | 0.18 | 0.12    | I/I         | 1.62 (1.30-2.02)                  | 1.59E-05  | 1.49 (1.32-1.69) | 2.44E-10  | 0.51           | 0                     | 1.53 (1.31-1.78) | 1.91E-14      |   |
| rs13242075       | 128708939 | G/A      | 0.18 | 0.12    | I/I         | 1.62 (1.30-2.02)                  | 1.59E-05  | 1.49 (1.32-1.69) | 2.54E-10  | 0.51           | 0                     | 1.53 (1.31-1.78) | 1.99E-14      |   |
| chr7:128709884:I | 128709884 | C/CCCCA  | 0.18 | 0.12    | I/I         | 1.64 (1.31-2.04)                  | 1.10E-05  | 1.48 (1.31-1.68) | 4.10E-10  | 0.44           | 0                     | 1.53 (1.31-1.77) | 2.32E-14      |   |
| rs2004640        | 128578301 | T/G      | 0.41 | 0.48    | I/I         | 0.80 (0.67-0.94)                  | 7.96E-03  | 0.70 (0.64-0.77) | 2.62E-13  | 0.21           | 36                    | 0.73 (0.65-0.82) | 2.88E-14      |   |
| rs11761199       | 128581835 | A/G      | 0.53 | 0.46    | O/O         | 1.21 (1.02-1.42)                  | 2.46E-02  | 1.40 (1.27-1.53) | 8.96E-13  | 0.13           | 57                    | 1.34 (1.20-1.50) | 4.29E-13      |   |
| rs80086012       | 128711874 | C/T      | 0.16 | 0.11    | I/I         | 1.61 (1.28-2.02)                  | 4.68E-05  | 1.43 (1.25-1.63) | 1.08E-07  | 0.37           | 0                     | 1.48 (1.26-1.73) | 2.66E-11      |   |
| rs35354193       | 128727794 | G/A      | 0.18 | 0.13    | I/I         | 1.41 (1.13-1.75)                  | 2.49E-03  | 1.45 (1.28-1.64) | 6.89E-09  | 0.83           | 0                     | 1.43 (1.23-1.67) | 7.31E-11      |   |
| rs12536672       | 128717523 | C/A      | 0.19 | 0.14    | I/I         | 1.41 (1.14-1.74)                  | 1.70E-03  | 1.42 (1.26-1.60) | 1.20E-08  | 0.94           | 0                     | 1.42 (1.22-1.64) | 8.22E-11      |   |
| rs59110799       | 128716007 | G/T      | 0.19 | 0.14    | O/O         | 1.41 (1.14-1.75)                  | 1.60E-03  | 1.42 (1.26-1.60) | 1.44E-08  | 0.97           | 0                     | 1.42 (1.22-1.64) | 9.25E-11      |   |
| rs71581969       | 128722237 | C/A      | 0.19 | 0.14    | I/I         | 1.40 (1.13-1.73)                  | 2.34E-03  | 1.42 (1.26-1.60) | 1.20E-08  | 0.90           | 0                     | 1.41 (1.22-1.64) | 1.15E-10      |   |
| chr7:128717234:D | 128717234 | AAT/A    | 0.19 | 0.14    | I/I         | 1.41 (1.14-1.75)                  | 1.58E-03  | 1.41 (1.25-1.59) | 2.60E-08  | 0.99           | 0                     | 1.41 (1.22-1.63) | 1.61E-10      |   |
| rs34865778       | 128717305 | G/A      | 0.19 | 0.14    | I/I         | 1.41 (1.14-1.75)                  | 1.58E-03  | 1.41 (1.25-1.59) | 2.60E-08  | 0.99           | 0                     | 1.41 (1.22-1.63) | 1.61E-10      |   |
| rs12536719       | 128717740 | C/T      | 0.19 | 0.14    | I/I         | 1.41 (1.14-1.75)                  | 1.58E-03  | 1.41 (1.25-1.59) | 2.84E-08  | 0.98           | 0                     | 1.41 (1.22-1.63) | 1.75E-10      |   |
| rs17340542       | 128720045 | T/C      | 0.19 | 0.14    | O/O         | 1.39 (1.12-1.72)                  | 2.67E-03  | 1.42 (1.25-1.60) | 1.64E-08  | 0.89           | 0                     | 1.41 (1.21-1.63) | 1.79E-10      |   |
| rs66540114       | 128720295 | G/A      | 0.19 | 0.14    | I/I         | 1.39 (1.12-1.73)                  | 2.49E-03  | 1.41 (1.25-1.59) | 2.06E-08  | 0.91           | 0                     | 1.41 (1.21-1.63) | 2.06E-10      |   |
| rs13237546       | 128720433 | G/A      | 0.19 | 0.14    | I/I         | 1.40 (1.12-1.73)                  | 2.43E-03  | 1.41 (1.25-1.59) | 2.48E-08  | 0.94           | 0                     | 1.41 (1.21-1.63) | 2.40E-10      |   |
| rs34350562       | 128718708 | A/G      | 0.19 | 0.14    | I/I         | 1.39 (1.12-1.72)                  | 2.82E-03  | 1.41 (1.25-1.59) | 2.33E-08  | 0.91           | 0                     | 1.40 (1.21-1.63) | 2.64E-10      |   |
| rs13232316       | 128715299 | T/A      | 0.19 | 0.14    | I/I         | 1.41 (1.14-1.75)                  | 1.58E-03  | 1.40 (1.24-1.58) | 4.37E-08  | 0.95           | 0                     | 1.40 (1.21-1.63) | 2.66E-10      |   |
| rs35429892       | 128713630 | G/A      | 0.18 | 0.14    | I/I         | 1.42 (1.15-1.76)                  | 1.28E-03  | 1.40 (1.24-1.58) | 5.47E-08  | 0.90           | 0                     | 1.41 (1.21-1.63) | 2.69E-10      |   |
| rs35414340       | 128723194 | C/T      | 0.19 | 0.14    | I/I         | 1.41 (1.14-1.75)                  | 1.83E-03  | 1.40 (1.24-1.58) | 3.82E-08  | 0.98           | 0                     | 1.40 (1.21-1.63) | 2.72E-10      |   |
| rs13241591       | 128714746 | A/G      | 0.19 | 0.14    | I/I         | 1.41 (1.14-1.75)                  | 1.49E-03  | 1.40 (1.24-1.58) | 5.41E-08  | 0.93           | 0                     | 1.40 (1.21-1.63) | 3.09E-10      |   |
| rs13229034       | 128714843 | T/C      | 0.19 | 0.14    | I/I         | 1.42 (1.15-1.76)                  | 1.35E-03  | 1.40 (1.24-1.58) | 6.18E-08  | 0.91           | 0                     | 1.40 (1.21-1.63) | 3.21E-10      |   |
| rs34644138       | 128720967 | A/G      | 0.19 | 0.14    | O/I         | 1.39 (1.12-1.73)                  | 2.46E-03  | 1.40 (1.24-1.58) | 3.63E-08  | 0.95           | 0                     | 1.40 (1.21-1.62) | 3.49E-10      |   |
| rs71581967       | 128717169 | G/A      | 0.19 | 0.15    | I/I         | 1.35 (1.10-1.67)                  | 4.89E-03  | 1.36 (1.21-1.54) | 3.25E-07  | 0.95           | 0                     | 1.36 (1.18-1.57) | 5.80E-09      |   |
| rs113945951      | 128718178 | T/C      | 0.19 | 0.15    | I/I         | 1.35 (1.09-1.66)                  | 5.40E-03  | 1.36 (1.21-1.54) | 3.39E-07  | 0.93           | 0                     | 1.36 (1.18-1.57) | 6.67E-09      |   |
| rs13240595       | 128731777 | C/A      | 0.19 | 0.14    | O/O         | 1.37 (1.10-1.69)                  | 4.06E-03  | 1.35 (1.20-1.52) | 7.99E-07  | 0.93           | 0                     | 1.36 (1.17-1.57) | 1.14E-08      |   |
| rs17425212       | 128721724 | C/T      | 0.19 | 0.15    | O/O         | 1.32 (1.07-1.64)                  | 9.52E-03  | 1.36 (1.21-1.54) | 3.49E-07  | 0.82           | 0                     | 1.35 (1.17-1.56) | 1.24E-08      |   |
| rs7801838        | 128573994 | C/T      | 0.25 | 0.30    | I/I         | 0.88 (0.73-1.06)                  | 1.69E-01  | 0.73 (0.66-0.82) | 1.11E-08  | 0.10           | 63                    | 0.77 (0.68-0.88) | 2.55E-08      |   |
| rs4731530        | 128562578 | C/T      | 0.42 | 0.47    | O/O         | 0.79 (0.67-0.93)                  | 4.02E-03  | 0.80 (0.73-0.88) | 2.65E-06  | 0.86           | 0                     | 0.80 (0.71-0.89) | 3.66E-08      |   |
| rs12706860       | 128570026 | C/G      | 0.28 | 0.34    | I/I         | 0.91 (0.76-1.09)                  | 2.95E-01  | 0.74 (0.67-0.82) | 6.43E-09  | 0.05           | 74                    | 0.78 (0.69-0.89) | 4.41E-08      |   |
| rs3757385        | 128577304 | G/T      | 0.31 | 0.36    | O/O         | 0.86 (0.73-1.03)                  | 1.01E-01  | 0.76 (0.69-0.84) | 7.64E-08  | 0.23           | 31                    | 0.79 (0.70-0.89) | 5.82E-08      |   |
|                  |           |          |      |         |             |                                   |           |                  |           |                |                       |                  |               |   |

Supplementary Table 7. Association analysis in *IRF5*

| SNP              | BP        | Alleles  |      | MAF     |             | Observed or Imputed in Dataset1/2 | Dataset 1 |                  | Dataset 2 |       | Test of heterogeneity |                  | Meta analysis |  |
|------------------|-----------|----------|------|---------|-------------|-----------------------------------|-----------|------------------|-----------|-------|-----------------------|------------------|---------------|--|
|                  |           | maj/ min | Case | Control | OR (95% CI) |                                   | P         | OR (95% CI)      | P         | $P_Q$ | $I^2$                 | OR (95% CI)      | P             |  |
| rs34288126       | 128735438 | G/A      | 0.17 | 0.13    | O/O         | 1.32 (1.06-1.64)                  | 1.30E-02  | 1.35 (1.19-1.53) | 2.15E-06  | 0.86  | 0                     | 1.34 (1.15-1.56) | 9.57E-08      |  |
| rs3757388        | 128576023 | A/G      | 0.31 | 0.37    | I/I         | 0.86 (0.72-1.02)                  | 7.88E-02  | 0.77 (0.70-0.85) | 2.19E-07  | 0.32  | 0                     | 0.80 (0.71-0.90) | 1.02E-07      |  |
| rs754284         | 128571478 | C/G      | 0.27 | 0.32    | I/I         | 0.89 (0.74-1.07)                  | 2.24E-01  | 0.75 (0.68-0.83) | 3.68E-08  | 0.10  | 63                    | 0.79 (0.70-0.89) | 1.09E-07      |  |
| rs35939202       | 128572040 | G/A      | 0.27 | 0.32    | O/O         | 0.89 (0.75-1.07)                  | 2.24E-01  | 0.75 (0.67-0.83) | 3.80E-08  | 0.10  | 64                    | 0.79 (0.69-0.89) | 1.14E-07      |  |
| chr7:128570575:1 | 128570575 | G/GA     | 0.27 | 0.32    | I/I         | 0.91 (0.76-1.09)                  | 2.89E-01  | 0.75 (0.67-0.83) | 2.56E-08  | 0.07  | 70                    | 0.79 (0.69-0.89) | 1.29E-07      |  |
| rs3807135        | 128577617 | C/T      | 0.31 | 0.37    | O/I         | 0.86 (0.72-1.02)                  | 7.94E-02  | 0.77 (0.70-0.85) | 2.89E-07  | 0.33  | 0                     | 0.80 (0.71-0.90) | 1.31E-07      |  |
| rs11982901       | 128566754 | C/T      | 0.27 | 0.32    | I/I         | 0.91 (0.76-1.09)                  | 3.17E-01  | 0.74 (0.67-0.83) | 2.26E-08  | 0.06  | 73                    | 0.79 (0.70-0.89) | 1.41E-07      |  |
| rs66720828       | 128567535 | G/C      | 0.27 | 0.32    | I/I         | 0.91 (0.76-1.09)                  | 3.08E-01  | 0.75 (0.68-0.83) | 3.16E-08  | 0.06  | 71                    | 0.79 (0.70-0.90) | 1.74E-07      |  |
| rs13245639       | 128567810 | C/T      | 0.27 | 0.32    | I/I         | 0.91 (0.76-1.09)                  | 3.09E-01  | 0.75 (0.68-0.83) | 4.12E-08  | 0.07  | 70                    | 0.79 (0.70-0.90) | 2.15E-07      |  |
| rs7783384        | 128681297 | C/T      | 0.33 | 0.38    | I/I         | 0.82 (0.70-0.98)                  | 2.56E-02  | 0.79 (0.72-0.87) | 2.90E-06  | 0.71  | 0                     | 0.80 (0.71-0.90) | 2.62E-07      |  |
| rs729302         | 128568960 | A/C      | 0.27 | 0.32    | O/O         | 0.91 (0.76-1.09)                  | 3.31E-01  | 0.75 (0.68-0.83) | 4.97E-08  | 0.06  | 71                    | 0.80 (0.70-0.90) | 2.83E-07      |  |
| rs73238196       | 128567968 | G/C      | 0.27 | 0.32    | I/I         | 0.91 (0.76-1.09)                  | 3.08E-01  | 0.76 (0.68-0.84) | 8.00E-08  | 0.08  | 68                    | 0.80 (0.70-0.90) | 3.62E-07      |  |
| rs4731541        | 128678236 | G/C      | 0.32 | 0.37    | I/I         | 0.82 (0.69-0.97)                  | 2.37E-02  | 0.80 (0.73-0.88) | 6.78E-06  | 0.80  | 0                     | 0.81 (0.72-0.91) | 5.31E-07      |  |
| rs34891352       | 128567718 | C/T      | 0.28 | 0.33    | I/I         | 0.93 (0.77-1.11)                  | 4.08E-01  | 0.75 (0.68-0.84) | 1.01E-07  | 0.06  | 73                    | 0.80 (0.71-0.91) | 7.61E-07      |  |
| rs35611012       | 128564825 | C/T      | 0.26 | 0.31    | I/I         | 0.91 (0.76-1.09)                  | 3.27E-01  | 0.76 (0.68-0.84) | 2.14E-07  | 0.08  | 67                    | 0.80 (0.71-0.91) | 9.05E-07      |  |
| chr7:128665751:1 | 128665751 | GC/G     | 0.33 | 0.38    | I/I         | 0.84 (0.71-1.00)                  | 5.24E-02  | 0.80 (0.72-0.88) | 5.73E-06  | 0.58  | 0                     | 0.81 (0.72-0.91) | 1.10E-06      |  |
| rs4731536        | 128640293 | T/C      | 0.34 | 0.39    | O/O         | 0.83 (0.70-0.98)                  | 3.01E-02  | 0.81 (0.73-0.89) | 1.18E-05  | 0.80  | 0                     | 0.81 (0.72-0.91) | 1.16E-06      |  |
| chr7:128665753:1 | 128665753 | CA/C     | 0.33 | 0.38    | I/I         | 0.83 (0.70-0.98)                  | 2.86E-02  | 0.81 (0.73-0.89) | 1.28E-05  | 0.82  | 0                     | 0.81 (0.72-0.91) | 1.18E-06      |  |
| rs12155080       | 128658739 | C/G      | 0.33 | 0.38    | I/I         | 0.82 (0.69-0.97)                  | 2.42E-02  | 0.81 (0.74-0.89) | 1.68E-05  | 0.89  | 0                     | 0.81 (0.72-0.91) | 1.28E-06      |  |
| rs11767711       | 128651832 | T/C      | 0.34 | 0.39    | O/O         | 0.83 (0.70-0.98)                  | 3.00E-02  | 0.81 (0.74-0.89) | 1.56E-05  | 0.82  | 0                     | 0.82 (0.73-0.92) | 1.49E-06      |  |
| rs11763684       | 128637994 | C/T      | 0.34 | 0.39    | I/I         | 0.84 (0.71-0.99)                  | 3.78E-02  | 0.81 (0.73-0.89) | 1.31E-05  | 0.73  | 0                     | 0.82 (0.73-0.92) | 1.62E-06      |  |
| rs2272347        | 128619415 | A/T      | 0.33 | 0.38    | I/I         | 0.83 (0.70-0.98)                  | 2.88E-02  | 0.81 (0.74-0.89) | 1.91E-05  | 0.85  | 0                     | 0.82 (0.73-0.92) | 1.72E-06      |  |
| rs7796963        | 128629001 | C/T      | 0.33 | 0.38    | I/I         | 0.83 (0.70-0.98)                  | 2.99E-02  | 0.81 (0.74-0.90) | 2.30E-05  | 0.86  | 0                     | 0.82 (0.73-0.92) | 2.13E-06      |  |
| rs13242262       | 128591364 | T/A      | 0.34 | 0.38    | I/I         | 0.83 (0.70-0.98)                  | 3.04E-02  | 0.81 (0.74-0.89) | 2.30E-05  | 0.85  | 0                     | 0.82 (0.73-0.92) | 2.17E-06      |  |
| rs10954213       | 128589427 | A/G      | 0.34 | 0.38    | O/O         | 0.83 (0.70-0.98)                  | 2.91E-02  | 0.82 (0.74-0.90) | 3.63E-05  | 0.90  | 0                     | 0.82 (0.73-0.92) | 3.20E-06      |  |
| rs6965542        | 128655918 | T/C      | 0.34 | 0.39    | I/I         | 0.83 (0.70-0.98)                  | 2.81E-02  | 0.82 (0.75-0.90) | 3.83E-05  | 0.94  | 0                     | 0.82 (0.73-0.92) | 3.24E-06      |  |
| rs78366570       | 128738502 | A/G      | 0.14 | 0.11    | I/I         | 1.27 (1.00-1.62)                  | 5.16E-02  | 1.33 (1.17-1.52) | 2.32E-05  | 0.73  | 0                     | 1.31 (1.12-1.55) | 3.85E-06      |  |
| rs17339773       | 128677052 | T/A      | 0.04 | 0.02    | I/I         | 1.75 (1.08-2.83)                  | 2.27E-02  | 1.70 (1.31-2.20) | 6.21E-05  | 0.92  | 0                     | 1.71 (1.24-2.36) | 4.16E-06      |  |
| rs113253472      | 128738923 | A/C      | 0.14 | 0.11    | I/I         | 1.27 (1.00-1.62)                  | 5.16E-02  | 1.33 (1.16-1.51) | 3.46E-05  | 0.76  | 0                     | 1.31 (1.11-1.54) | 5.56E-06      |  |
| rs35598937       | 128713658 | G/C      | 0.25 | 0.21    | I/I         | 1.36 (1.13-1.64)                  | 1.17E-03  | 1.19 (1.07-1.33) | 1.16E-03  | 0.23  | 32                    | 1.24 (1.09-1.41) | 7.54E-06      |  |
| rs6968508        | 128563778 | G/G      | 0.11 | 0.14    | I/I         | 0.73 (0.56-0.94)                  | 1.54E-02  | 0.77 (0.66-0.88) | 2.60E-04  | 0.74  | 0                     | 0.76 (0.63-0.90) | 1.18E-05      |  |
| rs11976775       | 128691990 | C/A      | 0.19 | 0.22    | O/I         | 0.77 (0.62-0.94)                  | 1.27E-02  | 0.81 (0.72-0.91) | 3.52E-04  | 0.66  | 0                     | 0.80 (0.69-0.92) | 1.35E-05      |  |
| rs6961014        | 128692710 | G/C      | 0.19 | 0.22    | I/I         | 0.78 (0.64-0.96)                  | 1.79E-02  | 0.81 (0.72-0.91) | 3.18E-04  | 0.79  | 0                     | 0.80 (0.70-0.92) | 1.65E-05      |  |
| rs12540468       | 128722800 | G/A      | 0.26 | 0.22    | I/I         | 1.29 (1.07-1.55)                  | 6.68E-03  | 1.20 (1.08-1.33) | 7.36E-04  | 0.49  | 0                     | 1.22 (1.08-1.39) | 1.70E-05      |  |
| rs34990543       | 128564879 | C/T      | 0.11 | 0.14    | I/I         | 0.74 (0.57-0.95)                  | 1.84E-02  | 0.77 (0.67-0.89) | 3.36E-04  | 0.77  | 0                     | 0.76 (0.64-0.90) | 1.79E-05      |  |
| rs17581970       | 128723327 | G/A      | 0.26 | 0.22    | I/I         | 1.29 (1.07-1.55)                  | 7.17E-03  | 1.20 (1.08-1.33) | 8.49E-04  | 0.49  | 0                     | 1.22 (1.08-1.39) | 2.09E-05      |  |
| rs6968225        | 128563607 | C/G      | 0.11 | 0.14    | I/I         | 0.75 (0.58-0.96)                  | 2.52E-02  | 0.77 (0.67-0.89) | 2.97E-04  | 0.86  | 0                     | 0.76 (0.64-0.91) | 2.10E-05      |  |
| rs13222807       | 128735744 | T/C      | 0.19 | 0.16    | O/O         | 1.23 (1.00-1.51)                  | 5.13E-02  | 1.26 (1.12-1.41) | 1.48E-04  | 0.86  | 0                     | 1.25 (1.08-1.44) | 2.14E-05      |  |
| rs6976410        | 128718027 | G/C      | 0.25 | 0.22    | I/I         | 1.34 (1.11-1.61)                  | 2.18E-03  | 1.18 (1.06-1.31) | 2.00E-03  | 0.26  | 22                    | 1.22 (1.08-1.39) | 2.16E-05      |  |
| rs3757386        | 128577297 | C/T      | 0.09 | 0.12    | O/I         | 0.83 (0.64-1.07)                  | 1.56E-01  | 0.72 (0.62-0.84) | 3.91E-05  | 0.38  | 0                     | 0.75 (0.62-0.90) | 2.26E-05      |  |
| rs1476193        | 128702410 | A/C      | 0.20 | 0.23    | I/I         | 0.80 (0.65-0.97)                  | 2.60E-02  | 0.81 (0.72-0.91) | 3.13E-04  | 0.88  | 0                     | 0.81 (0.70-0.93) | 2.27E-05      |  |
| rs6960994        | 128692657 | T/C      | 0.20 | 0.23    | O/O         | 0.77 (0.63-0.95)                  | 1.33E-02  | 0.82 (0.73-0.92) | 5.68E-04  | 0.64  | 0                     | 0.81 (0.70-0.93) | 2.29E-05      |  |
| chr7:128608939:D | 128608939 | G/GA     | 0.30 | 0.34    | I/I         | 0.83 (0.69-0.99)                  | 3.42E-02  | 0.83 (0.75-0.92) | 2.61E-04  | 0.95  | 0                     | 0.83 (0.73-0.94) | 2.47E-05      |  |
| rs13225818       | 128736014 | T/C      | 0.19 | 0.16    | O/O         | 1.22 (0.99-1.50)                  | 5.84E-02  | 1.25 (1.12-1.41) | 1.54E-04  | 0.83  | 0                     | 1.24 (1.08-1.43) | 2.54E-05      |  |
| chr7:128577319:D | 128577319 | GGT/G    | 0.09 | 0.12    | I/I         | 0.82 (0.63-1.07)                  | 1.49E-01  | 0.73 (0.62-0.85) | 5.03E-05  | 0.41  | 0                     | 0.75 (0.62-0.91) | 2.66E-05      |  |
| rs10279821       | 128683547 | C/T      | 0.29 | 0.33    | I/I         | 0.85 (0.71-1.01)                  | 6.23E-02  | 0.83 (0.75-0.91) | 1.55E-04  | 0.82  | 0                     | 0.83 (0.74-0.94) | 2.72E-05      |  |
| rs3807134        | 128577338 | T/C      | 0.09 | 0.12    | O/O         | 0.82 (0.63-1.07)                  | 1.49E-01  | 0.73 (0.62-0.85) | 5.55E-05  | 0.41  | 0                     | 0.75 (0.63-0.91) | 2.90E-05      |  |
| rs17340646       | 128722514 | T/G      | 0.26 | 0.22    | O/O         | 1.29 (1.07-1.55)                  | 7.86E-03  | 1.19 (1.07-1.33) | 1.10E-03  | 0.49  | 0                     | 1.22 (1.07-1.39) | 2.96E-05      |  |
| rs2242028        | 128694976 | T/C      | 0.19 | 0.22    | I/I         | 0.79 (0.65-0.97)                  | 2.25E-02  | 0.82 (0.73-0.91) | 5.08E-04  | 0.79  | 0                     | 0.81 (0.70-0.93) | 3.22E-05      |  |
| rs62478580       | 128599933 | G/T      | 0.30 | 0.34    | I/I         | 0.85 (0.71-1.01)                  | 6.40E-02  | 0.83 (0.75-0.91) | 1.91E-04  | 0.84  | 0                     | 0.83 (0.74-0.94) | 3.41E-05      |  |
| rs13221560       | 128663175 | G/A      | 0.30 | 0.34    | I/I         | 0.85 (0.71-1.01)                  | 6.92E-02  | 0.83 (0.75-0.91) | 1.87E-04  | 0.81  | 0                     | 0.83 (0.74-0.94) | 3.63E-05      |  |
| rs6467224        | 128688456 | C/T      | 0.29 | 0.33    | I/I         | 0.87 (0.73-1.03)                  | 1.13E-01  | 0.82 (0.74-0.91) | 1.07E-04  | 0.59  | 0                     | 0.83 (0.74-0.94) | 3.72E-05      |  |
| rs6973975        | 128675549 | A/G      | 0.30 | 0.34    | I/I         | 0.85 (0.71-1.01)                  | 6.99E-02  | 0.83 (0.75-0.92) | 1.97E-04  | 0.81  | 0                     | 0.84 (0.74-0.94) | 3.85E-05      |  |
| rs921403         | 128676724 | A/T      | 0.30 | 0.34    | I/I         | 0.86 (0.72-1.02)                  | 8.29E-02  | 0.83 (0.75-0.91) | 1.64E-04  | 0.74  | 0                     | 0.84 (0.74-0.94) | 3.89E-05      |  |
| rs3778749        | 128617811 | C/T      | 0.30 | 0.34    | I/I         | 0.83 (0.69-0.99)                  | 3.97E-02  | 0.84 (0.76-0.92) | 4.07E-04  | 0.93  | 0                     | 0.83 (0.74-0.94) | 4.35E-05      |  |
| rs1874327        | 128585376 | T/A      | 0.29 | 0.33    | I/I         | 0.84 (0.70-1.00)                  | 4.73E-02  | 0.84 (0.76-0.93) | 4.87E-04  | 0.97  | 0                     | 0.84 (0.74-0.95) | 6.11E-05      |  |
| rs56088330       | 128737958 | T/A      | 0.50 | 0.46    | I/I         | 1.03 (0.87-1.21)                  | 7.47E-01  | 1.24 (1.13-1.36) | 6.37E-06  | 0.06  | 72                    | 1.17 (1.05-1.31) | 6.48E-05      |  |
| rs3857852        | 128657277 | C/T      | 0.30 | 0.34    | I/I         | 0.84 (0.71-1.01)                  | 5.96E-02  | 0.84 (0.76-0.93) | 4.92E-04  | 0.96  | 0                     | 0.84 (0.74-0.95) | 7.72E-05      |  |
| rs11760442       | 128656120 | C/A      | 0.30 | 0.34    | I/I         | 0.84 (0.71-1.01)                  | 5.94E-02  | 0.84 (0.76-0.93) | 5.23E-04  | 0.97  | 0                     | 0.84 (0.75-0.95) | 8.15E-05      |  |
| rs10954214       | 128589633 | T/C      | 0.30 | 0.34    | O/O         | 0.82 (0.69-0.98)                  | 3.29E-02  | 0.85 (0.77-0.93) | 9.27E-04  | 0.79  | 0                     | 0.84 (0.74-0.95) | 8.17E-05      |  |
| rs12532542       | 128667412 | C/T      | 0.30 | 0.34    | I/I         | 0.85 (0.71-1.01)                  | 6.40E-02  | 0.84 (0.76-0.93) | 5.03E-04  | 0.94  | 0                     | 0.84 (0.75-0.95) | 8.44E-05      |  |
| rs7800687        | 128593719 | G/C      | 0.30 | 0.34    | I/I         | 0.84 (0.71-1.01)                  | 6.01E-02  | 0.84 (0.76-0.93) | 6.00E-04  | 0.97  | 0                     | 0.84 (0.75-0.95) | 9.39E-05      |  |
| rs6467223        | 128674666 | G/A      | 0.30 | 0.34    | O/O         | 0.86 (0.72-1.03)                  | 1.00E-01  | 0.83 (0.76-0.92) | 3.62E-04  | 0.75  | 0                     | 0.84 (0.75-0.95) | 9.86E-05      |  |
| rs3925323        | 128592241 | G/A      | 0.30 | 0.34    | I/I         | 0.85 (0.71-1.01)                  | 7.21E-02  | 0.84 (0.76-0.93) | 5.57E-04  | 0.91  | 0                     | 0.84 (0.75-0.95) | 1.05E-04      |  |
| rs12537496       | 128712868 | G/A      | 0.26 | 0.23    | I/I         | 1.32 (1.09-1.58)                  | 3.40E-03  | 1.16 (1.04-1.29) | 6.39E-03  | 0.24  | 28                    | 1.20 (1.06-1.37) | 1.09E-04      |  |
| rs2402941        | 128563014 | G/A      | 0.12 | 0.14    | O/O         | 0.73 (0.57-0.94)                  | 1.35E-02  | 0.81 (0.71-0.93) | 2.61E-03  | 0.49  | 0                     | 0.79 (0.67-0.93) | 1.12E-04      |  |
| rs11767954       | 128699679 | T/A      | 0.19 | 0.23    | I/I         | 0.79 (0.64-0.97)                  | 2.20E-02  | 0.83 (0.74-0.94) | 1.83E-03  | 0.64  | 0                     | 0.82 (0.72-0.94) | 1.15E-04      |  |
| rs6948928        | 128623097 | C/T      | 0.30 | 0.34    | I/I         | 0.85 (0.71-1.01)                  | 6.32E-02  | 0.84 (0.76-0.93) | 7.21E-04  | 0.98  | 0                     | 0.84 (0.75-0.95) | 1.17E-04      |  |
| rs1072767        | 128673205 | A/G      | 0.30 | 0.34    | O/O         | 0.85 (0.71-1.01)                  | 7.34E-02  | 0.84 (0.76-0.93) | 6.67E-04  | 0.93  | 0                     | 0.85 (0.75-0.95) | 1.26E-04      |  |
| rs35994853       | 128738262 | C/T      | 0.50 | 0.46    |             |                                   |           |                  |           |       |                       |                  |               |  |

Supplementary Table 7. Association analysis in *IRF5*

| SNP              | BP        | Alleles   |      | MAF     |             | Observed or Imputed in Dataset1/2 | Dataset 1 |                  | Dataset 2 |                | Test of heterogeneity |                  | Meta analysis |  |
|------------------|-----------|-----------|------|---------|-------------|-----------------------------------|-----------|------------------|-----------|----------------|-----------------------|------------------|---------------|--|
|                  |           | maj / min | Case | Control | OR (95% CI) |                                   | P         | OR (95% CI)      | P         | P <sub>Q</sub> | I <sup>2</sup>        | OR (95% CI)      | P             |  |
|                  |           |           |      |         |             |                                   |           |                  |           |                |                       |                  |               |  |
| rs3778750        | 128617089 | T/G       | 0.30 | 0.34    | I/I         | 0.85 (0.71-1.01)                  | 6.33E-02  | 0.85 (0.77-0.93) | 8.49E-04  | 1.00           | 0                     | 0.85 (0.75-0.95) | 1.37E-04      |  |
| rs3847099        | 128656831 | T/C       | 0.30 | 0.34    | O/O         | 0.85 (0.72-1.02)                  | 7.87E-02  | 0.84 (0.77-0.93) | 7.40E-04  | 0.92           | 0                     | 0.85 (0.75-0.96) | 1.49E-04      |  |
| rs2280714        | 128594725 | T/C       | 0.30 | 0.34    | O/O         | 0.84 (0.71-1.01)                  | 6.15E-02  | 0.85 (0.77-0.94) | 9.68E-04  | 0.98           | 0                     | 0.85 (0.75-0.96) | 1.51E-04      |  |
| rs13227095       | 128723943 | T/C       | 0.26 | 0.23    | O/O         | 1.25 (1.04-1.50)                  | 1.82E-02  | 1.17 (1.05-1.30) | 3.19E-03  | 0.56           | 0                     | 1.19 (1.05-1.35) | 1.74E-04      |  |
| rs7789423        | 128621204 | G/A       | 0.30 | 0.34    | O/O         | 0.85 (0.71-1.01)                  | 6.30E-02  | 0.85 (0.77-0.94) | 1.10E-03  | 0.97           | 0                     | 0.85 (0.75-0.96) | 1.76E-04      |  |
| rs13222837       | 128738964 | A/T       | 0.50 | 0.45    | I/I         | 1.01 (0.86-1.20)                  | 8.58E-01  | 1.22 (1.11-1.34) | 2.07E-05  | 0.06           | 73                    | 1.16 (1.04-1.30) | 2.16E-04      |  |
| rs7799991        | 128738941 | A/T       | 0.50 | 0.45    | I/I         | 1.01 (0.86-1.20)                  | 8.58E-01  | 1.22 (1.11-1.34) | 2.07E-05  | 0.06           | 73                    | 1.16 (1.04-1.30) | 2.16E-04      |  |
| chr7:128730939:1 | 128730939 | G/GTCCAC  | 0.33 | 0.30    | I/I         | 1.23 (1.03-1.46)                  | 2.13E-02  | 1.15 (1.05-1.27) | 3.82E-03  | 0.55           | 0                     | 1.17 (1.04-1.32) | 2.38E-04      |  |
| rs13226546       | 128739949 | C/A       | 0.51 | 0.47    | I/I         | 1.03 (0.87-1.22)                  | 7.40E-01  | 1.22 (1.11-1.34) | 3.86E-05  | 0.09           | 66                    | 1.16 (1.03-1.30) | 2.51E-04      |  |
| rs4473954        | 128728754 | A/T       | 0.33 | 0.29    | I/I         | 1.21 (1.01-1.44)                  | 3.32E-02  | 1.16 (1.05-1.27) | 3.41E-03  | 0.66           | 0                     | 1.17 (1.04-1.32) | 3.03E-04      |  |
| rs17581972       | 128723334 | T/C       | 0.26 | 0.23    | I/I         | 1.24 (1.03-1.49)                  | 2.27E-02  | 1.16 (1.05-1.29) | 4.72E-03  | 0.57           | 0                     | 1.18 (1.04-1.34) | 3.13E-04      |  |
| rs1874330        | 128575224 | T/C       | 0.16 | 0.19    | I/I         | 0.80 (0.64-1.00)                  | 4.97E-02  | 0.83 (0.73-0.94) | 2.54E-03  | 0.82           | 0                     | 0.82 (0.71-0.95) | 3.18E-04      |  |
| rs34673027       | 128739025 | C/A       | 0.49 | 0.45    | O/I         | 1.04 (0.88-1.22)                  | 6.75E-01  | 1.21 (1.10-1.32) | 7.26E-05  | 0.12           | 59                    | 1.15 (1.03-1.29) | 3.41E-04      |  |
| rs11768806       | 128573128 | C/T       | 0.14 | 0.17    | O/O         | 0.79 (0.63-0.99)                  | 3.91E-02  | 0.83 (0.73-0.94) | 3.65E-03  | 0.72           | 0                     | 0.81 (0.70-0.95) | 3.72E-04      |  |
| rs2402940        | 128570742 | C/T       | 0.14 | 0.17    | I/I         | 0.78 (0.62-0.98)                  | 3.05E-02  | 0.83 (0.73-0.94) | 4.53E-03  | 0.61           | 0                     | 0.82 (0.70-0.95) | 3.79E-04      |  |
| rs73238199       | 128575651 | C/T       | 0.07 | 0.09    | O/O         | 0.84 (0.62-1.14)                  | 2.69E-01  | 0.74 (0.62-0.88) | 6.51E-04  | 0.45           | 0                     | 0.77 (0.62-0.95) | 5.11E-04      |  |
| rs140339347      | 128566806 | T/A       | 0.01 | 0.02    | I/I         | 0.89 (0.48-1.65)                  | 7.10E-01  | 0.43 (0.28-0.66) | 1.11E-04  | 0.06           | 72                    | 0.53 (0.33-0.86) | 5.23E-04      |  |
| rs2242029        | 128695279 | G/A       | 0.15 | 0.18    | O/I         | 0.79 (0.63-0.98)                  | 3.41E-02  | 0.84 (0.74-0.95) | 5.68E-03  | 0.63           | 0                     | 0.82 (0.71-0.96) | 5.23E-04      |  |
| rs754281         | 128572180 | C/T       | 0.15 | 0.17    | O/O         | 0.76 (0.61-0.96)                  | 2.15E-02  | 0.84 (0.74-0.96) | 9.34E-03  | 0.45           | 0                     | 0.82 (0.70-0.96) | 6.19E-04      |  |
| rs7805352        | 128703350 | C/T       | 0.15 | 0.17    | I/I         | 0.78 (0.62-0.98)                  | 2.96E-02  | 0.84 (0.74-0.96) | 7.97E-03  | 0.55           | 0                     | 0.82 (0.70-0.96) | 6.65E-04      |  |
| rs12155244       | 128710988 | C/T       | 0.17 | 0.20    | I/I         | 0.83 (0.68-1.03)                  | 9.33E-02  | 0.83 (0.74-0.94) | 3.52E-03  | 1.00           | 0                     | 0.83 (0.72-0.97) | 7.68E-04      |  |
| rs4268073        | 128564932 | C/T       | 0.16 | 0.19    | O/I         | 0.98 (0.79-1.22)                  | 8.49E-01  | 0.79 (0.70-0.90) | 2.56E-04  | 0.10           | 64                    | 0.84 (0.72-0.98) | 1.36E-03      |  |
| rs28864742       | 128698257 | T/C       | 0.16 | 0.18    | I/I         | 0.80 (0.64-1.00)                  | 4.54E-02  | 0.86 (0.76-0.97) | 1.39E-02  | 0.59           | 0                     | 0.84 (0.72-0.98) | 1.64E-03      |  |
| rs73721684       | 128577014 | G/A       | 0.01 | 0.02    | O/I         | 0.59 (0.32-1.10)                  | 9.53E-02  | 0.60 (0.41-0.88) | 8.38E-03  | 0.96           | 0                     | 0.60 (0.38-0.93) | 1.81E-03      |  |
| rs6964194        | 128726026 | C/A       | 0.37 | 0.34    | I/I         | 1.17 (0.99-1.38)                  | 6.58E-02  | 1.12 (1.02-1.23) | 1.68E-02  | 0.67           | 0                     | 1.14 (1.01-1.27) | 2.67E-03      |  |
| rs6959965        | 128725722 | C/T       | 0.37 | 0.34    | I/I         | 1.17 (0.99-1.38)                  | 6.58E-02  | 1.12 (1.02-1.23) | 1.74E-02  | 0.66           | 0                     | 1.13 (1.01-1.27) | 2.77E-03      |  |
| rs6959557        | 128725550 | A/G       | 0.37 | 0.34    | O/I         | 1.17 (0.99-1.38)                  | 6.58E-02  | 1.12 (1.02-1.23) | 1.80E-02  | 0.66           | 0                     | 1.13 (1.01-1.27) | 2.87E-03      |  |
| rs12706862       | 128725325 | A/G       | 0.37 | 0.34    | O/O         | 1.17 (0.99-1.39)                  | 6.22E-02  | 1.12 (1.02-1.23) | 2.00E-02  | 0.63           | 0                     | 1.13 (1.01-1.27) | 3.06E-03      |  |
| rs6959820        | 128725689 | A/G       | 0.37 | 0.34    | O/I         | 1.17 (0.99-1.38)                  | 6.58E-02  | 1.12 (1.02-1.23) | 2.16E-02  | 0.64           | 0                     | 1.13 (1.01-1.27) | 3.46E-03      |  |
| rs77065770       | 128569099 | G/A       | 0.04 | 0.05    | I/I         | 0.81 (0.54-1.20)                  | 2.88E-01  | 0.72 (0.56-0.91) | 6.14E-03  | 0.61           | 0                     | 0.74 (0.56-0.98) | 3.90E-03      |  |
| rs73238193       | 128562446 | A/G       | 0.29 | 0.32    | O/O         | 0.95 (0.80-1.13)                  | 5.66E-01  | 0.86 (0.77-0.95) | 2.57E-03  | 0.31           | 2                     | 0.88 (0.78-1.00) | 4.25E-03      |  |
| rs76575414       | 128574466 | T/C       | 0.04 | 0.05    | I/I         | 0.82 (0.54-1.22)                  | 3.23E-01  | 0.71 (0.56-0.91) | 6.02E-03  | 0.58           | 0                     | 0.74 (0.56-0.99) | 4.34E-03      |  |
| rs74883380       | 128569930 | T/C       | 0.04 | 0.05    | I/I         | 0.81 (0.55-1.21)                  | 3.10E-01  | 0.72 (0.56-0.91) | 6.73E-03  | 0.60           | 0                     | 0.74 (0.56-0.99) | 4.57E-03      |  |
| rs111236877      | 128572399 | C/T       | 0.04 | 0.05    | I/I         | 0.82 (0.54-1.22)                  | 3.23E-01  | 0.72 (0.57-0.91) | 6.93E-03  | 0.60           | 0                     | 0.74 (0.56-0.99) | 4.91E-03      |  |
| rs56303857       | 128564235 | C/T       | 0.04 | 0.05    | O/O         | 0.76 (0.51-1.13)                  | 1.71E-01  | 0.75 (0.60-0.95) | 1.53E-02  | 0.96           | 0                     | 0.75 (0.57-0.99) | 5.39E-03      |  |
| rs4728150        | 128731795 | A/G       | 0.24 | 0.27    | O/O         | 0.98 (0.81-1.18)                  | 8.15E-01  | 0.84 (0.76-0.94) | 1.82E-03  | 0.18           | 44                    | 0.88 (0.77-1.00) | 5.67E-03      |  |
| rs11770889       | 128730083 | G/A       | 0.18 | 0.20    | I/I         | 0.94 (0.77-1.16)                  | 5.83E-01  | 0.84 (0.75-0.94) | 3.68E-03  | 0.33           | 0                     | 0.87 (0.75-1.00) | 5.91E-03      |  |
| rs7791525        | 128732013 | G/A       | 0.41 | 0.44    | O/O         | 0.90 (0.76-1.06)                  | 1.96E-01  | 0.89 (0.81-0.98) | 1.48E-02  | 0.95           | 0                     | 0.89 (0.80-1.00) | 5.92E-03      |  |
| rs142866741      | 128576573 | C/A       | 0.04 | 0.05    | I/I         | 0.82 (0.55-1.22)                  | 3.25E-01  | 0.73 (0.57-0.93) | 9.37E-03  | 0.63           | 0                     | 0.75 (0.57-1.00) | 6.45E-03      |  |
| rs6953165        | 128578210 | C/G       | 0.04 | 0.05    | I/I         | 0.82 (0.55-1.22)                  | 3.25E-01  | 0.73 (0.58-0.93) | 1.04E-02  | 0.65           | 0                     | 0.75 (0.57-1.00) | 7.07E-03      |  |
| rs74317073       | 128578483 | T/C       | 0.04 | 0.05    | I/I         | 0.82 (0.55-1.23)                  | 3.47E-01  | 0.73 (0.58-0.93) | 1.02E-02  | 0.62           | 0                     | 0.76 (0.57-1.01) | 7.49E-03      |  |
| rs75434450       | 128580426 | C/T       | 0.04 | 0.05    | I/I         | 0.82 (0.54-1.25)                  | 3.58E-01  | 0.73 (0.57-0.93) | 9.96E-03  | 0.62           | 0                     | 0.75 (0.56-1.01) | 7.56E-03      |  |
| rs6975315        | 128582485 | G/A       | 0.01 | 0.02    | I/I         | 0.60 (0.32-1.13)                  | 1.15E-01  | 0.67 (0.47-0.96) | 3.06E-02  | 0.77           | 0                     | 0.65 (0.42-1.01) | 7.60E-03      |  |
| rs55807509       | 128697857 | T/C       | 0.40 | 0.37    | I/I         | 1.11 (0.95-1.31)                  | 1.98E-01  | 1.12 (1.02-1.22) | 2.11E-02  | 0.98           | 0                     | 1.12 (1.00-1.25) | 8.35E-03      |  |
| chr7:128730026:D | 128730026 | CT/C      | 0.38 | 0.35    | I/I         | 1.17 (0.99-1.38)                  | 7.11E-02  | 1.10 (1.00-1.21) | 4.77E-02  | 0.54           | 0                     | 1.12 (1.00-1.25) | 8.38E-03      |  |
| rs12672081       | 128634360 | C/T       | 0.04 | 0.05    | I/I         | 0.82 (0.54-1.25)                  | 3.58E-01  | 0.74 (0.58-0.94) | 1.29E-02  | 0.65           | 0                     | 0.76 (0.57-1.02) | 9.46E-03      |  |
| rs3993439        | 128679934 | G/C       | 0.02 | 0.02    | I/I         | 0.60 (0.32-1.12)                  | 1.12E-01  | 0.69 (0.49-0.98) | 3.92E-02  | 0.70           | 0                     | 0.67 (0.44-1.02) | 9.54E-03      |  |
| rs142584143      | 128656246 | C/G       | 0.04 | 0.05    | I/I         | 0.82 (0.54-1.25)                  | 3.58E-01  | 0.74 (0.58-0.94) | 1.35E-02  | 0.66           | 0                     | 0.76 (0.57-1.02) | 9.85E-03      |  |
| rs2290231        | 128626557 | A/G       | 0.04 | 0.05    | O/O         | 0.82 (0.54-1.25)                  | 3.55E-01  | 0.74 (0.58-0.94) | 1.41E-02  | 0.67           | 0                     | 0.76 (0.57-1.02) | 1.01E-02      |  |
| rs75437801       | 128646300 | T/C       | 0.04 | 0.05    | I/I         | 0.82 (0.54-1.25)                  | 3.58E-01  | 0.74 (0.58-0.94) | 1.41E-02  | 0.66           | 0                     | 0.76 (0.57-1.02) | 1.03E-02      |  |
| rs74973211       | 128647394 | T/C       | 0.04 | 0.05    | I/I         | 0.82 (0.54-1.25)                  | 3.58E-01  | 0.74 (0.58-0.94) | 1.43E-02  | 0.67           | 0                     | 0.76 (0.57-1.02) | 1.04E-02      |  |
| rs142681586      | 128671110 | G/A       | 0.04 | 0.05    | I/I         | 0.82 (0.54-1.25)                  | 3.58E-01  | 0.74 (0.58-0.94) | 1.44E-02  | 0.67           | 0                     | 0.76 (0.57-1.02) | 1.05E-02      |  |
| rs75456523       | 128668952 | A/G       | 0.04 | 0.05    | I/I         | 0.82 (0.54-1.25)                  | 3.58E-01  | 0.74 (0.58-0.94) | 1.44E-02  | 0.67           | 0                     | 0.76 (0.57-1.02) | 1.05E-02      |  |
| rs148715708      | 128651541 | C/T       | 0.04 | 0.05    | I/I         | 0.82 (0.54-1.25)                  | 3.58E-01  | 0.74 (0.58-0.94) | 1.47E-02  | 0.67           | 0                     | 0.76 (0.57-1.02) | 1.06E-02      |  |
| rs139623125      | 128652145 | C/T       | 0.04 | 0.05    | I/I         | 0.82 (0.54-1.25)                  | 3.58E-01  | 0.74 (0.58-0.94) | 1.49E-02  | 0.67           | 0                     | 0.76 (0.57-1.02) | 1.08E-02      |  |
| rs145696656      | 128674681 | C/T       | 0.04 | 0.05    | I/I         | 0.84 (0.55-1.27)                  | 4.00E-01  | 0.74 (0.58-0.94) | 1.32E-02  | 0.61           | 0                     | 0.76 (0.57-1.02) | 1.09E-02      |  |
| rs75279435       | 128689077 | T/C       | 0.04 | 0.05    | I/I         | 0.84 (0.56-1.27)                  | 4.09E-01  | 0.74 (0.58-0.94) | 1.31E-02  | 0.59           | 0                     | 0.77 (0.57-1.02) | 1.10E-02      |  |
| rs73461593       | 128586760 | C/T       | 0.01 | 0.02    | O/I         | 0.64 (0.32-1.27)                  | 2.02E-01  | 0.58 (0.36-0.94) | 2.80E-02  | 0.82           | 0                     | 0.60 (0.35-1.03) | 1.11E-02      |  |
| rs6467225        | 128710287 | G/A       | 0.14 | 0.16    | I/I         | 0.83 (0.65-1.04)                  | 1.06E-01  | 0.88 (0.77-1.00) | 4.77E-02  | 0.65           | 0                     | 0.86 (0.74-1.01) | 1.12E-02      |  |
| chr7:128615714:D | 128615714 | GAAC/G    | 0.04 | 0.05    | I/I         | 0.80 (0.52-1.22)                  | 2.92E-01  | 0.75 (0.59-0.96) | 1.97E-02  | 0.82           | 0                     | 0.77 (0.57-1.02) | 1.12E-02      |  |
| rs55906661       | 128685463 | T/C       | 0.04 | 0.05    | I/I         | 0.83 (0.55-1.26)                  | 3.87E-01  | 0.74 (0.58-0.94) | 1.44E-02  | 0.63           | 0                     | 0.77 (0.57-1.02) | 1.13E-02      |  |
| rs4728148        | 128731560 | T/C       | 0.19 | 0.21    | O/O         | 0.98 (0.81-1.21)                  | 8.84E-01  | 0.84 (0.75-0.95) | 4.03E-03  | 0.19           | 41                    | 0.88 (0.77-1.01) | 1.20E-02      |  |
| rs144980742      | 128578135 | C/A       | 0.04 | 0.05    | I/I         | 0.79 (0.52-1.21)                  | 2.82E-01  | 0.76 (0.60-0.96) | 2.21E-02  | 0.86           | 0                     | 0.77 (0.57-1.03) | 1.20E-02      |  |
| rs74542576       | 128601772 | C/A       | 0.04 | 0.05    | I/I         | 0.82 (0.54-1.25)                  | 3.58E-01  | 0.75 (0.59-0.95) | 1.71E-02  | 0.69           | 0                     | 0.77 (0.58-1.03) | 1.22E-02      |  |
| rs61559743       | 128728310 | C/T       | 0.04 | 0.05    | I/I         | 0.83 (0.55-1.25)                  | 3.70E-01  | 0.75 (0.59-0.95) | 1.69E-02  | 0.69           | 0                     | 0.77 (0.58-1.03) | 1.25E-02      |  |
| chr7:128618098:1 | 128618098 | C/CA      | 0.04 | 0.05    | I/I         | 0.82 (0.54-1.25)                  | 3.58E-01  | 0.75 (0.59-0.95) | 1.77E-02  | 0.70           | 0                     | 0.77 (0.58-1.03) | 1.25E-02      |  |
| rs6980198        | 128693996 | T/C       | 0.02 | 0.02    | O/O         | 0.59 (0.32-1.10)                  | 9.61E-02  | 0.72 (0.51-1.01) | 5.73E-02  | 0.58           | 0                     | 0.68 (0.45-1.03) | 1.26E-02      |  |
| chr7:128649959:1 | 128649959 | G/GAA     | 0.04 | 0.05    | I/I         | 0.82 (0.54-1.25)                  | 3.58E-01  | 0.75 (0.59-0.95) | 1.79E-02  | 0.70           | 0                     | 0.77 (0.58-1.03) | 1.26E-02      |  |
| rs4731542        | 128730606 | C/A       | 0.19 | 0.21    | O/O         | 0.95 (0.78-1.17)                  | 6.43E-01  | 0.86 (0.76-0.96) | 7.98E-03  | 0.36           | 0                     | 0.88 (0.77-1.    |               |  |

**Supplementary Table 7.** Association analysis in *IRF5*

| SNP              | BP        | Alleles   |      | MAF     |             | Observed or Imputed in Dataset1/2 | Dataset 1 |                  | Dataset 2 |       | Test of heterogeneity |                  | Meta analysis |  |
|------------------|-----------|-----------|------|---------|-------------|-----------------------------------|-----------|------------------|-----------|-------|-----------------------|------------------|---------------|--|
|                  |           | maj / min | Case | Control | OR (95% CI) |                                   | P         | OR (95% CI)      | P         | $P_Q$ | $I^2$                 | OR (95% CI)      | P             |  |
|                  |           |           |      |         |             |                                   |           |                  |           |       |                       |                  |               |  |
| rs960633         | 128560761 | G/T       | 0.31 | 0.29    | O/O         | 1.04 (0.88-1.25)                  | 6.26E-01  | 1.14 (1.03-1.26) | 8.40E-03  | 0.40  | 0                     | 1.11 (0.99-1.25) | 1.27E-02      |  |
| rs55706405       | 128692260 | G/A       | 0.04 | 0.05    | O/O         | 0.81 (0.53-1.23)                  | 3.17E-01  | 0.76 (0.60-0.96) | 2.07E-02  | 0.78  | 0                     | 0.77 (0.58-1.03) | 1.28E-02      |  |
| rs7455711        | 128702426 | A/G       | 0.36 | 0.34    | I/I         | 1.11 (0.94-1.31)                  | 2.14E-01  | 1.11 (1.01-1.22) | 3.15E-02  | 1.00  | 0                     | 1.11 (0.99-1.25) | 1.31E-02      |  |
| rs111666147      | 128704463 | G/C       | 0.15 | 0.17    | I/I         | 0.99 (0.80-1.23)                  | 9.39E-01  | 0.83 (0.73-0.94) | 3.95E-03  | 0.16  | 49                    | 0.87 (0.75-1.02) | 1.31E-02      |  |
| rs76344592       | 128702110 | G/A       | 0.04 | 0.05    | I/I         | 0.85 (0.56-1.29)                  | 4.34E-01  | 0.74 (0.58-0.94) | 1.48E-02  | 0.59  | 0                     | 0.77 (0.58-1.03) | 1.32E-02      |  |
| rs56351500       | 128590488 | A/G       | 0.04 | 0.05    | O/I         | 0.82 (0.54-1.24)                  | 3.35E-01  | 0.75 (0.59-0.96) | 2.05E-02  | 0.75  | 0                     | 0.77 (0.58-1.03) | 1.33E-02      |  |
| rs79890422       | 128688590 | T/C       | 0.04 | 0.05    | I/I         | 0.83 (0.55-1.26)                  | 3.86E-01  | 0.75 (0.59-0.95) | 1.76E-02  | 0.67  | 0                     | 0.77 (0.58-1.03) | 1.35E-02      |  |
| rs75282194       | 128588475 | C/A       | 0.04 | 0.05    | I/I         | 0.82 (0.54-1.24)                  | 3.35E-01  | 0.76 (0.60-0.96) | 2.08E-02  | 0.75  | 0                     | 0.77 (0.58-1.03) | 1.35E-02      |  |
| rs76408499       | 128681072 | A/G       | 0.04 | 0.05    | I/I         | 0.83 (0.55-1.26)                  | 3.87E-01  | 0.75 (0.59-0.95) | 1.77E-02  | 0.67  | 0                     | 0.77 (0.58-1.03) | 1.36E-02      |  |
| rs79772075       | 128681106 | T/C       | 0.04 | 0.05    | I/I         | 0.83 (0.55-1.26)                  | 3.87E-01  | 0.75 (0.59-0.95) | 1.77E-02  | 0.67  | 0                     | 0.77 (0.58-1.03) | 1.36E-02      |  |
| rs80049896       | 128679133 | G/A       | 0.04 | 0.05    | I/I         | 0.83 (0.55-1.26)                  | 3.87E-01  | 0.75 (0.59-0.95) | 1.77E-02  | 0.67  | 0                     | 0.77 (0.58-1.03) | 1.36E-02      |  |
| chr7:128675286:1 | 128675286 | C/indel   | 0.04 | 0.05    | I/I         | 0.83 (0.55-1.26)                  | 3.87E-01  | 0.75 (0.59-0.95) | 1.79E-02  | 0.67  | 0                     | 0.77 (0.58-1.03) | 1.37E-02      |  |
| rs4731543        | 128730612 | C/T       | 0.19 | 0.21    | O/O         | 0.92 (0.75-1.13)                  | 4.41E-01  | 0.87 (0.77-0.97) | 1.56E-02  | 0.61  | 0                     | 0.88 (0.77-1.02) | 1.40E-02      |  |
| rs76076677       | 128705040 | A/G       | 0.04 | 0.05    | I/I         | 0.85 (0.56-1.29)                  | 4.34E-01  | 0.74 (0.58-0.95) | 1.60E-02  | 0.60  | 0                     | 0.77 (0.58-1.03) | 1.41E-02      |  |
| rs767004         | 128714846 | A/C       | 0.04 | 0.05    | I/I         | 0.91 (0.61-1.34)                  | 6.17E-01  | 0.73 (0.58-0.93) | 1.02E-02  | 0.37  | 0                     | 0.78 (0.59-1.03) | 1.46E-02      |  |
| rs7790824        | 128737274 | G/A       | 0.39 | 0.42    | O/O         | 0.95 (0.80-1.12)                  | 5.39E-01  | 0.89 (0.81-0.98) | 1.35E-02  | 0.49  | 0                     | 0.91 (0.81-1.01) | 1.56E-02      |  |
| rs11770861       | 128730177 | C/T       | 0.19 | 0.21    | O/O         | 0.94 (0.76-1.15)                  | 5.19E-01  | 0.87 (0.77-0.97) | 1.52E-02  | 0.52  | 0                     | 0.89 (0.77-1.02) | 1.65E-02      |  |
| rs111764833      | 128732414 | A/G       | 0.06 | 0.08    | I/I         | 1.07 (0.79-1.44)                  | 6.62E-01  | 0.74 (0.61-0.90) | 1.90E-03  | 0.04  | 76                    | 0.82 (0.66-1.02) | 1.66E-02      |  |
| rs11538884       | 128612552 | C/T       | 0.04 | 0.05    | I/I         | 0.81 (0.53-1.23)                  | 3.16E-01  | 0.77 (0.61-0.97) | 2.80E-02  | 0.84  | 0                     | 0.78 (0.58-1.04) | 1.67E-02      |  |
| rs3817555        | 128619521 | G/A       | 0.04 | 0.05    | O/O         | 0.82 (0.54-1.24)                  | 3.35E-01  | 0.77 (0.60-0.97) | 2.66E-02  | 0.80  | 0                     | 0.78 (0.59-1.04) | 1.68E-02      |  |
| rs56321638       | 128590733 | C/T       | 0.04 | 0.05    | I/I         | 0.82 (0.54-1.25)                  | 3.56E-01  | 0.76 (0.60-0.97) | 2.54E-02  | 0.76  | 0                     | 0.78 (0.58-1.04) | 1.71E-02      |  |
| rs6953731        | 128731188 | G/C       | 0.19 | 0.20    | I/I         | 0.98 (0.80-1.20)                  | 8.63E-01  | 0.85 (0.76-0.96) | 6.80E-03  | 0.23  | 30                    | 0.89 (0.77-1.02) | 1.71E-02      |  |
| rs139294369      | 128705730 | T/A       | 0.02 | 0.02    | I/I         | 1.26 (0.72-2.19)                  | 4.13E-01  | 1.47 (1.06-2.03) | 2.15E-02  | 0.64  | 0                     | 1.40 (0.95-2.08) | 1.72E-02      |  |
| rs730798         | 128730535 | G/A       | 0.19 | 0.21    | O/O         | 0.95 (0.78-1.16)                  | 6.11E-01  | 0.86 (0.77-0.97) | 1.29E-02  | 0.43  | 0                     | 0.89 (0.77-1.02) | 1.75E-02      |  |
| rs10247548       | 128554251 | C/T       | 0.01 | 0.01    | I/I         | 0.21 (0.05-0.91)                  | 3.63E-02  | 0.68 (0.41-1.13) | 1.39E-01  | 0.14  | 55                    | 0.49 (0.23-1.06) | 1.79E-02      |  |
| rs6953800        | 128731391 | C/T       | 0.19 | 0.21    | O/O         | 0.98 (0.80-1.20)                  | 8.47E-01  | 0.85 (0.76-0.96) | 7.68E-03  | 0.25  | 25                    | 0.89 (0.77-1.02) | 1.83E-02      |  |
| chr7:128730961:D | 128730961 | GA/G      | 0.19 | 0.21    | I/I         | 0.96 (0.79-1.18)                  | 7.12E-01  | 0.86 (0.77-0.97) | 1.12E-02  | 0.35  | 0                     | 0.89 (0.77-1.02) | 1.91E-02      |  |
| rs6954102        | 128731387 | G/A       | 0.19 | 0.21    | O/I         | 0.98 (0.80-1.20)                  | 8.62E-01  | 0.86 (0.76-0.96) | 7.99E-03  | 0.25  | 26                    | 0.89 (0.77-1.02) | 1.93E-02      |  |
| rs12673511       | 128590921 | G/A       | 0.04 | 0.05    | O/O         | 0.82 (0.54-1.25)                  | 3.52E-01  | 0.77 (0.61-0.97) | 2.95E-02  | 0.80  | 0                     | 0.78 (0.59-1.04) | 1.94E-02      |  |
| rs6973571        | 128731327 | T/C       | 0.19 | 0.21    | I/I         | 0.96 (0.78-1.18)                  | 7.08E-01  | 0.86 (0.77-0.97) | 1.21E-02  | 0.36  | 0                     | 0.89 (0.77-1.02) | 2.00E-02      |  |
| rs6953648        | 128731371 | A/G       | 0.19 | 0.21    | I/I         | 0.98 (0.80-1.19)                  | 8.10E-01  | 0.86 (0.77-0.96) | 9.76E-03  | 0.29  | 12                    | 0.89 (0.77-1.02) | 2.05E-02      |  |
| rs3757384        | 128695646 | C/A       | 0.04 | 0.05    | O/O         | 0.83 (0.55-1.26)                  | 3.87E-01  | 0.77 (0.61-0.97) | 2.84E-02  | 0.75  | 0                     | 0.79 (0.59-1.05) | 2.06E-02      |  |
| rs6968563        | 128577731 | T/C       | 0.04 | 0.05    | O/O         | 0.82 (0.55-1.22)                  | 3.24E-01  | 0.78 (0.62-0.98) | 3.44E-02  | 0.84  | 0                     | 0.79 (0.60-1.04) | 2.06E-02      |  |
| rs6963790        | 128698168 | G/A       | 0.02 | 0.02    | I/I         | 0.60 (0.32-1.12)                  | 1.09E-01  | 0.74 (0.53-1.05) | 8.97E-02  | 0.55  | 0                     | 0.70 (0.46-1.07) | 2.21E-02      |  |
| rs56126947       | 128726468 | C/T       | 0.07 | 0.08    | I/I         | 1.04 (0.78-1.40)                  | 7.70E-01  | 0.76 (0.63-0.92) | 4.00E-03  | 0.07  | 69                    | 0.83 (0.67-1.03) | 2.26E-02      |  |
| rs144200064      | 128588610 | T/G       | 0.01 | 0.02    | I/I         | 0.55 (0.27-1.13)                  | 1.05E-01  | 0.71 (0.47-1.06) | 9.53E-02  | 0.56  | 0                     | 0.66 (0.40-1.08) | 2.29E-02      |  |
| rs73467232       | 128722656 | T/G       | 0.04 | 0.05    | I/I         | 0.94 (0.63-1.42)                  | 7.84E-01  | 0.74 (0.58-0.94) | 1.22E-02  | 0.30  | 8                     | 0.79 (0.59-1.05) | 2.32E-02      |  |
| rs6953497        | 128731316 | A/G       | 0.19 | 0.21    | I/I         | 0.98 (0.80-1.20)                  | 8.46E-01  | 0.86 (0.77-0.97) | 1.10E-02  | 0.28  | 15                    | 0.89 (0.78-1.03) | 2.40E-02      |  |
| rs150351454      | 128687077 | A/G       | 0.01 | 0.02    | I/I         | 0.55 (0.27-1.13)                  | 1.05E-01  | 0.72 (0.48-1.07) | 1.00E-01  | 0.54  | 0                     | 0.67 (0.41-1.08) | 2.42E-02      |  |
| rs111681097      | 128567105 | A/C       | 0.01 | 0.01    | I/I         | 0.83 (0.37-1.85)                  | 6.44E-01  | 0.54 (0.32-0.90) | 1.87E-02  | 0.37  | 0                     | 0.61 (0.33-1.10) | 2.52E-02      |  |
| rs34632345       | 128603415 | C/A       | 0.14 | 0.15    | I/I         | 0.83 (0.66-1.05)                  | 1.21E-01  | 0.90 (0.79-1.02) | 9.71E-02  | 0.58  | 0                     | 0.88 (0.75-1.03) | 2.58E-02      |  |
| rs60811897       | 128737399 | G/T       | 0.04 | 0.05    | O/O         | 0.97 (0.66-1.42)                  | 8.57E-01  | 0.75 (0.60-0.94) | 1.25E-02  | 0.26  | 20                    | 0.80 (0.61-1.06) | 2.71E-02      |  |
| rs35163364       | 128732786 | C/T       | 0.40 | 0.43    | I/I         | 0.92 (0.78-1.09)                  | 3.35E-01  | 0.91 (0.83-1.00) | 4.54E-02  | 0.89  | 0                     | 0.91 (0.81-1.02) | 2.73E-02      |  |
| rs73467230       | 128722340 | G/T       | 0.04 | 0.05    | O/O         | 0.94 (0.63-1.40)                  | 7.48E-01  | 0.75 (0.59-0.95) | 1.63E-02  | 0.34  | 0                     | 0.80 (0.60-1.06) | 2.74E-02      |  |
| rs117232856      | 128620564 | G/A       | 0.01 | 0.02    | I/I         | 0.55 (0.27-1.13)                  | 1.05E-01  | 0.73 (0.49-1.08) | 1.19E-01  | 0.51  | 0                     | 0.67 (0.41-1.10) | 2.89E-02      |  |
| rs77237876       | 128625989 | A/G       | 0.01 | 0.02    | I/I         | 0.55 (0.27-1.13)                  | 1.05E-01  | 0.73 (0.49-1.08) | 1.19E-01  | 0.51  | 0                     | 0.67 (0.41-1.10) | 2.89E-02      |  |
| rs7783840        | 128711699 | T/C       | 0.20 | 0.22    | O/O         | 0.98 (0.80-1.19)                  | 8.14E-01  | 0.87 (0.78-0.97) | 1.53E-02  | 0.32  | 0                     | 0.90 (0.78-1.03) | 2.94E-02      |  |
| chr7:128734189:1 | 128734189 | G/GA      | 0.39 | 0.42    | I/I         | 0.94 (0.79-1.11)                  | 4.49E-01  | 0.91 (0.82-1.00) | 4.28E-02  | 0.73  | 0                     | 0.91 (0.81-1.03) | 3.41E-02      |  |
| rs113045281      | 128652306 | C/T       | 0.07 | 0.08    | I/I         | 0.90 (0.66-1.24)                  | 5.27E-01  | 0.83 (0.69-0.99) | 3.57E-02  | 0.62  | 0                     | 0.85 (0.68-1.05) | 3.44E-02      |  |
| rs59863842       | 128726665 | G/A       | 0.03 | 0.04    | I/I         | 0.89 (0.58-1.38)                  | 6.13E-01  | 0.76 (0.59-0.98) | 3.16E-02  | 0.52  | 0                     | 0.80 (0.59-1.08) | 3.66E-02      |  |
| rs17339221       | 128625914 | A/G       | 0.14 | 0.16    | O/O         | 0.96 (0.77-1.21)                  | 7.58E-01  | 0.86 (0.75-0.98) | 2.46E-02  | 0.39  | 0                     | 0.89 (0.76-1.04) | 3.87E-02      |  |
| rs6966125        | 128598525 | C/G       | 0.14 | 0.16    | I/I         | 0.83 (0.66-1.05)                  | 1.19E-01  | 0.91 (0.80-1.03) | 1.51E-01  | 0.50  | 0                     | 0.89 (0.75-1.04) | 4.06E-02      |  |
| rs117420760      | 128586737 | G/A       | 0.01 | 0.01    | I/I         | 0.74 (0.35-1.56)                  | 4.33E-01  | 0.64 (0.40-1.01) | 5.48E-02  | 0.72  | 0                     | 0.66 (0.39-1.14) | 4.11E-02      |  |
| rs73240322       | 128646939 | C/T       | 0.05 | 0.06    | O/O         | 0.87 (0.61-1.24)                  | 4.33E-01  | 0.82 (0.67-1.00) | 5.65E-02  | 0.79  | 0                     | 0.83 (0.65-1.07) | 4.21E-02      |  |
| rs73228765       | 128699523 | T/C       | 0.14 | 0.16    | O/O         | 0.97 (0.77-1.21)                  | 7.79E-01  | 0.86 (0.76-0.98) | 2.64E-02  | 0.38  | 0                     | 0.89 (0.76-1.04) | 4.23E-02      |  |
| rs58012608       | 128726050 | G/A       | 0.03 | 0.04    | I/I         | 0.89 (0.58-1.36)                  | 5.80E-01  | 0.77 (0.60-0.99) | 4.06E-02  | 0.58  | 0                     | 0.80 (0.59-1.08) | 4.26E-02      |  |
| rs73228764       | 128698815 | T/C       | 0.14 | 0.16    | O/O         | 0.97 (0.77-1.21)                  | 7.79E-01  | 0.86 (0.76-0.98) | 2.73E-02  | 0.39  | 0                     | 0.89 (0.76-1.04) | 4.35E-02      |  |
| rs118038021      | 128609874 | C/T       | 0.01 | 0.02    | I/I         | 0.82 (0.44-1.53)                  | 5.37E-01  | 0.64 (0.42-0.99) | 4.61E-02  | 0.53  | 0                     | 0.69 (0.42-1.12) | 4.38E-02      |  |
| rs4728149        | 128731693 | A/G       | 0.04 | 0.05    | O/I         | 0.99 (0.68-1.45)                  | 9.67E-01  | 0.77 (0.61-0.96) | 2.04E-02  | 0.25  | 24                    | 0.82 (0.63-1.08) | 4.71E-02      |  |
| rs1495460        | 128554964 | C/T       | 0.01 | 0.01    | I/I         | 0.21 (0.05-0.91)                  | 3.67E-02  | 0.78 (0.49-1.26) | 3.08E-01  | 0.10  | 64                    | 0.54 (0.26-1.15) | 4.81E-02      |  |
| rs60319853       | 128727020 | T/A       | 0.03 | 0.04    | I/I         | 0.89 (0.58-1.36)                  | 5.80E-01  | 0.78 (0.61-1.00) | 4.77E-02  | 0.61  | 0                     | 0.81 (0.60-1.09) | 4.87E-02      |  |
| rs12673075       | 128736219 | G/A       | 0.04 | 0.05    | I/I         | 0.98 (0.66-1.44)                  | 9.08E-01  | 0.77 (0.62-0.97) | 2.44E-02  | 0.30  | 7                     | 0.83 (0.63-1.08) | 4.91E-02      |  |
| rs1154330        | 128625788 | A/G       | 0.14 | 0.16    | O/O         | 0.97 (0.77-1.22)                  | 8.19E-01  | 0.87 (0.76-0.99) | 3.14E-02  | 0.38  | 0                     | 0.90 (0.76-1.05) | 5.19E-02      |  |
| rs41274158       | 128629993 | A/G       | 0.14 | 0.16    | O/O         | 0.96 (0.77-1.21)                  | 7.51E-01  | 0.87 (0.76-0.99) | 3.66E-02  | 0.45  | 0                     | 0.90 (0.76-1.05) | 5.25E-02      |  |
| rs73467261       | 128738568 | G/A       | 0.04 | 0.05    | O/I         | 0.97 (0.66-1.43)                  | 8.89E-01  | 0.78 (0.62-0.97) | 2.80E-02  | 0.32  | 0                     | 0.83 (0.63-1.08) | 5.30E-02      |  |
| rs143884303      | 128627723 | C/A       | 0.01 | 0.01    | I/I         | 0.72 (0.35-1.51)                  | 3.90E-01  | 0.67 (0.43-1.05) | 8.18E-02  | 0.87  | 0                     | 0.69 (0.41-1.17) | 5.36E-02      |  |
| rs4731544        | 128732201 | A/G       | 0.39 | 0.41    | O/O         | 0.92 (0.78-1.08)                  | 3.01E-01  | 0.93 (0.84-1.02) | 1.03E-01  | 0.92  | 0                     | 0.92 (0.82-1.03) | 5.37E-02      |  |
| rs62478618       | 128713672 | A/G       | 0.02 | 0.01    | I/I         | 1.62 (0.95-2.77)                  | 7.50E-02  | 1.23 (0.86-1.75) | 2.49E-01  | 0.40  | 0                     | 1.33 (0.89-2.00) | 5.44E-02      |  |
| rs55738239       | 128735773 | A/C       | 0.02 | 0.02    | O/O         | 0.72 (0.39-1.34)                  | 3.02E-01  | 0.77 (0.56-1.06) | 1.08E-01  | 0.86  | 0                     | 0.76 (0.51-1.13) |               |  |



**Supplementary Table 7.** Association analysis in *IRF5*

| SNP              | BP        | Alleles   |      | MAF     |             | Observed or Imputed in Dataset1/2 | Dataset 1 |                  | Dataset 2 |       | Test of heterogeneity |                  | Meta analysis |  |
|------------------|-----------|-----------|------|---------|-------------|-----------------------------------|-----------|------------------|-----------|-------|-----------------------|------------------|---------------|--|
|                  |           | maj / min | Case | Control | OR (95% CI) |                                   | P         | OR (95% CI)      | P         | $P_Q$ | $I^2$                 | OR (95% CI)      | P             |  |
|                  |           |           |      |         |             |                                   |           |                  |           |       |                       |                  |               |  |
| rs76524817       | 128730920 | G/A       | 0.02 | 0.02    | I/I         | 0.57 (0.29-1.14)                  | 1.10E-01  | 0.81 (0.58-1.14) | 2.20E-01  | 0.37  | 0                     | 0.73 (0.47-1.14) | 5.89E-02      |  |
| rs79288514       | 128582658 | C/T       | 0.10 | 0.12    | I/I         | 1.06 (0.82-1.37)                  | 6.46E-01  | 0.83 (0.71-0.96) | 1.22E-02  | 0.10  | 63                    | 0.89 (0.74-1.06) | 6.05E-02      |  |
| rs147338724      | 128733075 | G/A       | 0.01 | 0.02    | I/I         | 0.51 (0.24-1.08)                  | 7.73E-02  | 0.80 (0.54-1.19) | 2.69E-01  | 0.29  | 11                    | 0.70 (0.43-1.15) | 6.07E-02      |  |
| rs1609544        | 128550030 | G/A       | 0.15 | 0.17    | I/I         | 0.94 (0.75-1.17)                  | 5.75E-01  | 0.89 (0.78-1.01) | 6.50E-02  | 0.68  | 0                     | 0.90 (0.77-1.05) | 6.25E-02      |  |
| chr7:128614691:D | 128614691 | indel/G   | 0.10 | 0.11    | I/I         | 1.07 (0.83-1.39)                  | 5.90E-01  | 0.82 (0.71-0.96) | 1.12E-02  | 0.08  | 67                    | 0.89 (0.74-1.06) | 6.26E-02      |  |
| rs77607989       | 128677292 | T/C       | 0.10 | 0.12    | I/I         | 1.08 (0.84-1.39)                  | 5.55E-01  | 0.82 (0.71-0.96) | 1.09E-02  | 0.07  | 69                    | 0.89 (0.74-1.06) | 6.54E-02      |  |
| rs75230752       | 128680432 | C/T       | 0.10 | 0.12    | I/I         | 1.08 (0.84-1.39)                  | 5.54E-01  | 0.82 (0.71-0.96) | 1.10E-02  | 0.07  | 69                    | 0.89 (0.74-1.06) | 6.58E-02      |  |
| rs79260940       | 128680362 | T/C       | 0.10 | 0.12    | I/I         | 1.08 (0.84-1.39)                  | 5.54E-01  | 0.82 (0.71-0.96) | 1.10E-02  | 0.07  | 69                    | 0.89 (0.74-1.06) | 6.58E-02      |  |
| rs74494428       | 128673892 | G/A       | 0.10 | 0.12    | I/I         | 1.08 (0.84-1.40)                  | 5.41E-01  | 0.82 (0.71-0.96) | 1.07E-02  | 0.07  | 70                    | 0.89 (0.74-1.06) | 6.63E-02      |  |
| rs7792282        | 128549568 | A/G       | 0.17 | 0.18    | I/I         | 0.90 (0.72-1.12)                  | 3.36E-01  | 0.91 (0.81-1.02) | 1.19E-01  | 0.92  | 0                     | 0.91 (0.78-1.05) | 6.68E-02      |  |
| rs111720106      | 128725386 | G/A       | 0.06 | 0.07    | I/I         | 1.08 (0.80-1.47)                  | 6.17E-01  | 0.78 (0.64-0.95) | 1.36E-02  | 0.08  | 67                    | 0.86 (0.68-1.08) | 6.85E-02      |  |
| rs56357552       | 128726884 | T/C       | 0.14 | 0.15    | I/I         | 0.98 (0.78-1.22)                  | 8.28E-01  | 0.87 (0.77-1.00) | 4.42E-02  | 0.41  | 0                     | 0.90 (0.77-1.06) | 6.90E-02      |  |
| rs149554457      | 128704760 | A/G       | 0.01 | 0.01    | I/I         | 0.62 (0.26-1.51)                  | 2.91E-01  | 0.72 (0.46-1.11) | 1.38E-01  | 0.78  | 0                     | 0.69 (0.39-1.21) | 6.91E-02      |  |
| rs6957529        | 128605460 | T/C       | 0.10 | 0.12    | O/I         | 1.08 (0.84-1.40)                  | 5.35E-01  | 0.83 (0.71-0.96) | 1.12E-02  | 0.07  | 69                    | 0.89 (0.75-1.07) | 6.91E-02      |  |
| rs76696583       | 128690164 | G/A       | 0.10 | 0.12    | I/I         | 1.09 (0.85-1.41)                  | 5.01E-01  | 0.82 (0.71-0.96) | 1.04E-02  | 0.06  | 71                    | 0.89 (0.75-1.07) | 6.97E-02      |  |
| rs112659365      | 128601764 | T/G       | 0.07 | 0.08    | I/I         | 0.97 (0.71-1.33)                  | 8.40E-01  | 0.83 (0.69-1.00) | 4.50E-02  | 0.41  | 0                     | 0.87 (0.70-1.08) | 7.12E-02      |  |
| rs62481981       | 128568792 | G/A       | 0.02 | 0.01    | O/O         | 1.68 (0.91-3.08)                  | 9.51E-02  | 1.24 (0.84-1.81) | 2.80E-01  | 0.40  | 0                     | 1.35 (0.86-2.10) | 7.15E-02      |  |
| rs4731545        | 128732262 | C/G       | 0.39 | 0.41    | I/I         | 0.92 (0.78-1.09)                  | 3.31E-01  | 0.93 (0.85-1.02) | 1.30E-01  | 0.92  | 0                     | 0.93 (0.83-1.04) | 7.19E-02      |  |
| rs112868952      | 128686929 | G/A       | 0.10 | 0.12    | I/I         | 1.08 (0.84-1.40)                  | 5.44E-01  | 0.83 (0.71-0.96) | 1.25E-02  | 0.08  | 68                    | 0.89 (0.75-1.07) | 7.28E-02      |  |
| rs56413809       | 128735832 | G/A       | 0.02 | 0.02    | O/O         | 0.73 (0.39-1.34)                  | 3.06E-01  | 0.79 (0.57-1.08) | 1.44E-01  | 0.81  | 0                     | 0.77 (0.52-1.15) | 7.47E-02      |  |
| rs74983746       | 128658957 | G/C       | 0.10 | 0.12    | I/I         | 1.08 (0.84-1.40)                  | 5.40E-01  | 0.83 (0.71-0.96) | 1.28E-02  | 0.08  | 68                    | 0.89 (0.75-1.07) | 7.48E-02      |  |
| rs56340663       | 128724019 | T/C       | 0.07 | 0.08    | O/O         | 1.02 (0.76-1.38)                  | 8.79E-01  | 0.82 (0.69-0.98) | 2.99E-02  | 0.21  | 35                    | 0.87 (0.70-1.08) | 7.85E-02      |  |
| rs80159318       | 128593092 | A/G       | 0.10 | 0.12    | I/I         | 1.08 (0.84-1.40)                  | 5.33E-01  | 0.83 (0.72-0.96) | 1.38E-02  | 0.08  | 68                    | 0.90 (0.75-1.07) | 7.95E-02      |  |
| rs76576038       | 128602191 | G/A       | 0.10 | 0.12    | I/I         | 1.09 (0.85-1.41)                  | 4.96E-01  | 0.83 (0.71-0.96) | 1.26E-02  | 0.07  | 71                    | 0.90 (0.75-1.07) | 7.97E-02      |  |
| chr7:128621026:I | 128621026 | G/GA      | 0.10 | 0.12    | I/I         | 1.07 (0.83-1.38)                  | 6.08E-01  | 0.83 (0.72-0.97) | 1.66E-02  | 0.10  | 63                    | 0.89 (0.75-1.07) | 7.98E-02      |  |
| rs139355497      | 128671836 | A/G       | 0.02 | 0.01    | I/I         | 1.59 (0.85-3.00)                  | 1.50E-01  | 1.24 (0.86-1.78) | 2.49E-01  | 0.50  | 0                     | 1.33 (0.86-2.06) | 8.15E-02      |  |
| rs77264666       | 128584130 | A/G       | 0.10 | 0.12    | I/I         | 1.08 (0.84-1.39)                  | 5.54E-01  | 0.83 (0.72-0.97) | 1.58E-02  | 0.08  | 66                    | 0.90 (0.75-1.07) | 8.40E-02      |  |
| rs1495461        | 128551740 | T/C       | 0.31 | 0.30    | O/O         | 0.96 (0.80-1.14)                  | 6.26E-01  | 1.12 (1.02-1.24) | 1.94E-02  | 0.12  | 59                    | 1.07 (0.95-1.21) | 8.56E-02      |  |
| rs74573030       | 128599823 | C/T       | 0.10 | 0.12    | I/I         | 1.10 (0.85-1.42)                  | 4.81E-01  | 0.83 (0.72-0.96) | 1.35E-02  | 0.06  | 71                    | 0.90 (0.75-1.07) | 8.58E-02      |  |
| rs148115945      | 128675613 | T/C       | 0.01 | 0.01    | I/I         | 0.73 (0.31-1.67)                  | 4.50E-01  | 0.71 (0.45-1.10) | 1.22E-01  | 0.96  | 0                     | 0.71 (0.41-1.23) | 8.67E-02      |  |
| rs77416878       | 128591409 | C/T       | 0.10 | 0.12    | I/I         | 1.08 (0.84-1.40)                  | 5.33E-01  | 0.83 (0.72-0.97) | 1.58E-02  | 0.08  | 67                    | 0.90 (0.75-1.07) | 8.67E-02      |  |
| rs76623628       | 128653136 | C/A       | 0.01 | 0.01    | I/I         | 0.73 (0.31-1.67)                  | 4.50E-01  | 0.71 (0.46-1.10) | 1.25E-01  | 0.96  | 0                     | 0.71 (0.41-1.24) | 8.86E-02      |  |
| rs190286711      | 128602306 | C/G       | 0.01 | 0.01    | I/I         | 0.62 (0.27-1.41)                  | 2.54E-01  | 0.74 (0.46-1.18) | 2.00E-01  | 0.72  | 0                     | 0.70 (0.40-1.24) | 9.06E-02      |  |
| rs113092708      | 128627677 | C/G       | 0.01 | 0.02    | I/I         | 1.08 (0.58-2.00)                  | 8.09E-01  | 0.63 (0.42-0.96) | 3.19E-02  | 0.16  | 49                    | 0.74 (0.46-1.18) | 9.12E-02      |  |
| rs7768945        | 128548463 | A/C       | 0.16 | 0.17    | O/O         | 0.92 (0.74-1.15)                  | 4.75E-01  | 0.91 (0.80-1.03) | 1.25E-01  | 0.90  | 0                     | 0.91 (0.78-1.06) | 9.29E-02      |  |
| rs12268956       | 128730951 | A/G       | 0.14 | 0.15    | I/I         | 0.96 (0.77-1.20)                  | 7.23E-01  | 0.89 (0.78-1.01) | 7.93E-02  | 0.58  | 0                     | 0.91 (0.78-1.06) | 9.41E-02      |  |
| chr7:128739169:D | 128739169 | TC/T      | 0.06 | 0.07    | I/I         | 1.11 (0.81-1.51)                  | 5.12E-01  | 0.80 (0.66-0.96) | 1.74E-02  | 0.07  | 69                    | 0.87 (0.70-1.09) | 9.55E-02      |  |
| rs78053700       | 128739073 | A/G       | 0.06 | 0.07    | I/I         | 1.11 (0.81-1.51)                  | 5.12E-01  | 0.80 (0.66-0.96) | 1.74E-02  | 0.07  | 69                    | 0.87 (0.70-1.09) | 9.55E-02      |  |
| rs112636534      | 128579130 | A/T       | 0.01 | 0.01    | I/I         | 0.94 (0.46-1.92)                  | 8.76E-01  | 0.66 (0.43-1.03) | 6.54E-02  | 0.41  | 0                     | 0.73 (0.44-1.23) | 1.00E-01      |  |
| chr7:128548254:I | 128548254 | G/GA      | 0.16 | 0.17    | I/I         | 0.91 (0.73-1.14)                  | 4.26E-01  | 0.91 (0.81-1.03) | 1.57E-01  | 0.99  | 0                     | 0.91 (0.78-1.06) | 1.05E-01      |  |
| rs55902134       | 128543117 | C/A       | 0.15 | 0.15    | I/I         | 0.94 (0.75-1.19)                  | 6.29E-01  | 0.90 (0.79-1.02) | 1.10E-01  | 0.72  | 0                     | 0.91 (0.78-1.07) | 1.07E-01      |  |
| rs77349349       | 128609492 | G/A       | 0.01 | 0.01    | I/I         | 0.78 (0.34-1.80)                  | 5.61E-01  | 0.71 (0.46-1.10) | 1.25E-01  | 0.84  | 0                     | 0.73 (0.42-1.26) | 1.07E-01      |  |
| rs57989815       | 128720824 | G/A       | 0.07 | 0.08    | O/I         | 1.07 (0.79-1.45)                  | 6.63E-01  | 0.82 (0.68-0.98) | 3.03E-02  | 0.14  | 54                    | 0.88 (0.71-1.10) | 1.09E-01      |  |
| rs74482612       | 128718715 | C/A       | 0.06 | 0.07    | I/I         | 1.19 (0.87-1.62)                  | 2.80E-01  | 0.77 (0.63-0.94) | 1.12E-02  | 0.02  | 81                    | 0.87 (0.69-1.10) | 1.17E-01      |  |
| rs62481971       | 128541726 | G/T       | 0.15 | 0.15    | I/I         | 0.94 (0.75-1.19)                  | 6.10E-01  | 0.90 (0.79-1.03) | 1.28E-01  | 0.76  | 0                     | 0.91 (0.78-1.07) | 1.19E-01      |  |
| rs6927002        | 128539728 | C/A       | 0.15 | 0.15    | I/I         | 0.95 (0.75-1.20)                  | 6.16E-01  | 0.90 (0.79-1.03) | 1.20E-01  | 0.71  | 0                     | 0.92 (0.78-1.07) | 1.21E-01      |  |
| rs56144153       | 128544133 | G/T       | 0.15 | 0.15    | I/I         | 0.95 (0.76-1.20)                  | 6.78E-01  | 0.90 (0.79-1.03) | 1.20E-01  | 0.69  | 0                     | 0.92 (0.78-1.07) | 1.25E-01      |  |
| rs113893409      | 128720447 | G/A       | 0.06 | 0.07    | I/I         | 1.17 (0.86-1.60)                  | 3.20E-01  | 0.78 (0.64-0.95) | 1.49E-02  | 0.03  | 78                    | 0.88 (0.70-1.10) | 1.26E-01      |  |
| rs55708261       | 128712874 | G/A       | 0.06 | 0.07    | O/I         | 1.18 (0.86-1.62)                  | 3.02E-01  | 0.78 (0.63-0.95) | 1.42E-02  | 0.03  | 79                    | 0.88 (0.69-1.11) | 1.28E-01      |  |
| rs117366486      | 128598361 | C/T       | 0.02 | 0.03    | I/I         | 0.99 (0.60-1.64)                  | 9.69E-01  | 0.75 (0.54-1.03) | 7.81E-02  | 0.36  | 0                     | 0.81 (0.56-1.18) | 1.31E-01      |  |
| rs191053873      | 128598363 | A/T       | 0.02 | 0.03    | I/I         | 0.99 (0.60-1.64)                  | 9.69E-01  | 0.75 (0.54-1.03) | 7.81E-02  | 0.36  | 0                     | 0.81 (0.56-1.18) | 1.31E-01      |  |
| rs60591364       | 128549328 | T/A       | 0.16 | 0.17    | I/I         | 0.91 (0.73-1.14)                  | 4.27E-01  | 0.93 (0.82-1.05) | 2.28E-01  | 0.91  | 0                     | 0.92 (0.79-1.07) | 1.49E-01      |  |
| rs56155376       | 128736596 | G/A       | 0.07 | 0.08    | O/O         | 1.16 (0.86-1.57)                  | 3.30E-01  | 0.80 (0.67-0.97) | 2.06E-02  | 0.04  | 76                    | 0.89 (0.72-1.11) | 1.49E-01      |  |
| rs56332811       | 128545467 | C/T       | 0.14 | 0.15    | I/I         | 0.95 (0.75-1.20)                  | 6.50E-01  | 0.91 (0.80-1.04) | 1.57E-01  | 0.77  | 0                     | 0.92 (0.78-1.08) | 1.50E-01      |  |
| rs3807305        | 128581133 | G/A       | 0.01 | 0.02    | O/I         | 0.94 (0.46-1.91)                  | 8.66E-01  | 0.71 (0.47-1.08) | 1.11E-01  | 0.50  | 0                     | 0.77 (0.46-1.27) | 1.50E-01      |  |
| rs62478621       | 128717467 | C/A       | 0.05 | 0.06    | I/I         | 1.00 (0.71-1.40)                  | 9.83E-01  | 0.84 (0.68-1.03) | 9.11E-02  | 0.39  | 0                     | 0.88 (0.69-1.12) | 1.51E-01      |  |
| rs55780035       | 128716440 | T/C       | 0.05 | 0.06    | O/I         | 1.03 (0.74-1.45)                  | 8.47E-01  | 0.83 (0.67-1.01) | 6.86E-02  | 0.26  | 20                    | 0.88 (0.69-1.12) | 1.52E-01      |  |
| rs3778747        | 128617930 | G/A       | 0.01 | 0.02    | I/I         | 1.14 (0.61-2.11)                  | 6.87E-01  | 0.65 (0.43-1.00) | 5.19E-02  | 0.15  | 52                    | 0.77 (0.47-1.24) | 1.52E-01      |  |
| rs35383832       | 128540221 | C/T       | 0.16 | 0.17    | I/I         | 0.91 (0.72-1.14)                  | 3.99E-01  | 0.93 (0.82-1.05) | 2.48E-01  | 0.85  | 0                     | 0.92 (0.79-1.08) | 1.54E-01      |  |
| rs6978651        | 128646116 | C/A       | 0.01 | 0.02    | I/I         | 1.13 (0.61-2.10)                  | 6.94E-01  | 0.66 (0.43-1.01) | 5.43E-02  | 0.16  | 50                    | 0.77 (0.47-1.24) | 1.55E-01      |  |
| chr7:128549021:D | 128549021 | TG/T      | 0.16 | 0.17    | I/I         | 0.91 (0.72-1.14)                  | 3.98E-01  | 0.93 (0.82-1.05) | 2.52E-01  | 0.85  | 0                     | 0.92 (0.79-1.08) | 1.56E-01      |  |
| rs56395315       | 128715269 | G/C       | 0.06 | 0.07    | I/I         | 1.17 (0.86-1.61)                  | 3.19E-01  | 0.80 (0.66-0.97) | 2.11E-02  | 0.04  | 76                    | 0.89 (0.71-1.12) | 1.56E-01      |  |
| rs73461567       | 128573445 | G/A       | 0.01 | 0.02    | O/I         | 0.85 (0.42-1.71)                  | 6.41E-01  | 0.75 (0.50-1.13) | 1.68E-01  | 0.77  | 0                     | 0.78 (0.48-1.27) | 1.57E-01      |  |
| rs6948542        | 128547512 | G/A       | 0.16 | 0.17    | I/I         | 0.91 (0.73-1.14)                  | 4.30E-01  | 0.93 (0.82-1.05) | 2.42E-01  | 0.90  | 0                     | 0.92 (0.79-1.08) | 1.58E-01      |  |
| rs118116254      | 128704401 | T/A       | 0.03 | 0.02    | I/I         | 0.91 (0.55-1.50)                  | 7.04E-01  | 1.32 (0.99-1.75) | 5.97E-02  | 0.21  | 38                    | 1.19 (0.84-1.68) | 1.63E-01      |  |
| rs6467218        | 128548954 | G/A       | 0.16 | 0.17    | I/I         | 0.91 (0.73-1.14)                  | 4.27E-01  | 0.93 (0.82-1.05) | 2.51E-01  | 0.88  | 0                     | 0.93 (0.79-1.08) | 1.63E-01      |  |
| rs73463042       | 128622060 | G/C       | 0.01 | 0.02    | I/I         | 1.17 (0.63-2.17)                  | 6.23E-01  | 0.65 (0.43-1.00) | 5.08E-02  | 0.13  | 56                    | 0.77 (0.48-1.25) | 1.64E-01      |  |
| rs73465005       | 128685427 | G/A       | 0.01 | 0.02    | I/I         | 1.13 (0.61-2.10)                  | 6.94E-01  | 0.66 (0.43-1.01) | 5.88E-02  | 0.16  | 49                    | 0.77 (0.48-1.25) | 1.64E-01      |  |
| rs11770935       | 128730247 | G/A       | 0.12 | 0.12    | O/O         | 0.88 (0.68-1.14)                  | 3.38E-01  | 0.93 (0.81-1.07) | 2.99E-01  |       |                       |                  |               |  |

Supplementary Table 7. Association analysis in *IRF5*

| SNP              | BP        | Alleles   |      | MAF     |             | Observed or Imputed in Dataset1/2 | Dataset 1 |                  | Dataset 2 |                | Test of heterogeneity |                  | Meta analysis |  |
|------------------|-----------|-----------|------|---------|-------------|-----------------------------------|-----------|------------------|-----------|----------------|-----------------------|------------------|---------------|--|
|                  |           | maj / min | Case | Control | OR (95% CI) |                                   | P         | OR (95% CI)      | P         | P <sub>Q</sub> | I <sup>2</sup>        | OR (95% CI)      | P             |  |
|                  |           |           |      |         |             |                                   |           |                  |           |                |                       |                  |               |  |
| rs73463022       | 128608211 | A/G       | 0.01 | 0.02    | O/I         | 1.11 (0.60-2.05)                  | 7.49E-01  | 0.67 (0.44-1.03) | 6.59E-02  | 0.19           | 41                    | 0.78 (0.48-1.25) | 1.65E-01      |  |
| rs73463020       | 128607524 | C/T       | 0.01 | 0.02    | O/I         | 1.11 (0.60-2.06)                  | 7.40E-01  | 0.67 (0.44-1.03) | 6.59E-02  | 0.19           | 42                    | 0.78 (0.48-1.25) | 1.67E-01      |  |
| rs6965815        | 128655922 | G/C       | 0.01 | 0.02    | I/I         | 1.13 (0.61-2.10)                  | 6.94E-01  | 0.66 (0.43-1.02) | 6.05E-02  | 0.16           | 48                    | 0.77 (0.48-1.25) | 1.67E-01      |  |
| chr7:128548212:D | 128548212 | AAGAG/A   | 0.16 | 0.17    | I/I         | 0.91 (0.73-1.14)                  | 4.27E-01  | 0.93 (0.82-1.05) | 2.61E-01  | 0.87           | 0                     | 0.93 (0.80-1.08) | 1.70E-01      |  |
| rs188494528      | 128712183 | C/A       | 0.03 | 0.02    | I/I         | 1.22 (0.73-2.06)                  | 4.51E-01  | 1.19 (0.89-1.59) | 2.54E-01  | 0.92           | 0                     | 1.20 (0.84-1.71) | 1.71E-01      |  |
| rs73228783       | 128735988 | C/T       | 0.05 | 0.05    | O/O         | 0.71 (0.49-1.03)                  | 6.96E-02  | 0.95 (0.77-1.17) | 6.35E-01  | 0.17           | 46                    | 0.88 (0.68-1.13) | 1.72E-01      |  |
| rs142449971      | 128680126 | C/T       | 0.01 | 0.02    | I/I         | 1.17 (0.63-2.17)                  | 6.30E-01  | 0.66 (0.42-1.01) | 5.70E-02  | 0.14           | 55                    | 0.77 (0.47-1.26) | 1.75E-01      |  |
| rs79756405       | 128679754 | A/C       | 0.01 | 0.02    | I/I         | 1.17 (0.63-2.17)                  | 6.30E-01  | 0.66 (0.42-1.01) | 5.70E-02  | 0.14           | 55                    | 0.77 (0.47-1.26) | 1.75E-01      |  |
| rs3807300        | 128694091 | T/C       | 0.01 | 0.02    | I/I         | 1.17 (0.63-2.17)                  | 6.30E-01  | 0.66 (0.43-1.02) | 6.06E-02  | 0.14           | 54                    | 0.77 (0.48-1.26) | 1.83E-01      |  |
| rs75709678       | 128550577 | C/T       | 0.15 | 0.16    | I/I         | 0.94 (0.75-1.18)                  | 5.70E-01  | 0.92 (0.81-1.05) | 2.27E-01  | 0.93           | 0                     | 0.93 (0.79-1.08) | 1.85E-01      |  |
| rs113826021      | 128674822 | G/T       | 0.01 | 0.02    | I/I         | 1.13 (0.61-2.10)                  | 6.94E-01  | 0.67 (0.44-1.03) | 7.12E-02  | 0.18           | 45                    | 0.78 (0.48-1.26) | 1.87E-01      |  |
| chr7:128592301:D | 128592301 | GCTCC/G   | 0.48 | 0.49    | I/I         | 0.91 (0.78-1.07)                  | 2.78E-01  | 0.96 (0.88-1.05) | 3.83E-01  | 0.61           | 0                     | 0.95 (0.85-1.06) | 1.88E-01      |  |
| rs6974779        | 128545060 | A/G       | 0.16 | 0.17    | I/I         | 0.91 (0.73-1.14)                  | 4.25E-01  | 0.94 (0.83-1.06) | 2.96E-01  | 0.84           | 0                     | 0.93 (0.80-1.08) | 1.90E-01      |  |
| rs1609545        | 128550894 | G/A       | 0.16 | 0.17    | I/I         | 0.93 (0.74-1.16)                  | 5.04E-01  | 0.93 (0.82-1.05) | 2.67E-01  | 0.96           | 0                     | 0.93 (0.80-1.08) | 1.95E-01      |  |
| rs6975246        | 128545143 | G/A       | 0.16 | 0.17    | I/I         | 0.91 (0.73-1.14)                  | 4.25E-01  | 0.94 (0.83-1.06) | 3.05E-01  | 0.83           | 0                     | 0.93 (0.80-1.08) | 1.96E-01      |  |
| rs6955736        | 128543678 | C/T       | 0.16 | 0.17    | I/I         | 0.91 (0.73-1.14)                  | 4.26E-01  | 0.94 (0.83-1.06) | 3.05E-01  | 0.84           | 0                     | 0.93 (0.80-1.08) | 1.97E-01      |  |
| rs73463017       | 128603690 | A/T       | 0.01 | 0.02    | I/I         | 1.13 (0.61-2.10)                  | 6.94E-01  | 0.68 (0.45-1.04) | 7.64E-02  | 0.19           | 43                    | 0.79 (0.49-1.27) | 1.97E-01      |  |
| rs140709207      | 128598359 | G/A       | 0.02 | 0.02    | I/I         | 1.11 (0.63-1.95)                  | 7.16E-01  | 0.73 (0.51-1.04) | 8.07E-02  | 0.21           | 36                    | 0.82 (0.54-1.24) | 1.99E-01      |  |
| rs73461568       | 128574005 | C/T       | 0.01 | 0.02    | I/I         | 0.92 (0.45-1.86)                  | 8.14E-01  | 0.75 (0.50-1.13) | 1.75E-01  | 0.64           | 0                     | 0.80 (0.49-1.31) | 2.03E-01      |  |
| rs55702815       | 128712925 | T/C       | 0.01 | 0.01    | O/O         | 0.69 (0.32-1.50)                  | 3.52E-01  | 0.83 (0.56-1.24) | 3.65E-01  | 0.67           | 0                     | 0.79 (0.48-1.30) | 2.07E-01      |  |
| rs117298737      | 128624772 | T/C       | 0.03 | 0.03    | I/I         | 1.66 (1.05-2.64)                  | 3.02E-02  | 1.02 (0.78-1.33) | 9.00E-01  | 0.07           | 70                    | 1.17 (0.85-1.61) | 2.08E-01      |  |
| rs11975930       | 128542982 | G/A       | 0.16 | 0.17    | I/I         | 0.91 (0.73-1.14)                  | 4.21E-01  | 0.94 (0.83-1.06) | 3.30E-01  | 0.81           | 0                     | 0.93 (0.80-1.09) | 2.10E-01      |  |
| rs148940572      | 128675068 | C/T       | 0.05 | 0.05    | I/I         | 1.01 (0.70-1.45)                  | 9.74E-01  | 0.85 (0.69-1.05) | 1.42E-01  | 0.45           | 0                     | 0.90 (0.70-1.15) | 2.20E-01      |  |
| rs118058775      | 128592034 | C/T       | 0.03 | 0.03    | I/I         | 1.63 (1.03-2.58)                  | 3.72E-02  | 1.02 (0.78-1.33) | 8.94E-01  | 0.08           | 67                    | 1.16 (0.84-1.60) | 2.22E-01      |  |
| rs148435172      | 128718170 | C/T       | 0.06 | 0.07    | I/I         | 1.17 (0.85-1.60)                  | 3.37E-01  | 0.82 (0.68-1.00) | 4.50E-02  | 0.06           | 71                    | 0.91 (0.72-1.14) | 2.36E-01      |  |
| rs11763959       | 128641906 | G/A       | 0.46 | 0.47    | I/I         | 0.91 (0.78-1.07)                  | 2.76E-01  | 0.97 (0.88-1.06) | 4.79E-01  | 0.55           | 0                     | 0.95 (0.85-1.06) | 2.39E-01      |  |
| rs77729114       | 128729699 | A/C       | 0.01 | 0.02    | I/I         | 0.62 (0.29-1.33)                  | 2.21E-01  | 0.89 (0.61-1.29) | 5.34E-01  | 0.41           | 0                     | 0.80 (0.49-1.31) | 2.39E-01      |  |
| rs6955705        | 128557370 | T/C       | 0.17 | 0.18    | O/O         | 0.99 (0.80-1.23)                  | 9.46E-01  | 0.92 (0.82-1.04) | 1.83E-01  | 0.55           | 0                     | 0.94 (0.81-1.09) | 2.44E-01      |  |
| rs73463067       | 128653785 | G/A       | 0.01 | 0.02    | O/O         | 1.11 (0.60-2.05)                  | 7.47E-01  | 0.72 (0.48-1.08) | 1.15E-01  | 0.25           | 23                    | 0.81 (0.51-1.30) | 2.45E-01      |  |
| rs73238181       | 128542211 | G/A       | 0.01 | 0.01    | I/I         | 1.64 (0.88-3.06)                  | 1.18E-01  | 1.09 (0.69-1.70) | 7.18E-01  | 0.29           | 11                    | 1.22 (0.74-2.00) | 2.55E-01      |  |
| rs8043           | 128607384 | G/A       | 0.48 | 0.50    | O/O         | 0.94 (0.80-1.11)                  | 4.62E-01  | 0.96 (0.88-1.05) | 3.80E-01  | 0.83           | 0                     | 0.95 (0.85-1.07) | 2.57E-01      |  |
| rs117490852      | 128611550 | A/G       | 0.03 | 0.03    | I/I         | 1.63 (1.03-2.58)                  | 3.72E-02  | 1.00 (0.77-1.31) | 9.79E-01  | 0.07           | 69                    | 1.15 (0.83-1.59) | 2.58E-01      |  |
| rs10269317       | 128735579 | C/G       | 0.41 | 0.42    | I/I         | 0.94 (0.80-1.11)                  | 4.73E-01  | 0.96 (0.88-1.05) | 4.07E-01  | 0.82           | 0                     | 0.96 (0.85-1.07) | 2.79E-01      |  |
| rs60857028       | 128647735 | T/C       | 0.01 | 0.02    | O/O         | 1.11 (0.60-2.05)                  | 7.49E-01  | 0.74 (0.49-1.10) | 1.39E-01  | 0.28           | 14                    | 0.83 (0.52-1.31) | 2.79E-01      |  |
| rs73461581       | 128581211 | A/G       | 0.01 | 0.02    | O/I         | 1.16 (0.62-2.15)                  | 6.41E-01  | 0.72 (0.48-1.08) | 1.16E-01  | 0.21           | 36                    | 0.82 (0.52-1.32) | 2.79E-01      |  |
| rs73461582       | 128581330 | T/C       | 0.01 | 0.02    | O/I         | 1.16 (0.62-2.16)                  | 6.38E-01  | 0.72 (0.48-1.08) | 1.16E-01  | 0.21           | 37                    | 0.83 (0.52-1.32) | 2.80E-01      |  |
| rs3857851        | 128592137 | C/T       | 0.49 | 0.50    | I/I         | 0.92 (0.79-1.08)                  | 3.35E-01  | 0.97 (0.89-1.06) | 5.04E-01  | 0.61           | 0                     | 0.96 (0.86-1.07) | 2.81E-01      |  |
| rs17167001       | 128692627 | T/C       | 0.03 | 0.02    | I/I         | 1.15 (0.68-1.96)                  | 5.98E-01  | 1.15 (0.86-1.53) | 3.52E-01  | 0.99           | 0                     | 1.15 (0.80-1.64) | 2.85E-01      |  |
| rs111731993      | 128600342 | T/C       | 0.03 | 0.02    | I/I         | 1.16 (0.68-1.97)                  | 5.89E-01  | 1.15 (0.86-1.53) | 3.60E-01  | 0.97           | 0                     | 1.15 (0.80-1.65) | 2.88E-01      |  |
| rs78939067       | 128600127 | G/T       | 0.03 | 0.02    | I/I         | 1.16 (0.68-1.97)                  | 5.89E-01  | 1.15 (0.86-1.53) | 3.63E-01  | 0.97           | 0                     | 1.15 (0.80-1.64) | 2.90E-01      |  |
| rs185387940      | 128604412 | C/T       | 0.03 | 0.02    | I/I         | 1.16 (0.68-1.97)                  | 5.85E-01  | 1.14 (0.86-1.53) | 3.65E-01  | 0.97           | 0                     | 1.15 (0.80-1.64) | 2.91E-01      |  |
| rs112438598      | 128616001 | A/C       | 0.03 | 0.02    | I/I         | 1.13 (0.67-1.93)                  | 6.41E-01  | 1.15 (0.86-1.54) | 3.43E-01  | 0.96           | 0                     | 1.15 (0.80-1.64) | 2.93E-01      |  |
| rs7788977        | 128624427 | A/T       | 0.03 | 0.02    | I/I         | 1.13 (0.67-1.93)                  | 6.41E-01  | 1.15 (0.86-1.54) | 3.43E-01  | 0.96           | 0                     | 1.15 (0.80-1.64) | 2.93E-01      |  |
| rs1597552        | 128651000 | T/C       | 0.49 | 0.50    | O/O         | 0.93 (0.79-1.09)                  | 3.56E-01  | 0.97 (0.89-1.06) | 5.12E-01  | 0.63           | 0                     | 0.96 (0.86-1.07) | 2.95E-01      |  |
| rs11770589       | 128589488 | G/A       | 0.49 | 0.50    | O/O         | 0.93 (0.79-1.09)                  | 3.46E-01  | 0.97 (0.89-1.06) | 5.31E-01  | 0.61           | 0                     | 0.96 (0.86-1.07) | 3.02E-01      |  |
| rs79495221       | 128647411 | T/C       | 0.03 | 0.02    | I/I         | 1.13 (0.67-1.93)                  | 6.41E-01  | 1.15 (0.86-1.53) | 3.57E-01  | 0.97           | 0                     | 1.14 (0.80-1.64) | 3.04E-01      |  |
| rs76832933       | 128648719 | C/A       | 0.03 | 0.02    | I/I         | 1.13 (0.67-1.93)                  | 6.41E-01  | 1.15 (0.86-1.53) | 3.57E-01  | 0.97           | 0                     | 1.14 (0.80-1.64) | 3.04E-01      |  |
| rs2172876        | 128603292 | G/C       | 0.49 | 0.50    | I/I         | 0.93 (0.79-1.09)                  | 3.64E-01  | 0.97 (0.89-1.06) | 5.21E-01  | 0.64           | 0                     | 0.96 (0.86-1.07) | 3.05E-01      |  |
| rs11766016       | 128697697 | A/C       | 0.03 | 0.02    | I/I         | 1.15 (0.68-1.96)                  | 5.98E-01  | 1.14 (0.85-1.52) | 3.84E-01  | 0.97           | 0                     | 1.14 (0.80-1.63) | 3.09E-01      |  |
| rs6946318        | 128619661 | C/T       | 0.49 | 0.50    | O/O         | 0.93 (0.79-1.09)                  | 3.86E-01  | 0.97 (0.89-1.06) | 5.14E-01  | 0.67           | 0                     | 0.96 (0.86-1.07) | 3.11E-01      |  |
| rs11767834       | 128581276 | C/T       | 0.02 | 0.02    | I/I         | 1.18 (0.69-2.01)                  | 5.39E-01  | 1.13 (0.84-1.53) | 4.20E-01  | 0.89           | 0                     | 1.15 (0.79-1.65) | 3.13E-01      |  |
| rs55908117       | 128549912 | C/G       | 0.14 | 0.15    | I/I         | 0.99 (0.78-1.26)                  | 9.47E-01  | 0.93 (0.81-1.06) | 2.55E-01  | 0.62           | 0                     | 0.94 (0.80-1.11) | 3.17E-01      |  |
| rs117731401      | 128674018 | A/G       | 0.03 | 0.03    | I/I         | 1.66 (1.05-2.63)                  | 3.05E-02  | 0.98 (0.74-1.28) | 8.58E-01  | 0.05           | 74                    | 1.13 (0.82-1.57) | 3.18E-01      |  |
| rs56362836       | 128675454 | C/G       | 0.03 | 0.03    | I/I         | 1.66 (1.05-2.63)                  | 3.05E-02  | 0.98 (0.74-1.28) | 8.58E-01  | 0.05           | 74                    | 1.13 (0.82-1.57) | 3.18E-01      |  |
| chr7:128707922:D | 128707922 | CT/C      | 0.02 | 0.02    | I/I         | 1.38 (0.79-2.38)                  | 2.55E-01  | 0.70 (0.48-1.02) | 6.05E-02  | 0.05           | 75                    | 0.85 (0.56-1.29) | 3.24E-01      |  |
| rs75095369       | 128605103 | T/A       | 0.03 | 0.02    | I/I         | 1.16 (0.68-1.97)                  | 5.89E-01  | 1.13 (0.84-1.51) | 4.11E-01  | 0.94           | 0                     | 1.14 (0.79-1.63) | 3.25E-01      |  |
| rs3896309        | 128654206 | G/C       | 0.49 | 0.50    | I/I         | 0.93 (0.79-1.09)                  | 3.55E-01  | 0.97 (0.89-1.07) | 5.65E-01  | 0.60           | 0                     | 0.96 (0.86-1.07) | 3.27E-01      |  |
| rs6948875        | 128602158 | A/G       | 0.48 | 0.49    | I/I         | 0.94 (0.80-1.11)                  | 4.88E-01  | 0.97 (0.88-1.06) | 4.92E-01  | 0.79           | 0                     | 0.96 (0.86-1.08) | 3.42E-01      |  |
| rs2167273        | 128689413 | C/T       | 0.44 | 0.46    | O/O         | 0.91 (0.78-1.07)                  | 2.58E-01  | 0.98 (0.90-1.07) | 6.85E-01  | 0.43           | 0                     | 0.96 (0.86-1.07) | 3.44E-01      |  |
| rs2305324        | 128641226 | G/C       | 0.45 | 0.46    | I/I         | 0.91 (0.77-1.07)                  | 2.43E-01  | 0.98 (0.90-1.08) | 7.17E-01  | 0.40           | 0                     | 0.96 (0.86-1.07) | 3.53E-01      |  |
| rs76068573       | 128682230 | T/C       | 0.03 | 0.02    | I/I         | 1.13 (0.67-1.93)                  | 6.41E-01  | 1.13 (0.84-1.51) | 4.22E-01  | 0.98           | 0                     | 1.13 (0.79-1.62) | 3.54E-01      |  |
| rs6957206        | 128561455 | C/T       | 0.11 | 0.12    | O/O         | 0.94 (0.73-1.21)                  | 6.29E-01  | 0.94 (0.82-1.09) | 4.33E-01  | 0.97           | 0                     | 0.94 (0.79-1.12) | 3.57E-01      |  |
| rs11766495       | 128701006 | T/G       | 0.03 | 0.02    | O/O         | 1.03 (0.60-1.79)                  | 9.04E-01  | 1.16 (0.87-1.54) | 3.20E-01  | 0.72           | 0                     | 1.12 (0.78-1.61) | 3.64E-01      |  |
| rs147649789      | 128532141 | G/C       | 0.01 | 0.01    | I/I         | 0.67 (0.29-1.52)                  | 3.40E-01  | 0.90 (0.57-1.41) | 6.41E-01  | 0.54           | 0                     | 0.83 (0.48-1.44) | 3.67E-01      |  |
| rs76293322       | 128708337 | C/A       | 0.02 | 0.02    | I/I         | 1.31 (0.76-2.27)                  | 3.26E-01  | 0.73 (0.51-1.05) | 9.40E-02  | 0.08           | 67                    | 0.86 (0.57-1.31) | 3.70E-01      |  |
| rs11770317       | 128629471 | G/C       | 0.49 | 0.50    | I/I         | 0.93 (0.79-1.09)                  | 3.76E-01  | 0.98 (0.89-1.07) | 6.46E-01  | 0.59           | 0                     | 0.97 (0.86-1.08) | 3.90E-01      |  |
| rs79813542       | 128532912 | C/A       | 0.01 | 0.01    | I/I         | 1.56 (0.86-2.82)                  | 1.43E-01  | 1.02 (0.67-1.56) | 9.30E-01  | 0.25           | 23                    | 1.15 (0.72-1.85) | 3.93E-01      |  |
| rs147429183      | 128627343 | C/T       | 0.02 | 0.02    | I/I         | 1.14 (0.67-1.93)                  | 6.34E-01  | 1.11 (0.83-1.50) | 4.81E-01  | 0.94           | 0                     | 1.12 (0.78-1.61) | 3.96E-01      |  |
| chr7:128633053:D | 128633053 | GCTTT/G   | 0.46 | 0.47    | I/I         | 0.93 (0.79-1.09)                  | 3.72E-01  | 0.98 (0.89-1.07) | 6.66E-01  | 0.57           | 0                     | 0.               |               |  |

**Supplementary Table 7.** Association analysis in *IRF5*

| SNP              | BP        | Alleles  |      | MAF     |             | Observed or Imputed in Dataset1/2 | Dataset 1 |                  | Dataset 2 |       | Test of heterogeneity |                  | Meta analysis |  |
|------------------|-----------|----------|------|---------|-------------|-----------------------------------|-----------|------------------|-----------|-------|-----------------------|------------------|---------------|--|
|                  |           | maj/ min | Case | Control | OR (95% CI) |                                   | P         | OR (95% CI)      | P         | $P_Q$ | $I^2$                 | OR (95% CI)      | P             |  |
| rs78516009       | 128712446 | T/C      | 0.01 | 0.01    | I/I         | 0.83 (0.36-1.93)                  | 6.69E-01  | 0.85 (0.54-1.33) | 4.78E-01  | 0.97  | 0                     | 0.85 (0.48-1.48) | 4.07E-01      |  |
| rs35918581       | 128737016 | T/C      | 0.11 | 0.10    | O/O         | 1.06 (0.81-1.38)                  | 6.70E-01  | 1.05 (0.91-1.22) | 4.82E-01  | 0.97  | 0                     | 1.06 (0.88-1.27) | 4.11E-01      |  |
| rs11765050       | 128643240 | G/A      | 0.49 | 0.50    | I/I         | 0.93 (0.79-1.09)                  | 3.55E-01  | 0.98 (0.90-1.08) | 7.00E-01  | 0.54  | 0                     | 0.97 (0.87-1.08) | 4.14E-01      |  |
| rs138457246      | 128655797 | G/A      | 0.02 | 0.02    | I/I         | 1.14 (0.67-1.93)                  | 6.34E-01  | 1.11 (0.82-1.49) | 5.07E-01  | 0.93  | 0                     | 1.11 (0.78-1.60) | 4.15E-01      |  |
| rs73240327       | 128666956 | C/T      | 0.47 | 0.48    | I/I         | 0.92 (0.79-1.08)                  | 3.17E-01  | 0.99 (0.90-1.08) | 7.84E-01  | 0.46  | 0                     | 0.97 (0.87-1.08) | 4.45E-01      |  |
| rs146817911      | 128701364 | T/C      | 0.02 | 0.02    | I/I         | 1.16 (0.68-1.97)                  | 5.85E-01  | 1.08 (0.81-1.46) | 5.90E-01  | 0.83  | 0                     | 1.11 (0.77-1.59) | 4.55E-01      |  |
| rs10269439       | 128735690 | A/G      | 0.30 | 0.31    | O/O         | 0.94 (0.79-1.12)                  | 4.92E-01  | 0.98 (0.89-1.08) | 6.70E-01  | 0.70  | 0                     | 0.97 (0.86-1.09) | 4.68E-01      |  |
| rs55670991       | 128712725 | G/C      | 0.01 | 0.01    | I/I         | 0.87 (0.39-1.92)                  | 7.27E-01  | 0.87 (0.56-1.34) | 5.32E-01  | 1.00  | 0                     | 0.87 (0.51-1.49) | 4.75E-01      |  |
| rs112193169      | 128709098 | G/A      | 0.02 | 0.02    | I/I         | 1.31 (0.76-2.26)                  | 3.31E-01  | 0.77 (0.54-1.10) | 1.47E-01  | 0.11  | 61                    | 0.89 (0.59-1.35) | 4.75E-01      |  |
| rs78987170       | 128739719 | C/T      | 0.10 | 0.10    | I/I         | 1.08 (0.82-1.42)                  | 5.78E-01  | 1.04 (0.89-1.21) | 6.22E-01  | 0.81  | 0                     | 1.05 (0.87-1.26) | 4.75E-01      |  |
| chr7:128558331:D | 128558331 | TCA/T    | 0.17 | 0.17    | I/I         | 1.04 (0.84-1.30)                  | 7.14E-01  | 0.94 (0.83-1.06) | 2.91E-01  | 0.41  | 0                     | 0.96 (0.83-1.12) | 4.81E-01      |  |
| rs59147352       | 128672915 | G/A      | 0.47 | 0.48    | I/I         | 0.92 (0.78-1.08)                  | 3.07E-01  | 0.99 (0.91-1.09) | 8.73E-01  | 0.42  | 0                     | 0.97 (0.87-1.08) | 4.98E-01      |  |
| rs71581979       | 128736841 | G/T      | 0.11 | 0.10    | I/I         | 1.06 (0.81-1.38)                  | 6.93E-01  | 1.04 (0.90-1.21) | 5.89E-01  | 0.93  | 0                     | 1.05 (0.87-1.26) | 5.05E-01      |  |
| rs7795215        | 128710419 | C/T      | 0.02 | 0.02    | I/I         | 1.36 (0.79-2.31)                  | 2.66E-01  | 0.77 (0.54-1.09) | 1.43E-01  | 0.08  | 67                    | 0.90 (0.60-1.35) | 5.16E-01      |  |
| rs139027246      | 128733113 | G/A      | 0.02 | 0.02    | I/I         | 1.80 (1.07-3.04)                  | 2.73E-02  | 0.90 (0.66-1.24) | 5.28E-01  | 0.03  | 80                    | 1.10 (0.75-1.60) | 5.24E-01      |  |
| rs6467227        | 128736327 | A/G      | 0.31 | 0.32    | I/I         | 0.93 (0.78-1.11)                  | 4.36E-01  | 0.99 (0.89-1.09) | 7.95E-01  | 0.58  | 0                     | 0.97 (0.86-1.10) | 5.26E-01      |  |
| rs59929392       | 128735456 | G/A      | 0.31 | 0.31    | O/I         | 0.94 (0.79-1.12)                  | 4.80E-01  | 0.99 (0.89-1.09) | 8.02E-01  | 0.62  | 0                     | 0.97 (0.86-1.10) | 5.56E-01      |  |
| rs116831933      | 128710316 | T/G      | 0.02 | 0.02    | I/I         | 1.38 (0.81-2.36)                  | 2.38E-01  | 0.78 (0.55-1.10) | 1.57E-01  | 0.08  | 68                    | 0.91 (0.61-1.37) | 5.68E-01      |  |
| rs7795065        | 128710330 | C/T      | 0.02 | 0.02    | I/I         | 1.38 (0.81-2.36)                  | 2.38E-01  | 0.78 (0.55-1.10) | 1.58E-01  | 0.08  | 68                    | 0.91 (0.61-1.37) | 5.70E-01      |  |
| rs117158823      | 128545490 | A/G      | 0.02 | 0.02    | I/I         | 1.58 (0.85-2.94)                  | 1.51E-01  | 0.95 (0.66-1.39) | 8.08E-01  | 0.17  | 46                    | 1.10 (0.70-1.72) | 5.77E-01      |  |
| rs143708303      | 128732777 | C/G      | 0.21 | 0.22    | I/I         | 0.87 (0.71-1.06)                  | 1.62E-01  | 1.01 (0.91-1.13) | 8.03E-01  | 0.18  | 45                    | 0.97 (0.85-1.11) | 5.95E-01      |  |
| rs142029795      | 128578392 | G/A      | 0.03 | 0.03    | I/I         | 1.00 (0.61-1.64)                  | 9.99E-01  | 1.09 (0.82-1.47) | 5.43E-01  | 0.75  | 0                     | 1.07 (0.75-1.51) | 6.06E-01      |  |
| rs59526485       | 128732622 | C/T      | 0.22 | 0.22    | I/I         | 0.87 (0.71-1.06)                  | 1.77E-01  | 1.01 (0.91-1.13) | 8.06E-01  | 0.19  | 41                    | 0.97 (0.85-1.11) | 6.11E-01      |  |
| rs142712949      | 128533421 | G/C      | 0.02 | 0.02    | I/I         | 1.34 (0.69-2.56)                  | 3.86E-01  | 1.01 (0.69-1.47) | 9.57E-01  | 0.47  | 0                     | 1.09 (0.69-1.72) | 6.13E-01      |  |
| rs17167079       | 128709171 | C/T      | 0.02 | 0.02    | O/O         | 1.35 (0.81-2.26)                  | 2.54E-01  | 0.80 (0.57-1.13) | 2.04E-01  | 0.10  | 64                    | 0.93 (0.63-1.37) | 6.38E-01      |  |
| rs139749257      | 128565245 | T/C      | 0.03 | 0.03    | I/I         | 0.97 (0.60-1.57)                  | 9.08E-01  | 1.09 (0.82-1.44) | 5.65E-01  | 0.70  | 0                     | 1.05 (0.75-1.48) | 6.70E-01      |  |
| rs10488630       | 128593948 | A/G      | 0.37 | 0.37    | O/O         | 0.88 (0.75-1.05)                  | 1.55E-01  | 1.07 (0.97-1.17) | 1.72E-01  | 0.06  | 72                    | 1.01 (0.90-1.14) | 6.88E-01      |  |
| rs58527765       | 128735048 | G/A      | 0.05 | 0.05    | I/I         | 1.02 (0.70-1.48)                  | 9.21E-01  | 1.04 (0.85-1.27) | 6.90E-01  | 0.92  | 0                     | 1.03 (0.81-1.33) | 6.96E-01      |  |
| rs17424179       | 128657995 | G/A      | 0.03 | 0.04    | O/O         | 1.09 (0.70-1.69)                  | 7.13E-01  | 0.92 (0.71-1.18) | 4.99E-01  | 0.51  | 0                     | 0.96 (0.71-1.31) | 7.06E-01      |  |
| rs62478619       | 128714870 | A/G      | 0.08 | 0.08    | O/O         | 1.25 (0.95-1.64)                  | 1.05E-01  | 0.95 (0.80-1.13) | 5.65E-01  | 0.09  | 65                    | 1.03 (0.84-1.25) | 7.08E-01      |  |
| rs193079748      | 128648408 | C/A      | 0.03 | 0.03    | I/I         | 1.12 (0.68-1.85)                  | 6.48E-01  | 1.01 (0.76-1.36) | 9.23E-01  | 0.73  | 0                     | 1.04 (0.74-1.48) | 7.45E-01      |  |
| rs182717814      | 128598440 | G/A      | 0.01 | 0.02    | I/I         | 1.41 (0.78-2.57)                  | 2.58E-01  | 0.78 (0.51-1.21) | 2.74E-01  | 0.12  | 59                    | 0.93 (0.57-1.50) | 7.51E-01      |  |
| rs140619406      | 128659865 | T/C      | 0.03 | 0.02    | I/I         | 1.03 (0.62-1.73)                  | 8.99E-01  | 1.03 (0.77-1.39) | 8.22E-01  | 1.00  | 0                     | 1.03 (0.72-1.48) | 7.96E-01      |  |
| rs7794772        | 128710210 | A/T      | 0.04 | 0.04    | I/I         | 1.27 (0.87-1.86)                  | 2.22E-01  | 0.95 (0.75-1.19) | 6.36E-01  | 0.20  | 40                    | 1.03 (0.78-1.35) | 8.04E-01      |  |
| rs7800715        | 128704453 | C/G      | 0.35 | 0.35    | I/I         | 0.87 (0.73-1.03)                  | 1.06E-01  | 1.07 (0.97-1.17) | 1.92E-01  | 0.04  | 76                    | 1.01 (0.89-1.13) | 8.08E-01      |  |
| rs79470459       | 128718582 | G/A      | 0.02 | 0.02    | I/I         | 0.95 (0.51-1.76)                  | 8.64E-01  | 1.06 (0.77-1.46) | 7.10E-01  | 0.75  | 0                     | 1.03 (0.69-1.54) | 8.23E-01      |  |
| rs2305323        | 128633722 | T/C      | 0.34 | 0.34    | I/I         | 0.87 (0.73-1.03)                  | 1.17E-01  | 1.06 (0.96-1.16) | 2.64E-01  | 0.06  | 73                    | 1.00 (0.89-1.12) | 9.10E-01      |  |
| chr7:128631031:D | 128631031 | CA/C     | 0.34 | 0.34    | I/I         | 0.87 (0.73-1.03)                  | 1.04E-01  | 1.06 (0.96-1.16) | 2.64E-01  | 0.05  | 74                    | 1.00 (0.89-1.12) | 9.36E-01      |  |
| rs3958094        | 128635267 | G/A      | 0.34 | 0.34    | I/I         | 0.87 (0.73-1.03)                  | 1.02E-01  | 1.05 (0.96-1.16) | 2.70E-01  | 0.05  | 74                    | 1.00 (0.89-1.12) | 9.49E-01      |  |
| rs11773774       | 128638032 | C/T      | 0.34 | 0.34    | I/I         | 0.87 (0.73-1.03)                  | 1.16E-01  | 1.05 (0.96-1.16) | 3.08E-01  | 0.06  | 71                    | 1.00 (0.89-1.12) | 9.77E-01      |  |
| rs1874328        | 128585104 | A/G      | 0.39 | 0.39    | O/O         | 0.90 (0.76-1.06)                  | 2.14E-01  | 1.04 (0.95-1.14) | 4.28E-01  | 0.14  | 54                    | 1.00 (0.89-1.12) | 9.92E-01      |  |

**Supplementary Table 8.** Association analysis in *STAT4*

| SNP              | BP        | Alleles   |      | MAF     |             | Observed or Imputed in Dataset1/2 | Dataset 1 |                  | Dataset 2 |                | Test of heterogeneity |                  | Meta analysis |  |
|------------------|-----------|-----------|------|---------|-------------|-----------------------------------|-----------|------------------|-----------|----------------|-----------------------|------------------|---------------|--|
|                  |           | maj / min | Case | Control | OR (95% CI) |                                   | P         | OR (95% CI)      | P         | P <sub>Q</sub> | I <sup>2</sup>        | OR (95% CI)      | P             |  |
|                  |           |           |      |         |             |                                   |           |                  |           |                |                       |                  |               |  |
| rs10553577       | 191955189 | TATA/T    | 0.30 | 0.23    | I/I         | 1.38 (1.15-1.65)                  | 5.13E-04  | 1.45 (1.31-1.61) | 2.30E-12  | 0.63           | 0                     | 1.43 (1.26-1.62) | 6.80E-15      |  |
| rs4853458        | 191959489 | G/A       | 0.30 | 0.23    | I/I         | 1.41 (1.18-1.69)                  | 1.49E-04  | 1.41 (1.28-1.56) | 2.81E-11  | 0.99           | 0                     | 1.41 (1.25-1.60) | 1.95E-14      |  |
| rs7582694        | 191970120 | G/C       | 0.30 | 0.23    | I/I         | 1.40 (1.17-1.68)                  | 2.14E-04  | 1.40 (1.26-1.55) | 1.33E-10  | 0.97           | 0                     | 1.40 (1.24-1.58) | 1.27E-13      |  |
| rs10181656       | 191969879 | C/G       | 0.30 | 0.23    | I/I         | 1.41 (1.18-1.68)                  | 1.60E-04  | 1.39 (1.26-1.54) | 1.91E-10  | 0.91           | 0                     | 1.40 (1.23-1.58) | 1.36E-13      |  |
| rs7568275        | 191966452 | C/G       | 0.29 | 0.23    | I/I         | 1.41 (1.18-1.68)                  | 1.85E-04  | 1.40 (1.26-1.55) | 1.74E-10  | 0.95           | 0                     | 1.40 (1.24-1.58) | 1.43E-13      |  |
| rs139605600      | 191960109 | A/T       | 0.30 | 0.23    | I/I         | 1.40 (1.18-1.68)                  | 1.73E-04  | 1.38 (1.25-1.53) | 5.39E-10  | 0.86           | 0                     | 1.39 (1.23-1.57) | 4.04E-13      |  |
| rs4853459        | 191962096 | C/T       | 0.30 | 0.23    | I/I         | 1.39 (1.16-1.66)                  | 3.05E-04  | 1.38 (1.24-1.53) | 7.35E-10  | 0.95           | 0                     | 1.38 (1.22-1.56) | 9.64E-13      |  |
| rs12612769       | 191953998 | A/C       | 0.24 | 0.18    | I/I         | 1.39 (1.15-1.69)                  | 6.49E-04  | 1.37 (1.23-1.53) | 2.27E-08  | 0.88           | 0                     | 1.38 (1.21-1.57) | 5.85E-11      |  |
| rs13389408       | 191933283 | T/C       | 0.13 | 0.09    | I/I         | 1.56 (1.23-1.99)                  | 2.80E-04  | 1.40 (1.22-1.62) | 4.51E-06  | 0.46           | 0                     | 1.45 (1.22-1.72) | 6.02E-09      |  |
| rs3024859        | 191925424 | C/T       | 0.24 | 0.19    | I/I         | 1.35 (1.12-1.64)                  | 1.85E-03  | 1.31 (1.17-1.46) | 1.29E-06  | 0.78           | 0                     | 1.32 (1.16-1.51) | 8.68E-09      |  |
| rs13426947       | 191933254 | G/A       | 0.24 | 0.19    | O/O         | 1.34 (1.11-1.62)                  | 2.44E-03  | 1.31 (1.18-1.47) | 1.09E-06  | 0.85           | 0                     | 1.32 (1.16-1.51) | 9.45E-09      |  |
| chr2:191916526:D | 191916526 | AC/A      | 0.24 | 0.19    | I/I         | 1.29 (1.07-1.56)                  | 8.52E-03  | 1.31 (1.17-1.46) | 1.64E-06  | 0.92           | 0                     | 1.30 (1.14-1.49) | 4.81E-08      |  |
| rs12465689       | 191912540 | C/T       | 0.24 | 0.20    | I/I         | 1.32 (1.10-1.60)                  | 3.43E-03  | 1.29 (1.16-1.44) | 4.37E-06  | 0.81           | 0                     | 1.30 (1.14-1.48) | 5.16E-08      |  |
| rs16833214       | 191913642 | A/G       | 0.24 | 0.20    | I/I         | 1.33 (1.10-1.60)                  | 2.97E-03  | 1.29 (1.15-1.44) | 5.69E-06  | 0.77           | 0                     | 1.30 (1.14-1.48) | 5.87E-08      |  |
| rs11893432       | 191921874 | C/G       | 0.24 | 0.20    | I/I         | 1.31 (1.09-1.59)                  | 4.56E-03  | 1.29 (1.16-1.44) | 4.97E-06  | 0.87           | 0                     | 1.30 (1.14-1.48) | 7.65E-08      |  |
| rs79385886       | 191961970 | T/G       | 0.13 | 0.17    | I/I         | 0.77 (0.62-0.97)                  | 2.50E-02  | 0.73 (0.64-0.84) | 3.60E-06  | 0.68           | 0                     | 0.74 (0.64-0.87) | 3.12E-07      |  |
| rs6434435        | 191953864 | G/A       | 0.14 | 0.17    | I/I         | 0.78 (0.62-0.98)                  | 2.96E-02  | 0.74 (0.65-0.84) | 5.82E-06  | 0.67           | 0                     | 0.75 (0.64-0.88) | 5.86E-07      |  |
| chr2:191951361:D | 191951361 | indel/G   | 0.12 | 0.16    | I/I         | 0.77 (0.61-0.96)                  | 2.29E-02  | 0.73 (0.63-0.84) | 7.80E-06  | 0.71           | 0                     | 0.74 (0.63-0.87) | 5.91E-07      |  |
| rs148150767      | 191959933 | T/C       | 0.37 | 0.32    | I/I         | 1.21 (1.03-1.44)                  | 2.34E-02  | 1.24 (1.13-1.37) | 8.28E-06  | 0.81           | 0                     | 1.23 (1.10-1.39) | 6.33E-07      |  |
| rs7601754        | 191940451 | A/G       | 0.14 | 0.18    | O/O         | 0.76 (0.61-0.95)                  | 1.62E-02  | 0.75 (0.66-0.86) | 1.34E-05  | 0.92           | 0                     | 0.76 (0.65-0.88) | 6.87E-07      |  |
| rs10931480       | 191954047 | A/G       | 0.14 | 0.18    | O/I         | 0.77 (0.62-0.96)                  | 1.99E-02  | 0.76 (0.66-0.86) | 2.13E-05  | 0.89           | 0                     | 0.76 (0.65-0.89) | 1.31E-06      |  |
| rs3024912        | 191893087 | A/C       | 0.26 | 0.22    | O/O         | 1.25 (1.04-1.49)                  | 1.46E-02  | 1.24 (1.12-1.38) | 6.13E-05  | 0.96           | 0                     | 1.24 (1.10-1.41) | 2.70E-06      |  |
| rs16833260       | 191971565 | C/G       | 0.37 | 0.33    | I/I         | 1.24 (1.05-1.46)                  | 1.28E-02  | 1.20 (1.09-1.32) | 1.38E-04  | 0.78           | 0                     | 1.21 (1.08-1.36) | 5.33E-06      |  |
| rs7566808        | 191971155 | A/G       | 0.37 | 0.33    | I/I         | 1.23 (1.04-1.46)                  | 1.41E-02  | 1.20 (1.09-1.32) | 2.00E-04  | 0.77           | 0                     | 1.21 (1.08-1.36) | 8.38E-06      |  |
| rs1517351        | 191896045 | T/G       | 0.23 | 0.19    | I/I         | 1.24 (1.03-1.49)                  | 2.39E-02  | 1.22 (1.09-1.36) | 4.75E-04  | 0.88           | 0                     | 1.22 (1.07-1.40) | 3.17E-05      |  |
| rs3024918        | 191891763 | A/G       | 0.15 | 0.18    | O/O         | 0.85 (0.68-1.07)                  | 1.66E-01  | 0.79 (0.70-0.89) | 1.90E-04  | 0.57           | 0                     | 0.81 (0.69-0.94) | 9.77E-05      |  |
| rs3024919        | 191891571 | G/T       | 0.15 | 0.18    | I/I         | 0.83 (0.66-1.04)                  | 1.13E-01  | 0.80 (0.71-0.90) | 3.53E-04  | 0.77           | 0                     | 0.81 (0.69-0.94) | 1.09E-04      |  |
| rs1996400        | 191907527 | C/T       | 0.07 | 0.05    | I/I         | 1.13 (0.78-1.64)                  | 5.16E-01  | 1.48 (1.23-1.79) | 3.29E-05  | 0.20           | 38                    | 1.37 (1.08-1.75) | 1.12E-04      |  |
| rs6749371        | 191902184 | A/T       | 0.04 | 0.06    | I/I         | 0.79 (0.56-1.12)                  | 1.83E-01  | 0.65 (0.52-0.82) | 2.00E-04  | 0.37           | 0                     | 0.69 (0.53-0.89) | 1.16E-04      |  |
| rs3024879        | 191904556 | G/A       | 0.07 | 0.05    | I/I         | 1.12 (0.77-1.63)                  | 5.50E-01  | 1.48 (1.23-1.78) | 3.62E-05  | 0.19           | 41                    | 1.37 (1.08-1.74) | 1.36E-04      |  |
| rs55646736       | 191931960 | G/C       | 0.06 | 0.04    | I/I         | 1.21 (0.83-1.78)                  | 3.20E-01  | 1.46 (1.21-1.77) | 1.10E-04  | 0.39           | 0                     | 1.39 (1.09-1.78) | 1.43E-04      |  |
| rs12693593       | 191964323 | A/C       | 0.07 | 0.09    | I/I         | 0.76 (0.56-1.02)                  | 6.92E-02  | 0.74 (0.62-0.89) | 1.13E-03  | 0.91           | 0                     | 0.75 (0.61-0.92) | 1.97E-04      |  |
| rs3024851        | 191928822 | A/T       | 0.04 | 0.06    | I/I         | 0.76 (0.52-1.11)                  | 1.58E-01  | 0.67 (0.53-0.84) | 5.36E-04  | 0.56           | 0                     | 0.69 (0.53-0.91) | 2.29E-04      |  |
| rs11676659       | 191919354 | A/G       | 0.04 | 0.06    | I/I         | 0.78 (0.54-1.13)                  | 1.92E-01  | 0.66 (0.53-0.83) | 4.25E-04  | 0.47           | 0                     | 0.69 (0.53-0.91) | 2.35E-04      |  |
| rs6715106        | 191913034 | A/G       | 0.04 | 0.06    | O/O         | 0.77 (0.53-1.11)                  | 1.58E-01  | 0.68 (0.54-0.85) | 5.84E-04  | 0.57           | 0                     | 0.70 (0.54-0.91) | 2.49E-04      |  |
| rs3771326        | 191915738 | G/A       | 0.04 | 0.06    | O/I         | 0.78 (0.54-1.14)                  | 1.96E-01  | 0.66 (0.53-0.84) | 4.65E-04  | 0.47           | 0                     | 0.70 (0.53-0.91) | 2.60E-04      |  |
| rs11686127       | 191918031 | C/T       | 0.04 | 0.06    | O/O         | 0.77 (0.53-1.12)                  | 1.79E-01  | 0.68 (0.54-0.85) | 7.19E-04  | 0.55           | 0                     | 0.70 (0.54-0.92) | 3.44E-04      |  |
| rs1400656        | 191935033 | A/G       | 0.04 | 0.06    | I/I         | 0.72 (0.48-1.06)                  | 9.83E-02  | 0.69 (0.55-0.87) | 1.58E-03  | 0.88           | 0                     | 0.70 (0.53-0.92) | 3.78E-04      |  |
| rs13010752       | 191946603 | T/A       | 0.07 | 0.09    | I/I         | 0.80 (0.58-1.09)                  | 1.56E-01  | 0.75 (0.63-0.89) | 1.00E-03  | 0.73           | 0                     | 0.76 (0.61-0.94) | 4.00E-04      |  |
| rs72913147       | 191906581 | A/G       | 0.06 | 0.05    | O/I         | 1.17 (0.81-1.68)                  | 4.19E-01  | 1.42 (1.18-1.72) | 2.56E-04  | 0.35           | 0                     | 1.34 (1.06-1.71) | 4.21E-04      |  |
| rs4853541        | 191920322 | G/A       | 0.04 | 0.06    | I/I         | 0.81 (0.56-1.18)                  | 2.73E-01  | 0.67 (0.54-0.84) | 5.56E-04  | 0.39           | 0                     | 0.71 (0.54-0.93) | 4.53E-04      |  |
| rs1400654        | 191915673 | A/T       | 0.04 | 0.06    | I/I         | 0.81 (0.56-1.17)                  | 2.66E-01  | 0.68 (0.54-0.85) | 6.49E-04  | 0.41           | 0                     | 0.71 (0.55-0.93) | 5.03E-04      |  |
| rs148921410      | 191960409 | C/T       | 0.07 | 0.09    | I/I         | 0.81 (0.59-1.12)                  | 1.99E-01  | 0.74 (0.62-0.89) | 9.96E-04  | 0.64           | 0                     | 0.76 (0.62-0.95) | 5.18E-04      |  |
| rs1818625        | 191923026 | C/T       | 0.28 | 0.26    | I/I         | 1.22 (1.02-1.46)                  | 2.77E-02  | 1.15 (1.04-1.28) | 6.61E-03  | 0.57           | 0                     | 1.17 (1.03-1.33) | 5.18E-04      |  |
| rs7574608        | 191909864 | A/T       | 0.04 | 0.06    | I/I         | 0.77 (0.53-1.12)                  | 1.77E-01  | 0.69 (0.55-0.86) | 1.20E-03  | 0.61           | 0                     | 0.71 (0.54-0.93) | 5.36E-04      |  |
| rs1400655        | 191915715 | C/G       | 0.04 | 0.06    | I/I         | 0.81 (0.56-1.17)                  | 2.69E-01  | 0.68 (0.54-0.85) | 7.29E-04  | 0.42           | 0                     | 0.72 (0.55-0.93) | 5.62E-04      |  |
| rs150250623      | 191962323 | T/G       | 0.07 | 0.08    | I/I         | 0.83 (0.60-1.13)                  | 2.35E-01  | 0.74 (0.62-0.89) | 9.00E-04  | 0.57           | 0                     | 0.77 (0.62-0.95) | 5.74E-04      |  |
| chr2:191956130:D | 191956130 | AG/A      | 0.07 | 0.09    | I/I         | 0.81 (0.59-1.11)                  | 1.93E-01  | 0.75 (0.63-0.89) | 1.28E-03  | 0.67           | 0                     | 0.77 (0.62-0.95) | 6.29E-04      |  |
| rs16833239       | 191940260 | G/A       | 0.06 | 0.08    | I/I         | 0.75 (0.55-1.02)                  | 6.79E-02  | 0.76 (0.63-0.92) | 4.13E-03  | 0.92           | 0                     | 0.76 (0.61-0.95) | 6.74E-04      |  |
| rs3024861        | 191924606 | A/T       | 0.29 | 0.26    | I/I         | 1.23 (1.03-1.47)                  | 2.24E-02  | 1.14 (1.03-1.26) | 1.05E-02  | 0.47           | 0                     | 1.17 (1.03-1.32) | 7.22E-04      |  |
| chr2:191906456:D | 191906456 | AG/A      | 0.08 | 0.10    | I/I         | 0.85 (0.63-1.15)                  | 3.02E-01  | 0.76 (0.64-0.89) | 9.59E-04  | 0.50           | 0                     | 0.78 (0.64-0.96) | 8.18E-04      |  |
| rs11893508       | 191921799 | A/G       | 0.05 | 0.06    | I/I         | 0.83 (0.58-1.18)                  | 3.07E-01  | 0.70 (0.57-0.86) | 9.65E-04  | 0.41           | 0                     | 0.73 (0.57-0.94) | 8.40E-04      |  |
| rs35067237       | 191910743 | C/G       | 0.08 | 0.10    | I/I         | 0.84 (0.62-1.15)                  | 2.78E-01  | 0.76 (0.65-0.90) | 1.15E-03  | 0.56           | 0                     | 0.78 (0.64-0.96) | 8.65E-04      |  |
| rs3024866        | 191922841 | A/G       | 0.29 | 0.26    | O/O         | 1.22 (1.02-1.46)                  | 2.70E-02  | 1.14 (1.03-1.26) | 1.14E-02  | 0.50           | 0                     | 1.16 (1.03-1.32) | 9.01E-04      |  |
| rs66911790       | 191904670 | G/C       | 0.08 | 0.10    | I/I         | 0.87 (0.64-1.17)                  | 3.46E-01  | 0.76 (0.64-0.89) | 9.68E-04  | 0.45           | 0                     | 0.79 (0.64-0.96) | 9.80E-04      |  |
| rs13401064       | 191970330 | C/G       | 0.07 | 0.09    | I/I         | 0.75 (0.56-1.01)                  | 6.28E-02  | 0.78 (0.65-0.93) | 6.76E-03  | 0.84           | 0                     | 0.77 (0.62-0.96) | 1.03E-03      |  |
| rs62179913       | 191892308 | C/T       | 0.06 | 0.08    | O/O         | 0.89 (0.65-1.23)                  | 4.81E-01  | 0.73 (0.61-0.87) | 6.15E-04  | 0.28           | 13                    | 0.77 (0.62-0.96) | 1.05E-03      |  |
| rs12999858       | 191911847 | G/T       | 0.08 | 0.10    | I/O         | 0.85 (0.63-1.15)                  | 3.00E-01  | 0.76 (0.65-0.90) | 1.31E-03  | 0.53           | 0                     | 0.79 (0.64-0.97) | 1.07E-03      |  |
| rs9789710        | 191957413 | G/A       | 0.07 | 0.09    | I/I         | 0.76 (0.56-1.03)                  | 7.45E-02  | 0.78 (0.65-0.93) | 6.14E-03  | 0.90           | 0                     | 0.77 (0.62-0.96) | 1.08E-03      |  |
| rs13390936       | 191954816 | A/T       | 0.07 | 0.09    | I/I         | 0.77 (0.57-1.04)                  | 8.62E-02  | 0.78 (0.65-0.94) | 8.04E-03  | 0.91           | 0                     | 0.78 (0.63-0.97) | 1.59E-03      |  |
| rs16833238       | 191939499 | A/T       | 0.08 | 0.10    | I/I         | 0.84 (0.62-1.13)                  | 2.46E-01  | 0.78 (0.67-0.92) | 3.41E-03  | 0.70           | 0                     | 0.80 (0.65-0.98) | 1.95E-03      |  |
| rs72913168       | 191922355 | C/T       | 0.08 | 0.10    | I/I         | 0.84 (0.62-1.12)                  | 2.34E-01  | 0.79 (0.67-0.92) | 3.62E-03  | 0.72           | 0                     | 0.80 (0.66-0.98) | 1.96E-03      |  |
| rs72913200       | 191952118 | G/A       | 0.05 | 0.04    | I/I         | 1.20 (0.79-1.82)                  | 4.03E-01  | 1.37 (1.11-1.69) | 3.21E-03  | 0.57           | 0                     | 1.32 (1.01-1.73) | 3.28E-03      |  |
| rs3024847        | 191930290 | A/T       | 0.43 | 0.40    | I/I         | 1.15 (0.98-1.36)                  | 8.85E-02  | 1.12 (1.02-1.23) | 1.65E-02  | 0.75           | 0                     | 1.13 (1.01-1.26) | 3.32E-03      |  |
| rs72913198       | 191949632 | G/C       | 0.05 | 0.04    | I/I         | 1.18 (0.78-1.80)                  | 4.37E-01  | 1.37 (1.11-1.69) | 3.21E-03  | 0.53           | 0                     | 1.32 (1.00-1.72) | 3.62E-03      |  |
| rs13017460       | 191932556 | G/A       | 0.43 | 0.40    | O/O         | 1.16 (0.98-1.36)                  | 8.21E-02  | 1.12 (1.02-1.22) | 1.99E-02  | 0.70           | 0                     | 1.13 (1.01-1.26) | 3.78E-03      |  |
| rs11693480       | 191957695 | A/C       | 0.44 | 0.41    | I/I         | 1.12 (0.95-1.32)                  | 1.67E-01  | 1.13 (1.03-1.24) | 1.12E-02  | 0.96           | 0                     | 1.12 (1.01-1.26) | 3.93E-03      |  |
| rs6736175        | 191946322 | T/C       | 0.44 | 0.41    | I/I         | 1.10 (0.94-1.30)                  | 2.32E-01  | 1.13 (1.03-1.24) | 8.01E-03  | 0.79           | 0                     | 1.12 (1.01-1.26) | 3.96E-03      |  |

Supplementary Table 8. Association analysis in *STAT4*

| SNP              | BP        | Alleles   |      | MAF     |             | Observed or Imputed in Dataset1/2 | Dataset 1 |                  | Dataset 2 |                | Test of heterogeneity |                  | Meta analysis |  |
|------------------|-----------|-----------|------|---------|-------------|-----------------------------------|-----------|------------------|-----------|----------------|-----------------------|------------------|---------------|--|
|                  |           | maj / min | Case | Control | OR (95% CI) |                                   | P         | OR (95% CI)      | P         | P <sub>Q</sub> | I <sup>2</sup>        | OR (95% CI)      | P             |  |
|                  |           |           |      |         |             |                                   |           |                  |           |                |                       |                  |               |  |
| rs16833215       | 191913799 | A/G       | 0.33 | 0.30    | O/O         | 1.21 (1.02-1.43)                  | 3.22E-02  | 1.10 (0.99-1.21) | 6.40E-02  | 0.34           | 0                     | 1.13 (1.00-1.27) | 6.78E-03      |  |
| rs12469996       | 191912532 | T/C       | 0.33 | 0.30    | I/I         | 1.20 (1.01-1.43)                  | 3.84E-02  | 1.10 (0.99-1.21) | 6.46E-02  | 0.38           | 0                     | 1.13 (1.00-1.27) | 7.67E-03      |  |
| rs34946552       | 191910563 | A/T       | 0.44 | 0.41    | I/I         | 1.15 (0.97-1.35)                  | 1.00E-01  | 1.10 (1.01-1.21) | 3.65E-02  | 0.68           | 0                     | 1.12 (1.00-1.25) | 8.17E-03      |  |
| rs149218447      | 191963305 | G/A       | 0.04 | 0.03    | I/I         | 1.21 (0.76-1.93)                  | 4.17E-01  | 1.35 (1.07-1.69) | 9.64E-03  | 0.68           | 0                     | 1.31 (0.98-1.75) | 8.69E-03      |  |
| rs72913156       | 191913357 | C/A       | 0.44 | 0.41    | I/I         | 1.15 (0.98-1.36)                  | 9.62E-02  | 1.10 (1.00-1.21) | 4.00E-02  | 0.65           | 0                     | 1.11 (1.00-1.25) | 8.70E-03      |  |
| rs3024877        | 191904889 | C/T       | 0.33 | 0.30    | O/O         | 1.20 (1.01-1.43)                  | 3.41E-02  | 1.09 (0.99-1.20) | 8.97E-02  | 0.31           | 1                     | 1.12 (0.99-1.26) | 1.04E-02      |  |
| rs2459611        | 191939187 | T/C       | 0.09 | 0.10    | O/O         | 0.86 (0.65-1.15)                  | 3.02E-01  | 0.83 (0.71-0.97) | 1.87E-02  | 0.83           | 0                     | 0.84 (0.69-1.02) | 1.11E-02      |  |
| rs4434028        | 191907655 | A/G       | 0.46 | 0.44    | I/I         | 1.16 (0.99-1.37)                  | 7.13E-02  | 1.08 (0.99-1.19) | 9.81E-02  | 0.45           | 0                     | 1.10 (0.99-1.23) | 1.82E-02      |  |
| rs3024904        | 191895202 | T/A       | 0.09 | 0.11    | I/I         | 0.96 (0.73-1.25)                  | 7.46E-01  | 0.82 (0.71-0.96) | 1.24E-02  | 0.34           | 0                     | 0.86 (0.71-1.03) | 2.20E-02      |  |
| rs3024897        | 191896564 | G/C       | 0.09 | 0.11    | I/I         | 0.95 (0.73-1.25)                  | 7.22E-01  | 0.83 (0.71-0.96) | 1.51E-02  | 0.37           | 0                     | 0.86 (0.72-1.04) | 2.45E-02      |  |
| rs3024903        | 191895607 | C/T       | 0.10 | 0.11    | I/I         | 0.96 (0.73-1.25)                  | 7.46E-01  | 0.83 (0.71-0.96) | 1.46E-02  | 0.35           | 0                     | 0.86 (0.72-1.04) | 2.49E-02      |  |
| rs3024908        | 191894141 | T/C       | 0.10 | 0.11    | O/O         | 0.98 (0.75-1.27)                  | 8.66E-01  | 0.83 (0.71-0.96) | 1.37E-02  | 0.28           | 15                    | 0.87 (0.72-1.04) | 2.95E-02      |  |
| rs2464997        | 191940578 | T/G       | 0.04 | 0.03    | I/I         | 1.05 (0.63-1.74)                  | 8.54E-01  | 1.26 (0.99-1.61) | 6.23E-02  | 0.52           | 0                     | 1.20 (0.87-1.65) | 9.35E-02      |  |
| rs925847         | 191897540 | C/T       | 0.28 | 0.27    | O/O         | 1.15 (0.96-1.37)                  | 1.27E-01  | 1.05 (0.95-1.17) | 3.27E-01  | 0.40           | 0                     | 1.08 (0.95-1.22) | 1.00E-01      |  |
| rs4853457        | 191933689 | A/T       | 0.37 | 0.36    | I/I         | 1.13 (0.96-1.34)                  | 1.42E-01  | 1.04 (0.95-1.15) | 3.82E-01  | 0.39           | 0                     | 1.07 (0.95-1.20) | 1.28E-01      |  |
| rs4254532        | 191979178 | A/G       | 0.40 | 0.39    | I/I         | 1.24 (1.05-1.46)                  | 1.08E-02  | 1.00 (0.92-1.10) | 9.09E-01  | 0.03           | 79                    | 1.07 (0.95-1.19) | 1.46E-01      |  |
| chr2:192001749:D | 192001749 | G/GA      | 0.40 | 0.39    | I/I         | 1.21 (1.03-1.43)                  | 2.24E-02  | 1.00 (0.91-1.10) | 9.76E-01  | 0.05           | 75                    | 1.06 (0.94-1.18) | 2.16E-01      |  |
| rs3024936        | 191895376 | G/C       | 0.03 | 0.03    | I/I         | 1.15 (0.74-1.79)                  | 5.34E-01  | 1.15 (0.89-1.49) | 2.95E-01  | 1.00           | 0                     | 1.15 (0.84-1.57) | 2.23E-01      |  |
| rs4583497        | 191990106 | G/C       | 0.39 | 0.37    | I/I         | 1.21 (1.02-1.42)                  | 2.53E-02  | 1.00 (0.91-1.09) | 9.52E-01  | 0.05           | 74                    | 1.05 (0.94-1.18) | 2.54E-01      |  |
| chr2:192001443:D | 192001443 | C/CTCTA   | 0.39 | 0.38    | I/I         | 1.22 (1.04-1.44)                  | 1.73E-02  | 0.99 (0.90-1.09) | 8.63E-01  | 0.03           | 79                    | 1.05 (0.94-1.18) | 2.64E-01      |  |
| rs6709270        | 191994603 | G/A       | 0.38 | 0.37    | I/I         | 1.21 (1.03-1.43)                  | 2.31E-02  | 0.99 (0.91-1.09) | 9.02E-01  | 0.04           | 76                    | 1.05 (0.94-1.18) | 2.70E-01      |  |
| rs4596007        | 191990043 | C/A       | 0.39 | 0.37    | I/I         | 1.21 (1.03-1.43)                  | 2.04E-02  | 0.99 (0.90-1.09) | 8.66E-01  | 0.04           | 77                    | 1.05 (0.94-1.18) | 2.76E-01      |  |
| rs10804037       | 191991891 | A/C       | 0.39 | 0.37    | I/I         | 1.21 (1.03-1.43)                  | 2.18E-02  | 0.99 (0.90-1.09) | 8.76E-01  | 0.04           | 77                    | 1.05 (0.94-1.18) | 2.77E-01      |  |
| rs6712821        | 191995361 | T/C       | 0.39 | 0.37    | O/O         | 1.23 (1.04-1.45)                  | 1.36E-02  | 0.99 (0.90-1.08) | 7.74E-01  | 0.02           | 81                    | 1.05 (0.94-1.18) | 2.86E-01      |  |
| rs7423529        | 192003031 | C/T       | 0.39 | 0.38    | I/I         | 1.21 (1.03-1.43)                  | 2.31E-02  | 0.99 (0.90-1.08) | 8.06E-01  | 0.04           | 77                    | 1.05 (0.93-1.17) | 3.17E-01      |  |
| rs4853545        | 192004445 | T/C       | 0.40 | 0.38    | I/I         | 1.21 (1.02-1.42)                  | 2.80E-02  | 0.99 (0.90-1.09) | 8.37E-01  | 0.04           | 75                    | 1.05 (0.93-1.17) | 3.19E-01      |  |
| rs10197066       | 191985459 | T/G       | 0.38 | 0.37    | I/I         | 1.21 (1.03-1.43)                  | 2.20E-02  | 0.99 (0.90-1.08) | 7.80E-01  | 0.03           | 78                    | 1.05 (0.93-1.17) | 3.26E-01      |  |
| rs62181460       | 192003126 | T/A       | 0.39 | 0.38    | I/I         | 1.21 (1.02-1.43)                  | 2.47E-02  | 0.99 (0.90-1.08) | 7.97E-01  | 0.04           | 77                    | 1.05 (0.93-1.17) | 3.29E-01      |  |
| rs10931482       | 191988629 | C/T       | 0.38 | 0.37    | I/I         | 1.21 (1.03-1.43)                  | 2.04E-02  | 0.99 (0.90-1.08) | 7.60E-01  | 0.03           | 79                    | 1.05 (0.93-1.17) | 3.30E-01      |  |
| rs114724940      | 191973189 | C/T       | 0.01 | 0.01    | I/I         | 1.18 (0.58-2.37)                  | 6.49E-01  | 1.20 (0.79-1.83) | 3.96E-01  | 0.96           | 0                     | 1.19 (0.72-1.97) | 3.36E-01      |  |
| rs4997835        | 191992611 | T/C       | 0.38 | 0.37    | I/I         | 1.21 (1.03-1.43)                  | 2.18E-02  | 0.99 (0.90-1.08) | 7.56E-01  | 0.03           | 78                    | 1.04 (0.93-1.17) | 3.39E-01      |  |
| rs2356349        | 192002158 | G/C       | 0.39 | 0.38    | I/I         | 1.20 (1.02-1.42)                  | 2.80E-02  | 0.99 (0.90-1.08) | 7.93E-01  | 0.04           | 76                    | 1.04 (0.93-1.17) | 3.44E-01      |  |
| rs12995923       | 191994100 | A/G       | 0.38 | 0.37    | I/I         | 1.21 (1.02-1.42)                  | 2.57E-02  | 0.99 (0.90-1.08) | 7.73E-01  | 0.04           | 77                    | 1.04 (0.93-1.17) | 3.46E-01      |  |
| rs6434442        | 192001249 | T/C       | 0.39 | 0.38    | I/I         | 1.21 (1.02-1.42)                  | 2.63E-02  | 0.99 (0.90-1.08) | 7.78E-01  | 0.04           | 77                    | 1.04 (0.93-1.17) | 3.47E-01      |  |
| rs7579720        | 191986673 | T/A       | 0.38 | 0.37    | I/I         | 1.21 (1.02-1.42)                  | 2.48E-02  | 0.99 (0.90-1.08) | 7.64E-01  | 0.04           | 77                    | 1.04 (0.93-1.17) | 3.47E-01      |  |
| rs6715714        | 191992160 | C/T       | 0.38 | 0.37    | I/I         | 1.21 (1.03-1.43)                  | 2.22E-02  | 0.98 (0.90-1.08) | 7.44E-01  | 0.03           | 78                    | 1.04 (0.93-1.17) | 3.48E-01      |  |
| rs1584945        | 191998552 | T/C       | 0.39 | 0.38    | I/I         | 1.21 (1.03-1.43)                  | 2.19E-02  | 0.98 (0.90-1.08) | 7.38E-01  | 0.03           | 79                    | 1.04 (0.93-1.17) | 3.50E-01      |  |
| rs4341967        | 191984286 | T/A       | 0.38 | 0.37    | I/I         | 1.21 (1.02-1.42)                  | 2.48E-02  | 0.99 (0.90-1.08) | 7.59E-01  | 0.04           | 77                    | 1.04 (0.93-1.17) | 3.50E-01      |  |
| rs4853544        | 191991232 | C/G       | 0.38 | 0.37    | I/I         | 1.22 (1.03-1.43)                  | 1.96E-02  | 0.98 (0.90-1.08) | 7.16E-01  | 0.03           | 80                    | 1.04 (0.93-1.17) | 3.50E-01      |  |
| rs4549119        | 191990362 | A/C       | 0.38 | 0.37    | I/I         | 1.21 (1.03-1.43)                  | 2.04E-02  | 0.98 (0.90-1.08) | 7.21E-01  | 0.03           | 79                    | 1.04 (0.93-1.17) | 3.52E-01      |  |
| rs4622765        | 191990645 | T/A       | 0.38 | 0.37    | I/I         | 1.22 (1.03-1.43)                  | 1.96E-02  | 0.98 (0.90-1.08) | 7.11E-01  | 0.03           | 80                    | 1.04 (0.93-1.17) | 3.54E-01      |  |
| rs6434441        | 192000082 | A/G       | 0.39 | 0.38    | I/I         | 1.20 (1.02-1.42)                  | 2.71E-02  | 0.99 (0.90-1.08) | 7.64E-01  | 0.04           | 77                    | 1.04 (0.93-1.17) | 3.58E-01      |  |
| rs4602251        | 191991665 | T/C       | 0.38 | 0.37    | I/I         | 1.22 (1.03-1.43)                  | 1.96E-02  | 0.98 (0.89-1.08) | 7.01E-01  | 0.03           | 80                    | 1.04 (0.93-1.17) | 3.59E-01      |  |
| rs4261749        | 191991642 | C/T       | 0.38 | 0.37    | I/I         | 1.21 (1.03-1.43)                  | 2.08E-02  | 0.98 (0.89-1.08) | 7.00E-01  | 0.03           | 79                    | 1.04 (0.93-1.17) | 3.66E-01      |  |
| rs6434443        | 192001995 | C/G       | 0.39 | 0.38    | I/I         | 1.20 (1.01-1.41)                  | 3.30E-02  | 0.99 (0.90-1.08) | 7.82E-01  | 0.05           | 75                    | 1.04 (0.93-1.17) | 3.68E-01      |  |
| rs2356350        | 192002538 | A/G       | 0.41 | 0.40    | I/I         | 1.20 (1.01-1.41)                  | 3.27E-02  | 0.99 (0.90-1.08) | 7.85E-01  | 0.05           | 75                    | 1.04 (0.93-1.17) | 3.70E-01      |  |
| rs4853542        | 191976602 | G/A       | 0.38 | 0.37    | I/I         | 1.21 (1.02-1.42)                  | 2.64E-02  | 0.98 (0.90-1.08) | 7.36E-01  | 0.04           | 77                    | 1.04 (0.93-1.17) | 3.71E-01      |  |
| rs10193465       | 191975226 | C/T       | 0.38 | 0.37    | I/I         | 1.20 (1.02-1.42)                  | 2.79E-02  | 0.98 (0.90-1.08) | 7.37E-01  | 0.04           | 77                    | 1.04 (0.93-1.17) | 3.78E-01      |  |
| chr2:192000747:D | 192000747 | A/AAC     | 0.39 | 0.38    | I/I         | 1.19 (1.01-1.40)                  | 3.96E-02  | 0.99 (0.90-1.08) | 7.98E-01  | 0.06           | 73                    | 1.04 (0.93-1.17) | 3.81E-01      |  |
| rs1551442        | 191996262 | A/G       | 0.38 | 0.37    | O/O         | 1.20 (1.02-1.41)                  | 3.12E-02  | 0.98 (0.90-1.08) | 7.40E-01  | 0.04           | 76                    | 1.04 (0.93-1.16) | 3.87E-01      |  |
| rs7566274        | 192000919 | A/C       | 0.39 | 0.38    | I/I         | 1.20 (1.02-1.41)                  | 3.20E-02  | 0.98 (0.90-1.08) | 7.43E-01  | 0.04           | 76                    | 1.04 (0.93-1.16) | 3.89E-01      |  |
| rs1020658        | 191996138 | C/G       | 0.38 | 0.37    | I/I         | 1.20 (1.02-1.42)                  | 2.81E-02  | 0.98 (0.89-1.08) | 6.92E-01  | 0.04           | 78                    | 1.04 (0.93-1.16) | 4.05E-01      |  |
| chr2:191995682:I | 191995682 | AG/A      | 0.38 | 0.37    | I/I         | 1.20 (1.02-1.42)                  | 2.67E-02  | 0.98 (0.89-1.07) | 6.57E-01  | 0.03           | 78                    | 1.04 (0.93-1.16) | 4.22E-01      |  |
| rs9967792        | 191974435 | C/T       | 0.38 | 0.37    | I/I         | 1.21 (1.02-1.42)                  | 2.60E-02  | 0.98 (0.89-1.07) | 6.47E-01  | 0.03           | 79                    | 1.04 (0.93-1.16) | 4.28E-01      |  |
| rs1551441        | 191996132 | A/G       | 0.38 | 0.37    | O/I         | 1.18 (1.00-1.39)                  | 4.63E-02  | 0.98 (0.89-1.07) | 6.23E-01  | 0.05           | 74                    | 1.03 (0.92-1.15) | 5.20E-01      |  |
| rs112305041      | 191890120 | T/C       | 0.02 | 0.02    | I/I         | 1.12 (0.69-1.82)                  | 6.44E-01  | 0.82 (0.57-1.20) | 3.12E-01  | 0.33           | 0                     | 0.90 (0.60-1.35) | 5.42E-01      |  |
| rs1551443        | 191996518 | C/T       | 0.38 | 0.37    | O/O         | 1.19 (1.01-1.40)                  | 3.78E-02  | 0.96 (0.88-1.06) | 4.18E-01  | 0.03           | 79                    | 1.02 (0.91-1.15) | 6.73E-01      |  |
| rs34932513       | 191954459 | G/T       | 0.02 | 0.02    | I/I         | 0.71 (0.40-1.28)                  | 2.57E-01  | 1.04 (0.73-1.50) | 8.15E-01  | 0.28           | 15                    | 0.94 (0.61-1.43) | 6.86E-01      |  |
| chr2:191967577:I | 191967577 | C/CTG     | 0.02 | 0.02    | I/I         | 0.74 (0.41-1.32)                  | 3.08E-01  | 1.04 (0.73-1.50) | 8.15E-01  | 0.32           | 0                     | 0.95 (0.62-1.45) | 7.31E-01      |  |
| rs7573832        | 191915208 | A/G       | 0.15 | 0.15    | O/O         | 0.94 (0.74-1.20)                  | 6.30E-01  | 1.00 (0.88-1.13) | 9.65E-01  | 0.68           | 0                     | 0.98 (0.84-1.15) | 7.69E-01      |  |
| rs16833220       | 191917344 | C/G       | 0.14 | 0.14    | I/I         | 0.94 (0.74-1.20)                  | 6.33E-01  | 1.00 (0.88-1.13) | 9.92E-01  | 0.68           | 0                     | 0.98 (0.84-1.15) | 7.93E-01      |  |
| rs16833224       | 191918132 | G/C       | 0.14 | 0.14    | I/I         | 0.94 (0.74-1.20)                  | 6.33E-01  | 1.00 (0.88-1.13) | 9.92E-01  | 0.68           | 0                     | 0.98 (0.84-1.15) | 7.93E-01      |  |
| rs3024865        | 191923543 | G/C       | 0.14 | 0.14    | I/I         | 0.96 (0.75-1.23)                  | 7.45E-01  | 1.00 (0.88-1.13) | 9.57E-01  | 0.79           | 0                     | 0.99 (0.84-1.16) | 8.27E-01      |  |
| rs75356866       | 191982479 | C/T       | 0.01 | 0.01    | I/I         | 0.85 (0.44-1.66)                  | 6.39E-01  | 1.02 (0.68-1.54) | 9.22E-01  | 0.65           | 0                     | 0.97 (0.60-1.57) | 8.70E-01      |  |
| rs3024898        | 191896354 | C/T       | 0.03 | 0.02    | I/I         | 0.56 (0.27-1.15)                  | 1.13E-01  | 1.18 (0.90-1.54) | 2.37E-01  | 0.06           | 72                    | 0.95 (0.64-1.42) | 8.74E-01      |  |
| rs71414919       | 191908557 | G/A       | 0.02 | 0.02    | I/I         | 0.80 (0.45-1.45)                  | 4.68E-01  | 1.06 (0.74-1.53) | 7.30E-01  | 0.42           | 0                     | 0.98 (0.64-1.50) | 9.26E-01      |  |
| chr2:191893880:D | 191893880 | AT/A      | 0.03 | 0.02    | I/I         | 0.55 (0.27-1.12)                  | 9.72E-02  | 1.16 (0.89-1.52) | 2.74E-01  | 0.05           | 73                    | 0.94 (0.63-1.39) | 9.64E-01      |  |

**Supplementary Table 9.** Association analysis in *IL12A*

| SNP              | BP        | Alleles   |      | MAF     |             | Observed or Imputed in Dataset1/2 | Dataset 1 |                  | Dataset 2 |       | Test of heterogeneity |                  | Meta analysis |  |
|------------------|-----------|-----------|------|---------|-------------|-----------------------------------|-----------|------------------|-----------|-------|-----------------------|------------------|---------------|--|
|                  |           | maj / min | Case | Control | OR (95% CI) |                                   | P         | OR (95% CI)      | P         | $P_Q$ | $I^2$                 | OR (95% CI)      | P             |  |
| rs485497         | 159719132 | G/A       | 0.54 | 0.48    | O/O         | 1.32 (1.12-1.55)                  | 9.47E-04  | 1.30 (1.18-1.42) | 3.15E-08  | 0.87  | 0                     | 1.30 (1.16-1.46) | 1.17E-10      |  |
| rs583911         | 159710390 | A/G       | 0.48 | 0.42    | I/I         | 1.29 (1.10-1.52)                  | 2.16E-03  | 1.26 (1.15-1.38) | 1.28E-06  | 0.78  | 0                     | 1.27 (1.13-1.42) | 9.88E-09      |  |
| rs668998         | 159715551 | A/G       | 0.48 | 0.42    | O/O         | 1.30 (1.10-1.53)                  | 1.70E-03  | 1.25 (1.14-1.37) | 2.02E-06  | 0.70  | 0                     | 1.26 (1.13-1.41) | 1.25E-08      |  |
| rs11391651       | 159701545 | CA/C      | 0.48 | 0.42    | I/I         | 1.29 (1.10-1.52)                  | 1.86E-03  | 1.24 (1.13-1.36) | 4.07E-06  | 0.66  | 0                     | 1.26 (1.12-1.41) | 2.74E-08      |  |
| rs582054         | 159710001 | T/A       | 0.48 | 0.42    | I/I         | 1.29 (1.10-1.52)                  | 2.10E-03  | 1.24 (1.13-1.36) | 4.28E-06  | 0.68  | 0                     | 1.25 (1.12-1.40) | 3.23E-08      |  |
| rs582537         | 159710098 | C/A       | 0.48 | 0.42    | I/I         | 1.29 (1.10-1.52)                  | 2.10E-03  | 1.24 (1.13-1.36) | 5.31E-06  | 0.66  | 0                     | 1.25 (1.12-1.40) | 4.00E-08      |  |
| rs647801         | 159707519 | G/A       | 0.48 | 0.43    | I/I         | 1.29 (1.09-1.52)                  | 2.48E-03  | 1.24 (1.13-1.36) | 5.00E-06  | 0.69  | 0                     | 1.25 (1.12-1.40) | 4.38E-08      |  |
| rs4680536        | 159720271 | A/G       | 0.39 | 0.44    | O/O         | 0.76 (0.65-0.89)                  | 8.37E-04  | 0.84 (0.77-0.92) | 2.89E-04  | 0.28  | 14                    | 0.82 (0.73-0.91) | 1.26E-06      |  |
| rs9858816        | 159702290 | T/C       | 0.36 | 0.40    | I/I         | 0.83 (0.70-0.98)                  | 2.90E-02  | 0.81 (0.74-0.89) | 1.67E-05  | 0.80  | 0                     | 0.82 (0.73-0.92) | 1.53E-06      |  |
| rs2243143        | 159714802 | G/A       | 0.36 | 0.40    | O/O         | 0.83 (0.70-0.98)                  | 2.92E-02  | 0.81 (0.74-0.89) | 2.04E-05  | 0.83  | 0                     | 0.82 (0.73-0.92) | 1.86E-06      |  |
| rs2243138        | 159714350 | A/T       | 0.36 | 0.40    | I/I         | 0.83 (0.70-0.98)                  | 2.77E-02  | 0.81 (0.74-0.90) | 2.20E-05  | 0.85  | 0                     | 0.82 (0.73-0.92) | 1.89E-06      |  |
| rs2243149        | 159715712 | C/T       | 0.36 | 0.40    | I/I         | 0.83 (0.70-0.98)                  | 2.64E-02  | 0.82 (0.74-0.90) | 2.34E-05  | 0.88  | 0                     | 0.82 (0.73-0.92) | 1.91E-06      |  |
| rs2243135        | 159712993 | G/C       | 0.36 | 0.40    | I/I         | 0.83 (0.70-0.98)                  | 2.76E-02  | 0.81 (0.74-0.90) | 2.25E-05  | 0.86  | 0                     | 0.82 (0.73-0.92) | 1.93E-06      |  |
| rs11927521       | 159717085 | A/G       | 0.36 | 0.40    | I/I         | 0.83 (0.70-0.98)                  | 2.64E-02  | 0.82 (0.74-0.90) | 2.97E-05  | 0.90  | 0                     | 0.82 (0.73-0.92) | 2.39E-06      |  |
| rs2243147        | 159715386 | A/G       | 0.36 | 0.40    | I/I         | 0.83 (0.70-0.98)                  | 2.54E-02  | 0.82 (0.75-0.90) | 4.58E-05  | 0.95  | 0                     | 0.82 (0.73-0.92) | 3.47E-06      |  |
| chr3:159704703:1 | 159704703 | A/AT      | 0.36 | 0.40    | I/I         | 0.83 (0.70-0.98)                  | 2.82E-02  | 0.82 (0.75-0.91) | 6.30E-05  | 0.93  | 0                     | 0.83 (0.73-0.93) | 5.22E-06      |  |
| chr3:159714095:1 | 159714095 | G/GA      | 0.36 | 0.40    | I/I         | 0.84 (0.71-0.99)                  | 3.75E-02  | 0.82 (0.75-0.90) | 6.19E-05  | 0.86  | 0                     | 0.83 (0.74-0.93) | 6.87E-06      |  |
| rs545232         | 159732031 | C/T       | 0.38 | 0.42    | I/I         | 0.79 (0.67-0.93)                  | 4.21E-03  | 0.84 (0.77-0.93) | 4.59E-04  | 0.48  | 0                     | 0.83 (0.74-0.93) | 7.13E-06      |  |
| rs7615589        | 159707186 | G/A       | 0.26 | 0.29    | I/I         | 0.83 (0.69-0.99)                  | 3.91E-02  | 0.81 (0.73-0.90) | 7.00E-05  | 0.82  | 0                     | 0.81 (0.72-0.92) | 8.01E-06      |  |
| rs2243140        | 159714547 | T/C       | 0.25 | 0.29    | I/I         | 0.82 (0.69-0.99)                  | 3.50E-02  | 0.81 (0.73-0.90) | 8.12E-05  | 0.87  | 0                     | 0.81 (0.72-0.92) | 8.26E-06      |  |
| rs4679867        | 159723903 | T/A       | 0.38 | 0.42    | I/I         | 0.78 (0.67-0.92)                  | 3.20E-03  | 0.85 (0.77-0.93) | 7.40E-04  | 0.39  | 0                     | 0.83 (0.74-0.93) | 9.64E-06      |  |
| rs2243146        | 159715257 | A/G       | 0.25 | 0.29    | I/I         | 0.82 (0.69-0.98)                  | 3.21E-02  | 0.81 (0.73-0.90) | 1.21E-04  | 0.94  | 0                     | 0.82 (0.72-0.93) | 1.11E-05      |  |
| rs62270438       | 159717323 | C/T       | 0.26 | 0.29    | I/I         | 0.82 (0.69-0.99)                  | 3.39E-02  | 0.81 (0.73-0.90) | 1.23E-04  | 0.92  | 0                     | 0.82 (0.72-0.93) | 1.19E-05      |  |
| rs4580600        | 159736391 | A/G       | 0.38 | 0.43    | I/I         | 0.79 (0.67-0.93)                  | 4.60E-03  | 0.85 (0.77-0.93) | 7.12E-04  | 0.44  | 0                     | 0.83 (0.74-0.93) | 1.23E-05      |  |
| chr3:159734192:1 | 159734192 | A/ACTGG   | 0.38 | 0.42    | I/I         | 0.78 (0.67-0.92)                  | 3.22E-03  | 0.86 (0.78-0.94) | 1.09E-03  | 0.36  | 0                     | 0.83 (0.74-0.93) | 1.47E-05      |  |
| chr3:159734187:1 | 159734187 | A/AT      | 0.38 | 0.42    | I/I         | 0.78 (0.67-0.92)                  | 3.18E-03  | 0.86 (0.78-0.94) | 1.25E-03  | 0.34  | 0                     | 0.84 (0.75-0.94) | 1.69E-05      |  |
| rs2243148        | 159715411 | T/C       | 0.26 | 0.29    | I/I         | 0.82 (0.69-0.98)                  | 3.21E-02  | 0.82 (0.74-0.91) | 1.91E-04  | 0.98  | 0                     | 0.82 (0.72-0.93) | 1.72E-05      |  |
| rs10575904       | 159729918 | TATTA/T   | 0.38 | 0.42    | I/I         | 0.79 (0.67-0.93)                  | 5.14E-03  | 0.85 (0.78-0.94) | 9.93E-04  | 0.44  | 0                     | 0.84 (0.75-0.94) | 1.89E-05      |  |
| rs629209         | 159728713 | C/G       | 0.38 | 0.42    | I/I         | 0.79 (0.67-0.93)                  | 4.21E-03  | 0.86 (0.78-0.94) | 1.18E-03  | 0.39  | 0                     | 0.84 (0.75-0.94) | 1.96E-05      |  |
| rs2647931        | 159737076 | G/A       | 0.38 | 0.42    | I/I         | 0.79 (0.67-0.93)                  | 4.11E-03  | 0.86 (0.78-0.94) | 1.25E-03  | 0.38  | 0                     | 0.84 (0.75-0.94) | 2.06E-05      |  |
| rs480913         | 159729580 | T/G       | 0.38 | 0.42    | I/I         | 0.79 (0.67-0.93)                  | 4.21E-03  | 0.86 (0.78-0.94) | 1.28E-03  | 0.38  | 0                     | 0.84 (0.75-0.94) | 2.15E-05      |  |
| rs2936303        | 159730954 | G/A       | 0.38 | 0.42    | I/I         | 0.79 (0.67-0.93)                  | 4.19E-03  | 0.86 (0.78-0.94) | 1.31E-03  | 0.38  | 0                     | 0.84 (0.75-0.94) | 2.18E-05      |  |
| rs6808498        | 159730679 | T/A       | 0.39 | 0.42    | I/I         | 0.79 (0.67-0.93)                  | 4.21E-03  | 0.86 (0.78-0.94) | 1.30E-03  | 0.38  | 0                     | 0.84 (0.75-0.94) | 2.19E-05      |  |
| rs6771363        | 159730682 | A/G       | 0.39 | 0.42    | I/I         | 0.79 (0.67-0.93)                  | 4.21E-03  | 0.86 (0.78-0.94) | 1.30E-03  | 0.38  | 0                     | 0.84 (0.75-0.94) | 2.19E-05      |  |
| rs6808518        | 159730738 | T/A       | 0.39 | 0.42    | I/I         | 0.79 (0.67-0.93)                  | 4.21E-03  | 0.86 (0.78-0.94) | 1.31E-03  | 0.38  | 0                     | 0.84 (0.75-0.94) | 2.19E-05      |  |
| rs586094         | 159729548 | T/G       | 0.38 | 0.42    | I/I         | 0.79 (0.67-0.93)                  | 4.08E-03  | 0.86 (0.78-0.94) | 1.35E-03  | 0.37  | 0                     | 0.84 (0.75-0.94) | 2.22E-05      |  |
| rs2914116        | 159731300 | A/T       | 0.39 | 0.42    | I/I         | 0.79 (0.67-0.93)                  | 4.21E-03  | 0.86 (0.78-0.94) | 1.37E-03  | 0.38  | 0                     | 0.84 (0.75-0.94) | 2.30E-05      |  |
| rs547875         | 159732300 | G/C       | 0.39 | 0.42    | I/I         | 0.79 (0.67-0.93)                  | 4.21E-03  | 0.86 (0.78-0.94) | 1.39E-03  | 0.38  | 0                     | 0.84 (0.75-0.94) | 2.34E-05      |  |
| rs548018         | 159732345 | A/G       | 0.39 | 0.42    | I/I         | 0.79 (0.67-0.93)                  | 4.21E-03  | 0.86 (0.78-0.94) | 1.40E-03  | 0.38  | 0                     | 0.84 (0.75-0.94) | 2.36E-05      |  |
| rs669003         | 159731885 | A/G       | 0.39 | 0.42    | I/I         | 0.79 (0.67-0.93)                  | 4.21E-03  | 0.86 (0.78-0.94) | 1.41E-03  | 0.37  | 0                     | 0.84 (0.75-0.94) | 2.37E-05      |  |
| rs545143         | 159731995 | C/T       | 0.39 | 0.42    | I/I         | 0.79 (0.67-0.93)                  | 4.21E-03  | 0.86 (0.78-0.94) | 1.41E-03  | 0.37  | 0                     | 0.84 (0.75-0.94) | 2.37E-05      |  |
| rs9845010        | 159731532 | A/G       | 0.39 | 0.42    | I/I         | 0.79 (0.67-0.93)                  | 4.21E-03  | 0.86 (0.78-0.94) | 1.41E-03  | 0.37  | 0                     | 0.84 (0.75-0.94) | 2.38E-05      |  |
| rs11716424       | 159734310 | A/G       | 0.38 | 0.42    | I/I         | 0.79 (0.67-0.93)                  | 4.38E-03  | 0.86 (0.78-0.94) | 1.39E-03  | 0.38  | 0                     | 0.84 (0.75-0.94) | 2.42E-05      |  |
| rs1651081        | 159732502 | A/T       | 0.39 | 0.42    | I/I         | 0.79 (0.67-0.93)                  | 4.21E-03  | 0.86 (0.78-0.94) | 1.44E-03  | 0.37  | 0                     | 0.84 (0.75-0.94) | 2.43E-05      |  |
| chr3:159735234:D | 159735234 | CT/C      | 0.39 | 0.43    | I/I         | 0.79 (0.67-0.93)                  | 4.88E-03  | 0.86 (0.78-0.94) | 1.31E-03  | 0.40  | 0                     | 0.84 (0.75-0.94) | 2.47E-05      |  |
| rs589446         | 159733527 | G/T       | 0.38 | 0.42    | I/I         | 0.79 (0.67-0.93)                  | 4.72E-03  | 0.86 (0.78-0.94) | 1.35E-03  | 0.40  | 0                     | 0.84 (0.75-0.94) | 2.48E-05      |  |
| rs9290051        | 159731235 | G/T       | 0.38 | 0.42    | I/I         | 0.79 (0.67-0.93)                  | 4.76E-03  | 0.86 (0.78-0.94) | 1.37E-03  | 0.40  | 0                     | 0.84 (0.75-0.94) | 2.54E-05      |  |
| rs7640862        | 159731221 | G/T       | 0.38 | 0.42    | I/I         | 0.79 (0.67-0.93)                  | 4.76E-03  | 0.86 (0.78-0.94) | 1.41E-03  | 0.40  | 0                     | 0.84 (0.75-0.94) | 2.62E-05      |  |
| chr3:159732808:D | 159732808 | indel/A   | 0.39 | 0.42    | I/I         | 0.79 (0.67-0.93)                  | 4.21E-03  | 0.86 (0.78-0.94) | 1.54E-03  | 0.37  | 0                     | 0.84 (0.75-0.94) | 2.62E-05      |  |
| rs63332460       | 159732840 | C/T       | 0.39 | 0.42    | I/I         | 0.79 (0.67-0.93)                  | 4.21E-03  | 0.86 (0.78-0.94) | 1.54E-03  | 0.37  | 0                     | 0.84 (0.75-0.94) | 2.62E-05      |  |
| rs6441289        | 159732882 | T/C       | 0.39 | 0.42    | I/I         | 0.79 (0.67-0.93)                  | 4.21E-03  | 0.86 (0.78-0.94) | 1.54E-03  | 0.37  | 0                     | 0.84 (0.75-0.94) | 2.62E-05      |  |
| rs6441290        | 159732892 | T/C       | 0.39 | 0.42    | I/I         | 0.79 (0.67-0.93)                  | 4.21E-03  | 0.86 (0.78-0.94) | 1.54E-03  | 0.37  | 0                     | 0.84 (0.75-0.94) | 2.62E-05      |  |
| rs588998         | 159733446 | A/G       | 0.39 | 0.42    | I/I         | 0.79 (0.67-0.93)                  | 4.21E-03  | 0.86 (0.78-0.94) | 1.54E-03  | 0.37  | 0                     | 0.84 (0.75-0.94) | 2.62E-05      |  |
| rs589545         | 159733600 | G/A       | 0.39 | 0.42    | I/I         | 0.79 (0.67-0.93)                  | 4.21E-03  | 0.86 (0.78-0.94) | 1.54E-03  | 0.37  | 0                     | 0.84 (0.75-0.94) | 2.62E-05      |  |
| rs485789         | 159730148 | G/T       | 0.38 | 0.42    | I/I         | 0.79 (0.67-0.93)                  | 4.72E-03  | 0.86 (0.78-0.94) | 1.45E-03  | 0.39  | 0                     | 0.84 (0.75-0.94) | 2.69E-05      |  |
| rs11708713       | 159734286 | G/A       | 0.39 | 0.42    | I/I         | 0.79 (0.67-0.93)                  | 5.29E-03  | 0.86 (0.78-0.94) | 1.36E-03  | 0.41  | 0                     | 0.84 (0.75-0.94) | 2.73E-05      |  |
| rs523886         | 159734858 | G/A       | 0.39 | 0.42    | I/I         | 0.79 (0.67-0.93)                  | 4.11E-03  | 0.86 (0.78-0.94) | 1.63E-03  | 0.36  | 0                     | 0.84 (0.75-0.94) | 2.75E-05      |  |
| rs62270441       | 159737535 | G/T       | 0.39 | 0.42    | I/I         | 0.79 (0.67-0.93)                  | 4.11E-03  | 0.86 (0.78-0.94) | 1.64E-03  | 0.36  | 0                     | 0.84 (0.75-0.94) | 2.77E-05      |  |
| rs491966         | 159733692 | T/C       | 0.39 | 0.42    | I/I         | 0.79 (0.67-0.93)                  | 4.21E-03  | 0.86 (0.78-0.95) | 1.65E-03  | 0.36  | 0                     | 0.84 (0.75-0.94) | 2.82E-05      |  |
| rs11716451       | 159734349 | A/G       | 0.38 | 0.42    | I/I         | 0.79 (0.67-0.93)                  | 4.38E-03  | 0.86 (0.78-0.94) | 1.61E-03  | 0.37  | 0                     | 0.84 (0.75-0.94) | 2.84E-05      |  |
| rs600519         | 159730417 | G/A       | 0.39 | 0.42    | I/I         | 0.79 (0.67-0.93)                  | 4.21E-03  | 0.86 (0.78-0.95) | 1.68E-03  | 0.36  | 0                     | 0.84 (0.75-0.94) | 2.89E-05      |  |
| rs2647930        | 159736893 | T/C       | 0.39 | 0.42    | I/I         | 0.79 (0.67-0.93)                  | 4.11E-03  | 0.86 (0.78-0.95) | 1.71E-03  | 0.36  | 0                     | 0.84 (0.75-0.94) | 2.89E-05      |  |
| rs485499         | 159745863 | T/C       | 0.38 | 0.42    | I/I         | 0.79 (0.67-0.93)                  | 3.97E-03  | 0.86 (0.78-0.95) | 1.86E-03  | 0.35  | 0                     | 0.84 (0.75-0.94) | 3.11E-05      |  |
| rs579079         | 159733428 | C/T       | 0.39 | 0.43    | I/I         | 0.79 (0.67-0.93)                  | 4.21E-03  | 0.86 (0.78-0.95) | 1.81E-03  | 0.36  | 0                     | 0.84 (0.75-0.94) | 3.12E-05      |  |
| rs564799         | 159728987 | C/T       | 0.38 | 0.42    | O/O         | 0.79 (0.67-0.93)                  | 4.46E-03  | 0.86 (0.79-0.95) | 2.12E-03  | 0.36  | 0                     | 0.84 (0.75-0.94) | 3.86E-05      |  |
| chr3:159735125:1 | 159735125 | A/ATT     | 0.38 | 0.42    | I/I         | 0.80 (0.68-0.94)                  | 6.54E-03  | 0.86 (0.78-0.94) | 1.66E-03  | 0.43  | 0                     | 0.84 (0.75-0.94) | 3.98E-05      |  |
| rs2936302        | 159731054 | G/C       | 0.38 | 0.42    | I/I         | 0.80 (0.68-0.94)                  | 6.19E-03  | 0.86 (0.78-0.95) | 1.79E-03  | 0.42  | 0                     | 0.84 (0.75-0.94) | 4.11E-05      |  |
| chr3:159732641:1 | 159732641 | G/GA      | 0.38 | 0.42    | I/I         | 0.80 (0.68-0.94)                  | 6.00E-03  | 0.86 (0.78-0.95) | 1.84E-03  | 0.41  | 0                     | 0.84 (0.75-0.94) | 4.15E-05      |  |
| chr3:159735130:D | 159735130 | TTC/T     | 0.38 | 0.42    | I/I         | 0.78 (0.67-0.93)                  | 3.91E-03  | 0.87 (0.79-0.95) | 2.77E-03  | 0.30  | 5                     | 0.84 (0.75-0.94) | 4.78E-05      |  |
| rs526734         | 159735169 | C/T       | 0.38 | 0.42    | I/I         | 0.81 (0.68-                       |           |                  |           |       |                       |                  |               |  |

Supplementary Table 9. Association analysis in *IL12A*

| SNP              | BP        | Alleles   |      | MAF     |             | Observed or Imputed in Dataset1/2 | Dataset 1 |                  | Dataset 2 |                | Test of heterogeneity |                  | Meta analysis |  |
|------------------|-----------|-----------|------|---------|-------------|-----------------------------------|-----------|------------------|-----------|----------------|-----------------------|------------------|---------------|--|
|                  |           | maj / min | Case | Control | OR (95% CI) |                                   | P         | OR (95% CI)      | P         | P <sub>Q</sub> | I <sup>2</sup>        | OR (95% CI)      | P             |  |
|                  |           |           |      |         |             |                                   |           |                  |           |                |                       |                  |               |  |
| rs9852519        | 159720628 | C/T       | 0.40 | 0.36    | I/I         | 1.16 (0.98-1.37)                  | 8.40E-02  | 1.17 (1.06-1.28) | 1.24E-03  | 0.95           | 0                     | 1.17 (1.04-1.31) | 2.57E-04      |  |
| rs9881959        | 159721847 | T/C       | 0.40 | 0.37    | I/I         | 1.15 (0.97-1.36)                  | 9.99E-02  | 1.16 (1.05-1.27) | 2.37E-03  | 0.95           | 0                     | 1.16 (1.03-1.30) | 5.63E-04      |  |
| rs13065738       | 159720559 | G/T       | 0.39 | 0.36    | I/I         | 1.16 (0.97-1.37)                  | 9.61E-02  | 1.14 (1.04-1.26) | 5.70E-03  | 0.92           | 0                     | 1.15 (1.02-1.29) | 1.25E-03      |  |
| rs2279741        | 159744261 | G/A       | 0.42 | 0.39    | I/I         | 1.12 (0.95-1.32)                  | 1.84E-01  | 1.13 (1.03-1.24) | 9.19E-03  | 0.91           | 0                     | 1.13 (1.01-1.26) | 3.57E-03      |  |
| rs10433458       | 159726252 | C/T       | 0.41 | 0.38    | I/I         | 1.12 (0.95-1.33)                  | 1.66E-01  | 1.13 (1.02-1.24) | 1.35E-02  | 0.97           | 0                     | 1.13 (1.00-1.26) | 4.69E-03      |  |
| rs13096549       | 159742913 | C/A       | 0.41 | 0.38    | I/I         | 1.09 (0.92-1.30)                  | 2.93E-01  | 1.11 (1.01-1.22) | 3.34E-02  | 0.91           | 0                     | 1.10 (0.98-1.24) | 1.82E-02      |  |
| rs2647927        | 159747686 | G/A       | 0.18 | 0.16    | I/I         | 1.26 (1.02-1.55)                  | 3.12E-02  | 1.08 (0.96-1.23) | 2.04E-01  | 0.22           | 32                    | 1.13 (0.98-1.31) | 2.63E-02      |  |
| rs13086832       | 159692282 | T/A       | 0.14 | 0.16    | I/I         | 0.89 (0.71-1.12)                  | 3.19E-01  | 0.88 (0.77-1.00) | 5.70E-02  | 0.92           | 0                     | 0.88 (0.76-1.03) | 3.22E-02      |  |
| rs13064168       | 159692206 | C/A       | 0.14 | 0.16    | I/I         | 0.89 (0.72-1.12)                  | 3.26E-01  | 0.88 (0.78-1.00) | 6.01E-02  | 0.92           | 0                     | 0.89 (0.76-1.04) | 3.45E-02      |  |
| rs2914118        | 159744173 | T/G       | 0.19 | 0.17    | I/I         | 1.24 (1.01-1.52)                  | 3.85E-02  | 1.07 (0.95-1.20) | 2.94E-01  | 0.21           | 36                    | 1.11 (0.96-1.28) | 4.67E-02      |  |
| rs2936298        | 159743883 | G/A       | 0.19 | 0.17    | O/O         | 1.24 (1.01-1.52)                  | 4.00E-02  | 1.06 (0.94-1.20) | 3.11E-01  | 0.21           | 37                    | 1.11 (0.96-1.28) | 5.13E-02      |  |
| rs598638         | 159720817 | G/A       | 0.19 | 0.17    | O/O         | 1.24 (1.01-1.51)                  | 3.79E-02  | 1.06 (0.94-1.20) | 3.35E-01  | 0.20           | 39                    | 1.11 (0.96-1.28) | 5.48E-02      |  |
| rs17826053       | 159717629 | T/G       | 0.13 | 0.15    | I/I         | 0.82 (0.65-1.04)                  | 9.61E-02  | 0.92 (0.80-1.05) | 2.30E-01  | 0.40           | 0                     | 0.89 (0.76-1.05) | 5.72E-02      |  |
| rs640039         | 159713846 | T/C       | 0.13 | 0.15    | I/I         | 0.82 (0.65-1.04)                  | 9.62E-02  | 0.92 (0.81-1.06) | 2.48E-01  | 0.39           | 0                     | 0.89 (0.76-1.05) | 6.26E-02      |  |
| rs2647926        | 159743231 | T/C       | 0.19 | 0.18    | O/O         | 1.24 (1.01-1.51)                  | 3.57E-02  | 1.05 (0.93-1.18) | 4.54E-01  | 0.15           | 51                    | 1.10 (0.95-1.26) | 8.01E-02      |  |
| rs662959         | 159701231 | G/A       | 0.13 | 0.15    | O/O         | 0.84 (0.67-1.06)                  | 1.44E-01  | 0.92 (0.81-1.06) | 2.52E-01  | 0.49           | 0                     | 0.90 (0.76-1.06) | 8.06E-02      |  |
| rs2914119        | 159744438 | T/C       | 0.20 | 0.19    | I/I         | 1.24 (1.02-1.51)                  | 3.37E-02  | 1.04 (0.93-1.17) | 4.78E-01  | 0.14           | 54                    | 1.09 (0.95-1.26) | 8.37E-02      |  |
| rs635602         | 159741829 | G/A       | 0.18 | 0.17    | I/I         | 1.26 (1.02-1.54)                  | 3.08E-02  | 1.04 (0.92-1.18) | 4.93E-01  | 0.13           | 56                    | 1.10 (0.95-1.27) | 8.39E-02      |  |
| rs2936301        | 159744440 | T/C       | 0.20 | 0.19    | I/I         | 1.24 (1.02-1.51)                  | 3.37E-02  | 1.04 (0.93-1.17) | 4.97E-01  | 0.14           | 55                    | 1.09 (0.95-1.26) | 8.84E-02      |  |
| rs2279742        | 159744352 | T/C       | 0.20 | 0.19    | I/I         | 1.24 (1.02-1.51)                  | 3.33E-02  | 1.04 (0.92-1.17) | 5.26E-01  | 0.13           | 56                    | 1.09 (0.95-1.26) | 9.52E-02      |  |
| rs2936300        | 159744277 | T/C       | 0.20 | 0.19    | I/I         | 1.23 (1.01-1.50)                  | 4.11E-02  | 1.04 (0.93-1.17) | 5.04E-01  | 0.16           | 50                    | 1.09 (0.95-1.25) | 9.83E-02      |  |
| rs2936299        | 159744171 | G/A       | 0.20 | 0.19    | I/I         | 1.23 (1.01-1.50)                  | 4.15E-02  | 1.04 (0.93-1.17) | 5.09E-01  | 0.16           | 50                    | 1.09 (0.95-1.25) | 1.00E-01      |  |
| rs9833507        | 159692221 | T/C       | 0.02 | 0.02    | I/I         | 1.27 (0.71-2.29)                  | 4.26E-01  | 1.26 (0.92-1.74) | 1.50E-01  | 0.99           | 0                     | 1.26 (0.85-1.88) | 1.01E-01      |  |
| rs600614         | 159742286 | A/G       | 0.20 | 0.19    | I/I         | 1.23 (1.01-1.49)                  | 4.23E-02  | 1.04 (0.93-1.17) | 5.12E-01  | 0.16           | 50                    | 1.09 (0.95-1.25) | 1.02E-01      |  |
| rs507927         | 159738697 | G/A       | 0.20 | 0.19    | I/I         | 1.23 (1.01-1.50)                  | 4.23E-02  | 1.04 (0.92-1.17) | 5.29E-01  | 0.15           | 51                    | 1.09 (0.95-1.25) | 1.07E-01      |  |
| rs507822         | 159738657 | C/T       | 0.19 | 0.18    | I/I         | 1.24 (1.01-1.51)                  | 3.66E-02  | 1.03 (0.92-1.16) | 5.91E-01  | 0.13           | 57                    | 1.09 (0.94-1.25) | 1.18E-01      |  |
| rs475825         | 159710328 | G/C       | 0.16 | 0.17    | I/I         | 0.86 (0.69-1.08)                  | 1.91E-01  | 0.94 (0.83-1.06) | 3.05E-01  | 0.53           | 0                     | 0.92 (0.79-1.07) | 1.18E-01      |  |
| rs505190         | 159741439 | A/T       | 0.19 | 0.18    | I/I         | 1.24 (1.01-1.51)                  | 3.66E-02  | 1.03 (0.92-1.16) | 5.94E-01  | 0.13           | 57                    | 1.09 (0.94-1.25) | 1.18E-01      |  |
| rs78664442       | 159704806 | C/T       | 0.04 | 0.05    | I/I         | 0.85 (0.59-1.22)                  | 3.69E-01  | 0.86 (0.69-1.09) | 2.14E-01  | 0.92           | 0                     | 0.86 (0.66-1.12) | 1.26E-01      |  |
| rs6778021        | 159739624 | G/C       | 0.20 | 0.19    | I/I         | 1.23 (1.01-1.50)                  | 4.23E-02  | 1.03 (0.92-1.16) | 5.99E-01  | 0.14           | 54                    | 1.08 (0.94-1.25) | 1.28E-01      |  |
| rs638274         | 159741259 | A/C       | 0.20 | 0.19    | I/I         | 1.23 (1.01-1.50)                  | 4.23E-02  | 1.03 (0.92-1.16) | 6.03E-01  | 0.14           | 54                    | 1.08 (0.94-1.25) | 1.29E-01      |  |
| rs6441282        | 159699077 | G/T       | 0.44 | 0.46    | O/O         | 1.00 (0.85-1.18)                  | 9.85E-01  | 0.92 (0.84-1.01) | 8.06E-02  | 0.37           | 0                     | 0.94 (0.84-1.05) | 1.42E-01      |  |
| rs13061089       | 159737430 | G/A       | 0.19 | 0.18    | I/I         | 1.25 (1.02-1.53)                  | 2.94E-02  | 1.02 (0.91-1.15) | 7.26E-01  | 0.09           | 65                    | 1.08 (0.94-1.25) | 1.46E-01      |  |
| rs2243131        | 159712058 | A/G       | 0.16 | 0.17    | I/I         | 0.86 (0.69-1.08)                  | 1.91E-01  | 0.95 (0.83-1.07) | 3.83E-01  | 0.48           | 0                     | 0.92 (0.79-1.07) | 1.52E-01      |  |
| chr3:159727840:D | 159727840 | G/GTCT    | 0.20 | 0.19    | I/I         | 1.22 (1.00-1.48)                  | 5.00E-02  | 1.01 (0.90-1.14) | 8.04E-01  | 0.12           | 59                    | 1.07 (0.93-1.23) | 2.10E-01      |  |
| chr3:159727856:D | 159727856 | T/TTGC    | 0.20 | 0.19    | I/I         | 1.21 (0.99-1.47)                  | 5.84E-02  | 1.01 (0.90-1.14) | 8.02E-01  | 0.14           | 55                    | 1.07 (0.93-1.23) | 2.23E-01      |  |
| rs1651080        | 159727990 | C/T       | 0.19 | 0.19    | I/I         | 1.25 (1.03-1.53)                  | 2.66E-02  | 1.00 (0.89-1.13) | 9.68E-01  | 0.06           | 72                    | 1.07 (0.93-1.23) | 2.25E-01      |  |
| rs2366409        | 159696107 | A/G       | 0.33 | 0.34    | I/I         | 1.01 (0.85-1.19)                  | 9.18E-01  | 0.93 (0.85-1.03) | 1.59E-01  | 0.43           | 0                     | 0.95 (0.85-1.07) | 2.55E-01      |  |
| rs2243141        | 159714559 | C/T       | 0.10 | 0.11    | I/I         | 0.96 (0.75-1.25)                  | 7.85E-01  | 0.92 (0.79-1.06) | 2.42E-01  | 0.73           | 0                     | 0.93 (0.78-1.11) | 2.56E-01      |  |
| rs75978097       | 159745670 | T/A       | 0.01 | 0.01    | I/I         | 1.06 (0.55-2.02)                  | 8.68E-01  | 0.73 (0.48-1.12) | 1.51E-01  | 0.35           | 0                     | 0.81 (0.50-1.32) | 2.59E-01      |  |
| rs60462166       | 159746118 | C/T       | 0.01 | 0.01    | I/I         | 1.06 (0.55-2.02)                  | 8.68E-01  | 0.73 (0.48-1.12) | 1.51E-01  | 0.35           | 0                     | 0.81 (0.50-1.32) | 2.59E-01      |  |
| chr3:159747219:D | 159747219 | ATTG/A    | 0.01 | 0.01    | I/I         | 1.23 (0.61-2.47)                  | 5.70E-01  | 0.65 (0.40-1.07) | 9.27E-02  | 0.15           | 52                    | 0.78 (0.45-1.36) | 2.62E-01      |  |
| rs2243136        | 159713087 | T/C       | 0.11 | 0.11    | I/I         | 0.96 (0.75-1.25)                  | 7.79E-01  | 0.92 (0.80-1.07) | 2.73E-01  | 0.76           | 0                     | 0.93 (0.78-1.12) | 2.82E-01      |  |
| rs78481160       | 159698170 | C/T       | 0.02 | 0.01    | I/I         | 1.14 (0.59-2.23)                  | 6.95E-01  | 1.20 (0.84-1.71) | 3.10E-01  | 0.90           | 0                     | 1.18 (0.76-1.84) | 2.85E-01      |  |
| rs115879932      | 159747372 | A/C       | 0.01 | 0.01    | I/I         | 1.23 (0.61-2.48)                  | 5.63E-01  | 0.66 (0.40-1.09) | 1.05E-01  | 0.16           | 50                    | 0.79 (0.45-1.38) | 2.87E-01      |  |
| rs117030823      | 159747373 | A/C       | 0.01 | 0.01    | I/I         | 1.23 (0.61-2.48)                  | 5.63E-01  | 0.66 (0.40-1.09) | 1.05E-01  | 0.16           | 50                    | 0.79 (0.45-1.38) | 2.87E-01      |  |
| rs9811792        | 159696998 | T/C       | 0.46 | 0.45    | O/O         | 1.04 (0.88-1.22)                  | 6.59E-01  | 1.04 (0.95-1.15) | 3.43E-01  | 0.94           | 0                     | 1.04 (0.93-1.17) | 2.99E-01      |  |
| rs141707000      | 159747610 | T/C       | 0.01 | 0.01    | I/I         | 1.23 (0.61-2.48)                  | 5.63E-01  | 0.67 (0.41-1.10) | 1.16E-01  | 0.17           | 48                    | 0.80 (0.46-1.39) | 3.06E-01      |  |
| rs13322713       | 159717451 | T/C       | 0.10 | 0.11    | I/I         | 0.94 (0.72-1.24)                  | 6.73E-01  | 0.93 (0.81-1.08) | 3.57E-01  | 0.94           | 0                     | 0.94 (0.78-1.12) | 3.15E-01      |  |
| rs35394674       | 159717106 | A/G       | 0.03 | 0.02    | I/I         | 1.12 (0.64-1.96)                  | 6.79E-01  | 1.14 (0.86-1.51) | 3.70E-01  | 0.97           | 0                     | 1.13 (0.79-1.63) | 3.27E-01      |  |
| rs2243115        | 159706280 | T/G       | 0.11 | 0.11    | O/O         | 0.96 (0.75-1.25)                  | 7.84E-01  | 0.93 (0.80-1.08) | 3.29E-01  | 0.81           | 0                     | 0.94 (0.79-1.12) | 3.31E-01      |  |
| rs4608735        | 159717008 | A/C       | 0.11 | 0.11    | I/I         | 0.96 (0.75-1.25)                  | 7.79E-01  | 0.93 (0.81-1.08) | 3.41E-01  | 0.82           | 0                     | 0.94 (0.79-1.12) | 3.40E-01      |  |
| rs890914         | 159701807 | T/C       | 0.11 | 0.11    | I/I         | 0.96 (0.75-1.25)                  | 7.84E-01  | 0.93 (0.80-1.08) | 3.42E-01  | 0.82           | 0                     | 0.94 (0.79-1.12) | 3.42E-01      |  |
| chr3:159746778:I | 159746778 | T/TG      | 0.01 | 0.01    | I/I         | 1.10 (0.55-2.19)                  | 7.95E-01  | 0.75 (0.48-1.17) | 2.05E-01  | 0.37           | 0                     | 0.84 (0.50-1.40) | 3.50E-01      |  |
| rs13319484       | 159702325 | G/A       | 0.11 | 0.11    | I/I         | 0.96 (0.75-1.25)                  | 7.84E-01  | 0.94 (0.81-1.08) | 3.71E-01  | 0.84           | 0                     | 0.94 (0.79-1.13) | 3.67E-01      |  |
| chr3:159744574:D | 159744574 | GC/G      | 0.01 | 0.01    | I/I         | 1.12 (0.58-2.15)                  | 7.39E-01  | 0.76 (0.49-1.17) | 2.10E-01  | 0.33           | 0                     | 0.85 (0.52-1.39) | 3.76E-01      |  |
| chr3:159698698:D | 159698698 | CT/C      | 0.11 | 0.11    | I/I         | 0.95 (0.75-1.22)                  | 7.14E-01  | 0.94 (0.81-1.09) | 4.32E-01  | 0.93           | 0                     | 0.95 (0.79-1.13) | 3.90E-01      |  |
| rs17289236       | 159738134 | G/A       | 0.01 | 0.01    | O/O         | 1.08 (0.58-2.01)                  | 8.18E-01  | 0.78 (0.52-1.19) | 2.51E-01  | 0.41           | 0                     | 0.86 (0.53-1.38) | 3.96E-01      |  |
| rs7653097        | 159690853 | T/C       | 0.10 | 0.10    | O/O         | 1.02 (0.78-1.33)                  | 8.96E-01  | 1.07 (0.92-1.25) | 3.62E-01  | 0.74           | 0                     | 1.06 (0.88-1.27) | 4.00E-01      |  |
| rs678793         | 159700115 | A/G       | 0.10 | 0.11    | I/I         | 0.92 (0.71-1.19)                  | 5.29E-01  | 0.96 (0.82-1.12) | 5.81E-01  | 0.79           | 0                     | 0.95 (0.79-1.14) | 4.23E-01      |  |
| rs2243130        | 159710992 | G/A       | 0.03 | 0.02    | I/I         | 1.12 (0.64-1.96)                  | 6.79E-01  | 1.10 (0.83-1.47) | 4.95E-01  | 0.96           | 0                     | 1.11 (0.77-1.60) | 4.25E-01      |  |
| rs116732492      | 159736462 | G/T       | 0.01 | 0.01    | I/I         | 1.06 (0.55-2.02)                  | 8.67E-01  | 0.80 (0.53-1.22) | 2.99E-01  | 0.48           | 0                     | 0.87 (0.54-1.40) | 4.29E-01      |  |
| chr3:159742706:I | 159742706 | A/AAAC    | 0.01 | 0.01    | I/I         | 1.06 (0.55-2.02)                  | 8.67E-01  | 0.80 (0.53-1.22) | 2.99E-01  | 0.48           | 0                     | 0.87 (0.54-1.40) | 4.29E-01      |  |
| rs16830960       | 159701894 | A/G       | 0.03 | 0.02    | I/I         | 1.12 (0.64-1.96)                  | 6.79E-01  | 1.10 (0.82-1.47) | 5.20E-01  | 0.94           | 0                     | 1.11 (0.77-1.59) | 4.45E-01      |  |
| rs17217081       | 159747098 | A/G       | 0.01 | 0.01    | I/I         | 1.23 (0.61-2.47)                  | 5.70E-01  | 0.75 (0.47-1.18) | 2.10E-01  | 0.24           | 26                    | 0.86 (0.51-1.45) | 4.47E-01      |  |
| rs79227265       | 159723274 | A/G       | 0.01 | 0.01    | I/I         | 1.09 (0.57-2.09)                  | 7.94E-01  | 0.80 (0.53-1.22) | 3.03E-01  | 0.44           | 0                     | 0.88 (0.54-1.42) | 4.63E-01      |  |
| rs2647929        | 159693570 | C/T       | 0.44 | 0.43    | I/I         | 1.02 (0.86-1.20)                  | 8.38E-01  | 1.03 (0.94-1.14) | 4.69E-01  | 0.85           | 0                     | 1.03 (0.92-1.15) | 4.70E-01      |  |
| rs1014486        | 159691112 | T/C       | 0.42 | 0.43    | O/O         | 0.98 (0.84-1.16)                  | 8.36E-01  | 0.97 (0.89-1.06) | 5.24E-01  | 0.89           | 0                     | 0.97 (0.87-1.09) | 5.16E-01      |  |
| rs6800657        | 159699372 | A/G       | 0.11 | 0.12    | I/I         | 0.96 (0.75-1.23)                  | 7.59E-01  | 0.96 (0.83-1.12) | 6.02E-01  | 1.00           | 0                     | 0.96 (0.81-1.15) | 5.4           |  |

**Supplementary Table 9.** Association analysis in *IL12A*

| SNP              | BP        | Alleles   |      | MAF     |             | Observed or Imputed in Dataset1/2 | Dataset 1 |                  | Dataset 2 |       | Test of heterogeneity |                  | Meta analysis |  |
|------------------|-----------|-----------|------|---------|-------------|-----------------------------------|-----------|------------------|-----------|-------|-----------------------|------------------|---------------|--|
|                  |           | maj / min | Case | Control | OR (95% CI) |                                   | P         | OR (95% CI)      | P         | $P_Q$ | $I^2$                 | OR (95% CI)      | P             |  |
|                  |           |           |      |         |             |                                   |           |                  |           |       |                       |                  |               |  |
| rs76199938       | 159743596 | C/A       | 0.01 | 0.02    | 1/1         | 1.06 (0.55-2.02)                  | 8.67E-01  | 0.85 (0.57-1.26) | 4.19E-01  | 0.57  | 0                     | 0.90 (0.57-1.44) | 5.52E-01      |  |
| chr3:159697751:l | 159697751 | G/GT      | 0.18 | 0.18    | 1/1         | 1.13 (0.93-1.38)                  | 2.20E-01  | 0.99 (0.88-1.11) | 8.59E-01  | 0.25  | 24                    | 1.03 (0.89-1.18) | 6.16E-01      |  |
| rs2243126        | 159709825 | G/A       | 0.02 | 0.02    | 1/1         | 1.12 (0.64-1.96)                  | 6.79E-01  | 1.04 (0.77-1.39) | 8.04E-01  | 0.80  | 0                     | 1.06 (0.73-1.53) | 6.67E-01      |  |
| rs532953         | 159690775 | T/C       | 0.11 | 0.12    | 1/1         | 0.98 (0.76-1.25)                  | 8.53E-01  | 0.97 (0.84-1.13) | 7.11E-01  | 0.97  | 0                     | 0.97 (0.82-1.16) | 6.80E-01      |  |
| rs61743970       | 159744609 | C/T       | 0.02 | 0.02    | 1/1         | 1.00 (0.54-1.87)                  | 9.88E-01  | 0.93 (0.66-1.29) | 6.55E-01  | 0.82  | 0                     | 0.95 (0.63-1.43) | 7.10E-01      |  |
| rs747825         | 159699519 | G/T       | 0.18 | 0.18    | 1/1         | 1.11 (0.91-1.36)                  | 3.10E-01  | 0.99 (0.88-1.11) | 8.30E-01  | 0.32  | 0                     | 1.02 (0.89-1.18) | 7.21E-01      |  |
| rs75396248       | 159728630 | G/A       | 0.01 | 0.01    | 1/1         | 1.39 (0.66-2.93)                  | 3.87E-01  | 0.89 (0.58-1.37) | 6.06E-01  | 0.31  | 1                     | 1.01 (0.60-1.70) | 9.82E-01      |  |



**Supplementary Table 10.** Association analysis in *BLK*

| SNP             | BP       | Alleles   |      | MAF     |             | Observed or Imputed in Dataset1/2 | Dataset 1 |                  | Dataset 2 |       | Test of heterogeneity |                  | Meta analysis |  |
|-----------------|----------|-----------|------|---------|-------------|-----------------------------------|-----------|------------------|-----------|-------|-----------------------|------------------|---------------|--|
|                 |          | maj / min | Case | Control | OR (95% CI) |                                   | P         | OR (95% CI)      | P         | $P_Q$ | $I^2$                 | OR (95% CI)      | P             |  |
|                 |          |           |      |         |             |                                   |           |                  |           |       |                       |                  |               |  |
| rs2736345       | 11352485 | A/G       | 0.36 | 0.29    | I/I         | 1.16 (0.97-1.37)                  | 1.01E-01  | 1.37 (1.24-1.50) | 2.76E-10  | 0.10  | 64                    | 1.30 (1.16-1.47) | 4.97E-10      |  |
| rs2729935       | 11389783 | C/A       | 0.41 | 0.35    | I/I         | 1.28 (1.08-1.52)                  | 4.02E-03  | 1.30 (1.19-1.43) | 4.29E-08  | 0.89  | 0                     | 1.30 (1.16-1.46) | 6.85E-10      |  |
| rs7844858       | 11392659 | T/A       | 0.40 | 0.34    | I/I         | 1.26 (1.06-1.49)                  | 8.39E-03  | 1.31 (1.19-1.44) | 2.99E-08  | 0.70  | 0                     | 1.29 (1.15-1.45) | 1.09E-09      |  |
| rs2248696       | 11393803 | T/C       | 0.41 | 0.35    | I/I         | 1.28 (1.08-1.52)                  | 3.90E-03  | 1.29 (1.18-1.42) | 7.63E-08  | 0.94  | 0                     | 1.29 (1.15-1.45) | 1.14E-09      |  |
| rs13277113      | 11349186 | G/A       | 0.30 | 0.25    | O/O         | 1.16 (0.97-1.39)                  | 1.04E-01  | 1.37 (1.24-1.52) | 8.20E-10  | 0.12  | 59                    | 1.31 (1.16-1.48) | 1.31E-09      |  |
| chr8:11389739:D | 11389739 | G/GC      | 0.41 | 0.35    | I/I         | 1.26 (1.06-1.50)                  | 8.43E-03  | 1.30 (1.19-1.43) | 4.09E-08  | 0.73  | 0                     | 1.29 (1.15-1.45) | 1.47E-09      |  |
| rs4840565       | 11345545 | G/C       | 0.33 | 0.27    | I/I         | 1.17 (0.98-1.40)                  | 8.06E-02  | 1.35 (1.23-1.49) | 1.67E-09  | 0.16  | 50                    | 1.30 (1.15-1.47) | 1.58E-09      |  |
| rs922483        | 11351912 | C/T       | 0.34 | 0.28    | O/O         | 1.15 (0.96-1.36)                  | 1.24E-01  | 1.35 (1.23-1.49) | 9.72E-10  | 0.10  | 63                    | 1.29 (1.15-1.45) | 2.01E-09      |  |
| rs2249040       | 11390779 | T/A       | 0.40 | 0.35    | I/I         | 1.27 (1.07-1.51)                  | 5.65E-03  | 1.29 (1.18-1.42) | 9.28E-08  | 0.88  | 0                     | 1.29 (1.15-1.44) | 2.04E-09      |  |
| rs2618435       | 11389980 | G/A       | 0.39 | 0.34    | I/I         | 1.26 (1.06-1.49)                  | 9.28E-03  | 1.30 (1.19-1.43) | 5.25E-08  | 0.71  | 0                     | 1.29 (1.15-1.45) | 2.06E-09      |  |
| rs4840568       | 11351019 | G/A       | 0.32 | 0.26    | I/I         | 1.17 (0.98-1.40)                  | 8.43E-02  | 1.35 (1.23-1.49) | 2.14E-09  | 0.17  | 48                    | 1.30 (1.15-1.47) | 2.08E-09      |  |
| rs9657551       | 11398183 | A/G       | 0.39 | 0.34    | I/I         | 1.25 (1.06-1.49)                  | 9.85E-03  | 1.30 (1.18-1.43) | 5.52E-08  | 0.71  | 0                     | 1.29 (1.15-1.45) | 2.28E-09      |  |
| rs2248700       | 11393745 | A/G       | 0.40 | 0.34    | I/I         | 1.27 (1.07-1.51)                  | 6.57E-03  | 1.29 (1.18-1.42) | 1.04E-07  | 0.86  | 0                     | 1.29 (1.14-1.44) | 2.66E-09      |  |
| rs2618437       | 11389931 | A/G       | 0.40 | 0.35    | I/I         | 1.28 (1.08-1.51)                  | 5.04E-03  | 1.29 (1.17-1.42) | 1.46E-07  | 0.93  | 0                     | 1.28 (1.14-1.44) | 2.77E-09      |  |
| rs2618473       | 11344127 | C/T       | 0.31 | 0.25    | I/I         | 1.18 (0.98-1.41)                  | 7.76E-02  | 1.35 (1.22-1.50) | 3.90E-09  | 0.19  | 41                    | 1.30 (1.15-1.47) | 3.11E-09      |  |
| rs2736340       | 11343973 | C/T       | 0.30 | 0.25    | O/O         | 1.14 (0.95-1.37)                  | 1.45E-01  | 1.36 (1.24-1.51) | 1.26E-09  | 0.10  | 64                    | 1.30 (1.15-1.47) | 3.27E-09      |  |
| rs2409780       | 11337587 | T/C       | 0.30 | 0.24    | I/I         | 1.18 (0.98-1.41)                  | 8.02E-02  | 1.36 (1.22-1.50) | 4.14E-09  | 0.19  | 43                    | 1.30 (1.15-1.47) | 3.36E-09      |  |
| rs2736338       | 11341883 | A/C       | 0.30 | 0.24    | I/I         | 1.17 (0.97-1.40)                  | 9.73E-02  | 1.36 (1.23-1.50) | 3.05E-09  | 0.16  | 49                    | 1.30 (1.15-1.48) | 3.37E-09      |  |
| rs2736337       | 11341880 | T/C       | 0.30 | 0.24    | I/I         | 1.17 (0.97-1.41)                  | 9.31E-02  | 1.36 (1.23-1.50) | 3.34E-09  | 0.17  | 47                    | 1.30 (1.15-1.47) | 3.40E-09      |  |
| rs2618444       | 11338370 | A/C       | 0.30 | 0.24    | I/I         | 1.18 (0.98-1.41)                  | 8.00E-02  | 1.35 (1.22-1.50) | 4.58E-09  | 0.19  | 41                    | 1.30 (1.15-1.47) | 3.64E-09      |  |
| rs2736336       | 11341870 | G/T       | 0.30 | 0.24    | I/I         | 1.16 (0.97-1.40)                  | 1.07E-01  | 1.36 (1.23-1.50) | 2.86E-09  | 0.15  | 53                    | 1.30 (1.15-1.47) | 3.74E-09      |  |
| rs4366049       | 11398504 | A/G       | 0.41 | 0.36    | I/I         | 1.27 (1.07-1.51)                  | 6.03E-03  | 1.28 (1.17-1.41) | 2.73E-07  | 0.94  | 0                     | 1.28 (1.14-1.43) | 6.06E-09      |  |
| rs11250138      | 11323312 | G/C       | 0.33 | 0.28    | I/I         | 1.30 (1.09-1.55)                  | 3.52E-03  | 1.28 (1.16-1.42) | 7.62E-07  | 0.90  | 0                     | 1.29 (1.14-1.46) | 9.48E-09      |  |
| rs34801597      | 11326493 | G/A       | 0.33 | 0.27    | I/I         | 1.28 (1.07-1.53)                  | 7.69E-03  | 1.30 (1.17-1.44) | 3.82E-07  | 0.87  | 0                     | 1.29 (1.14-1.46) | 1.07E-08      |  |
| rs1478897       | 11395232 | A/T       | 0.42 | 0.37    | I/I         | 1.29 (1.09-1.53)                  | 3.09E-03  | 1.26 (1.15-1.39) | 1.10E-06  | 0.80  | 0                     | 1.27 (1.13-1.43) | 1.20E-08      |  |
| rs2729934       | 11389858 | C/G       | 0.42 | 0.36    | I/I         | 1.26 (1.06-1.50)                  | 7.15E-03  | 1.27 (1.16-1.39) | 5.43E-07  | 0.96  | 0                     | 1.27 (1.13-1.42) | 1.40E-08      |  |
| rs11250145      | 11389782 | A/G       | 0.39 | 0.33    | I/I         | 1.22 (1.03-1.45)                  | 2.32E-02  | 1.29 (1.17-1.42) | 1.50E-07  | 0.58  | 0                     | 1.27 (1.13-1.43) | 1.54E-08      |  |
| rs9329246       | 11392880 | T/C       | 0.39 | 0.34    | I/I         | 1.23 (1.04-1.46)                  | 1.76E-02  | 1.29 (1.17-1.42) | 2.21E-07  | 0.67  | 0                     | 1.27 (1.13-1.43) | 1.60E-08      |  |
| chr8:11392728:D | 11392728 | G/GAGAA   | 0.41 | 0.36    | I/I         | 1.26 (1.06-1.50)                  | 7.48E-03  | 1.27 (1.16-1.40) | 7.05E-07  | 0.96  | 0                     | 1.27 (1.13-1.42) | 1.87E-08      |  |
| rs10903339      | 11389784 | A/G       | 0.38 | 0.33    | I/I         | 1.24 (1.04-1.48)                  | 1.64E-02  | 1.29 (1.17-1.42) | 3.04E-07  | 0.70  | 0                     | 1.27 (1.13-1.44) | 1.98E-08      |  |
| rs6998387       | 11293458 | G/A       | 0.37 | 0.32    | O/I         | 1.34 (1.13-1.59)                  | 6.75E-04  | 1.23 (1.12-1.36) | 2.65E-05  | 0.38  | 0                     | 1.26 (1.12-1.42) | 7.96E-08      |  |
| rs11250144      | 11386276 | G/C       | 0.33 | 0.28    | I/I         | 1.12 (0.94-1.34)                  | 1.99E-01  | 1.32 (1.20-1.46) | 3.31E-08  | 0.12  | 59                    | 1.26 (1.12-1.42) | 8.10E-08      |  |
| rs17153419      | 11394233 | A/G       | 0.34 | 0.29    | O/O         | 1.10 (0.92-1.31)                  | 3.01E-01  | 1.32 (1.19-1.45) | 3.31E-08  | 0.08  | 68                    | 1.25 (1.11-1.41) | 1.70E-07      |  |
| rs2003422       | 11303137 | G/C       | 0.37 | 0.32    | I/I         | 1.33 (1.12-1.57)                  | 9.33E-04  | 1.22 (1.11-1.34) | 4.71E-05  | 0.39  | 0                     | 1.25 (1.11-1.40) | 1.92E-07      |  |
| rs3989103       | 11306846 | G/A       | 0.37 | 0.32    | I/I         | 1.35 (1.14-1.60)                  | 6.42E-04  | 1.22 (1.10-1.34) | 6.32E-05  | 0.31  | 5                     | 1.25 (1.11-1.41) | 1.97E-07      |  |
| rs11250136      | 11307469 | G/A       | 0.37 | 0.32    | I/I         | 1.34 (1.13-1.58)                  | 9.09E-04  | 1.22 (1.11-1.34) | 5.63E-05  | 0.36  | 0                     | 1.25 (1.11-1.41) | 2.29E-07      |  |
| rs10088323      | 11300891 | C/G       | 0.49 | 0.44    | I/I         | 1.37 (1.17-1.62)                  | 1.52E-04  | 1.19 (1.08-1.30) | 2.65E-04  | 0.14  | 55                    | 1.24 (1.11-1.39) | 3.38E-07      |  |
| rs55896564      | 11447093 | A/G       | 0.51 | 0.46    | I/I         | 1.25 (1.06-1.47)                  | 6.37E-03  | 1.22 (1.11-1.33) | 2.79E-05  | 0.76  | 0                     | 1.23 (1.10-1.37) | 5.76E-07      |  |
| rs2409781       | 11359557 | T/C       | 0.29 | 0.25    | O/O         | 1.14 (0.96-1.37)                  | 1.44E-01  | 1.30 (1.17-1.44) | 6.31E-07  | 0.24  | 29                    | 1.25 (1.11-1.42) | 5.85E-07      |  |
| rs10097870      | 11444516 | G/A       | 0.50 | 0.46    | O/O         | 1.20 (1.02-1.41)                  | 2.44E-02  | 1.23 (1.12-1.35) | 8.57E-06  | 0.80  | 0                     | 1.22 (1.09-1.37) | 6.83E-07      |  |
| rs2898290       | 11433909 | C/T       | 0.52 | 0.47    | O/O         | 1.29 (1.09-1.51)                  | 2.19E-03  | 1.20 (1.09-1.32) | 9.19E-05  | 0.46  | 0                     | 1.22 (1.09-1.37) | 7.78E-07      |  |
| rs4841564       | 11425809 | T/G       | 0.44 | 0.48    | I/I         | 0.74 (0.63-0.87)                  | 3.01E-04  | 0.85 (0.77-0.93) | 3.68E-04  | 0.16  | 49                    | 0.81 (0.73-0.91) | 7.90E-07      |  |
| rs13270267      | 11444837 | C/T       | 0.50 | 0.45    | I/I         | 1.22 (1.04-1.43)                  | 1.66E-02  | 1.22 (1.12-1.34) | 1.60E-05  | 0.97  | 0                     | 1.22 (1.09-1.37) | 9.29E-07      |  |
| rs9650661       | 11427133 | G/T       | 0.44 | 0.48    | I/I         | 0.74 (0.63-0.88)                  | 3.98E-04  | 0.85 (0.77-0.93) | 3.26E-04  | 0.18  | 44                    | 0.82 (0.73-0.91) | 8.35E-07      |  |
| rs13280813      | 11425105 | G/T       | 0.44 | 0.48    | O/O         | 0.75 (0.64-0.88)                  | 4.77E-04  | 0.85 (0.77-0.93) | 3.21E-04  | 0.20  | 39                    | 0.82 (0.73-0.91) | 9.35E-07      |  |
| rs1382563       | 11426790 | G/C       | 0.44 | 0.48    | I/I         | 0.74 (0.63-0.87)                  | 3.66E-04  | 0.85 (0.77-0.93) | 4.15E-04  | 0.17  | 48                    | 0.82 (0.73-0.91) | 1.04E-06      |  |
| rs7001675       | 11296600 | T/C       | 0.49 | 0.44    | O/O         | 1.30 (1.11-1.53)                  | 1.47E-03  | 1.19 (1.09-1.31) | 1.65E-04  | 0.36  | 0                     | 1.22 (1.09-1.37) | 1.05E-06      |  |
| rs7831039       | 11427637 | A/T       | 0.44 | 0.48    | I/I         | 0.75 (0.63-0.88)                  | 4.64E-04  | 0.85 (0.77-0.93) | 3.69E-04  | 0.19  | 43                    | 0.82 (0.73-0.91) | 1.07E-06      |  |
| rs35161715      | 11308153 | T/G       | 0.35 | 0.30    | I/I         | 1.29 (1.08-1.53)                  | 3.89E-03  | 1.22 (1.10-1.34) | 8.04E-05  | 0.56  | 0                     | 1.24 (1.10-1.39) | 1.09E-06      |  |
| rs2618471       | 11359020 | C/G       | 0.30 | 0.26    | I/I         | 1.14 (0.95-1.37)                  | 1.55E-01  | 1.29 (1.16-1.43) | 1.21E-06  | 0.26  | 22                    | 1.25 (1.10-1.41) | 1.12E-06      |  |
| rs2898281       | 11358521 | C/T       | 0.28 | 0.24    | I/I         | 1.13 (0.94-1.36)                  | 1.95E-01  | 1.30 (1.17-1.44) | 9.06E-07  | 0.20  | 40                    | 1.25 (1.10-1.42) | 1.25E-06      |  |
| chr8:11431558:D | 11431558 | T/TAC     | 0.52 | 0.47    | I/I         | 1.28 (1.09-1.50)                  | 2.87E-03  | 1.20 (1.09-1.31) | 1.20E-04  | 0.48  | 0                     | 1.22 (1.09-1.36) | 1.28E-06      |  |
| rs13256554      | 11432946 | A/C       | 0.52 | 0.47    | I/I         | 1.28 (1.09-1.51)                  | 2.71E-03  | 1.20 (1.09-1.31) | 1.27E-04  | 0.47  | 0                     | 1.22 (1.09-1.36) | 1.29E-06      |  |
| rs11985709      | 11423083 | A/C       | 0.44 | 0.48    | I/I         | 0.75 (0.64-0.88)                  | 4.93E-04  | 0.85 (0.77-0.93) | 4.21E-04  | 0.19  | 42                    | 0.82 (0.73-0.92) | 1.31E-06      |  |
| rs6983820       | 11306024 | A/T       | 0.48 | 0.43    | I/I         | 1.36 (1.15-1.60)                  | 2.41E-04  | 1.17 (1.07-1.29) | 6.82E-04  | 0.13  | 57                    | 1.22 (1.09-1.37) | 1.37E-06      |  |
| rs9792175       | 11307118 | C/A       | 0.48 | 0.43    | I/I         | 1.34 (1.13-1.57)                  | 4.99E-04  | 1.18 (1.08-1.29) | 4.37E-04  | 0.20  | 40                    | 1.22 (1.09-1.37) | 1.38E-06      |  |
| rs4841567       | 11440019 | A/G       | 0.51 | 0.46    | I/I         | 1.26 (1.07-1.49)                  | 4.96E-03  | 1.20 (1.10-1.32) | 8.59E-05  | 0.62  | 0                     | 1.22 (1.09-1.36) | 1.44E-06      |  |
| rs11991139      | 11428395 | C/T       | 0.44 | 0.48    | O/O         | 0.74 (0.63-0.88)                  | 4.11E-04  | 0.85 (0.78-0.93) | 5.32E-04  | 0.16  | 49                    | 0.82 (0.73-0.92) | 1.49E-06      |  |
| rs2409799       | 11435927 | C/G       | 0.51 | 0.47    | I/I         | 1.28 (1.09-1.51)                  | 2.48E-03  | 1.19 (1.09-1.31) | 1.67E-04  | 0.43  | 0                     | 1.22 (1.09-1.36) | 1.61E-06      |  |
| rs2409798       | 11435564 | T/C       | 0.51 | 0.47    | I/I         | 1.28 (1.09-1.50)                  | 2.74E-03  | 1.19 (1.09-1.31) | 1.57E-04  | 0.46  | 0                     | 1.22 (1.09-1.36) | 1.64E-06      |  |
| rs2409775       | 11306805 | A/G       | 0.48 | 0.43    | O/I         | 1.34 (1.14-1.57)                  | 4.52E-04  | 1.18 (1.07-1.29) | 5.98E-04  | 0.18  | 45                    | 1.22 (1.09-1.36) | 1.82E-06      |  |
| rs11990277      | 11372085 | T/C       | 0.29 | 0.25    | I/I         | 1.17 (0.98-1.41)                  | 8.30E-02  | 1.27 (1.15-1.41) | 5.53E-06  | 0.47  | 0                     | 1.24 (1.10-1.41) | 1.83E-06      |  |
| rs2127127       | 11434792 | G/C       | 0.52 | 0.47    | I/I         | 1.28 (1.09-1.50)                  | 2.68E-03  | 1.19 (1.09-1.30) | 1.81E-04  | 0.45  | 0                     | 1.22 (1.09-1.36) | 1.86E-06      |  |
| rs1042701       | 11422045 | G/A       | 0.44 | 0.48    | I/I         | 0.75 (0.63-0.88)                  | 4.73E-04  | 0.85 (0.78-0.93) | 6.02E-04  | 0.17  | 47                    | 0.82 (0.73-0.92) | 1.89E-06      |  |
| rs9792375       | 11302481 | T/G       | 0.46 | 0.42    | I/I         | 1.32 (1.12-1.55)                  | 9.25E-04  | 1.18 (1.08-1.30) | 4.00E-04  | 0.26  | 21                    | 1.22 (1.09-1.36) | 1.93E-06      |  |
| rs7822958       | 11422442 | C/A       | 0.44 | 0.48    | O/I         | 0.75 (0.63-0.88)                  | 4.30E-04  | 0.85 (0.78-0.93) | 6.65E-04  | 0.16  | 50                    | 0.82 (0.73-0.92) | 1.98E-06      |  |
| rs4841546       | 11374107 | C/T       | 0.29 | 0.25    | I/I         | 1.17 (0.97-1.40)                  | 1.00E-01  | 1.27 (1.15-1.41) | 4.60E-06  | 0.41  | 0                     | 1.24 (1.09-1.41) | 1.99E-06      |  |

Supplementary Table 10. Association analysis in *BLK*

| SNP             | BP       | Alleles   |      | MAF     |             | Observed or Imputed in Dataset1/2 | Dataset 1 |                  | Dataset 2 |                | Test of heterogeneity |                  | Meta analysis |  |
|-----------------|----------|-----------|------|---------|-------------|-----------------------------------|-----------|------------------|-----------|----------------|-----------------------|------------------|---------------|--|
|                 |          | maj / min | Case | Control | OR (95% CI) |                                   | P         | OR (95% CI)      | P         | P <sub>Q</sub> | I <sup>2</sup>        | OR (95% CI)      | P             |  |
|                 |          |           |      |         |             |                                   |           |                  |           |                |                       |                  |               |  |
| rs7843987       | 11422130 | T/C       | 0.44 | 0.48    | I/I         | 0.75 (0.63-0.88)                  | 4.67E-04  | 0.85 (0.78-0.93) | 6.40E-04  | 0.17           | 48                    | 0.82 (0.73-0.92) | 2.01E-06      |  |
| rs9792166       | 11306974 | G/C       | 0.34 | 0.30    | I/I         | 1.31 (1.10-1.55)                  | 2.41E-03  | 1.20 (1.09-1.32) | 2.17E-04  | 0.41           | 0                     | 1.23 (1.09-1.39) | 2.08E-06      |  |
| rs1600249       | 11359638 | G/T       | 0.28 | 0.24    | O/I         | 1.13 (0.94-1.36)                  | 1.86E-01  | 1.29 (1.16-1.43) | 1.80E-06  | 0.23           | 32                    | 1.24 (1.09-1.41) | 2.09E-06      |  |
| rs4840560       | 11306444 | G/A       | 0.48 | 0.43    | I/I         | 1.34 (1.14-1.57)                  | 4.63E-04  | 1.17 (1.07-1.29) | 6.75E-04  | 0.17           | 46                    | 1.22 (1.09-1.36) | 2.12E-06      |  |
| rs2409772       | 11306516 | G/A       | 0.48 | 0.43    | I/I         | 1.33 (1.14-1.57)                  | 4.76E-04  | 1.17 (1.07-1.29) | 7.46E-04  | 0.17           | 46                    | 1.22 (1.09-1.36) | 2.43E-06      |  |
| chr8:11297181   | 11297181 | G/GA      | 0.38 | 0.34    | I/I         | 1.30 (1.10-1.53)                  | 2.37E-03  | 1.20 (1.09-1.31) | 2.58E-04  | 0.41           | 0                     | 1.22 (1.09-1.37) | 2.45E-06      |  |
| rs7464263       | 11434176 | T/A       | 0.51 | 0.47    | I/I         | 1.26 (1.07-1.48)                  | 4.53E-03  | 1.19 (1.09-1.31) | 1.59E-04  | 0.54           | 0                     | 1.21 (1.08-1.35) | 2.51E-06      |  |
| rs2248909       | 11392093 | C/A       | 0.53 | 0.48    | I/I         | 1.25 (1.06-1.47)                  | 9.11E-03  | 1.20 (1.09-1.31) | 9.01E-05  | 0.70           | 0                     | 1.21 (1.08-1.36) | 2.57E-06      |  |
| rs35181953      | 11435049 | A/G       | 0.51 | 0.47    | I/I         | 1.28 (1.09-1.50)                  | 2.75E-03  | 1.19 (1.08-1.30) | 2.40E-04  | 0.43           | 0                     | 1.21 (1.08-1.35) | 2.58E-06      |  |
| rs13248746      | 11311838 | T/C       | 0.37 | 0.33    | I/I         | 1.26 (1.06-1.49)                  | 8.24E-03  | 1.21 (1.10-1.33) | 1.04E-04  | 0.70           | 0                     | 1.22 (1.09-1.37) | 2.70E-06      |  |
| rs2409797       | 11433780 | C/T       | 0.51 | 0.46    | I/I         | 1.25 (1.06-1.46)                  | 7.29E-03  | 1.20 (1.09-1.31) | 1.21E-04  | 0.66           | 0                     | 1.21 (1.08-1.35) | 2.85E-06      |  |
| rs2280805       | 11363784 | A/T       | 0.26 | 0.22    | I/I         | 1.11 (0.92-1.34)                  | 2.89E-01  | 1.30 (1.17-1.45) | 1.18E-06  | 0.14           | 54                    | 1.24 (1.09-1.42) | 2.92E-06      |  |
| rs11778830      | 11446868 | C/T       | 0.46 | 0.42    | I/I         | 1.14 (0.97-1.34)                  | 1.05E-01  | 1.23 (1.12-1.35) | 8.63E-06  | 0.42           | 0                     | 1.21 (1.08-1.35) | 3.61E-06      |  |
| rs4841537       | 11307572 | A/G       | 0.48 | 0.43    | I/I         | 1.33 (1.13-1.56)                  | 5.31E-04  | 1.17 (1.06-1.28) | 1.03E-03  | 0.17           | 47                    | 1.21 (1.08-1.36) | 3.79E-06      |  |
| rs11779875      | 11302445 | T/C       | 0.38 | 0.34    | O/I         | 1.27 (1.07-1.49)                  | 4.74E-03  | 1.20 (1.09-1.31) | 2.54E-04  | 0.54           | 0                     | 1.22 (1.08-1.36) | 4.18E-06      |  |
| rs10108511      | 11435516 | C/T       | 0.51 | 0.46    | I/I         | 1.23 (1.04-1.44)                  | 1.24E-02  | 1.20 (1.09-1.31) | 1.19E-04  | 0.78           | 0                     | 1.20 (1.08-1.35) | 4.44E-06      |  |
| rs11785710      | 11311023 | G/A       | 0.49 | 0.44    | I/I         | 1.34 (1.14-1.58)                  | 4.69E-04  | 1.17 (1.06-1.28) | 1.28E-03  | 0.14           | 53                    | 1.21 (1.08-1.36) | 4.55E-06      |  |
| rs4841559       | 11416885 | C/T       | 0.45 | 0.49    | I/I         | 0.75 (0.64-0.89)                  | 7.46E-04  | 0.86 (0.78-0.94) | 9.78E-04  | 0.18           | 45                    | 0.83 (0.74-0.93) | 4.60E-06      |  |
| chr8:11297071:D | 11297071 | GTTCTC/G  | 0.38 | 0.34    | I/I         | 1.27 (1.08-1.50)                  | 4.63E-03  | 1.19 (1.08-1.31) | 3.03E-04  | 0.51           | 0                     | 1.22 (1.08-1.36) | 4.94E-06      |  |
| rs36048422      | 11417144 | T/C       | 0.45 | 0.49    | I/I         | 0.76 (0.64-0.89)                  | 8.08E-04  | 0.86 (0.78-0.94) | 1.04E-03  | 0.18           | 45                    | 0.83 (0.74-0.93) | 5.26E-06      |  |
| rs2409767       | 11303988 | T/C       | 0.46 | 0.41    | I/I         | 1.34 (1.14-1.58)                  | 4.72E-04  | 1.16 (1.06-1.27) | 1.56E-03  | 0.14           | 55                    | 1.21 (1.08-1.35) | 5.72E-06      |  |
| chr8:11417016:D | 11417016 | ACT/A     | 0.45 | 0.49    | I/I         | 0.75 (0.64-0.88)                  | 6.39E-04  | 0.86 (0.79-0.94) | 1.32E-03  | 0.15           | 51                    | 0.83 (0.74-0.93) | 5.79E-06      |  |
| rs34190028      | 11417150 | G/T       | 0.45 | 0.49    | I/I         | 0.76 (0.64-0.89)                  | 9.47E-04  | 0.86 (0.78-0.94) | 1.04E-03  | 0.19           | 41                    | 0.83 (0.74-0.93) | 5.86E-06      |  |
| rs2409774       | 11306764 | C/G       | 0.49 | 0.44    | I/I         | 1.33 (1.13-1.56)                  | 6.36E-04  | 1.16 (1.06-1.27) | 1.35E-03  | 0.16           | 48                    | 1.21 (1.08-1.35) | 5.90E-06      |  |
| rs2248699       | 11393764 | A/G       | 0.46 | 0.50    | I/I         | 0.80 (0.68-0.94)                  | 7.36E-03  | 0.84 (0.77-0.92) | 2.47E-04  | 0.59           | 0                     | 0.83 (0.74-0.93) | 5.92E-06      |  |
| rs4841534       | 11306682 | T/C       | 0.48 | 0.43    | I/I         | 1.33 (1.14-1.57)                  | 4.76E-04  | 1.16 (1.06-1.27) | 1.62E-03  | 0.14           | 53                    | 1.21 (1.08-1.35) | 5.95E-06      |  |
| rs11250151      | 11446680 | C/T       | 0.46 | 0.42    | O/O         | 1.14 (0.97-1.34)                  | 1.12E-01  | 1.23 (1.12-1.35) | 1.38E-05  | 0.43           | 0                     | 1.20 (1.07-1.34) | 5.98E-06      |  |
| rs1478891       | 11448328 | G/C       | 0.39 | 0.34    | I/I         | 1.14 (0.97-1.34)                  | 1.21E-01  | 1.24 (1.12-1.36) | 1.27E-05  | 0.41           | 0                     | 1.21 (1.08-1.35) | 6.15E-06      |  |
| rs2409784       | 11396856 | A/C       | 0.52 | 0.48    | I/I         | 1.22 (1.04-1.44)                  | 1.58E-02  | 1.20 (1.09-1.31) | 1.35E-04  | 0.83           | 0                     | 1.20 (1.08-1.35) | 6.30E-06      |  |
| rs2061830       | 11397457 | G/C       | 0.46 | 0.51    | I/I         | 0.81 (0.69-0.96)                  | 1.20E-02  | 0.84 (0.77-0.92) | 1.77E-04  | 0.74           | 0                     | 0.83 (0.74-0.93) | 6.45E-06      |  |
| rs10105659      | 11256184 | A/G       | 0.52 | 0.48    | O/O         | 1.21 (1.03-1.42)                  | 2.20E-02  | 1.20 (1.10-1.32) | 1.03E-04  | 0.96           | 0                     | 1.20 (1.08-1.35) | 6.55E-06      |  |
| chr8:11416836:D | 11416836 | TCA/T     | 0.44 | 0.48    | I/I         | 0.74 (0.63-0.88)                  | 4.47E-04  | 0.86 (0.79-0.95) | 1.79E-03  | 0.11           | 60                    | 0.83 (0.74-0.93) | 6.64E-06      |  |
| rs2245250       | 11400680 | G/A       | 0.46 | 0.50    | I/I         | 0.80 (0.68-0.95)                  | 8.25E-03  | 0.84 (0.77-0.92) | 2.57E-04  | 0.61           | 0                     | 0.83 (0.74-0.93) | 6.80E-06      |  |
| rs2248325       | 11396874 | A/G       | 0.46 | 0.50    | I/I         | 0.81 (0.68-0.95)                  | 8.80E-03  | 0.84 (0.77-0.92) | 2.62E-04  | 0.62           | 0                     | 0.83 (0.75-0.93) | 7.32E-06      |  |
| rs4841535       | 11306708 | C/T       | 0.48 | 0.43    | I/I         | 1.33 (1.14-1.57)                  | 4.76E-04  | 1.16 (1.05-1.27) | 2.04E-03  | 0.14           | 55                    | 1.21 (1.08-1.35) | 7.72E-06      |  |
| rs10098664      | 11417493 | T/C       | 0.53 | 0.49    | I/I         | 1.29 (1.09-1.52)                  | 2.34E-03  | 1.17 (1.07-1.28) | 7.45E-04  | 0.31           | 3                     | 1.20 (1.08-1.34) | 7.78E-06      |  |
| rs2245232       | 11400944 | G/T       | 0.46 | 0.50    | I/I         | 0.80 (0.68-0.95)                  | 8.53E-03  | 0.84 (0.77-0.92) | 2.86E-04  | 0.61           | 0                     | 0.83 (0.74-0.93) | 7.80E-06      |  |
| rs11250150      | 11446637 | A/G       | 0.46 | 0.42    | I/I         | 1.14 (0.97-1.34)                  | 1.07E-01  | 1.22 (1.11-1.34) | 2.09E-05  | 0.48           | 0                     | 1.20 (1.07-1.34) | 8.08E-06      |  |
| rs12386974      | 11400628 | G/C       | 0.46 | 0.51    | I/I         | 0.81 (0.69-0.96)                  | 1.19E-02  | 0.84 (0.77-0.92) | 2.31E-04  | 0.70           | 0                     | 0.83 (0.75-0.93) | 8.34E-06      |  |
| rs2245357       | 11399484 | A/T       | 0.46 | 0.50    | I/I         | 0.80 (0.68-0.95)                  | 8.28E-03  | 0.85 (0.77-0.93) | 3.16E-04  | 0.59           | 0                     | 0.83 (0.75-0.93) | 8.41E-06      |  |
| rs2248315       | 11397086 | T/A       | 0.46 | 0.50    | I/I         | 0.81 (0.69-0.95)                  | 1.05E-02  | 0.84 (0.77-0.92) | 2.60E-04  | 0.66           | 0                     | 0.83 (0.75-0.93) | 8.44E-06      |  |
| rs10097252      | 11273560 | G/C       | 0.52 | 0.48    | I/I         | 1.26 (1.07-1.49)                  | 4.77E-03  | 1.18 (1.07-1.29) | 4.94E-04  | 0.46           | 0                     | 1.20 (1.07-1.34) | 8.61E-06      |  |
| rs2409771       | 11304143 | A/G       | 0.46 | 0.41    | I/I         | 1.34 (1.14-1.58)                  | 4.72E-04  | 1.16 (1.05-1.27) | 2.22E-03  | 0.13           | 57                    | 1.20 (1.08-1.35) | 8.63E-06      |  |
| rs2248316       | 11397073 | A/C       | 0.46 | 0.50    | I/I         | 0.81 (0.68-0.95)                  | 8.80E-03  | 0.85 (0.77-0.93) | 3.14E-04  | 0.61           | 0                     | 0.83 (0.75-0.93) | 8.83E-06      |  |
| rs4841536       | 11307454 | A/G       | 0.48 | 0.43    | I/I         | 1.33 (1.14-1.57)                  | 4.73E-04  | 1.16 (1.05-1.27) | 2.37E-03  | 0.13           | 56                    | 1.20 (1.08-1.35) | 9.26E-06      |  |
| rs11774572      | 11446800 | T/C       | 0.46 | 0.42    | I/I         | 1.14 (0.97-1.34)                  | 1.05E-01  | 1.22 (1.11-1.34) | 2.53E-05  | 0.49           | 0                     | 1.20 (1.07-1.34) | 9.33E-06      |  |
| rs17153498      | 11446955 | A/G       | 0.46 | 0.42    | I/I         | 1.14 (0.97-1.34)                  | 1.11E-01  | 1.22 (1.11-1.34) | 2.41E-05  | 0.48           | 0                     | 1.20 (1.07-1.34) | 9.61E-06      |  |
| rs2409770       | 11304116 | T/C       | 0.46 | 0.41    | I/I         | 1.34 (1.14-1.58)                  | 4.72E-04  | 1.15 (1.05-1.26) | 2.57E-03  | 0.12           | 59                    | 1.20 (1.07-1.35) | 1.03E-05      |  |
| rs9693089       | 11298385 | G/A       | 0.31 | 0.35    | I/I         | 0.79 (0.66-0.94)                  | 6.75E-03  | 0.84 (0.76-0.93) | 4.69E-04  | 0.53           | 0                     | 0.82 (0.73-0.93) | 1.07E-05      |  |
| rs2618434       | 11398865 | A/G       | 0.46 | 0.50    | O/O         | 0.81 (0.69-0.95)                  | 1.01E-02  | 0.85 (0.77-0.93) | 3.45E-04  | 0.63           | 0                     | 0.84 (0.75-0.93) | 1.09E-05      |  |
| rs10503423      | 11287081 | G/C       | 0.40 | 0.36    | I/I         | 1.18 (0.99-1.40)                  | 5.96E-02  | 1.21 (1.10-1.33) | 6.12E-05  | 0.78           | 0                     | 1.20 (1.07-1.35) | 1.11E-05      |  |
| rs13259219      | 11297277 | C/T       | 0.30 | 0.34    | O/O         | 0.80 (0.67-0.95)                  | 9.88E-03  | 0.84 (0.76-0.92) | 3.66E-04  | 0.64           | 0                     | 0.82 (0.73-0.93) | 1.13E-05      |  |
| rs12549144      | 11422861 | C/G       | 0.52 | 0.48    | I/I         | 1.28 (1.09-1.50)                  | 2.58E-03  | 1.17 (1.06-1.28) | 1.05E-03  | 0.31           | 1                     | 1.20 (1.07-1.34) | 1.20E-05      |  |
| rs10448146      | 11289024 | T/C       | 0.42 | 0.38    | I/I         | 1.17 (0.99-1.38)                  | 6.27E-02  | 1.21 (1.10-1.32) | 6.71E-05  | 0.74           | 0                     | 1.20 (1.07-1.34) | 1.27E-05      |  |
| rs56051089      | 11447119 | T/C       | 0.46 | 0.42    | I/I         | 1.14 (0.97-1.34)                  | 1.16E-01  | 1.22 (1.11-1.33) | 3.19E-05  | 0.48           | 0                     | 1.19 (1.07-1.34) | 1.30E-05      |  |
| rs10448145      | 11289769 | T/G       | 0.42 | 0.38    | O/O         | 1.18 (1.00-1.39)                  | 5.39E-02  | 1.20 (1.10-1.32) | 8.91E-05  | 0.81           | 0                     | 1.20 (1.07-1.34) | 1.40E-05      |  |
| rs35619722      | 11310593 | A/G       | 0.37 | 0.41    | I/I         | 0.78 (0.66-0.92)                  | 3.31E-03  | 0.85 (0.78-0.94) | 1.04E-03  | 0.36           | 0                     | 0.83 (0.74-0.93) | 1.44E-05      |  |
| rs2001707       | 11277433 | T/C       | 0.42 | 0.46    | I/I         | 0.82 (0.70-0.97)                  | 1.91E-02  | 0.84 (0.77-0.92) | 2.93E-04  | 0.82           | 0                     | 0.84 (0.75-0.94) | 1.61E-05      |  |
| rs12677146      | 11450737 | C/G       | 0.38 | 0.34    | I/I         | 1.14 (0.97-1.35)                  | 1.22E-01  | 1.22 (1.11-1.34) | 4.13E-05  | 0.51           | 0                     | 1.20 (1.07-1.35) | 1.73E-05      |  |
| rs11784897      | 11310442 | G/A       | 0.37 | 0.41    | I/I         | 0.78 (0.66-0.92)                  | 3.29E-03  | 0.86 (0.78-0.94) | 1.37E-03  | 0.33           | 0                     | 0.83 (0.74-0.94) | 1.95E-05      |  |
| rs11780420      | 11446421 | A/G       | 0.46 | 0.42    | I/I         | 1.15 (0.98-1.36)                  | 9.01E-02  | 1.21 (1.10-1.33) | 7.04E-05  | 0.62           | 0                     | 1.19 (1.06-1.33) | 1.98E-05      |  |
| rs17744726      | 11411823 | G/A       | 0.26 | 0.30    | O/I         | 0.74 (0.61-0.88)                  | 9.50E-04  | 0.86 (0.77-0.95) | 3.09E-03  | 0.15           | 52                    | 0.82 (0.72-0.93) | 1.99E-05      |  |
| rs2409779       | 11311340 | A/T       | 0.37 | 0.41    | I/I         | 0.78 (0.66-0.92)                  | 3.31E-03  | 0.86 (0.78-0.94) | 1.53E-03  | 0.33           | 0                     | 0.84 (0.74-0.94) | 2.19E-05      |  |
| rs74510602      | 11311339 | A/C       | 0.37 | 0.41    | I/I         | 0.78 (0.66-0.92)                  | 3.42E-03  | 0.86 (0.78-0.94) | 1.51E-03  | 0.33           | 0                     | 0.84 (0.75-0.94) | 2.21E-05      |  |
| rs12549150      | 11422936 | C/T       | 0.52 | 0.48    | O/O         | 1.25 (1.06-1.46)                  | 6.95E-03  | 1.17 (1.06-1.28) | 9.18E-04  | 0.48           | 0                     | 1.19 (1.06-1.33) | 2.21E-05      |  |
| rs35822699      | 11372443 | C/G       | 0.28 | 0.32    | I/I         | 0.79 (0.66-0.95)                  | 1.05E-02  | 0.84 (0.76-0.93) | 7.18E-04  | 0.59           | 0                     | 0.83 (0.73-0.93) | 2.38E-05      |  |
| rs1382567       | 11350899 | C/T       | 0.50 | 0.45    | O/O         | 1.13 (0.96-1.32)                  | 1.49E-01  | 1.21 (1.10-1.33) | 4.51E-05  | 0.45           | 0                     | 1.19 (1.06-1.32) | 2.40E-05      |  |

**Supplementary Table 10.** Association analysis in *BLK*

| SNP             | BP       | Alleles   |      | MAF     |             | Observed or Imputed in Dataset1/2 | Dataset 1 |                  | Dataset 2 |       | Test of heterogeneity |                  | Meta analysis |  |
|-----------------|----------|-----------|------|---------|-------------|-----------------------------------|-----------|------------------|-----------|-------|-----------------------|------------------|---------------|--|
|                 |          | maj / min | Case | Control | OR (95% CI) |                                   | P         | OR (95% CI)      | P         | $P_Q$ | $I^2$                 | OR (95% CI)      | P             |  |
| rs4841541       | 11311829 | C/G       | 0.35 | 0.39    | I/I         | 0.80 (0.68-0.95)                  | 9.96E-03  | 0.85 (0.77-0.93) | 7.72E-04  | 0.57  | 0                     | 0.84 (0.74-0.94) | 2.47E-05      |  |
| rs4840570       | 11367730 | G/T       | 0.28 | 0.32    | I/I         | 0.82 (0.69-0.98)                  | 2.54E-02  | 0.83 (0.75-0.92) | 3.50E-04  | 0.86  | 0                     | 0.83 (0.73-0.94) | 2.48E-05      |  |
| rs12549796      | 11289697 | A/G       | 0.42 | 0.38    | I/I         | 1.16 (0.98-1.37)                  | 7.79E-02  | 1.20 (1.09-1.32) | 1.08E-04  | 0.71  | 0                     | 1.19 (1.06-1.33) | 2.48E-05      |  |
| rs4841556       | 11411543 | A/T       | 0.26 | 0.30    | I/I         | 0.74 (0.61-0.88)                  | 1.02E-03  | 0.86 (0.78-0.95) | 3.74E-03  | 0.15  | 53                    | 0.82 (0.73-0.93) | 2.62E-05      |  |
| rs12541800      | 11423072 | A/G       | 0.52 | 0.48    | I/I         | 1.25 (1.07-1.47)                  | 5.78E-03  | 1.16 (1.06-1.27) | 1.23E-03  | 0.42  | 0                     | 1.19 (1.06-1.33) | 2.63E-05      |  |
| rs2898279       | 11295251 | G/C       | 0.30 | 0.34    | I/I         | 0.78 (0.66-0.93)                  | 5.74E-03  | 0.85 (0.77-0.94) | 1.27E-03  | 0.40  | 0                     | 0.83 (0.74-0.94) | 2.69E-05      |  |
| rs13439415      | 11310012 | A/T       | 0.37 | 0.41    | I/I         | 0.78 (0.66-0.92)                  | 3.16E-03  | 0.86 (0.78-0.95) | 1.96E-03  | 0.30  | 6                     | 0.84 (0.75-0.94) | 2.80E-05      |  |
| chr8:11348053:1 | 11348053 | CA/C      | 0.50 | 0.46    | I/I         | 1.12 (0.95-1.31)                  | 1.70E-01  | 1.21 (1.10-1.33) | 4.52E-05  | 0.40  | 0                     | 1.18 (1.06-1.32) | 2.88E-05      |  |
| rs7011778       | 11416171 | C/T       | 0.42 | 0.38    | O/O         | 1.30 (1.10-1.53)                  | 1.78E-03  | 1.15 (1.05-1.26) | 2.96E-03  | 0.20  | 38                    | 1.19 (1.06-1.33) | 2.94E-05      |  |
| rs978804        | 11343673 | T/C       | 0.50 | 0.46    | O/O         | 1.12 (0.96-1.32)                  | 1.66E-01  | 1.21 (1.10-1.33) | 5.12E-05  | 0.43  | 0                     | 1.18 (1.06-1.32) | 2.96E-05      |  |
| rs13272061      | 11352261 | T/G       | 0.50 | 0.46    | I/I         | 1.12 (0.95-1.32)                  | 1.66E-01  | 1.21 (1.10-1.33) | 4.92E-05  | 0.41  | 0                     | 1.18 (1.06-1.32) | 2.96E-05      |  |
| rs4841562       | 11425077 | C/T       | 0.41 | 0.38    | O/I         | 1.28 (1.09-1.51)                  | 2.88E-03  | 1.16 (1.05-1.27) | 2.23E-03  | 0.28  | 16                    | 1.19 (1.06-1.33) | 2.98E-05      |  |
| rs11785520      | 11268560 | T/C       | 0.46 | 0.42    | I/I         | 1.22 (1.04-1.44)                  | 1.52E-02  | 1.17 (1.07-1.29) | 6.63E-04  | 0.67  | 0                     | 1.19 (1.06-1.33) | 3.00E-05      |  |
| rs13439487      | 11310529 | T/G       | 0.37 | 0.41    | I/I         | 0.78 (0.66-0.92)                  | 3.29E-03  | 0.86 (0.78-0.95) | 2.07E-03  | 0.30  | 6                     | 0.84 (0.75-0.94) | 3.07E-05      |  |
| rs13274269      | 11449325 | G/T       | 0.38 | 0.34    | I/I         | 1.15 (0.97-1.36)                  | 1.06E-01  | 1.21 (1.10-1.33) | 9.60E-05  | 0.60  | 0                     | 1.19 (1.06-1.34) | 3.13E-05      |  |
| rs1057750       | 11296091 | A/G       | 0.30 | 0.34    | I/I         | 0.80 (0.67-0.95)                  | 1.16E-02  | 0.85 (0.77-0.93) | 8.72E-04  | 0.58  | 0                     | 0.83 (0.74-0.94) | 3.16E-05      |  |
| rs10098782      | 11417582 | T/C       | 0.40 | 0.36    | I/I         | 1.28 (1.08-1.51)                  | 4.06E-03  | 1.16 (1.05-1.27) | 2.01E-03  | 0.31  | 4                     | 1.19 (1.06-1.34) | 3.44E-05      |  |
| rs57526558      | 11310568 | T/G       | 0.37 | 0.41    | I/I         | 0.78 (0.66-0.92)                  | 3.31E-03  | 0.86 (0.79-0.95) | 2.30E-03  | 0.30  | 8                     | 0.84 (0.75-0.94) | 3.47E-05      |  |
| rs1600252       | 11345644 | G/A       | 0.50 | 0.46    | I/I         | 1.11 (0.95-1.31)                  | 1.95E-01  | 1.21 (1.10-1.33) | 4.73E-05  | 0.37  | 0                     | 1.18 (1.06-1.32) | 3.51E-05      |  |
| rs2001463       | 11295511 | G/A       | 0.29 | 0.33    | I/I         | 0.79 (0.66-0.94)                  | 9.72E-03  | 0.85 (0.77-0.94) | 1.17E-03  | 0.50  | 0                     | 0.83 (0.74-0.94) | 3.73E-05      |  |
| rs11786148      | 11423781 | G/C       | 0.42 | 0.39    | I/I         | 1.31 (1.11-1.55)                  | 1.33E-03  | 1.14 (1.04-1.26) | 4.37E-03  | 0.16  | 50                    | 1.19 (1.06-1.33) | 3.78E-05      |  |
| rs978802        | 11343278 | T/A       | 0.50 | 0.46    | I/I         | 1.12 (0.95-1.31)                  | 1.72E-01  | 1.21 (1.10-1.32) | 6.62E-05  | 0.43  | 0                     | 1.18 (1.06-1.32) | 4.04E-05      |  |
| rs6982763       | 11277560 | A/T       | 0.43 | 0.39    | I/I         | 1.23 (1.05-1.45)                  | 1.12E-02  | 1.17 (1.06-1.28) | 1.16E-03  | 0.56  | 0                     | 1.19 (1.06-1.33) | 4.11E-05      |  |
| rs7830445       | 11302061 | G/A       | 0.31 | 0.35    | I/I         | 0.79 (0.66-0.94)                  | 7.05E-03  | 0.86 (0.78-0.94) | 1.65E-03  | 0.42  | 0                     | 0.84 (0.74-0.94) | 4.15E-05      |  |
| rs1600250       | 11345425 | C/A       | 0.50 | 0.46    | I/I         | 1.11 (0.95-1.31)                  | 1.95E-01  | 1.21 (1.10-1.32) | 5.92E-05  | 0.39  | 0                     | 1.18 (1.06-1.32) | 4.26E-05      |  |
| rs11774541      | 11270993 | C/A       | 0.41 | 0.45    | I/I         | 0.84 (0.71-0.99)                  | 3.40E-02  | 0.85 (0.77-0.93) | 5.24E-04  | 0.92  | 0                     | 0.84 (0.75-0.95) | 4.80E-05      |  |
| rs7829381       | 11344573 | G/A       | 0.49 | 0.46    | I/I         | 1.12 (0.95-1.31)                  | 1.73E-01  | 1.20 (1.10-1.32) | 8.14E-05  | 0.44  | 0                     | 1.18 (1.05-1.32) | 4.84E-05      |  |
| rs978803        | 11343475 | G/A       | 0.49 | 0.46    | O/O         | 1.12 (0.95-1.31)                  | 1.76E-01  | 1.20 (1.10-1.32) | 7.89E-05  | 0.43  | 0                     | 1.18 (1.05-1.32) | 4.84E-05      |  |
| rs11250135      | 11278146 | G/T       | 0.43 | 0.39    | O/O         | 1.23 (1.04-1.44)                  | 1.26E-02  | 1.17 (1.06-1.28) | 1.27E-03  | 0.58  | 0                     | 1.18 (1.06-1.32) | 4.96E-05      |  |
| rs10104336      | 11268344 | A/G       | 0.45 | 0.42    | I/I         | 1.20 (1.02-1.41)                  | 2.98E-02  | 1.17 (1.07-1.29) | 6.45E-04  | 0.84  | 0                     | 1.18 (1.06-1.32) | 5.24E-05      |  |
| rs11250140      | 11346592 | C/A       | 0.49 | 0.46    | I/I         | 1.12 (0.95-1.31)                  | 1.83E-01  | 1.20 (1.10-1.32) | 8.24E-05  | 0.42  | 0                     | 1.18 (1.05-1.32) | 5.27E-05      |  |
| rs35005793      | 11450472 | G/A       | 0.38 | 0.34    | I/I         | 1.14 (0.96-1.35)                  | 1.28E-01  | 1.20 (1.09-1.32) | 1.41E-04  | 0.59  | 0                     | 1.19 (1.06-1.33) | 5.43E-05      |  |
| rs34163377      | 11450213 | C/G       | 0.38 | 0.34    | I/I         | 1.13 (0.95-1.34)                  | 1.61E-01  | 1.21 (1.10-1.33) | 1.04E-04  | 0.49  | 0                     | 1.18 (1.06-1.33) | 5.46E-05      |  |
| chr8:11268623:D | 11268623 | C/CA      | 0.46 | 0.42    | I/I         | 1.21 (1.03-1.43)                  | 2.11E-02  | 1.17 (1.07-1.28) | 9.94E-04  | 0.71  | 0                     | 1.18 (1.06-1.32) | 5.98E-05      |  |
| rs2467520       | 11398953 | T/C       | 0.46 | 0.50    | I/I         | 0.81 (0.69-0.95)                  | 1.07E-02  | 0.86 (0.79-0.95) | 1.74E-03  | 0.49  | 0                     | 0.85 (0.76-0.95) | 6.11E-05      |  |
| rs13275905      | 11273139 | C/A       | 0.43 | 0.39    | I/I         | 1.23 (1.04-1.44)                  | 1.25E-02  | 1.16 (1.06-1.28) | 1.59E-03  | 0.56  | 0                     | 1.18 (1.06-1.32) | 6.27E-05      |  |
| rs11995206      | 11450133 | G/A       | 0.45 | 0.41    | I/I         | 1.13 (0.96-1.32)                  | 1.51E-01  | 1.20 (1.09-1.31) | 1.39E-04  | 0.52  | 0                     | 1.18 (1.05-1.32) | 6.63E-05      |  |
| rs2250986       | 11422289 | G/C       | 0.42 | 0.39    | I/I         | 1.29 (1.09-1.53)                  | 2.75E-03  | 1.14 (1.04-1.26) | 4.67E-03  | 0.22  | 35                    | 1.18 (1.06-1.33) | 6.72E-05      |  |
| rs4841558       | 11415597 | T/C       | 0.42 | 0.38    | I/I         | 1.28 (1.09-1.51)                  | 2.85E-03  | 1.14 (1.04-1.25) | 4.69E-03  | 0.22  | 32                    | 1.18 (1.06-1.32) | 6.87E-05      |  |
| rs7007439       | 11415794 | A/T       | 0.41 | 0.38    | I/I         | 1.28 (1.09-1.51)                  | 2.85E-03  | 1.14 (1.04-1.25) | 5.08E-03  | 0.22  | 34                    | 1.18 (1.05-1.32) | 7.51E-05      |  |
| rs2898280       | 11321292 | A/G       | 0.53 | 0.49    | O/O         | 1.12 (0.96-1.32)                  | 1.51E-01  | 1.19 (1.09-1.30) | 1.69E-04  | 0.54  | 0                     | 1.17 (1.05-1.31) | 7.85E-05      |  |
| chr8:11275853:D | 11275853 | C/CA      | 0.43 | 0.40    | I/I         | 1.22 (1.04-1.43)                  | 1.61E-02  | 1.16 (1.06-1.27) | 1.67E-03  | 0.61  | 0                     | 1.18 (1.05-1.32) | 8.09E-05      |  |
| rs4841545       | 11369236 | G/C       | 0.29 | 0.33    | I/I         | 0.84 (0.70-1.00)                  | 4.57E-02  | 0.84 (0.76-0.93) | 6.89E-04  | 0.95  | 0                     | 0.84 (0.74-0.95) | 8.24E-05      |  |
| rs28639872      | 11297387 | C/T       | 0.32 | 0.36    | I/I         | 0.81 (0.69-0.97)                  | 1.81E-02  | 0.86 (0.78-0.94) | 1.76E-03  | 0.61  | 0                     | 0.84 (0.75-0.95) | 9.37E-05      |  |
| rs10097015      | 11421384 | C/T       | 0.39 | 0.36    | I/I         | 1.26 (1.07-1.49)                  | 6.32E-03  | 1.15 (1.04-1.26) | 3.94E-03  | 0.34  | 0                     | 1.18 (1.05-1.32) | 9.87E-05      |  |
| rs7003840       | 11266131 | C/T       | 0.44 | 0.40    | O/O         | 1.20 (1.03-1.41)                  | 2.26E-02  | 1.16 (1.06-1.27) | 1.61E-03  | 0.70  | 0                     | 1.17 (1.05-1.31) | 1.03E-04      |  |
| rs7814414       | 11415184 | G/C       | 0.41 | 0.38    | I/I         | 1.28 (1.09-1.51)                  | 3.20E-03  | 1.14 (1.04-1.25) | 6.26E-03  | 0.22  | 34                    | 1.18 (1.05-1.32) | 1.04E-04      |  |
| rs12541802      | 11423142 | A/G       | 0.41 | 0.38    | I/I         | 1.27 (1.08-1.50)                  | 4.47E-03  | 1.14 (1.04-1.25) | 5.44E-03  | 0.26  | 21                    | 1.18 (1.05-1.32) | 1.11E-04      |  |
| rs1042689       | 11421793 | C/T       | 0.39 | 0.36    | O/O         | 1.28 (1.08-1.51)                  | 4.00E-03  | 1.14 (1.04-1.25) | 5.91E-03  | 0.25  | 26                    | 1.18 (1.05-1.32) | 1.13E-04      |  |
| rs899366        | 11430485 | G/A       | 0.35 | 0.32    | O/O         | 1.21 (1.02-1.43)                  | 2.67E-02  | 1.17 (1.06-1.28) | 1.75E-03  | 0.71  | 0                     | 1.18 (1.05-1.32) | 1.29E-04      |  |
| rs7840433       | 11422170 | G/A       | 0.39 | 0.36    | I/I         | 1.25 (1.06-1.48)                  | 8.80E-03  | 1.15 (1.04-1.26) | 4.30E-03  | 0.37  | 0                     | 1.18 (1.05-1.32) | 1.38E-04      |  |
| rs7836059       | 11272164 | G/A       | 0.45 | 0.49    | O/O         | 0.86 (0.73-1.00)                  | 5.75E-02  | 0.86 (0.78-0.94) | 9.45E-04  | 0.98  | 0                     | 0.86 (0.77-0.96) | 1.39E-04      |  |
| rs11786737      | 11405336 | C/T       | 0.28 | 0.32    | I/I         | 0.79 (0.67-0.94)                  | 9.42E-03  | 0.86 (0.78-0.95) | 4.13E-03  | 0.41  | 0                     | 0.84 (0.75-0.95) | 1.40E-04      |  |
| rs4841566       | 11432438 | G/C       | 0.36 | 0.32    | I/I         | 1.21 (1.02-1.43)                  | 3.27E-02  | 1.17 (1.06-1.29) | 1.69E-03  | 0.74  | 0                     | 1.18 (1.05-1.33) | 1.48E-04      |  |
| rs11784016      | 11366670 | C/T       | 0.28 | 0.32    | I/I         | 0.82 (0.69-0.98)                  | 2.77E-02  | 0.85 (0.77-0.94) | 1.95E-03  | 0.70  | 0                     | 0.84 (0.75-0.95) | 1.49E-04      |  |
| rs11782823      | 11260385 | A/C       | 0.44 | 0.41    | I/I         | 1.26 (1.07-1.49)                  | 4.98E-03  | 1.14 (1.04-1.25) | 6.71E-03  | 0.27  | 17                    | 1.17 (1.05-1.31) | 1.50E-04      |  |
| rs35592057      | 11323532 | C/G       | 0.18 | 0.21    | I/I         | 0.81 (0.66-1.00)                  | 5.30E-02  | 0.82 (0.73-0.93) | 1.20E-03  | 0.92  | 0                     | 0.82 (0.71-0.95) | 1.62E-04      |  |
| rs6985489       | 11266175 | A/T       | 0.44 | 0.41    | I/I         | 1.21 (1.03-1.42)                  | 1.88E-02  | 1.15 (1.05-1.26) | 2.92E-03  | 0.58  | 0                     | 1.17 (1.04-1.31) | 1.64E-04      |  |
| rs4841563       | 11425081 | G/T       | 0.38 | 0.35    | I/I         | 1.25 (1.06-1.48)                  | 8.59E-03  | 1.14 (1.04-1.26) | 5.13E-03  | 0.36  | 0                     | 1.17 (1.05-1.32) | 1.64E-04      |  |
| rs35353728      | 11432453 | C/T       | 0.34 | 0.31    | I/I         | 1.17 (0.98-1.39)                  | 7.80E-02  | 1.18 (1.07-1.30) | 8.35E-04  | 0.93  | 0                     | 1.18 (1.04-1.32) | 1.65E-04      |  |
| rs10094320      | 11268077 | C/T       | 0.44 | 0.41    | I/I         | 1.21 (1.02-1.42)                  | 2.35E-02  | 1.15 (1.05-1.26) | 2.71E-03  | 0.64  | 0                     | 1.17 (1.04-1.30) | 1.81E-04      |  |
| rs2409764       | 11281273 | A/G       | 0.41 | 0.45    | O/O         | 0.85 (0.72-0.99)                  | 3.98E-02  | 0.86 (0.79-0.95) | 1.85E-03  | 0.83  | 0                     | 0.86 (0.77-0.96) | 1.91E-04      |  |
| rs2618443       | 11384556 | C/T       | 0.49 | 0.45    | O/I         | 1.13 (0.97-1.33)                  | 1.25E-01  | 1.17 (1.07-1.29) | 5.86E-04  | 0.70  | 0                     | 1.16 (1.04-1.30) | 1.94E-04      |  |
| rs4581006       | 11305365 | G/A       | 0.32 | 0.35    | I/I         | 0.79 (0.66-0.94)                  | 6.97E-03  | 0.88 (0.79-0.96) | 6.86E-03  | 0.30  | 7                     | 0.85 (0.75-0.96) | 1.96E-04      |  |
| rs6989817       | 11330364 | C/A       | 0.41 | 0.45    | O/I         | 0.91 (0.77-1.07)                  | 2.41E-01  | 0.84 (0.77-0.92) | 2.66E-04  | 0.43  | 0                     | 0.86 (0.77-0.96) | 2.07E-04      |  |
| rs6993930       | 11330365 | C/T       | 0.41 | 0.45    | I/I         | 0.91 (0.77-1.07)                  | 2.55E-01  | 0.84 (0.77-0.92) | 2.71E-04  | 0.41  | 0                     | 0.86 (0.77-0.96) | 2.25E-04      |  |
| rs10097005      | 11421358 | C/A       | 0.39 | 0.36    | I/I         | 1.28 (1.08-1.51)                  | 3.90E-03  | 1.13 (1.03-1.24) | 1.13E-02  | 0.20  | 39                    | 1.17 (1.04-1.31) | 2.32E-04      |  |

**Supplementary Table 10.** Association analysis in *BLK*

| SNP             | BP       | Alleles   |      | MAF     |             | Observed or Imputed in Dataset1/2 | Dataset 1 |                  | Dataset 2 |       | Test of heterogeneity |                  | Meta analysis |  |
|-----------------|----------|-----------|------|---------|-------------|-----------------------------------|-----------|------------------|-----------|-------|-----------------------|------------------|---------------|--|
|                 |          | maj / min | Case | Control | OR (95% CI) |                                   | P         | OR (95% CI)      | P         | $P_Q$ | $I^2$                 | OR (95% CI)      | P             |  |
|                 |          |           |      |         |             |                                   |           |                  |           |       |                       |                  |               |  |
| rs7007712       | 11290802 | C/T       | 0.29 | 0.32    | O / I       | 0.89 (0.75-1.07)                  | 2.14E-01  | 0.83 (0.75-0.92) | 3.71E-04  | 0.49  | 0                     | 0.85 (0.75-0.96) | 2.38E-04      |  |
| rs13255193      | 11309192 | C/T       | 0.49 | 0.46    | I / I       | 1.21 (1.03-1.42)                  | 2.34E-02  | 1.15 (1.04-1.26) | 3.81E-03  | 0.59  | 0                     | 1.16 (1.04-1.30) | 2.58E-04      |  |
| rs11775640      | 11302630 | C/A       | 0.17 | 0.20    | I / I       | 0.77 (0.63-0.96)                  | 1.80E-02  | 0.84 (0.75-0.95) | 4.62E-03  | 0.49  | 0                     | 0.82 (0.71-0.95) | 2.58E-04      |  |
| rs2003423       | 11303011 | G/A       | 0.33 | 0.37    | O / I       | 0.82 (0.69-0.97)                  | 2.37E-02  | 0.87 (0.79-0.96) | 3.89E-03  | 0.58  | 0                     | 0.86 (0.76-0.96) | 2.64E-04      |  |
| rs4841550       | 11389224 | G/C       | 0.43 | 0.46    | I / I       | 0.84 (0.71-1.00)                  | 4.49E-02  | 0.87 (0.79-0.95) | 2.42E-03  | 0.78  | 0                     | 0.86 (0.77-0.96) | 2.78E-04      |  |
| rs6999270       | 11256826 | A/G       | 0.42 | 0.39    | I / I       | 1.21 (1.03-1.43)                  | 2.05E-02  | 1.15 (1.04-1.26) | 4.65E-03  | 0.54  | 0                     | 1.16 (1.04-1.30) | 2.84E-04      |  |
| rs9792397       | 11302721 | C/T       | 0.33 | 0.37    | I / I       | 0.82 (0.69-0.97)                  | 2.19E-02  | 0.87 (0.79-0.96) | 4.53E-03  | 0.55  | 0                     | 0.86 (0.76-0.96) | 2.91E-04      |  |
| rs7350091       | 11267777 | G/A       | 0.45 | 0.41    | I / I       | 1.22 (1.03-1.43)                  | 1.86E-02  | 1.14 (1.04-1.25) | 5.12E-03  | 0.51  | 0                     | 1.16 (1.04-1.30) | 2.93E-04      |  |
| rs35370321      | 11426400 | T/G       | 0.39 | 0.36    | I / I       | 1.26 (1.06-1.50)                  | 7.25E-03  | 1.13 (1.03-1.24) | 9.53E-03  | 0.27  | 18                    | 1.17 (1.04-1.31) | 2.94E-04      |  |
| rs10100187      | 11257495 | C/T       | 0.42 | 0.38    | I / I       | 1.17 (1.00-1.38)                  | 5.67E-02  | 1.16 (1.05-1.27) | 2.11E-03  | 0.90  | 0                     | 1.16 (1.04-1.30) | 2.98E-04      |  |
| rs2729940       | 11382367 | G/A       | 0.46 | 0.42    | O / O       | 1.13 (0.96-1.33)                  | 1.40E-01  | 1.17 (1.07-1.28) | 8.55E-04  | 0.71  | 0                     | 1.16 (1.04-1.29) | 3.08E-04      |  |
| rs28485693      | 11300047 | C/G       | 0.17 | 0.20    | I / I       | 0.77 (0.62-0.95)                  | 1.70E-02  | 0.85 (0.75-0.95) | 5.86E-03  | 0.45  | 0                     | 0.82 (0.71-0.95) | 3.16E-04      |  |
| rs2898289       | 11418385 | G/A       | 0.38 | 0.35    | I / I       | 1.22 (1.03-1.44)                  | 2.19E-02  | 1.14 (1.04-1.26) | 4.93E-03  | 0.53  | 0                     | 1.16 (1.04-1.31) | 3.19E-04      |  |
| rs2279169       | 11421016 | G/A       | 0.39 | 0.36    | I / I       | 1.25 (1.06-1.48)                  | 7.39E-03  | 1.13 (1.03-1.24) | 1.02E-02  | 0.28  | 14                    | 1.16 (1.04-1.30) | 3.19E-04      |  |
| rs35067819      | 11423537 | G/A       | 0.38 | 0.35    | I / I       | 1.25 (1.05-1.47)                  | 9.52E-03  | 1.13 (1.03-1.24) | 8.75E-03  | 0.33  | 0                     | 1.16 (1.04-1.30) | 3.20E-04      |  |
| rs13262953      | 11420221 | G/A       | 0.39 | 0.36    | I / I       | 1.23 (1.04-1.45)                  | 1.68E-02  | 1.14 (1.04-1.25) | 6.23E-03  | 0.45  | 0                     | 1.16 (1.04-1.30) | 3.33E-04      |  |
| rs11775779      | 11297707 | T/C       | 0.17 | 0.20    | I / I       | 0.78 (0.63-0.97)                  | 2.33E-02  | 0.85 (0.75-0.95) | 5.43E-03  | 0.52  | 0                     | 0.83 (0.72-0.96) | 3.71E-04      |  |
| rs4841561       | 11418773 | C/T       | 0.38 | 0.35    | I / I       | 1.22 (1.03-1.44)                  | 2.21E-02  | 1.14 (1.04-1.25) | 5.76E-03  | 0.52  | 0                     | 1.16 (1.04-1.30) | 3.79E-04      |  |
| rs11250148      | 11419852 | T/C       | 0.39 | 0.36    | O / O       | 1.24 (1.05-1.46)                  | 1.12E-02  | 1.13 (1.03-1.24) | 9.51E-03  | 0.34  | 0                     | 1.16 (1.04-1.30) | 3.93E-04      |  |
| rs35433745      | 11305635 | G/A       | 0.34 | 0.38    | I / I       | 0.79 (0.67-0.94)                  | 8.00E-03  | 0.88 (0.80-0.97) | 1.17E-02  | 0.28  | 14                    | 0.86 (0.76-0.96) | 3.93E-04      |  |
| rs35401006      | 11420104 | C/G       | 0.39 | 0.36    | I / I       | 1.24 (1.05-1.46)                  | 1.22E-02  | 1.13 (1.03-1.24) | 1.01E-02  | 0.35  | 0                     | 1.16 (1.04-1.30) | 4.47E-04      |  |
| rs7823274       | 11299445 | G/C       | 0.17 | 0.20    | I / I       | 0.78 (0.63-0.97)                  | 2.35E-02  | 0.85 (0.75-0.96) | 6.55E-03  | 0.51  | 0                     | 0.83 (0.72-0.96) | 4.54E-04      |  |
| rs13264369      | 11265444 | G/C       | 0.42 | 0.39    | I / I       | 1.14 (0.97-1.34)                  | 1.18E-01  | 1.16 (1.06-1.27) | 1.62E-03  | 0.84  | 0                     | 1.15 (1.03-1.29) | 4.63E-04      |  |
| rs13275123      | 11265448 | T/A       | 0.42 | 0.39    | I / I       | 1.14 (0.97-1.34)                  | 1.18E-01  | 1.16 (1.06-1.27) | 1.62E-03  | 0.84  | 0                     | 1.15 (1.03-1.29) | 4.63E-04      |  |
| rs4840563       | 11320152 | T/C       | 0.22 | 0.25    | O / O       | 0.82 (0.67-0.99)                  | 3.92E-02  | 0.85 (0.77-0.95) | 4.57E-03  | 0.69  | 0                     | 0.84 (0.74-0.96) | 4.69E-04      |  |
| rs13266957      | 11265557 | C/G       | 0.42 | 0.39    | I / I       | 1.14 (0.96-1.34)                  | 1.29E-01  | 1.16 (1.06-1.27) | 1.50E-03  | 0.81  | 0                     | 1.15 (1.03-1.29) | 4.71E-04      |  |
| rs55718444      | 11360081 | G/C       | 0.08 | 0.06    | I / I       | 1.48 (1.05-2.08)                  | 2.50E-02  | 1.27 (1.07-1.51) | 6.74E-03  | 0.44  | 0                     | 1.33 (1.06-1.65) | 4.93E-04      |  |
| rs10109802      | 11419861 | T/G       | 0.39 | 0.36    | O / I       | 1.24 (1.05-1.46)                  | 1.27E-02  | 1.13 (1.03-1.24) | 1.12E-02  | 0.35  | 0                     | 1.16 (1.03-1.30) | 5.13E-04      |  |
| rs2522797       | 11382659 | C/G       | 0.34 | 0.38    | I / I       | 0.89 (0.75-1.05)                  | 1.57E-01  | 0.86 (0.78-0.95) | 2.04E-03  | 0.75  | 0                     | 0.87 (0.77-0.97) | 7.67E-04      |  |
| rs7016396       | 11358990 | T/C       | 0.08 | 0.06    | I / I       | 1.43 (1.01-2.02)                  | 4.29E-02  | 1.27 (1.07-1.52) | 7.12E-03  | 0.56  | 0                     | 1.32 (1.05-1.65) | 7.92E-04      |  |
| rs145819712     | 11263622 | T/G       | 0.45 | 0.41    | I / I       | 1.21 (1.02-1.42)                  | 2.49E-02  | 1.13 (1.03-1.24) | 1.06E-02  | 0.49  | 0                     | 1.15 (1.03-1.29) | 7.93E-04      |  |
| rs7832963       | 11262928 | T/A       | 0.43 | 0.39    | I / I       | 1.16 (0.98-1.37)                  | 7.82E-02  | 1.15 (1.04-1.26) | 4.39E-03  | 0.89  | 0                     | 1.15 (1.03-1.29) | 8.10E-04      |  |
| rs2618445       | 11381187 | G/C       | 0.34 | 0.38    | I / I       | 0.89 (0.75-1.05)                  | 1.79E-01  | 0.86 (0.78-0.95) | 1.92E-03  | 0.71  | 0                     | 0.87 (0.77-0.97) | 8.30E-04      |  |
| rs4840564       | 11320269 | C/G       | 0.22 | 0.25    | I / I       | 0.83 (0.68-1.00)                  | 5.23E-02  | 0.86 (0.77-0.96) | 7.52E-03  | 0.71  | 0                     | 0.85 (0.75-0.97) | 9.81E-04      |  |
| rs17742757      | 11330341 | T/C       | 0.44 | 0.47    | I / I       | 0.93 (0.79-1.10)                  | 3.92E-01  | 0.86 (0.78-0.94) | 9.25E-04  | 0.38  | 0                     | 0.88 (0.79-0.98) | 1.08E-03      |  |
| rs4841531       | 11293390 | C/T       | 0.18 | 0.21    | I / I       | 0.77 (0.62-0.95)                  | 1.42E-02  | 0.87 (0.78-0.98) | 2.09E-02  | 0.30  | 7                     | 0.84 (0.73-0.97) | 1.13E-03      |  |
| rs34443092      | 11291773 | C/G       | 0.19 | 0.22    | I / I       | 0.86 (0.70-1.05)                  | 1.33E-01  | 0.85 (0.76-0.95) | 5.56E-03  | 0.95  | 0                     | 0.85 (0.74-0.98) | 1.65E-03      |  |
| rs34699199      | 11260325 | C/G       | 0.41 | 0.38    | I / I       | 1.15 (0.97-1.36)                  | 1.01E-01  | 1.14 (1.03-1.25) | 9.04E-03  | 0.89  | 0                     | 1.14 (1.02-1.28) | 2.04E-03      |  |
| rs28680779      | 11288040 | A/C       | 0.17 | 0.20    | I / I       | 0.89 (0.73-1.10)                  | 2.94E-01  | 0.84 (0.74-0.94) | 3.44E-03  | 0.58  | 0                     | 0.85 (0.74-0.98) | 2.40E-03      |  |
| rs56302795      | 11293929 | T/C       | 0.19 | 0.22    | I / I       | 0.81 (0.66-0.99)                  | 4.30E-02  | 0.88 (0.78-0.98) | 2.40E-02  | 0.50  | 0                     | 0.86 (0.75-0.99) | 2.81E-03      |  |
| rs12548884      | 11388499 | C/T       | 0.30 | 0.32    | I / I       | 0.80 (0.67-0.96)                  | 1.47E-02  | 0.91 (0.82-1.00) | 4.92E-02  | 0.23  | 30                    | 0.87 (0.77-0.99) | 3.05E-03      |  |
| rs17799348      | 11333521 | C/T       | 0.36 | 0.39    | O / O       | 0.86 (0.73-1.02)                  | 7.62E-02  | 0.89 (0.81-0.98) | 1.78E-02  | 0.74  | 0                     | 0.88 (0.79-0.99) | 3.18E-03      |  |
| rs4841554       | 11408935 | A/G       | 0.30 | 0.33    | I / I       | 0.83 (0.69-0.99)                  | 3.58E-02  | 0.90 (0.82-0.99) | 3.67E-02  | 0.41  | 0                     | 0.88 (0.78-0.99) | 3.93E-03      |  |
| rs2249260       | 11388714 | T/C       | 0.29 | 0.32    | I / I       | 0.79 (0.66-0.95)                  | 1.05E-02  | 0.91 (0.83-1.01) | 7.56E-02  | 0.16  | 49                    | 0.88 (0.78-0.99) | 4.16E-03      |  |
| rs2264306       | 11388449 | G/A       | 0.29 | 0.32    | O / O       | 0.80 (0.67-0.95)                  | 1.31E-02  | 0.91 (0.83-1.01) | 6.97E-02  | 0.19  | 41                    | 0.88 (0.78-0.99) | 4.29E-03      |  |
| rs2264866       | 11388653 | C/T       | 0.29 | 0.32    | I / I       | 0.80 (0.67-0.96)                  | 1.61E-02  | 0.91 (0.83-1.01) | 7.22E-02  | 0.21  | 36                    | 0.88 (0.78-0.99) | 5.07E-03      |  |
| rs62489089      | 11352664 | C/A       | 0.03 | 0.02    | I / I       | 0.96 (0.47-1.97)                  | 9.10E-01  | 1.58 (1.21-2.08) | 8.60E-04  | 0.20  | 38                    | 1.38 (0.93-2.05) | 5.64E-03      |  |
| rs6995080       | 11277003 | G/A       | 0.21 | 0.24    | I / I       | 0.84 (0.69-1.03)                  | 9.41E-02  | 0.88 (0.79-0.99) | 2.99E-02  | 0.69  | 0                     | 0.87 (0.76-1.00) | 6.36E-03      |  |
| rs11781057      | 11276641 | G/A       | 0.20 | 0.22    | I / I       | 0.88 (0.73-1.07)                  | 2.10E-01  | 0.87 (0.78-0.98) | 1.79E-02  | 0.90  | 0                     | 0.87 (0.76-1.00) | 7.50E-03      |  |
| rs28377323      | 11330771 | G/C       | 0.30 | 0.32    | I / I       | 0.91 (0.76-1.08)                  | 2.64E-01  | 0.88 (0.80-0.98) | 1.48E-02  | 0.81  | 0                     | 0.89 (0.79-1.00) | 7.88E-03      |  |
| rs34128921      | 11254365 | C/T       | 0.35 | 0.37    | I / I       | 0.93 (0.78-1.10)                  | 3.89E-01  | 0.88 (0.79-0.97) | 1.01E-02  | 0.59  | 0                     | 0.89 (0.79-1.01) | 8.45E-03      |  |
| chr8:11274012:i | 11274012 | T/TAG     | 0.26 | 0.29    | I / I       | 0.85 (0.71-1.02)                  | 8.33E-02  | 0.90 (0.81-1.00) | 4.36E-02  | 0.61  | 0                     | 0.88 (0.78-1.00) | 8.54E-03      |  |
| chr8:11274013:i | 11274013 | A/AGC     | 0.26 | 0.29    | I / I       | 0.85 (0.71-1.02)                  | 8.33E-02  | 0.90 (0.81-1.00) | 4.36E-02  | 0.61  | 0                     | 0.88 (0.78-1.00) | 8.54E-03      |  |
| rs2001708       | 11277128 | G/C       | 0.21 | 0.24    | I / I       | 0.85 (0.70-1.04)                  | 1.16E-01  | 0.89 (0.79-0.99) | 3.53E-02  | 0.73  | 0                     | 0.88 (0.77-1.01) | 8.84E-03      |  |
| rs74906907      | 11274310 | T/C       | 0.20 | 0.22    | I / I       | 0.87 (0.72-1.06)                  | 1.78E-01  | 0.88 (0.78-0.98) | 2.51E-02  | 0.98  | 0                     | 0.88 (0.76-1.01) | 8.97E-03      |  |
| rs10099353      | 11273794 | G/A       | 0.26 | 0.29    | I / I       | 0.82 (0.68-0.99)                  | 4.08E-02  | 0.91 (0.82-1.01) | 8.13E-02  | 0.35  | 0                     | 0.89 (0.78-1.01) | 1.03E-02      |  |
| rs7000458       | 11274389 | A/C       | 0.28 | 0.30    | I / I       | 0.86 (0.72-1.03)                  | 1.08E-01  | 0.90 (0.82-1.00) | 5.25E-02  | 0.65  | 0                     | 0.89 (0.79-1.01) | 1.26E-02      |  |
| rs2002029       | 11276348 | G/C       | 0.21 | 0.23    | I / I       | 0.86 (0.71-1.05)                  | 1.46E-01  | 0.89 (0.80-1.00) | 4.38E-02  | 0.78  | 0                     | 0.88 (0.77-1.01) | 1.31E-02      |  |
| rs11991127      | 11378740 | A/G       | 0.11 | 0.13    | I / I       | 0.92 (0.71-1.19)                  | 5.28E-01  | 0.83 (0.72-0.96) | 1.16E-02  | 0.51  | 0                     | 0.86 (0.72-1.02) | 1.33E-02      |  |
| rs2306232       | 11405341 | C/A       | 0.50 | 0.48    | I / I       | 1.10 (0.93-1.29)                  | 2.69E-01  | 1.11 (1.01-1.21) | 2.72E-02  | 0.91  | 0                     | 1.10 (0.99-1.23) | 1.39E-02      |  |
| rs6980803       | 11274401 | C/G       | 0.28 | 0.30    | I / I       | 0.85 (0.71-1.02)                  | 8.14E-02  | 0.91 (0.82-1.01) | 7.77E-02  | 0.51  | 0                     | 0.89 (0.79-1.01) | 1.55E-02      |  |
| rs11987137      | 11404924 | A/T       | 0.51 | 0.48    | I / I       | 1.09 (0.93-1.29)                  | 2.74E-01  | 1.11 (1.01-1.21) | 3.02E-02  | 0.92  | 0                     | 1.10 (0.99-1.23) | 1.56E-02      |  |
| rs7824640       | 11405057 | A/G       | 0.52 | 0.49    | I / I       | 1.11 (0.95-1.31)                  | 1.94E-01  | 1.10 (1.00-1.20) | 4.16E-02  | 0.89  | 0                     | 1.10 (0.99-1.23) | 1.57E-02      |  |
| rs7820492       | 11404514 | G/A       | 0.43 | 0.46    | O / O       | 0.90 (0.76-1.05)                  | 1.84E-01  | 0.91 (0.83-1.00) | 4.74E-02  | 0.86  | 0                     | 0.91 (0.81-1.01) | 1.70E-02      |  |
| rs7000625       | 11274471 | A/T       | 0.28 | 0.30    | I / I       | 0.87 (0.73-1.04)                  | 1.31E-01  | 0.91 (0.82-1.01) | 7.13E-02  | 0.67  | 0                     | 0.90 (0.79-1.02) | 1.98E-02      |  |
| rs7017797       | 11274481 | G/C       | 0.28 | 0.31    | I / I       | 0.88 (0.74-1.05)                  | 1.65E-01  | 0.91 (0.82-1.00) | 6.30E-02  | 0.77  | 0                     | 0.90 (0.80-1.02) | 2.07E-02      |  |
| rs145749545     | 11270300 | G/T       | 0.01 | 0.01    | I / I       | 0.65 (0.25-1.72)                  | 3.86E-01  | 0.58 (0.36-0.95) | 3.14E-02  | 0.84  | 0                     | 0.60 (0.32-1.12) | 2.23E-02      |  |

**Supplementary Table 10.** Association analysis in *BLK*

| SNP             | BP       | Alleles   |      | MAF     |             | Observed or Imputed in Dataset1/2 | Dataset 1 |                  | Dataset 2 |                | Test of heterogeneity |                  | Meta analysis |  |
|-----------------|----------|-----------|------|---------|-------------|-----------------------------------|-----------|------------------|-----------|----------------|-----------------------|------------------|---------------|--|
|                 |          | maj / min | Case | Control | OR (95% CI) |                                   | P         | OR (95% CI)      | P         | P <sub>Q</sub> | I <sup>2</sup>        | OR (95% CI)      | P             |  |
|                 |          |           |      |         |             |                                   |           |                  |           |                |                       |                  |               |  |
| rs3802235       | 11438244 | G/A       | 0.02 | 0.02    | I/I         | 2.02 (1.10-3.71)                  | 2.36E-02  | 1.25 (0.89-1.75) | 2.00E-01  | 0.18           | 46                    | 1.43 (0.94-2.16) | 2.24E-02      |  |
| rs4841553       | 11406815 | T/C       | 0.50 | 0.48    | I/I         | 1.09 (0.93-1.28)                  | 2.86E-01  | 1.10 (1.00-1.20) | 4.37E-02  | 0.95           | 0                     | 1.10 (0.98-1.22) | 2.28E-02      |  |
| rs3808499       | 11406900 | T/C       | 0.50 | 0.47    | I/I         | 1.09 (0.93-1.28)                  | 2.95E-01  | 1.10 (1.00-1.20) | 4.27E-02  | 0.94           | 0                     | 1.10 (0.98-1.22) | 2.29E-02      |  |
| rs34078632      | 11407068 | T/C       | 0.50 | 0.48    | I/I         | 1.09 (0.93-1.29)                  | 2.72E-01  | 1.10 (1.00-1.20) | 4.61E-02  | 0.98           | 0                     | 1.10 (0.98-1.22) | 2.30E-02      |  |
| rs61199332      | 11430641 | C/T       | 0.03 | 0.02    | I/I         | 1.84 (1.05-3.19)                  | 3.17E-02  | 1.22 (0.91-1.64) | 1.88E-01  | 0.20           | 38                    | 1.37 (0.95-1.98) | 2.42E-02      |  |
| rs2736359       | 11372099 | G/A       | 0.12 | 0.13    | I/I         | 0.97 (0.76-1.24)                  | 7.98E-01  | 0.84 (0.73-0.97) | 1.47E-02  | 0.33           | 0                     | 0.87 (0.74-1.04) | 2.76E-02      |  |
| chr8:11279385:1 | 11279385 | G/GA      | 0.20 | 0.22    | I/I         | 0.92 (0.75-1.11)                  | 3.72E-01  | 0.89 (0.79-1.00) | 4.38E-02  | 0.80           | 0                     | 0.90 (0.78-1.03) | 2.90E-02      |  |
| rs2251056       | 11349576 | A/C       | 0.15 | 0.16    | O/O         | 0.95 (0.76-1.19)                  | 6.63E-01  | 0.86 (0.76-0.98) | 2.44E-02  | 0.47           | 0                     | 0.89 (0.76-1.04) | 3.24E-02      |  |
| rs2250788       | 11352056 | G/A       | 0.15 | 0.16    | O/O         | 0.96 (0.77-1.21)                  | 7.46E-01  | 0.86 (0.76-0.98) | 2.16E-02  | 0.40           | 0                     | 0.89 (0.76-1.04) | 3.42E-02      |  |
| rs2618480       | 11354107 | C/T       | 0.15 | 0.16    | I/I         | 0.96 (0.77-1.21)                  | 7.44E-01  | 0.86 (0.76-0.98) | 2.35E-02  | 0.40           | 0                     | 0.89 (0.76-1.04) | 3.64E-02      |  |
| rs2618433       | 11324704 | G/A       | 0.12 | 0.13    | I/I         | 0.86 (0.67-1.10)                  | 2.26E-01  | 0.89 (0.77-1.02) | 8.80E-02  | 0.82           | 0                     | 0.88 (0.74-1.04) | 3.67E-02      |  |
| rs2736344       | 11350678 | C/T       | 0.15 | 0.16    | O/O         | 0.96 (0.77-1.20)                  | 7.21E-01  | 0.87 (0.76-0.98) | 2.63E-02  | 0.43           | 0                     | 0.89 (0.76-1.04) | 3.83E-02      |  |
| rs28604385      | 11433427 | G/A       | 0.16 | 0.15    | I/I         | 1.19 (0.95-1.49)                  | 1.31E-01  | 1.10 (0.97-1.24) | 1.41E-01  | 0.53           | 0                     | 1.12 (0.96-1.31) | 4.06E-02      |  |
| rs78161669      | 11393200 | C/T       | 0.02 | 0.02    | I/I         | 0.72 (0.38-1.37)                  | 3.23E-01  | 0.73 (0.52-1.03) | 7.33E-02  | 0.98           | 0                     | 0.73 (0.48-1.12) | 4.11E-02      |  |
| rs9694294       | 11350721 | G/C       | 0.15 | 0.16    | I/I         | 0.97 (0.78-1.22)                  | 8.08E-01  | 0.86 (0.76-0.98) | 2.47E-02  | 0.37           | 0                     | 0.89 (0.77-1.04) | 4.22E-02      |  |
| rs6601592       | 11323281 | C/G       | 0.12 | 0.13    | I/I         | 0.88 (0.68-1.12)                  | 2.91E-01  | 0.88 (0.77-1.02) | 8.38E-02  | 0.95           | 0                     | 0.88 (0.74-1.05) | 4.28E-02      |  |
| rs76275473      | 11282907 | C/G       | 0.03 | 0.04    | I/I         | 0.72 (0.44-1.19)                  | 1.97E-01  | 0.81 (0.62-1.05) | 1.14E-01  | 0.68           | 0                     | 0.78 (0.57-1.09) | 4.29E-02      |  |
| rs2618432       | 11324482 | T/C       | 0.12 | 0.13    | I/I         | 0.88 (0.69-1.12)                  | 3.00E-01  | 0.89 (0.77-1.02) | 8.53E-02  | 0.96           | 0                     | 0.88 (0.75-1.05) | 4.46E-02      |  |
| rs998682        | 11353052 | G/A       | 0.15 | 0.16    | I/I         | 0.97 (0.78-1.22)                  | 8.23E-01  | 0.87 (0.76-0.98) | 2.75E-02  | 0.37           | 0                     | 0.90 (0.77-1.05) | 4.69E-02      |  |
| rs2254546       | 11343680 | G/A       | 0.15 | 0.16    | I/I         | 0.96 (0.77-1.21)                  | 7.56E-01  | 0.87 (0.77-0.99) | 3.21E-02  | 0.43           | 0                     | 0.90 (0.77-1.05) | 4.77E-02      |  |
| rs2898282       | 11383200 | T/A       | 0.11 | 0.12    | I/I         | 0.94 (0.72-1.22)                  | 6.43E-01  | 0.86 (0.75-0.99) | 4.12E-02  | 0.57           | 0                     | 0.88 (0.74-1.05) | 4.80E-02      |  |
| rs2736364       | 11385118 | G/T       | 0.39 | 0.40    | I/I         | 1.04 (0.89-1.23)                  | 5.96E-01  | 0.88 (0.80-0.97) | 7.88E-03  | 0.07           | 69                    | 0.92 (0.82-1.03) | 4.95E-02      |  |
| rs2736360       | 11373467 | G/A       | 0.12 | 0.13    | O/O         | 0.98 (0.77-1.25)                  | 8.66E-01  | 0.86 (0.74-0.98) | 2.76E-02  | 0.35           | 0                     | 0.89 (0.75-1.05) | 5.05E-02      |  |
| rs2618431       | 11324464 | G/A       | 0.12 | 0.13    | O/I         | 0.88 (0.69-1.12)                  | 3.06E-01  | 0.89 (0.77-1.02) | 9.79E-02  | 0.94           | 0                     | 0.89 (0.75-1.05) | 5.16E-02      |  |
| rs1382566       | 11384841 | G/C       | 0.12 | 0.13    | I/I         | 0.99 (0.77-1.27)                  | 9.31E-01  | 0.85 (0.74-0.98) | 2.58E-02  | 0.31           | 4                     | 0.89 (0.75-1.05) | 5.28E-02      |  |
| rs111706163     | 11432812 | C/G       | 0.16 | 0.15    | I/I         | 1.19 (0.95-1.49)                  | 1.40E-01  | 1.09 (0.96-1.24) | 1.74E-01  | 0.52           | 0                     | 1.12 (0.96-1.30) | 5.29E-02      |  |
| rs2618475       | 11325750 | G/C       | 0.12 | 0.13    | I/I         | 0.88 (0.69-1.12)                  | 3.09E-01  | 0.89 (0.77-1.02) | 1.01E-01  | 0.94           | 0                     | 0.89 (0.75-1.05) | 5.34E-02      |  |
| rs2736319       | 11324025 | C/G       | 0.12 | 0.13    | I/I         | 0.88 (0.69-1.13)                  | 3.16E-01  | 0.89 (0.78-1.02) | 1.05E-01  | 0.94           | 0                     | 0.89 (0.75-1.05) | 5.65E-02      |  |
| chr8:11352827:1 | 11352827 | CAG/C     | 0.15 | 0.16    | I/I         | 0.98 (0.78-1.22)                  | 8.27E-01  | 0.87 (0.77-0.99) | 3.49E-02  | 0.40           | 0                     | 0.90 (0.77-1.05) | 5.69E-02      |  |
| rs2021819       | 11384199 | G/C       | 0.11 | 0.12    | I/I         | 0.93 (0.72-1.20)                  | 5.71E-01  | 0.87 (0.76-1.00) | 5.95E-02  | 0.68           | 0                     | 0.89 (0.75-1.06) | 5.76E-02      |  |
| rs17153245      | 11292247 | A/G       | 0.02 | 0.02    | I/I         | 1.38 (0.76-2.52)                  | 2.88E-01  | 1.28 (0.94-1.76) | 1.17E-01  | 0.83           | 0                     | 1.31 (0.88-1.94) | 5.86E-02      |  |
| rs73209286      | 11374228 | C/T       | 0.12 | 0.13    | I/I         | 0.98 (0.76-1.25)                  | 8.62E-01  | 0.86 (0.75-0.99) | 3.40E-02  | 0.37           | 0                     | 0.89 (0.75-1.06) | 5.90E-02      |  |
| rs35451117      | 11398335 | C/A       | 0.12 | 0.13    | I/I         | 0.98 (0.77-1.26)                  | 8.88E-01  | 0.86 (0.75-0.99) | 3.28E-02  | 0.35           | 0                     | 0.89 (0.75-1.06) | 5.96E-02      |  |
| rs1478900       | 11347660 | T/C       | 0.15 | 0.16    | I/I         | 0.98 (0.78-1.23)                  | 8.58E-01  | 0.87 (0.77-0.99) | 3.59E-02  | 0.38           | 0                     | 0.90 (0.77-1.05) | 6.10E-02      |  |
| rs117003123     | 11282816 | G/A       | 0.03 | 0.04    | I/I         | 0.73 (0.44-1.20)                  | 2.13E-01  | 0.83 (0.64-1.07) | 1.54E-01  | 0.66           | 0                     | 0.80 (0.58-1.11) | 6.17E-02      |  |
| rs78234804      | 11450177 | C/T       | 0.05 | 0.04    | I/I         | 1.64 (1.14-2.34)                  | 7.14E-03  | 1.06 (0.85-1.33) | 6.10E-01  | 0.04           | 75                    | 1.20 (0.92-1.56) | 6.26E-02      |  |
| rs1478895       | 11353335 | C/G       | 0.15 | 0.16    | I/I         | 0.96 (0.77-1.21)                  | 7.41E-01  | 0.88 (0.77-1.00) | 4.66E-02  | 0.49           | 0                     | 0.90 (0.77-1.05) | 6.27E-02      |  |
| rs114832615     | 11432612 | G/A       | 0.02 | 0.01    | I/I         | 1.89 (1.00-3.57)                  | 5.14E-02  | 1.20 (0.83-1.72) | 3.31E-01  | 0.22           | 32                    | 1.36 (0.88-2.11) | 6.31E-02      |  |
| rs6981704       | 11327372 | G/C       | 0.20 | 0.21    | I/I         | 0.88 (0.72-1.08)                  | 2.18E-01  | 0.92 (0.82-1.03) | 1.56E-01  | 0.71           | 0                     | 0.91 (0.79-1.04) | 6.36E-02      |  |
| rs111965253     | 11362431 | G/C       | 0.09 | 0.08    | I/I         | 1.17 (0.86-1.59)                  | 3.28E-01  | 1.13 (0.97-1.33) | 1.18E-01  | 0.86           | 0                     | 1.14 (0.94-1.40) | 6.50E-02      |  |
| rs73537757      | 11362512 | T/C       | 0.09 | 0.08    | I/I         | 1.17 (0.86-1.59)                  | 3.28E-01  | 1.13 (0.97-1.33) | 1.18E-01  | 0.86           | 0                     | 1.14 (0.94-1.40) | 6.50E-02      |  |
| rs2618479       | 11355821 | G/A       | 0.16 | 0.17    | O/O         | 0.94 (0.76-1.18)                  | 6.07E-01  | 0.89 (0.79-1.01) | 6.68E-02  | 0.66           | 0                     | 0.91 (0.78-1.05) | 6.78E-02      |  |
| rs77411380      | 11436354 | C/T       | 0.02 | 0.01    | I/I         | 1.92 (1.01-3.65)                  | 4.62E-02  | 1.18 (0.82-1.69) | 3.74E-01  | 0.19           | 41                    | 1.35 (0.87-2.10) | 7.05E-02      |  |
| rs2250412       | 11354570 | A/G       | 0.15 | 0.16    | I/I         | 0.96 (0.77-1.21)                  | 7.28E-01  | 0.88 (0.78-1.00) | 5.69E-02  | 0.53           | 0                     | 0.91 (0.78-1.06) | 7.21E-02      |  |
| rs73209290      | 11385007 | G/A       | 0.11 | 0.13    | I/I         | 0.99 (0.77-1.27)                  | 9.28E-01  | 0.86 (0.75-1.00) | 4.35E-02  | 0.36           | 0                     | 0.90 (0.76-1.07) | 7.83E-02      |  |
| rs7835996       | 11290059 | T/C       | 0.17 | 0.18    | I/I         | 0.91 (0.73-1.12)                  | 3.68E-01  | 0.91 (0.81-1.03) | 1.30E-01  | 0.98           | 0                     | 0.91 (0.79-1.05) | 7.84E-02      |  |
| rs7003814       | 11290955 | G/A       | 0.11 | 0.12    | I/I         | 0.88 (0.68-1.13)                  | 3.04E-01  | 0.90 (0.78-1.04) | 1.54E-01  | 0.84           | 0                     | 0.89 (0.75-1.06) | 7.94E-02      |  |
| rs73209250      | 11314277 | T/C       | 0.20 | 0.21    | I/I         | 0.85 (0.69-1.04)                  | 1.18E-01  | 0.94 (0.84-1.05) | 2.88E-01  | 0.40           | 0                     | 0.91 (0.79-1.05) | 8.38E-02      |  |
| rs2254660       | 11342986 | G/C       | 0.15 | 0.16    | I/I         | 0.97 (0.77-1.21)                  | 7.61E-01  | 0.89 (0.78-1.01) | 6.50E-02  | 0.52           | 0                     | 0.91 (0.78-1.06) | 8.46E-02      |  |
| rs56003968      | 11312337 | T/C       | 0.20 | 0.21    | I/I         | 0.84 (0.68-1.03)                  | 9.70E-02  | 0.94 (0.84-1.06) | 3.21E-01  | 0.33           | 0                     | 0.91 (0.79-1.05) | 8.56E-02      |  |
| rs7004267       | 11396974 | T/A       | 0.12 | 0.13    | I/I         | 0.99 (0.78-1.26)                  | 9.58E-01  | 0.87 (0.76-1.00) | 4.77E-02  | 0.35           | 0                     | 0.90 (0.76-1.07) | 8.82E-02      |  |
| rs62489137      | 11393992 | T/G       | 0.12 | 0.13    | I/I         | 0.98 (0.77-1.25)                  | 8.79E-01  | 0.87 (0.76-1.00) | 5.70E-02  | 0.42           | 0                     | 0.90 (0.76-1.07) | 9.04E-02      |  |
| rs6980978       | 11274554 | C/T       | 0.36 | 0.37    | O/O         | 0.93 (0.79-1.10)                  | 4.26E-01  | 0.93 (0.85-1.02) | 1.40E-01  | 0.97           | 0                     | 0.93 (0.83-1.05) | 9.45E-02      |  |
| rs10481455      | 11291341 | C/G       | 0.11 | 0.12    | I/I         | 0.88 (0.68-1.14)                  | 3.31E-01  | 0.91 (0.79-1.04) | 1.76E-01  | 0.85           | 0                     | 0.90 (0.76-1.07) | 9.63E-02      |  |
| rs112710642     | 11290682 | C/G       | 0.17 | 0.18    | I/I         | 0.92 (0.74-1.13)                  | 4.16E-01  | 0.91 (0.81-1.03) | 1.48E-01  | 0.99           | 0                     | 0.91 (0.79-1.06) | 9.77E-02      |  |
| rs67909842      | 11293429 | A/G       | 0.20 | 0.21    | I/I         | 0.88 (0.72-1.07)                  | 2.13E-01  | 0.93 (0.83-1.05) | 2.41E-01  | 0.62           | 0                     | 0.92 (0.80-1.05) | 9.78E-02      |  |
| rs73209254      | 11326506 | A/C       | 0.20 | 0.21    | I/I         | 0.90 (0.74-1.10)                  | 3.00E-01  | 0.93 (0.83-1.04) | 1.95E-01  | 0.80           | 0                     | 0.92 (0.80-1.06) | 9.93E-02      |  |
| rs77803115      | 11441789 | C/T       | 0.05 | 0.04    | I/I         | 1.77 (1.23-2.56)                  | 2.10E-03  | 1.00 (0.80-1.26) | 9.89E-01  | 0.01           | 85                    | 1.18 (0.90-1.54) | 1.00E-01      |  |
| rs56235592      | 11313208 | T/C       | 0.20 | 0.21    | I/I         | 0.85 (0.69-1.04)                  | 1.19E-01  | 0.95 (0.84-1.06) | 3.39E-01  | 0.37           | 0                     | 0.92 (0.80-1.06) | 1.02E-01      |  |
| rs28700987      | 11313500 | G/C       | 0.12 | 0.13    | I/I         | 0.87 (0.68-1.11)                  | 2.51E-01  | 0.92 (0.80-1.05) | 2.26E-01  | 0.68           | 0                     | 0.90 (0.76-1.07) | 1.02E-01      |  |
| rs936550        | 11410987 | C/A       | 0.17 | 0.16    | O/O         | 1.21 (0.97-1.51)                  | 8.50E-02  | 1.05 (0.93-1.19) | 3.97E-01  | 0.28           | 16                    | 1.10 (0.94-1.27) | 1.02E-01      |  |
| rs62489140      | 11399098 | C/T       | 0.12 | 0.13    | I/I         | 0.98 (0.77-1.25)                  | 8.77E-01  | 0.88 (0.77-1.01) | 6.74E-02  | 0.44           | 0                     | 0.91 (0.77-1.07) | 1.03E-01      |  |
| rs7014565       | 11396818 | C/T       | 0.12 | 0.14    | O/O         | 1.02 (0.81-1.30)                  | 8.37E-01  | 0.87 (0.75-0.99) | 3.98E-02  | 0.23           | 31                    | 0.91 (0.77-1.07) | 1.03E-01      |  |
| rs2618478       | 11356002 | A/C       | 0.15 | 0.16    | I/I         | 0.93 (0.74-1.17)                  | 5.32E-01  | 0.91 (0.80-1.03) | 1.26E-01  | 0.84           | 0                     | 0.91 (0.78-1.07) | 1.03E-01      |  |
| rs7839434       | 11325641 | C/G       | 0.20 | 0.21    | I/I         | 0.91 (0.74-1.11)                  | 3.46E-01  | 0.92 (0.82-1.04) | 1.83E-01  | 0.88           | 0                     | 0.92 (0.80-1.06) | 1.03E-01      |  |
| rs73207496      | 11288485 | T/G       | 0.20 | 0.21    | I/I         | 0.88 (0.72-1.08)                  | 2.23E-01  | 0.93 (0.83-1.05) | 2.49E-01  | 0.63           | 0                     | 0.92 (0.80-1.06) | 1.04E-01      |  |
| rs746411        | 11428699 | T/C       | 0.14 | 0.13    | I/I         | 1.09 (0.86-1.38)                  | 4.76E-01  | 1.10 (0.97-1.26) | 1.46E-01  | 0.93           | 0                     | 1.10 (0.94-1.29) | 1.07E-01      |  |

**Supplementary Table 10.** Association analysis in *BLK*

| SNP             | BP       | Alleles   |      | MAF     |             | Observed or Imputed in Dataset1/2 | Dataset 1 |                  | Dataset 2 |       | Test of heterogeneity |                  | Meta analysis |  |
|-----------------|----------|-----------|------|---------|-------------|-----------------------------------|-----------|------------------|-----------|-------|-----------------------|------------------|---------------|--|
|                 |          | maj / min | Case | Control | OR (95% CI) |                                   | P         | OR (95% CI)      | P         | $P_Q$ | $I^2$                 | OR (95% CI)      | P             |  |
| rs28625526      | 11406242 | C/A       | 0.04 | 0.04    | I/I         | 1.33 (0.89-1.98)                  | 1.64E-01  | 1.13 (0.89-1.43) | 3.03E-01  | 0.50  | 0                     | 1.18 (0.89-1.57) | 1.07E-01      |  |
| rs192643888     | 11424090 | A/C       | 0.02 | 0.01    | I/I         | 1.77 (0.92-3.40)                  | 8.69E-02  | 1.17 (0.80-1.72) | 4.10E-01  | 0.29  | 12                    | 1.32 (0.83-2.08) | 1.08E-01      |  |
| rs2736328       | 11332247 | G/A       | 0.10 | 0.11    | O/O         | 0.98 (0.75-1.28)                  | 8.83E-01  | 0.87 (0.75-1.01) | 7.12E-02  | 0.46  | 0                     | 0.90 (0.75-1.08) | 1.08E-01      |  |
| rs73209249      | 11313957 | A/G       | 0.20 | 0.21    | I/I         | 0.85 (0.69-1.04)                  | 1.14E-01  | 0.95 (0.85-1.06) | 3.65E-01  | 0.35  | 0                     | 0.92 (0.80-1.06) | 1.09E-01      |  |
| rs1564267       | 11337887 | C/T       | 0.15 | 0.16    | I/I         | 0.97 (0.77-1.22)                  | 7.92E-01  | 0.89 (0.79-1.01) | 8.50E-02  | 0.56  | 0                     | 0.91 (0.78-1.07) | 1.09E-01      |  |
| rs67539049      | 11307311 | G/A       | 0.20 | 0.21    | I/I         | 0.88 (0.72-1.08)                  | 2.15E-01  | 0.94 (0.84-1.05) | 2.70E-01  | 0.60  | 0                     | 0.92 (0.80-1.06) | 1.11E-01      |  |
| rs67932868      | 11303445 | G/A       | 0.20 | 0.21    | I/I         | 0.88 (0.72-1.07)                  | 1.99E-01  | 0.94 (0.84-1.05) | 2.85E-01  | 0.56  | 0                     | 0.92 (0.80-1.06) | 1.12E-01      |  |
| rs77487164      | 11326708 | A/T       | 0.20 | 0.21    | I/I         | 0.88 (0.72-1.08)                  | 2.20E-01  | 0.94 (0.84-1.05) | 2.69E-01  | 0.60  | 0                     | 0.92 (0.80-1.06) | 1.13E-01      |  |
| rs56138616      | 11287550 | A/G       | 0.20 | 0.21    | I/I         | 0.88 (0.72-1.08)                  | 2.19E-01  | 0.94 (0.84-1.05) | 2.75E-01  | 0.60  | 0                     | 0.92 (0.80-1.06) | 1.15E-01      |  |
| rs2306234       | 11414237 | C/T       | 0.16 | 0.15    | I/I         | 1.12 (0.89-1.40)                  | 3.36E-01  | 1.08 (0.96-1.22) | 2.09E-01  | 0.81  | 0                     | 1.09 (0.94-1.27) | 1.15E-01      |  |
| rs62489135      | 11393329 | A/C       | 0.12 | 0.13    | I/I         | 1.00 (0.79-1.27)                  | 9.97E-01  | 0.88 (0.77-1.01) | 6.31E-02  | 0.36  | 0                     | 0.91 (0.77-1.08) | 1.16E-01      |  |
| rs3021512       | 11301601 | G/C       | 0.20 | 0.21    | I/I         | 0.88 (0.72-1.07)                  | 2.07E-01  | 0.94 (0.84-1.05) | 2.96E-01  | 0.57  | 0                     | 0.92 (0.80-1.06) | 1.20E-01      |  |
| rs12115021      | 11289685 | A/G       | 0.17 | 0.18    | O/O         | 0.91 (0.73-1.12)                  | 3.68E-01  | 0.92 (0.82-1.04) | 2.04E-01  | 0.88  | 0                     | 0.92 (0.80-1.06) | 1.20E-01      |  |
| rs3021518       | 11296049 | T/A       | 0.20 | 0.21    | I/I         | 0.88 (0.72-1.08)                  | 2.18E-01  | 0.94 (0.84-1.05) | 3.02E-01  | 0.58  | 0                     | 0.92 (0.81-1.06) | 1.26E-01      |  |
| rs4841530       | 11289146 | C/A       | 0.12 | 0.13    | O/O         | 0.86 (0.67-1.10)                  | 2.29E-01  | 0.93 (0.81-1.06) | 2.94E-01  | 0.58  | 0                     | 0.91 (0.77-1.08) | 1.26E-01      |  |
| rs62489136      | 11393617 | G/C       | 0.12 | 0.13    | I/I         | 1.00 (0.79-1.27)                  | 9.90E-01  | 0.88 (0.77-1.01) | 6.99E-02  | 0.36  | 0                     | 0.91 (0.77-1.08) | 1.26E-01      |  |
| rs67684445      | 11297327 | C/T       | 0.20 | 0.21    | I/I         | 0.88 (0.72-1.07)                  | 1.95E-01  | 0.94 (0.84-1.06) | 3.28E-01  | 0.52  | 0                     | 0.92 (0.81-1.06) | 1.29E-01      |  |
| rs111689966     | 11389426 | G/A       | 0.12 | 0.13    | I/I         | 1.03 (0.81-1.31)                  | 8.26E-01  | 0.87 (0.76-1.00) | 5.39E-02  | 0.25  | 24                    | 0.91 (0.77-1.08) | 1.29E-01      |  |
| rs6984212       | 11290966 | T/C       | 0.13 | 0.14    | O/O         | 0.85 (0.67-1.07)                  | 1.73E-01  | 0.94 (0.82-1.07) | 3.51E-01  | 0.46  | 0                     | 0.91 (0.78-1.07) | 1.30E-01      |  |
| rs67350204      | 11300293 | A/G       | 0.20 | 0.21    | I/I         | 0.88 (0.72-1.07)                  | 2.04E-01  | 0.94 (0.84-1.06) | 3.24E-01  | 0.54  | 0                     | 0.92 (0.80-1.06) | 1.31E-01      |  |
| rs12114115      | 11298606 | G/A       | 0.13 | 0.14    | I/I         | 0.90 (0.71-1.15)                  | 3.94E-01  | 0.92 (0.80-1.05) | 2.12E-01  | 0.89  | 0                     | 0.91 (0.77-1.08) | 1.31E-01      |  |
| rs60320871      | 11297549 | C/G       | 0.20 | 0.21    | I/I         | 0.87 (0.71-1.07)                  | 1.81E-01  | 0.95 (0.84-1.06) | 3.47E-01  | 0.49  | 0                     | 0.92 (0.80-1.06) | 1.31E-01      |  |
| rs7846252       | 11289053 | C/T       | 0.12 | 0.13    | I/I         | 0.86 (0.67-1.10)                  | 2.21E-01  | 0.93 (0.81-1.07) | 3.12E-01  | 0.55  | 0                     | 0.91 (0.77-1.08) | 1.32E-01      |  |
| rs58373594      | 11390627 | A/T       | 0.12 | 0.13    | I/I         | 1.01 (0.80-1.29)                  | 9.06E-01  | 0.88 (0.77-1.01) | 6.41E-02  | 0.31  | 4                     | 0.92 (0.77-1.08) | 1.32E-01      |  |
| rs28478078      | 11288481 | A/C       | 0.02 | 0.02    | I/I         | 1.27 (0.68-2.38)                  | 4.60E-01  | 1.25 (0.90-1.75) | 1.90E-01  | 0.97  | 0                     | 1.26 (0.83-1.91) | 1.33E-01      |  |
| rs11776081      | 11431222 | G/A       | 0.14 | 0.13    | I/I         | 1.09 (0.86-1.38)                  | 4.80E-01  | 1.09 (0.96-1.24) | 1.89E-01  | 0.99  | 0                     | 1.09 (0.93-1.28) | 1.37E-01      |  |
| rs66934548      | 11304050 | C/A       | 0.20 | 0.21    | I/I         | 0.88 (0.72-1.07)                  | 1.99E-01  | 0.95 (0.84-1.06) | 3.43E-01  | 0.52  | 0                     | 0.93 (0.81-1.06) | 1.37E-01      |  |
| rs2618469       | 11359380 | A/G       | 0.14 | 0.15    | I/I         | 1.00 (0.79-1.25)                  | 9.69E-01  | 0.89 (0.79-1.01) | 8.44E-02  | 0.42  | 0                     | 0.92 (0.79-1.08) | 1.38E-01      |  |
| rs2736353       | 11367038 | T/C       | 0.14 | 0.15    | I/I         | 1.03 (0.82-1.29)                  | 7.85E-01  | 0.88 (0.78-1.00) | 5.48E-02  | 0.23  | 29                    | 0.92 (0.79-1.08) | 1.38E-01      |  |
| rs2252534       | 11384713 | A/C       | 0.22 | 0.23    | O/O         | 1.09 (0.91-1.31)                  | 3.53E-01  | 0.88 (0.79-0.98) | 2.05E-02  | 0.05  | 75                    | 0.93 (0.82-1.06) | 1.42E-01      |  |
| rs73546312      | 11302709 | G/A       | 0.20 | 0.21    | I/I         | 0.88 (0.72-1.07)                  | 1.99E-01  | 0.95 (0.85-1.06) | 3.56E-01  | 0.51  | 0                     | 0.93 (0.81-1.06) | 1.43E-01      |  |
| rs2736356       | 11370451 | T/C       | 0.14 | 0.16    | I/I         | 1.03 (0.83-1.29)                  | 7.60E-01  | 0.88 (0.78-1.00) | 5.50E-02  | 0.23  | 32                    | 0.92 (0.79-1.08) | 1.43E-01      |  |
| rs67526040      | 11302996 | G/A       | 0.20 | 0.21    | I/I         | 0.88 (0.72-1.07)                  | 1.99E-01  | 0.95 (0.85-1.06) | 3.61E-01  | 0.51  | 0                     | 0.93 (0.81-1.07) | 1.45E-01      |  |
| rs4240675       | 11297991 | G/A       | 0.13 | 0.14    | I/I         | 0.90 (0.70-1.14)                  | 3.73E-01  | 0.92 (0.81-1.06) | 2.47E-01  | 0.83  | 0                     | 0.92 (0.78-1.08) | 1.46E-01      |  |
| rs2001462       | 11294810 | C/T       | 0.20 | 0.21    | I/I         | 0.89 (0.73-1.08)                  | 2.41E-01  | 0.94 (0.84-1.06) | 3.33E-01  | 0.59  | 0                     | 0.93 (0.81-1.07) | 1.49E-01      |  |
| rs1382562       | 11426618 | G/A       | 0.03 | 0.03    | I/I         | 1.26 (0.80-1.97)                  | 3.17E-01  | 1.16 (0.88-1.51) | 2.86E-01  | 0.76  | 0                     | 1.19 (0.86-1.63) | 1.51E-01      |  |
| rs6982606       | 11287122 | T/G       | 0.13 | 0.14    | I/I         | 0.88 (0.70-1.12)                  | 3.09E-01  | 0.93 (0.81-1.06) | 2.91E-01  | 0.72  | 0                     | 0.92 (0.78-1.08) | 1.51E-01      |  |
| rs2736355       | 11369777 | C/T       | 0.15 | 0.16    | I/I         | 1.03 (0.82-1.28)                  | 8.24E-01  | 0.89 (0.78-1.01) | 6.69E-02  | 0.27  | 17                    | 0.93 (0.79-1.08) | 1.51E-01      |  |
| chr8:11305843:D | 11305843 | AG/A      | 0.20 | 0.21    | I/I         | 0.88 (0.72-1.07)                  | 2.05E-01  | 0.95 (0.85-1.06) | 3.70E-01  | 0.51  | 0                     | 0.93 (0.81-1.07) | 1.52E-01      |  |
| rs57240873      | 11390781 | C/G       | 0.12 | 0.13    | I/I         | 1.02 (0.80-1.29)                  | 8.80E-01  | 0.88 (0.77-1.01) | 7.44E-02  | 0.31  | 3                     | 0.92 (0.78-1.08) | 1.52E-01      |  |
| chr8:11321671:i | 11321671 | G/GC      | 0.20 | 0.21    | I/I         | 0.87 (0.71-1.06)                  | 1.64E-01  | 0.95 (0.85-1.07) | 4.19E-01  | 0.42  | 0                     | 0.93 (0.81-1.07) | 1.55E-01      |  |
| rs55764254      | 11294184 | A/G       | 0.20 | 0.21    | I/I         | 0.88 (0.72-1.07)                  | 2.11E-01  | 0.95 (0.85-1.06) | 3.74E-01  | 0.52  | 0                     | 0.93 (0.81-1.07) | 1.56E-01      |  |
| rs77865852      | 11303336 | A/G       | 0.20 | 0.21    | I/I         | 0.88 (0.72-1.07)                  | 2.08E-01  | 0.95 (0.85-1.06) | 3.81E-01  | 0.51  | 0                     | 0.93 (0.81-1.07) | 1.58E-01      |  |
| rs68063127      | 11303726 | G/C       | 0.20 | 0.21    | I/I         | 0.88 (0.72-1.07)                  | 1.99E-01  | 0.95 (0.85-1.07) | 3.92E-01  | 0.49  | 0                     | 0.93 (0.81-1.07) | 1.59E-01      |  |
| rs75819332      | 11441234 | G/T       | 0.04 | 0.04    | I/I         | 1.78 (1.23-2.58)                  | 2.18E-03  | 0.97 (0.77-1.23) | 7.94E-01  | 0.01  | 87                    | 1.15 (0.88-1.51) | 1.60E-01      |  |
| rs10102600      | 11285384 | T/C       | 0.15 | 0.16    | O/O         | 0.88 (0.70-1.10)                  | 2.60E-01  | 0.94 (0.83-1.07) | 3.43E-01  | 0.60  | 0                     | 0.92 (0.79-1.08) | 1.61E-01      |  |
| rs2244234       | 11336467 | G/T       | 0.14 | 0.16    | I/I         | 0.95 (0.75-1.21)                  | 6.88E-01  | 0.91 (0.80-1.04) | 1.63E-01  | 0.76  | 0                     | 0.92 (0.79-1.08) | 1.63E-01      |  |
| rs62490888      | 11418766 | G/A       | 0.14 | 0.13    | I/I         | 1.14 (0.90-1.43)                  | 2.84E-01  | 1.07 (0.94-1.22) | 3.29E-01  | 0.66  | 0                     | 1.09 (0.93-1.28) | 1.63E-01      |  |
| rs2618446       | 11381148 | A/C       | 0.21 | 0.23    | I/I         | 1.06 (0.88-1.27)                  | 5.68E-01  | 0.89 (0.80-1.00) | 4.52E-02  | 0.13  | 56                    | 0.94 (0.82-1.07) | 1.64E-01      |  |
| rs6601593       | 11326985 | T/C       | 0.03 | 0.03    | I/I         | 1.01 (0.60-1.70)                  | 9.82E-01  | 1.23 (0.96-1.57) | 1.06E-01  | 0.50  | 0                     | 1.16 (0.84-1.61) | 1.66E-01      |  |
| rs73207493      | 11285733 | C/T       | 0.20 | 0.21    | I/I         | 0.89 (0.72-1.09)                  | 2.52E-01  | 0.95 (0.85-1.06) | 3.60E-01  | 0.58  | 0                     | 0.93 (0.81-1.07) | 1.67E-01      |  |
| rs73195285      | 11405374 | T/G       | 0.15 | 0.14    | I/I         | 1.14 (0.90-1.43)                  | 2.75E-01  | 1.06 (0.93-1.21) | 3.45E-01  | 0.63  | 0                     | 1.08 (0.93-1.27) | 1.68E-01      |  |
| rs56388647      | 11295084 | T/C       | 0.20 | 0.21    | I/I         | 0.88 (0.72-1.07)                  | 2.11E-01  | 0.95 (0.85-1.07) | 4.01E-01  | 0.50  | 0                     | 0.93 (0.81-1.07) | 1.69E-01      |  |
| rs75153348      | 11364985 | C/T       | 0.09 | 0.08    | I/I         | 1.16 (0.85-1.59)                  | 3.37E-01  | 1.09 (0.93-1.27) | 3.06E-01  | 0.70  | 0                     | 1.11 (0.91-1.35) | 1.69E-01      |  |
| rs4841540       | 11309507 | G/T       | 0.13 | 0.14    | I/I         | 0.89 (0.70-1.14)                  | 3.64E-01  | 0.93 (0.81-1.06) | 2.93E-01  | 0.78  | 0                     | 0.92 (0.78-1.09) | 1.70E-01      |  |
| rs73209223      | 11304944 | A/G       | 0.20 | 0.21    | I/I         | 0.88 (0.72-1.07)                  | 2.10E-01  | 0.95 (0.85-1.07) | 4.05E-01  | 0.50  | 0                     | 0.93 (0.81-1.07) | 1.70E-01      |  |
| rs10903338      | 11310290 | C/T       | 0.13 | 0.14    | O/O         | 0.87 (0.69-1.11)                  | 2.60E-01  | 0.94 (0.82-1.07) | 3.65E-01  | 0.59  | 0                     | 0.92 (0.78-1.08) | 1.72E-01      |  |
| rs146329048     | 11293135 | C/G       | 0.02 | 0.02    | I/I         | 1.26 (0.67-2.36)                  | 4.75E-01  | 1.22 (0.87-1.72) | 2.46E-01  | 0.94  | 0                     | 1.23 (0.81-1.88) | 1.73E-01      |  |
| rs7832089       | 11306003 | C/A       | 0.20 | 0.21    | I/I         | 0.88 (0.72-1.07)                  | 2.01E-01  | 0.95 (0.85-1.07) | 4.22E-01  | 0.48  | 0                     | 0.93 (0.81-1.07) | 1.74E-01      |  |
| rs6981617       | 11397583 | C/T       | 0.12 | 0.13    | I/I         | 1.01 (0.80-1.29)                  | 9.26E-01  | 0.89 (0.78-1.02) | 9.71E-02  | 0.36  | 0                     | 0.92 (0.78-1.09) | 1.75E-01      |  |
| rs2618456       | 11370733 | C/G       | 0.14 | 0.15    | I/I         | 1.03 (0.82-1.29)                  | 7.88E-01  | 0.89 (0.78-1.01) | 7.73E-02  | 0.27  | 18                    | 0.93 (0.80-1.08) | 1.76E-01      |  |
| rs10107563      | 11427492 | G/A       | 0.03 | 0.03    | O/O         | 1.40 (0.92-2.13)                  | 1.17E-01  | 1.09 (0.83-1.42) | 5.52E-01  | 0.32  | 0                     | 1.17 (0.85-1.60) | 1.81E-01      |  |
| rs77905676      | 11291293 | G/A       | 0.02 | 0.02    | I/I         | 1.26 (0.69-2.33)                  | 4.53E-01  | 1.20 (0.87-1.67) | 2.72E-01  | 0.89  | 0                     | 1.22 (0.81-1.83) | 1.84E-01      |  |
| rs151035713     | 11313189 | G/A       | 0.02 | 0.02    | I/I         | 1.27 (0.70-2.30)                  | 4.26E-01  | 1.20 (0.86-1.66) | 2.85E-01  | 0.86  | 0                     | 1.22 (0.81-1.82) | 1.84E-01      |  |
| rs80327577      | 11408820 | C/T       | 0.02 | 0.01    | I/I         | 1.29 (0.67-2.48)                  | 4.48E-01  | 1.22 (0.85-1.76) | 2.77E-01  | 0.89  | 0                     | 1.24 (0.79-1.94) | 1.86E-01      |  |
| rs143175355     | 11389725 | T/A       | 0.01 | 0.01    | I/I         | 0.97 (0.47-1.99)                  | 9.40E-01  | 0.71 (0.45-1.11) | 1.30E-01  | 0.46  | 0                     | 0.77 (0.46-1.31) | 1.86E-01      |  |
| rs62490890      | 11421254 | C/T       | 0.14 | 0.13    | I/I         | 1.12 (0.89-1.41)                  | 3.46E-01  | 1.07 (0.93-1.22) | 3.38E-01  | 0.73  | 0                     | 1.08 (0.92-1.27) | 1.90E-01      |  |

Supplementary Table 10. Association analysis in *BLK*

| SNP             | BP       | Alleles   |      | MAF     |             | Observed or Imputed in Dataset1/2 | Dataset 1 |                  | Dataset 2 |                | Test of heterogeneity |                  | Meta analysis |  |
|-----------------|----------|-----------|------|---------|-------------|-----------------------------------|-----------|------------------|-----------|----------------|-----------------------|------------------|---------------|--|
|                 |          | maj / min | Case | Control | OR (95% CI) |                                   | P         | OR (95% CI)      | P         | P <sub>Q</sub> | I <sup>2</sup>        | OR (95% CI)      | P             |  |
|                 |          |           |      |         |             |                                   |           |                  |           |                |                       |                  |               |  |
| rs10094362      | 11423381 | T/G       | 0.14 | 0.13    | I/I         | 1.08 (0.85-1.36)                  | 5.44E-01  | 1.08 (0.95-1.23) | 2.43E-01  | 0.97           | 0                     | 1.08 (0.92-1.27) | 1.90E-01      |  |
| rs138388323     | 11449764 | T/G       | 0.01 | 0.01    | I/I         | 1.55 (0.80-3.02)                  | 1.92E-01  | 1.15 (0.78-1.70) | 4.76E-01  | 0.44           | 0                     | 1.25 (0.79-2.00) | 1.94E-01      |  |
| rs77314514      | 11451467 | G/A       | 0.04 | 0.04    | I/I         | 1.63 (1.13-2.35)                  | 8.94E-03  | 0.99 (0.78-1.25) | 9.07E-01  | 0.02           | 80                    | 1.14 (0.86-1.50) | 1.97E-01      |  |
| rs140788526     | 11287218 | C/T       | 0.02 | 0.02    | I/I         | 1.20 (0.63-2.30)                  | 5.78E-01  | 1.23 (0.87-1.74) | 2.41E-01  | 0.95           | 0                     | 1.22 (0.79-1.88) | 1.98E-01      |  |
| rs7018402       | 11293035 | C/A       | 0.13 | 0.14    | I/I         | 0.89 (0.70-1.13)                  | 3.29E-01  | 0.94 (0.82-1.07) | 3.66E-01  | 0.68           | 0                     | 0.92 (0.78-1.09) | 1.99E-01      |  |
| rs73663146      | 11303373 | G/C       | 0.02 | 0.02    | I/I         | 1.40 (0.79-2.47)                  | 2.44E-01  | 1.13 (0.83-1.55) | 4.33E-01  | 0.52           | 0                     | 1.20 (0.82-1.77) | 1.99E-01      |  |
| chr8:11462827:D | 11462827 | AAAAG/A   | 0.04 | 0.04    | I/I         | 1.67 (1.17-2.39)                  | 5.10E-03  | 0.97 (0.76-1.23) | 8.07E-01  | 0.01           | 84                    | 1.13 (0.86-1.49) | 2.01E-01      |  |
| rs114655325     | 11307238 | C/T       | 0.02 | 0.02    | I/I         | 1.29 (0.72-2.29)                  | 3.91E-01  | 1.17 (0.85-1.60) | 3.33E-01  | 0.77           | 0                     | 1.20 (0.81-1.77) | 2.02E-01      |  |
| rs73663144      | 11298149 | T/G       | 0.02 | 0.02    | I/I         | 1.40 (0.79-2.46)                  | 2.48E-01  | 1.13 (0.83-1.55) | 4.34E-01  | 0.53           | 0                     | 1.20 (0.82-1.76) | 2.02E-01      |  |
| rs2252729       | 11368219 | G/A       | 0.15 | 0.16    | I/I         | 1.04 (0.83-1.30)                  | 7.27E-01  | 0.90 (0.79-1.02) | 8.61E-02  | 0.25           | 25                    | 0.93 (0.80-1.09) | 2.04E-01      |  |
| rs10093314      | 11426113 | T/C       | 0.03 | 0.03    | O/O         | 1.34 (0.88-2.04)                  | 1.79E-01  | 1.09 (0.83-1.44) | 5.12E-01  | 0.44           | 0                     | 1.16 (0.85-1.59) | 2.05E-01      |  |
| rs142399055     | 11297695 | G/A       | 0.02 | 0.02    | I/I         | 1.28 (0.71-2.31)                  | 4.13E-01  | 1.17 (0.85-1.61) | 3.27E-01  | 0.79           | 0                     | 1.20 (0.81-1.78) | 2.06E-01      |  |
| rs74317011      | 11389064 | G/A       | 0.01 | 0.01    | I/I         | 0.97 (0.47-2.00)                  | 9.40E-01  | 0.72 (0.46-1.13) | 1.50E-01  | 0.48           | 0                     | 0.78 (0.46-1.32) | 2.07E-01      |  |
| rs76160649      | 11389077 | G/T       | 0.01 | 0.01    | I/I         | 0.97 (0.47-2.00)                  | 9.40E-01  | 0.72 (0.46-1.13) | 1.50E-01  | 0.48           | 0                     | 0.78 (0.46-1.32) | 2.07E-01      |  |
| rs2618461       | 11365692 | T/C       | 0.02 | 0.01    | O/O         | 1.59 (0.86-2.94)                  | 1.38E-01  | 1.12 (0.75-1.66) | 5.78E-01  | 0.34           | 0                     | 1.23 (0.78-1.95) | 2.08E-01      |  |
| rs78993441      | 11407039 | A/C       | 0.01 | 0.02    | I/I         | 1.03 (0.51-2.05)                  | 9.40E-01  | 0.73 (0.48-1.09) | 1.27E-01  | 0.40           | 0                     | 0.80 (0.49-1.31) | 2.10E-01      |  |
| rs142135659     | 11285537 | C/G       | 0.02 | 0.02    | I/I         | 1.20 (0.63-2.30)                  | 5.78E-01  | 1.22 (0.86-1.72) | 2.61E-01  | 0.97           | 0                     | 1.21 (0.79-1.87) | 2.12E-01      |  |
| rs117262908     | 11305770 | G/C       | 0.02 | 0.02    | I/I         | 0.75 (0.38-1.47)                  | 4.05E-01  | 0.86 (0.62-1.18) | 3.44E-01  | 0.73           | 0                     | 0.83 (0.54-1.26) | 2.14E-01      |  |
| rs11781239      | 11271200 | G/A       | 0.07 | 0.07    | I/I         | 0.79 (0.56-1.12)                  | 1.84E-01  | 0.94 (0.79-1.13) | 5.29E-01  | 0.38           | 0                     | 0.90 (0.72-1.13) | 2.15E-01      |  |
| rs11776201      | 11420898 | A/G       | 0.03 | 0.02    | I/I         | 1.26 (0.79-2.00)                  | 3.33E-01  | 1.13 (0.85-1.51) | 3.94E-01  | 0.71           | 0                     | 1.17 (0.83-1.63) | 2.16E-01      |  |
| chr8:11285629:D | 11285629 | TA/T      | 0.31 | 0.32    | I/I         | 0.93 (0.78-1.12)                  | 4.47E-01  | 0.95 (0.86-1.05) | 3.25E-01  | 0.85           | 0                     | 0.95 (0.84-1.07) | 2.16E-01      |  |
| rs2618463       | 11364138 | A/G       | 0.02 | 0.01    | O/O         | 1.51 (0.82-2.79)                  | 1.83E-01  | 1.13 (0.76-1.68) | 5.37E-01  | 0.43           | 0                     | 1.23 (0.78-1.94) | 2.18E-01      |  |
| rs146551707     | 11287245 | G/T       | 0.02 | 0.02    | I/I         | 1.20 (0.63-2.30)                  | 5.78E-01  | 1.21 (0.86-1.71) | 2.71E-01  | 0.98           | 0                     | 1.21 (0.79-1.86) | 2.20E-01      |  |
| rs56004143      | 11304793 | C/T       | 0.02 | 0.02    | I/I         | 1.29 (0.73-2.30)                  | 3.80E-01  | 1.16 (0.84-1.60) | 3.76E-01  | 0.74           | 0                     | 1.19 (0.80-1.77) | 2.24E-01      |  |
| rs11786268      | 11424192 | C/T       | 0.14 | 0.13    | I/I         | 1.06 (0.84-1.35)                  | 6.02E-01  | 1.08 (0.94-1.23) | 2.68E-01  | 0.93           | 0                     | 1.07 (0.91-1.26) | 2.24E-01      |  |
| rs77519780      | 11294800 | G/A       | 0.02 | 0.02    | I/I         | 1.30 (0.71-2.41)                  | 3.96E-01  | 1.15 (0.84-1.58) | 3.77E-01  | 0.72           | 0                     | 1.19 (0.80-1.78) | 2.30E-01      |  |
| rs10093575      | 11426322 | C/T       | 0.14 | 0.13    | I/I         | 1.08 (0.85-1.37)                  | 5.31E-01  | 1.07 (0.94-1.23) | 3.06E-01  | 0.96           | 0                     | 1.07 (0.91-1.26) | 2.31E-01      |  |
| rs79034086      | 11388142 | T/G       | 0.01 | 0.01    | I/I         | 1.01 (0.49-2.08)                  | 9.78E-01  | 0.72 (0.46-1.13) | 1.52E-01  | 0.43           | 0                     | 0.79 (0.47-1.34) | 2.31E-01      |  |
| rs114739497     | 11312479 | C/A       | 0.02 | 0.02    | I/I         | 1.24 (0.69-2.24)                  | 4.72E-01  | 1.17 (0.85-1.60) | 3.40E-01  | 0.85           | 0                     | 1.19 (0.80-1.76) | 2.34E-01      |  |
| rs57738273      | 11290939 | G/C       | 0.02 | 0.02    | I/I         | 1.34 (0.72-2.48)                  | 3.53E-01  | 1.15 (0.82-1.61) | 4.13E-01  | 0.67           | 0                     | 1.20 (0.79-1.82) | 2.35E-01      |  |
| rs60838274      | 11299076 | G/A       | 0.02 | 0.02    | I/I         | 1.40 (0.79-2.47)                  | 2.44E-01  | 1.11 (0.81-1.53) | 5.03E-01  | 0.49           | 0                     | 1.19 (0.81-1.75) | 2.36E-01      |  |
| rs116028542     | 11312478 | G/A       | 0.02 | 0.02    | I/I         | 1.24 (0.69-2.24)                  | 4.72E-01  | 1.17 (0.85-1.60) | 3.44E-01  | 0.85           | 0                     | 1.19 (0.80-1.76) | 2.36E-01      |  |
| rs17153280      | 11298491 | T/A       | 0.02 | 0.02    | I/I         | 1.40 (0.79-2.46)                  | 2.48E-01  | 1.11 (0.81-1.53) | 5.01E-01  | 0.49           | 0                     | 1.19 (0.81-1.75) | 2.37E-01      |  |
| rs13832297      | 11296843 | C/T       | 0.02 | 0.02    | I/I         | 1.25 (0.69-2.25)                  | 4.64E-01  | 1.16 (0.85-1.60) | 3.48E-01  | 0.84           | 0                     | 1.19 (0.80-1.76) | 2.37E-01      |  |
| rs2618457       | 11369177 | G/A       | 0.15 | 0.16    | I/I         | 1.04 (0.83-1.30)                  | 7.57E-01  | 0.90 (0.79-1.02) | 1.14E-01  | 0.29           | 9                     | 0.94 (0.80-1.10) | 2.39E-01      |  |
| rs73531756      | 11467168 | G/C       | 0.04 | 0.04    | I/I         | 1.61 (1.10-2.36)                  | 1.33E-02  | 0.98 (0.76-1.26) | 8.61E-01  | 0.03           | 79                    | 1.13 (0.85-1.51) | 2.41E-01      |  |
| rs138554715     | 11324048 | C/T       | 0.02 | 0.02    | I/I         | 1.24 (0.68-2.23)                  | 4.82E-01  | 1.17 (0.84-1.63) | 3.47E-01  | 0.88           | 0                     | 1.19 (0.79-1.78) | 2.42E-01      |  |
| rs60493532      | 11304963 | G/A       | 0.02 | 0.02    | I/I         | 1.29 (0.72-2.29)                  | 3.87E-01  | 1.14 (0.83-1.57) | 4.04E-01  | 0.72           | 0                     | 1.18 (0.80-1.75) | 2.43E-01      |  |
| rs4629826       | 11367037 | G/C       | 0.09 | 0.08    | I/I         | 1.16 (0.86-1.58)                  | 3.26E-01  | 1.06 (0.91-1.24) | 4.66E-01  | 0.60           | 0                     | 1.09 (0.89-1.33) | 2.55E-01      |  |
| rs77738736      | 11466779 | T/C       | 0.04 | 0.04    | I/I         | 1.55 (1.08-2.23)                  | 1.73E-02  | 0.98 (0.77-1.25) | 8.74E-01  | 0.04           | 76                    | 1.12 (0.85-1.48) | 2.55E-01      |  |
| rs117473353     | 11458190 | G/A       | 0.04 | 0.04    | I/I         | 1.57 (1.10-2.25)                  | 1.28E-02  | 0.97 (0.76-1.24) | 8.21E-01  | 0.03           | 79                    | 1.12 (0.85-1.47) | 2.56E-01      |  |
| rs73197313      | 11423143 | A/T       | 0.14 | 0.13    | I/I         | 1.06 (0.83-1.34)                  | 6.50E-01  | 1.07 (0.94-1.23) | 2.92E-01  | 0.91           | 0                     | 1.07 (0.91-1.26) | 2.57E-01      |  |
| rs61707317      | 11300061 | A/T       | 0.02 | 0.02    | I/I         | 1.40 (0.79-2.46)                  | 2.49E-01  | 1.10 (0.81-1.51) | 5.40E-01  | 0.48           | 0                     | 1.18 (0.80-1.73) | 2.58E-01      |  |
| rs7002570       | 11393975 | C/G       | 0.04 | 0.04    | I/I         | 1.16 (0.79-1.69)                  | 4.42E-01  | 0.79 (0.61-1.02) | 6.92E-02  | 0.10           | 63                    | 0.88 (0.66-1.18) | 2.58E-01      |  |
| rs79711489      | 11298819 | C/T       | 0.02 | 0.02    | I/I         | 1.25 (0.69-2.26)                  | 4.55E-01  | 1.15 (0.84-1.58) | 3.88E-01  | 0.80           | 0                     | 1.18 (0.79-1.75) | 2.59E-01      |  |
| rs6998356       | 11293398 | G/A       | 0.02 | 0.02    | I/I         | 1.33 (0.74-2.42)                  | 3.43E-01  | 1.13 (0.81-1.58) | 4.62E-01  | 0.64           | 0                     | 1.19 (0.79-1.78) | 2.60E-01      |  |
| rs12543308      | 11308793 | G/C       | 0.14 | 0.15    | I/I         | 0.89 (0.70-1.12)                  | 3.13E-01  | 0.96 (0.84-1.09) | 4.87E-01  | 0.58           | 0                     | 0.93 (0.80-1.10) | 2.61E-01      |  |
| rs78789099      | 11405852 | C/A       | 0.01 | 0.01    | I/I         | 1.87 (0.99-3.55)                  | 5.37E-02  | 1.02 (0.69-1.52) | 9.15E-01  | 0.11           | 60                    | 1.21 (0.76-1.93) | 2.64E-01      |  |
| rs11779184      | 11424085 | G/T       | 0.14 | 0.13    | I/I         | 1.07 (0.84-1.35)                  | 5.95E-01  | 1.07 (0.94-1.22) | 3.26E-01  | 0.98           | 0                     | 1.07 (0.91-1.26) | 2.65E-01      |  |
| rs141618524     | 11290820 | C/T       | 0.02 | 0.02    | I/I         | 1.29 (0.69-2.43)                  | 4.27E-01  | 1.15 (0.82-1.62) | 4.14E-01  | 0.75           | 0                     | 1.19 (0.78-1.82) | 2.65E-01      |  |
| rs74659020      | 11464700 | G/C       | 0.04 | 0.04    | I/I         | 1.60 (1.12-2.28)                  | 1.04E-02  | 0.96 (0.76-1.22) | 7.54E-01  | 0.02           | 81                    | 1.11 (0.85-1.46) | 2.70E-01      |  |
| rs7017352       | 11402224 | C/G       | 0.01 | 0.01    | I/I         | 1.31 (0.64-2.66)                  | 4.63E-01  | 1.18 (0.80-1.75) | 4.03E-01  | 0.81           | 0                     | 1.22 (0.75-1.97) | 2.72E-01      |  |
| rs79620884      | 11464241 | C/T       | 0.04 | 0.04    | I/I         | 1.57 (1.09-2.25)                  | 1.45E-02  | 0.97 (0.76-1.24) | 8.08E-01  | 0.03           | 79                    | 1.11 (0.85-1.46) | 2.72E-01      |  |
| rs6601589       | 11310784 | G/C       | 0.25 | 0.26    | I/I         | 0.97 (0.80-1.17)                  | 7.39E-01  | 0.94 (0.85-1.05) | 2.85E-01  | 0.82           | 0                     | 0.95 (0.84-1.08) | 2.79E-01      |  |
| rs77358795      | 11392510 | C/T       | 0.01 | 0.01    | I/I         | 0.97 (0.47-1.99)                  | 9.38E-01  | 0.76 (0.49-1.18) | 2.20E-01  | 0.56           | 0                     | 0.81 (0.48-1.37) | 2.79E-01      |  |
| rs58004460      | 11313958 | G/C       | 0.25 | 0.26    | I/I         | 0.98 (0.81-1.18)                  | 8.36E-01  | 0.94 (0.85-1.05) | 2.56E-01  | 0.70           | 0                     | 0.95 (0.84-1.08) | 2.83E-01      |  |
| rs74612972      | 11465518 | T/G       | 0.04 | 0.04    | I/I         | 1.60 (1.12-2.28)                  | 1.06E-02  | 0.96 (0.75-1.22) | 7.30E-01  | 0.02           | 81                    | 1.11 (0.84-1.46) | 2.84E-01      |  |
| rs76806252      | 11465849 | A/G       | 0.04 | 0.04    | I/I         | 1.58 (1.10-2.26)                  | 1.31E-02  | 0.96 (0.76-1.23) | 7.65E-01  | 0.03           | 80                    | 1.11 (0.84-1.46) | 2.85E-01      |  |
| rs10089219      | 11419592 | T/C       | 0.03 | 0.03    | I/I         | 1.26 (0.81-1.95)                  | 3.10E-01  | 1.09 (0.83-1.44) | 5.43E-01  | 0.59           | 0                     | 1.13 (0.82-1.57) | 2.92E-01      |  |
| rs11776029      | 11268661 | A/G       | 0.06 | 0.07    | I/I         | 0.78 (0.55-1.11)                  | 1.68E-01  | 0.97 (0.80-1.16) | 7.11E-01  | 0.30           | 8                     | 0.91 (0.72-1.15) | 2.96E-01      |  |
| rs146738087     | 11368329 | C/A       | 0.01 | 0.01    | I/I         | 1.41 (0.73-2.73)                  | 3.10E-01  | 1.14 (0.75-1.73) | 5.51E-01  | 0.59           | 0                     | 1.21 (0.74-1.97) | 2.96E-01      |  |
| rs2409766       | 11303786 | C/A       | 0.13 | 0.14    | I/I         | 0.87 (0.69-1.11)                  | 2.57E-01  | 0.97 (0.85-1.10) | 6.06E-01  | 0.46           | 0                     | 0.94 (0.80-1.10) | 2.99E-01      |  |
| rs11780298      | 11270305 | G/A       | 0.07 | 0.07    | I/I         | 0.80 (0.57-1.12)                  | 1.99E-01  | 0.96 (0.81-1.15) | 6.78E-01  | 0.35           | 0                     | 0.91 (0.73-1.14) | 3.02E-01      |  |
| rs62490891      | 11422425 | A/T       | 0.14 | 0.13    | I/I         | 1.06 (0.84-1.35)                  | 6.24E-01  | 1.06 (0.93-1.22) | 3.66E-01  | 0.98           | 0                     | 1.06 (0.90-1.25) | 3.05E-01      |  |
| rs75473987      | 11384537 | T/C       | 0.01 | 0.02    | I/I         | 0.84 (0.43-1.64)                  | 6.01E-01  | 0.84 (0.56-1.25) | 3.85E-01  | 0.99           | 0                     | 0.84 (0.52-1.35) | 3.11E-01      |  |
| rs77714106      | 11435322 | G/A       | 0.01 | 0.01    | I/I         | 1.00 (0.47-2.13)                  | 9.96E-01  | 0.74 (0.46-1.21) | 2.34E-01  | 0.52           | 0                     | 0.81 (0.46-1.42) | 3.12E-01      |  |
| rs62490893      | 11423518 | G/A       | 0.14 | 0.13    | I/I         | 1.06 (0.84-1.35)                  | 6.01E-01  | 1.06 (0.93-1.21) | 3.87E-01  | 0.97           | 0                     | 1.06 (0.90-1.25) | 3.12E-01      |  |

**Supplementary Table 10.** Association analysis in *BLK*

| SNP             | BP       | Alleles   |      | MAF     |             | Observed or Imputed in Dataset1/2 | Dataset 1 |                  | Dataset 2 |       | Test of heterogeneity |                  | Meta analysis |  |
|-----------------|----------|-----------|------|---------|-------------|-----------------------------------|-----------|------------------|-----------|-------|-----------------------|------------------|---------------|--|
|                 |          | maj / min | Case | Control | OR (95% CI) |                                   | P         | OR (95% CI)      | P         | $P_Q$ | $I^2$                 | OR (95% CI)      | P             |  |
| chr8:11338267:D | 11338267 | TG/T      | 0.03 | 0.02    | I/I         | 1.39 (0.85-2.30)                  | 1.92E-01  | 1.06 (0.79-1.42) | 7.07E-01  | 0.35  | 0                     | 1.14 (0.80-1.63) | 3.13E-01      |  |
| rs2618460       | 11368325 | A/C       | 0.03 | 0.04    | I/I         | 0.98 (0.60-1.59)                  | 9.26E-01  | 0.87 (0.68-1.11) | 2.72E-01  | 0.68  | 0                     | 0.90 (0.66-1.23) | 3.27E-01      |  |
| rs7007575       | 11330495 | G/T       | 0.02 | 0.02    | I/I         | 1.10 (0.59-2.04)                  | 7.67E-01  | 1.16 (0.86-1.57) | 3.33E-01  | 0.88  | 0                     | 1.14 (0.77-1.69) | 3.28E-01      |  |
| rs4840561       | 11306460 | A/G       | 0.13 | 0.14    | I/I         | 0.88 (0.69-1.12)                  | 2.96E-01  | 0.97 (0.85-1.10) | 6.18E-01  | 0.50  | 0                     | 0.94 (0.80-1.11) | 3.28E-01      |  |
| rs80012649      | 11462865 | T/C       | 0.04 | 0.04    | I/I         | 1.56 (1.09-2.23)                  | 1.40E-02  | 0.95 (0.75-1.21) | 6.90E-01  | 0.02  | 80                    | 1.10 (0.83-1.44) | 3.30E-01      |  |
| rs4624992       | 11291597 | G/A       | 0.02 | 0.02    | O/O         | 1.23 (0.67-2.27)                  | 4.99E-01  | 1.13 (0.81-1.57) | 4.70E-01  | 0.80  | 0                     | 1.16 (0.77-1.74) | 3.31E-01      |  |
| rs111697900     | 11318875 | G/A       | 0.03 | 0.03    | I/I         | 1.00 (0.61-1.65)                  | 9.95E-01  | 1.16 (0.90-1.50) | 2.58E-01  | 0.61  | 0                     | 1.11 (0.80-1.54) | 3.36E-01      |  |
| rs732947        | 11429147 | G/A       | 0.14 | 0.13    | O/O         | 1.03 (0.82-1.31)                  | 7.80E-01  | 1.07 (0.93-1.22) | 3.41E-01  | 0.82  | 0                     | 1.06 (0.90-1.24) | 3.39E-01      |  |
| rs143089210     | 11401503 | G/A       | 0.02 | 0.03    | I/I         | 1.15 (0.69-1.92)                  | 6.00E-01  | 0.80 (0.60-1.08) | 1.46E-01  | 0.24  | 28                    | 0.89 (0.62-1.27) | 3.40E-01      |  |
| rs77031471      | 11459334 | C/T       | 0.04 | 0.04    | I/I         | 1.56 (1.09-2.22)                  | 1.41E-02  | 0.95 (0.75-1.21) | 6.72E-01  | 0.02  | 81                    | 1.09 (0.83-1.44) | 3.41E-01      |  |
| rs74705617      | 11466907 | A/G       | 0.04 | 0.04    | I/I         | 1.55 (1.08-2.23)                  | 1.73E-02  | 0.95 (0.74-1.22) | 7.00E-01  | 0.03  | 79                    | 1.10 (0.83-1.45) | 3.44E-01      |  |
| rs7824090       | 11322777 | G/A       | 0.03 | 0.03    | I/I         | 1.03 (0.63-1.68)                  | 9.06E-01  | 1.14 (0.89-1.47) | 2.99E-01  | 0.71  | 0                     | 1.11 (0.81-1.53) | 3.45E-01      |  |
| rs75908053      | 11396257 | G/A       | 0.01 | 0.01    | I/I         | 1.07 (0.54-2.14)                  | 8.44E-01  | 0.76 (0.49-1.18) | 2.16E-01  | 0.41  | 0                     | 0.83 (0.50-1.39) | 3.45E-01      |  |
| rs79939738      | 11384823 | T/A       | 0.01 | 0.01    | I/I         | 1.05 (0.51-2.16)                  | 9.00E-01  | 0.76 (0.48-1.20) | 2.34E-01  | 0.46  | 0                     | 0.83 (0.49-1.41) | 3.47E-01      |  |
| rs78723545      | 11384595 | C/T       | 0.01 | 0.01    | I/I         | 1.05 (0.51-2.16)                  | 9.02E-01  | 0.76 (0.48-1.20) | 2.35E-01  | 0.46  | 0                     | 0.83 (0.49-1.41) | 3.47E-01      |  |
| rs118031156     | 11456485 | C/T       | 0.04 | 0.04    | I/I         | 1.54 (1.08-2.21)                  | 1.82E-02  | 0.95 (0.75-1.21) | 7.05E-01  | 0.03  | 79                    | 1.09 (0.83-1.44) | 3.48E-01      |  |
| rs2618448       | 11379041 | A/C       | 0.17 | 0.18    | I/I         | 0.99 (0.80-1.23)                  | 9.33E-01  | 0.94 (0.83-1.06) | 2.97E-01  | 0.66  | 0                     | 0.95 (0.82-1.10) | 3.53E-01      |  |
| rs75458094      | 11462540 | A/G       | 0.04 | 0.04    | I/I         | 1.56 (1.09-2.23)                  | 1.40E-02  | 0.94 (0.74-1.20) | 6.39E-01  | 0.02  | 81                    | 1.09 (0.83-1.43) | 3.60E-01      |  |
| rs58319820      | 11308496 | C/A       | 0.22 | 0.23    | I/I         | 0.90 (0.74-1.10)                  | 3.18E-01  | 0.98 (0.87-1.09) | 6.52E-01  | 0.51  | 0                     | 0.95 (0.84-1.09) | 3.62E-01      |  |
| rs79846785      | 11383651 | T/C       | 0.01 | 0.01    | I/I         | 1.05 (0.51-2.16)                  | 8.97E-01  | 0.77 (0.49-1.21) | 2.49E-01  | 0.47  | 0                     | 0.84 (0.49-1.42) | 3.64E-01      |  |
| rs115288303     | 11398304 | G/C       | 0.01 | 0.01    | I/I         | 1.07 (0.54-2.15)                  | 8.40E-01  | 0.76 (0.49-1.19) | 2.32E-01  | 0.42  | 0                     | 0.84 (0.50-1.40) | 3.65E-01      |  |
| rs74333269      | 11398609 | T/C       | 0.01 | 0.01    | I/I         | 1.07 (0.54-2.15)                  | 8.40E-01  | 0.76 (0.49-1.19) | 2.32E-01  | 0.42  | 0                     | 0.84 (0.50-1.40) | 3.65E-01      |  |
| rs75745277      | 11398604 | G/C       | 0.01 | 0.01    | I/I         | 1.07 (0.54-2.15)                  | 8.40E-01  | 0.76 (0.49-1.19) | 2.32E-01  | 0.42  | 0                     | 0.84 (0.50-1.40) | 3.65E-01      |  |
| rs73207498      | 11289031 | T/C       | 0.19 | 0.20    | I/I         | 0.95 (0.78-1.17)                  | 6.42E-01  | 0.96 (0.85-1.07) | 4.37E-01  | 0.98  | 0                     | 0.95 (0.83-1.10) | 3.65E-01      |  |
| rs74961098      | 11400479 | C/A       | 0.01 | 0.01    | I/I         | 1.07 (0.54-2.15)                  | 8.40E-01  | 0.76 (0.49-1.19) | 2.36E-01  | 0.42  | 0                     | 0.84 (0.50-1.41) | 3.69E-01      |  |
| rs74383105      | 11457930 | C/G       | 0.04 | 0.04    | I/I         | 1.56 (1.09-2.23)                  | 1.38E-02  | 0.94 (0.74-1.20) | 6.21E-01  | 0.02  | 81                    | 1.09 (0.83-1.43) | 3.70E-01      |  |
| rs73541742      | 11395719 | A/G       | 0.01 | 0.01    | I/I         | 1.07 (0.54-2.15)                  | 8.40E-01  | 0.77 (0.50-1.19) | 2.37E-01  | 0.42  | 0                     | 0.85 (0.51-1.40) | 3.71E-01      |  |
| rs56284862      | 11461588 | C/G       | 0.04 | 0.04    | I/I         | 1.53 (1.07-2.20)                  | 1.96E-02  | 0.95 (0.75-1.21) | 6.76E-01  | 0.03  | 79                    | 1.09 (0.83-1.43) | 3.73E-01      |  |
| rs2002030       | 11276542 | T/C       | 0.07 | 0.07    | O/O         | 0.86 (0.62-1.18)                  | 3.48E-01  | 0.96 (0.80-1.15) | 6.48E-01  | 0.55  | 0                     | 0.93 (0.74-1.16) | 3.76E-01      |  |
| rs4841565       | 11428348 | A/G       | 0.15 | 0.14    | I/I         | 1.09 (0.87-1.37)                  | 4.64E-01  | 1.04 (0.91-1.19) | 5.69E-01  | 0.72  | 0                     | 1.05 (0.90-1.24) | 3.83E-01      |  |
| rs147319341     | 11301733 | G/A       | 0.01 | 0.01    | I/I         | 0.97 (0.44-2.16)                  | 9.42E-01  | 0.83 (0.57-1.21) | 3.32E-01  | 0.73  | 0                     | 0.87 (0.53-1.43) | 3.90E-01      |  |
| rs76938695      | 11380328 | T/C       | 0.17 | 0.17    | I/I         | 0.97 (0.78-1.21)                  | 7.87E-01  | 0.95 (0.84-1.07) | 3.98E-01  | 0.86  | 0                     | 0.95 (0.82-1.11) | 3.90E-01      |  |
| rs7844834       | 11286146 | C/A       | 0.31 | 0.32    | O/O         | 0.96 (0.80-1.14)                  | 6.19E-01  | 0.97 (0.88-1.07) | 4.90E-01  | 0.92  | 0                     | 0.96 (0.85-1.09) | 3.96E-01      |  |
| rs77743132      | 11380065 | T/G       | 0.17 | 0.17    | I/I         | 0.97 (0.78-1.20)                  | 7.86E-01  | 0.95 (0.84-1.07) | 4.06E-01  | 0.86  | 0                     | 0.96 (0.82-1.11) | 3.97E-01      |  |
| rs75907152      | 11399802 | T/C       | 0.01 | 0.01    | I/I         | 0.95 (0.45-2.01)                  | 8.86E-01  | 0.81 (0.51-1.28) | 3.67E-01  | 0.73  | 0                     | 0.85 (0.49-1.45) | 4.01E-01      |  |
| rs79058294      | 11379364 | C/G       | 0.01 | 0.01    | I/I         | 0.95 (0.45-2.03)                  | 9.03E-01  | 0.81 (0.51-1.27) | 3.60E-01  | 0.71  | 0                     | 0.85 (0.49-1.45) | 4.01E-01      |  |
| rs75867350      | 11392537 | A/C       | 0.01 | 0.01    | I/I         | 0.95 (0.44-2.01)                  | 8.85E-01  | 0.81 (0.51-1.28) | 3.69E-01  | 0.73  | 0                     | 0.85 (0.49-1.45) | 4.02E-01      |  |
| rs77286122      | 11274668 | C/G       | 0.08 | 0.08    | I/I         | 1.10 (0.81-1.48)                  | 5.48E-01  | 1.05 (0.89-1.24) | 5.44E-01  | 0.82  | 0                     | 1.06 (0.87-1.31) | 4.05E-01      |  |
| rs56018504      | 11385751 | G/A       | 0.15 | 0.16    | I/I         | 0.96 (0.77-1.20)                  | 7.36E-01  | 0.95 (0.84-1.08) | 4.55E-01  | 0.94  | 0                     | 0.96 (0.82-1.12) | 4.17E-01      |  |
| rs76578315      | 11406408 | G/A       | 0.01 | 0.01    | I/I         | 1.08 (0.52-2.24)                  | 8.36E-01  | 1.18 (0.79-1.76) | 4.15E-01  | 0.83  | 0                     | 1.15 (0.70-1.89) | 4.23E-01      |  |
| rs2169889       | 11396914 | T/C       | 0.02 | 0.02    | I/I         | 1.12 (0.60-2.07)                  | 7.30E-01  | 0.81 (0.57-1.16) | 2.52E-01  | 0.38  | 0                     | 0.89 (0.58-1.37) | 4.30E-01      |  |
| rs73195289      | 11408111 | G/C       | 0.14 | 0.13    | I/I         | 1.10 (0.87-1.39)                  | 4.20E-01  | 1.03 (0.90-1.17) | 6.82E-01  | 0.62  | 0                     | 1.05 (0.89-1.23) | 4.38E-01      |  |
| rs3021511       | 11280885 | A/G       | 0.08 | 0.08    | O/O         | 1.09 (0.82-1.46)                  | 5.35E-01  | 1.04 (0.89-1.23) | 6.04E-01  | 0.78  | 0                     | 1.06 (0.87-1.29) | 4.42E-01      |  |
| rs75100307      | 11429771 | G/A       | 0.01 | 0.02    | I/I         | 0.81 (0.42-1.54)                  | 5.17E-01  | 0.90 (0.60-1.35) | 6.21E-01  | 0.78  | 0                     | 0.88 (0.55-1.40) | 4.46E-01      |  |
| rs138250696     | 11367357 | T/C       | 0.01 | 0.02    | I/I         | 1.33 (0.68-2.58)                  | 4.06E-01  | 0.76 (0.52-1.11) | 1.57E-01  | 0.16  | 50                    | 0.89 (0.56-1.41) | 4.47E-01      |  |
| rs73195288      | 11408042 | G/A       | 0.14 | 0.13    | I/I         | 1.10 (0.87-1.40)                  | 4.04E-01  | 1.02 (0.90-1.17) | 7.10E-01  | 0.58  | 0                     | 1.05 (0.89-1.23) | 4.48E-01      |  |
| rs28738823      | 11323362 | C/A       | 0.03 | 0.03    | I/I         | 0.99 (0.60-1.63)                  | 9.76E-01  | 1.12 (0.87-1.44) | 3.65E-01  | 0.66  | 0                     | 1.08 (0.79-1.49) | 4.51E-01      |  |
| rs76470554      | 11388167 | A/G       | 0.16 | 0.16    | I/I         | 0.93 (0.74-1.17)                  | 5.34E-01  | 0.97 (0.85-1.10) | 6.23E-01  | 0.76  | 0                     | 0.96 (0.82-1.12) | 4.55E-01      |  |
| rs73537729      | 11349950 | C/G       | 0.03 | 0.03    | I/I         | 1.11 (0.69-1.80)                  | 6.68E-01  | 1.09 (0.82-1.45) | 5.43E-01  | 0.95  | 0                     | 1.10 (0.78-1.54) | 4.57E-01      |  |
| rs62490881      | 11415146 | G/A       | 0.13 | 0.13    | I/I         | 1.07 (0.84-1.36)                  | 5.74E-01  | 1.04 (0.90-1.19) | 6.12E-01  | 0.81  | 0                     | 1.05 (0.89-1.23) | 4.67E-01      |  |
| rs145332865     | 11335518 | A/G       | 0.01 | 0.01    | I/I         | 0.67 (0.29-1.53)                  | 3.45E-01  | 0.95 (0.64-1.40) | 7.89E-01  | 0.46  | 0                     | 0.86 (0.52-1.44) | 4.67E-01      |  |
| rs11782805      | 11260343 | C/T       | 0.04 | 0.05    | I/I         | 0.84 (0.55-1.27)                  | 3.97E-01  | 0.96 (0.77-1.20) | 7.45E-01  | 0.55  | 0                     | 0.93 (0.70-1.22) | 4.68E-01      |  |
| rs59028919      | 11336216 | G/A       | 0.02 | 0.02    | I/I         | 1.40 (0.85-2.30)                  | 1.90E-01  | 1.01 (0.74-1.36) | 9.71E-01  | 0.27  | 17                    | 1.10 (0.77-1.58) | 4.69E-01      |  |
| rs17153343      | 11349438 | G/A       | 0.03 | 0.03    | O/O         | 1.05 (0.65-1.69)                  | 8.43E-01  | 1.11 (0.84-1.47) | 4.65E-01  | 0.84  | 0                     | 1.09 (0.78-1.53) | 4.69E-01      |  |
| rs56967170      | 11336173 | A/C       | 0.02 | 0.02    | I/I         | 1.39 (0.85-2.30)                  | 1.93E-01  | 1.00 (0.74-1.36) | 9.75E-01  | 0.27  | 17                    | 1.10 (0.77-1.58) | 4.74E-01      |  |
| rs13264212      | 11309849 | C/T       | 0.17 | 0.18    | O/O         | 0.97 (0.78-1.20)                  | 7.87E-01  | 0.96 (0.85-1.08) | 5.08E-01  | 0.93  | 0                     | 0.96 (0.83-1.12) | 4.82E-01      |  |
| rs11989613      | 11277314 | A/G       | 0.08 | 0.07    | I/I         | 1.06 (0.79-1.44)                  | 6.92E-01  | 1.05 (0.89-1.24) | 5.67E-01  | 0.94  | 0                     | 1.05 (0.86-1.29) | 4.87E-01      |  |
| rs2448074       | 11470175 | T/C       | 0.45 | 0.46    | O/O         | 0.99 (0.84-1.16)                  | 8.82E-01  | 0.97 (0.88-1.06) | 4.71E-01  | 0.82  | 0                     | 0.97 (0.87-1.09) | 4.91E-01      |  |
| rs922485        | 11408606 | T/C       | 0.14 | 0.13    | I/I         | 1.10 (0.87-1.40)                  | 4.07E-01  | 1.02 (0.89-1.16) | 7.72E-01  | 0.56  | 0                     | 1.04 (0.89-1.23) | 4.92E-01      |  |
| rs77643841      | 11346963 | G/T       | 0.02 | 0.02    | I/I         | 1.27 (0.77-2.09)                  | 3.42E-01  | 1.03 (0.77-1.39) | 8.31E-01  | 0.48  | 0                     | 1.10 (0.77-1.56) | 4.93E-01      |  |
| rs78373572      | 11411800 | T/C       | 0.01 | 0.01    | I/I         | 1.06 (0.51-2.19)                  | 8.75E-01  | 0.81 (0.51-1.28) | 3.66E-01  | 0.54  | 0                     | 0.87 (0.51-1.49) | 4.95E-01      |  |
| rs73195287      | 11407013 | G/C       | 0.14 | 0.14    | I/I         | 1.11 (0.88-1.40)                  | 3.89E-01  | 1.02 (0.89-1.16) | 7.99E-01  | 0.53  | 0                     | 1.04 (0.89-1.22) | 5.01E-01      |  |
| rs58209053      | 11336964 | T/C       | 0.02 | 0.02    | I/I         | 1.39 (0.85-2.30)                  | 1.93E-01  | 0.99 (0.73-1.35) | 9.64E-01  | 0.26  | 23                    | 1.09 (0.76-1.56) | 5.15E-01      |  |
| rs10089185      | 11285609 | A/C       | 0.09 | 0.09    | O/O         | 0.97 (0.73-1.29)                  | 8.47E-01  | 0.95 (0.81-1.11) | 5.20E-01  | 0.88  | 0                     | 0.96 (0.79-1.16) | 5.17E-01      |  |
| rs117005175     | 11297477 | G/C       | 0.01 | 0.01    | I/I         | 0.91 (0.42-1.98)                  | 8.21E-01  | 0.87 (0.56-1.35) | 5.35E-01  | 0.91  | 0                     | 0.88 (0.52-1.50) | 5.19E-01      |  |
| rs11775511      | 11272079 | C/T       | 0.08 | 0.08    | O/O         | 0.83 (0.60-1.14)                  | 2.48E-01  | 1.00 (0.84-1.18) | 9.81E-01  | 0.31  | 2                     | 0.95 (0.77-1.17) | 5.26E-01      |  |
| rs717717        | 11335377 | G/C       | 0.02 | 0.02    | I/I         | 1.40 (0.85-2.30)                  | 1.90E-01  | 0.98 (0.72-1.34) | 9.13E-01  | 0.24  | 27                    | 1.08 (0.75-1.56) | 5.47E-01      |  |



**Supplementary Table 10.** Association analysis in *BLK*

| SNP             | BP       | Alleles   |      | MAF     |             | Observed or Imputed in Dataset1/2 | Dataset 1 |                  | Dataset 2 |                | Test of heterogeneity |                  | Meta analysis |  |
|-----------------|----------|-----------|------|---------|-------------|-----------------------------------|-----------|------------------|-----------|----------------|-----------------------|------------------|---------------|--|
|                 |          | maj / min | Case | Control | OR (95% CI) |                                   | P         | OR (95% CI)      | P         | P <sub>Q</sub> | I <sup>2</sup>        | OR (95% CI)      | P             |  |
|                 |          |           |      |         |             |                                   |           |                  |           |                |                       |                  |               |  |
| rs77739684      | 11276706 | G/A       | 0.07 | 0.08    | I/I         | 1.05 (0.77-1.44)                  | 7.43E-01  | 0.92 (0.77-1.10) | 3.63E-01  | 0.47           | 0                     | 0.96 (0.77-1.18) | 5.49E-01      |  |
| rs79135632      | 11429053 | C/G       | 0.01 | 0.01    | I/I         | 0.96 (0.45-2.04)                  | 9.14E-01  | 0.87 (0.55-1.35) | 5.26E-01  | 0.82           | 0                     | 0.89 (0.52-1.52) | 5.52E-01      |  |
| rs2736327       | 11332036 | A/C       | 0.03 | 0.03    | I/I         | 0.85 (0.47-1.52)                  | 5.74E-01  | 1.15 (0.88-1.51) | 2.97E-01  | 0.34           | 0                     | 1.06 (0.74-1.51) | 5.56E-01      |  |
| rs78202955      | 11275464 | T/C       | 0.08 | 0.07    | I/I         | 1.08 (0.80-1.46)                  | 6.26E-01  | 1.03 (0.87-1.23) | 6.97E-01  | 0.81           | 0                     | 1.05 (0.85-1.29) | 5.56E-01      |  |
| rs117704274     | 11353586 | A/G       | 0.01 | 0.01    | I/I         | 1.15 (0.55-2.40)                  | 7.07E-01  | 1.09 (0.74-1.62) | 6.49E-01  | 0.91           | 0                     | 1.11 (0.68-1.81) | 5.58E-01      |  |
| rs116966174     | 11320550 | C/T       | 0.03 | 0.03    | I/I         | 0.99 (0.60-1.62)                  | 9.57E-01  | 1.10 (0.84-1.43) | 4.76E-01  | 0.70           | 0                     | 1.07 (0.77-1.48) | 5.65E-01      |  |
| rs74610623      | 11276562 | T/C       | 0.08 | 0.07    | I/I         | 1.06 (0.78-1.44)                  | 7.01E-01  | 1.04 (0.88-1.23) | 6.65E-01  | 0.90           | 0                     | 1.04 (0.85-1.28) | 5.68E-01      |  |
| rs145604561     | 11373020 | G/A       | 0.01 | 0.01    | I/I         | 1.12 (0.53-2.35)                  | 7.74E-01  | 0.84 (0.55-1.27) | 4.04E-01  | 0.51           | 0                     | 0.91 (0.54-1.51) | 5.79E-01      |  |
| rs78939349      | 11276854 | G/A       | 0.08 | 0.07    | I/I         | 1.06 (0.78-1.44)                  | 7.02E-01  | 1.03 (0.87-1.23) | 6.86E-01  | 0.89           | 0                     | 1.04 (0.85-1.28) | 5.86E-01      |  |
| rs4841539       | 11309277 | G/A       | 0.26 | 0.26    | I/I         | 1.00 (0.83-1.20)                  | 9.71E-01  | 0.97 (0.87-1.07) | 5.36E-01  | 0.79           | 0                     | 0.98 (0.86-1.11) | 5.86E-01      |  |
| rs80167929      | 11400650 | G/A       | 0.01 | 0.02    | I/I         | 1.11 (0.58-2.11)                  | 7.46E-01  | 0.84 (0.56-1.26) | 3.98E-01  | 0.47           | 0                     | 0.91 (0.56-1.46) | 5.86E-01      |  |
| rs11250137      | 11310498 | G/C       | 0.28 | 0.28    | I/I         | 0.99 (0.83-1.19)                  | 9.32E-01  | 0.97 (0.88-1.07) | 5.64E-01  | 0.83           | 0                     | 0.98 (0.86-1.10) | 5.93E-01      |  |
| rs6994605       | 11405437 | A/G       | 0.01 | 0.02    | I/I         | 1.04 (0.54-2.03)                  | 9.01E-01  | 0.87 (0.59-1.28) | 4.82E-01  | 0.65           | 0                     | 0.92 (0.58-1.45) | 5.95E-01      |  |
| rs17153240      | 11292068 | G/A       | 0.09 | 0.09    | I/I         | 0.96 (0.73-1.28)                  | 7.95E-01  | 0.96 (0.82-1.13) | 6.54E-01  | 1.00           | 0                     | 0.96 (0.79-1.17) | 6.05E-01      |  |
| rs11776411      | 11272866 | C/G       | 0.08 | 0.08    | I/I         | 0.82 (0.59-1.12)                  | 2.15E-01  | 1.01 (0.86-1.20) | 8.68E-01  | 0.24           | 27                    | 0.95 (0.77-1.18) | 6.05E-01      |  |
| rs7005030       | 11369821 | T/C       | 0.27 | 0.26    | I/I         | 1.05 (0.88-1.27)                  | 5.75E-01  | 1.01 (0.91-1.12) | 8.00E-01  | 0.72           | 0                     | 1.03 (0.90-1.16) | 6.09E-01      |  |
| rs11777648      | 11450443 | C/T       | 0.07 | 0.06    | I/I         | 0.98 (0.69-1.39)                  | 9.03E-01  | 1.06 (0.89-1.27) | 5.00E-01  | 0.68           | 0                     | 1.04 (0.83-1.31) | 6.13E-01      |  |
| rs14573986      | 11310418 | G/A       | 0.01 | 0.01    | I/I         | 0.45 (0.16-1.29)                  | 1.36E-01  | 1.07 (0.72-1.60) | 7.31E-01  | 0.13           | 56                    | 0.84 (0.47-1.51) | 6.19E-01      |  |
| rs76738826      | 11417632 | A/C       | 0.12 | 0.12    | I/I         | 1.05 (0.82-1.35)                  | 6.94E-01  | 1.02 (0.89-1.18) | 7.51E-01  | 0.85           | 0                     | 1.03 (0.87-1.22) | 6.33E-01      |  |
| rs62490933      | 11447758 | A/C       | 0.07 | 0.06    | I/I         | 0.99 (0.70-1.41)                  | 9.53E-01  | 1.05 (0.88-1.26) | 5.65E-01  | 0.75           | 0                     | 1.04 (0.83-1.30) | 6.48E-01      |  |
| rs79918215      | 11329932 | T/G       | 0.01 | 0.01    | I/I         | 1.10 (0.51-2.38)                  | 8.01E-01  | 1.07 (0.74-1.56) | 7.10E-01  | 0.95           | 0                     | 1.08 (0.67-1.75) | 6.54E-01      |  |
| rs922484        | 11408401 | T/C       | 0.14 | 0.14    | O/O         | 1.09 (0.86-1.38)                  | 4.59E-01  | 1.00 (0.88-1.15) | 9.58E-01  | 0.54           | 0                     | 1.03 (0.88-1.21) | 6.61E-01      |  |
| rs56255555      | 11272284 | G/T       | 0.08 | 0.08    | I/I         | 0.84 (0.61-1.16)                  | 2.98E-01  | 1.01 (0.86-1.20) | 8.86E-01  | 0.32           | 0                     | 0.96 (0.78-1.19) | 6.67E-01      |  |
| rs117467361     | 11370618 | C/T       | 0.01 | 0.01    | I/I         | 1.25 (0.61-2.54)                  | 5.44E-01  | 0.83 (0.55-1.27) | 3.97E-01  | 0.34           | 0                     | 0.93 (0.56-1.55) | 6.93E-01      |  |
| rs11775674      | 11272618 | C/T       | 0.08 | 0.08    | I/I         | 0.84 (0.61-1.16)                  | 2.81E-01  | 1.02 (0.86-1.20) | 8.34E-01  | 0.29           | 9                     | 0.96 (0.78-1.19) | 6.93E-01      |  |
| rs56125952      | 11272312 | T/A       | 0.08 | 0.08    | I/I         | 0.84 (0.61-1.16)                  | 2.81E-01  | 1.02 (0.86-1.20) | 8.33E-01  | 0.29           | 9                     | 0.96 (0.78-1.19) | 6.94E-01      |  |
| rs77072957      | 11373791 | A/G       | 0.16 | 0.16    | I/I         | 0.97 (0.77-1.20)                  | 7.58E-01  | 0.98 (0.87-1.11) | 8.04E-01  | 0.88           | 0                     | 0.98 (0.84-1.14) | 7.09E-01      |  |
| rs191160522     | 11261494 | A/C       | 0.01 | 0.01    | I/I         | 0.73 (0.33-1.58)                  | 4.23E-01  | 1.01 (0.67-1.53) | 9.42E-01  | 0.46           | 0                     | 0.92 (0.55-1.55) | 7.16E-01      |  |
| rs1478899       | 11347107 | T/C       | 0.03 | 0.03    | O/O         | 1.14 (0.75-1.72)                  | 5.34E-01  | 1.00 (0.78-1.29) | 9.78E-01  | 0.61           | 0                     | 1.04 (0.77-1.40) | 7.23E-01      |  |
| rs144831397     | 11371962 | G/T       | 0.01 | 0.01    | I/I         | 1.25 (0.61-2.54)                  | 5.45E-01  | 0.84 (0.55-1.29) | 4.26E-01  | 0.35           | 0                     | 0.94 (0.57-1.56) | 7.24E-01      |  |
| rs117025672     | 11273988 | G/C       | 0.08 | 0.07    | I/I         | 1.07 (0.79-1.45)                  | 6.66E-01  | 1.01 (0.85-1.20) | 8.88E-01  | 0.76           | 0                     | 1.03 (0.83-1.27) | 7.28E-01      |  |
| rs2618450       | 11376790 | G/A       | 0.27 | 0.27    | O/O         | 1.06 (0.89-1.27)                  | 4.94E-01  | 1.00 (0.90-1.11) | 9.84E-01  | 0.55           | 0                     | 1.02 (0.90-1.15) | 7.29E-01      |  |
| rs79145090      | 11295747 | A/G       | 0.11 | 0.11    | I/I         | 1.09 (0.85-1.40)                  | 5.08E-01  | 0.94 (0.81-1.09) | 4.13E-01  | 0.32           | 0                     | 0.98 (0.82-1.17) | 7.33E-01      |  |
| rs73201416      | 11467688 | A/G       | 0.02 | 0.02    | I/I         | 0.95 (0.46-1.94)                  | 8.80E-01  | 1.09 (0.76-1.58) | 6.33E-01  | 0.72           | 0                     | 1.05 (0.66-1.67) | 7.47E-01      |  |
| rs117127647     | 11259260 | A/T       | 0.07 | 0.07    | I/I         | 1.04 (0.76-1.42)                  | 8.17E-01  | 1.02 (0.86-1.22) | 8.24E-01  | 0.92           | 0                     | 1.03 (0.83-1.27) | 7.55E-01      |  |
| rs56359406      | 11273275 | G/T       | 0.08 | 0.08    | I/I         | 0.82 (0.60-1.13)                  | 2.21E-01  | 1.03 (0.88-1.22) | 6.82E-01  | 0.20           | 38                    | 0.97 (0.79-1.19) | 7.62E-01      |  |
| rs74509333      | 11316062 | C/T       | 0.11 | 0.10    | I/I         | 1.13 (0.87-1.45)                  | 3.60E-01  | 0.98 (0.85-1.14) | 8.28E-01  | 0.37           | 0                     | 1.02 (0.85-1.22) | 7.63E-01      |  |
| rs150365200     | 11261981 | G/C       | 0.07 | 0.07    | I/I         | 1.04 (0.76-1.42)                  | 8.12E-01  | 1.02 (0.85-1.22) | 8.37E-01  | 0.92           | 0                     | 1.02 (0.83-1.27) | 7.64E-01      |  |
| rs76368678      | 11322413 | G/C       | 0.02 | 0.02    | I/I         | 0.71 (0.35-1.42)                  | 3.32E-01  | 1.05 (0.72-1.52) | 7.99E-01  | 0.33           | 0                     | 0.94 (0.59-1.49) | 7.64E-01      |  |
| rs62492460      | 11461785 | G/A       | 0.06 | 0.06    | I/I         | 1.16 (0.84-1.62)                  | 3.69E-01  | 0.98 (0.80-1.19) | 8.33E-01  | 0.38           | 0                     | 1.03 (0.81-1.30) | 7.64E-01      |  |
| chr8:11461274:i | 11461274 | A/AG      | 0.06 | 0.06    | I/I         | 1.16 (0.84-1.62)                  | 3.69E-01  | 0.98 (0.80-1.19) | 8.33E-01  | 0.38           | 0                     | 1.03 (0.81-1.30) | 7.65E-01      |  |
| rs76658568      | 11307506 | C/G       | 0.03 | 0.03    | I/I         | 0.99 (0.63-1.56)                  | 9.54E-01  | 0.96 (0.75-1.24) | 7.58E-01  | 0.92           | 0                     | 0.97 (0.71-1.32) | 7.71E-01      |  |
| rs56069917      | 11272179 | C/T       | 0.08 | 0.08    | I/I         | 0.84 (0.61-1.16)                  | 3.01E-01  | 1.03 (0.87-1.21) | 7.54E-01  | 0.29           | 11                    | 0.97 (0.79-1.20) | 7.77E-01      |  |
| rs62490935      | 11452307 | C/T       | 0.06 | 0.06    | I/I         | 1.19 (0.86-1.66)                  | 2.95E-01  | 0.97 (0.79-1.18) | 7.41E-01  | 0.29           | 12                    | 1.03 (0.81-1.30) | 7.81E-01      |  |
| chr8:11314403:D | 11314403 | TGGG/T    | 0.11 | 0.11    | I/I         | 1.13 (0.88-1.45)                  | 3.42E-01  | 0.98 (0.85-1.13) | 7.86E-01  | 0.34           | 0                     | 1.02 (0.86-1.21) | 7.84E-01      |  |
| rs62490934      | 11450828 | T/A       | 0.07 | 0.07    | I/I         | 0.96 (0.68-1.36)                  | 8.22E-01  | 1.04 (0.87-1.24) | 6.45E-01  | 0.68           | 0                     | 1.02 (0.82-1.27) | 7.86E-01      |  |
| rs55888399      | 11273161 | C/T       | 0.08 | 0.08    | I/I         | 0.85 (0.61-1.16)                  | 3.02E-01  | 1.03 (0.87-1.22) | 7.42E-01  | 0.29           | 12                    | 0.97 (0.79-1.20) | 7.89E-01      |  |
| rs74761252      | 11284156 | G/A       | 0.07 | 0.07    | I/I         | 1.02 (0.75-1.39)                  | 9.16E-01  | 1.02 (0.85-1.23) | 8.09E-01  | 0.97           | 0                     | 1.02 (0.82-1.27) | 7.94E-01      |  |
| rs28668864      | 11297611 | G/A       | 0.07 | 0.07    | I/I         | 1.14 (0.86-1.52)                  | 3.58E-01  | 0.92 (0.76-1.11) | 3.76E-01  | 0.21           | 36                    | 0.98 (0.79-1.21) | 7.95E-01      |  |
| rs76793305      | 11320768 | G/A       | 0.02 | 0.02    | I/I         | 0.70 (0.35-1.41)                  | 3.25E-01  | 1.06 (0.73-1.53) | 7.54E-01  | 0.31           | 3                     | 0.94 (0.60-1.50) | 7.96E-01      |  |
| rs140708080     | 11276972 | A/C       | 0.07 | 0.07    | I/I         | 0.89 (0.64-1.23)                  | 4.69E-01  | 1.01 (0.85-1.22) | 8.70E-01  | 0.48           | 0                     | 0.98 (0.78-1.22) | 8.06E-01      |  |
| rs75527179      | 11275997 | G/A       | 0.07 | 0.07    | I/I         | 0.93 (0.67-1.29)                  | 6.44E-01  | 1.00 (0.84-1.20) | 9.88E-01  | 0.68           | 0                     | 0.98 (0.78-1.22) | 8.16E-01      |  |
| rs140607433     | 11271908 | C/T       | 0.04 | 0.04    | I/I         | 1.01 (0.67-1.51)                  | 9.68E-01  | 0.96 (0.75-1.23) | 7.64E-01  | 0.85           | 0                     | 0.98 (0.73-1.30) | 8.16E-01      |  |
| rs115826830     | 11314785 | T/G       | 0.11 | 0.11    | I/I         | 1.10 (0.85-1.41)                  | 4.77E-01  | 0.95 (0.82-1.10) | 4.72E-01  | 0.33           | 0                     | 0.99 (0.83-1.18) | 8.16E-01      |  |
| rs11783137      | 11448738 | G/T       | 0.07 | 0.07    | O/O         | 1.00 (0.72-1.40)                  | 9.87E-01  | 0.97 (0.81-1.17) | 7.79E-01  | 0.88           | 0                     | 0.98 (0.79-1.23) | 8.19E-01      |  |
| rs28479369      | 11305586 | C/T       | 0.11 | 0.11    | I/I         | 1.08 (0.84-1.38)                  | 5.46E-01  | 0.95 (0.82-1.10) | 5.28E-01  | 0.40           | 0                     | 0.99 (0.83-1.18) | 8.31E-01      |  |
| rs151258037     | 11271880 | C/T       | 0.04 | 0.04    | I/I         | 1.01 (0.67-1.51)                  | 9.69E-01  | 0.97 (0.76-1.24) | 7.94E-01  | 0.87           | 0                     | 0.98 (0.73-1.31) | 8.41E-01      |  |
| rs2618466       | 11362698 | T/C       | 0.02 | 0.02    | O/I         | 1.51 (0.87-2.61)                  | 1.41E-01  | 0.79 (0.52-1.18) | 2.50E-01  | 0.06           | 71                    | 0.95 (0.60-1.48) | 8.49E-01      |  |
| rs140934077     | 11261423 | C/A       | 0.03 | 0.03    | I/I         | 1.08 (0.68-1.71)                  | 7.49E-01  | 1.00 (0.78-1.29) | 9.87E-01  | 0.78           | 0                     | 1.02 (0.75-1.40) | 8.54E-01      |  |
| rs74546638      | 11310999 | C/G       | 0.11 | 0.11    | I/I         | 1.08 (0.84-1.39)                  | 5.47E-01  | 0.96 (0.83-1.11) | 5.54E-01  | 0.41           | 0                     | 0.99 (0.83-1.18) | 8.56E-01      |  |
| rs77097456      | 11281441 | C/T       | 0.08 | 0.08    | I/I         | 1.00 (0.74-1.36)                  | 9.75E-01  | 1.02 (0.86-1.20) | 8.53E-01  | 0.95           | 0                     | 1.01 (0.82-1.25) | 8.62E-01      |  |
| rs11777247      | 11454989 | C/T       | 0.06 | 0.06    | I/I         | 1.16 (0.84-1.62)                  | 3.71E-01  | 0.96 (0.79-1.17) | 7.20E-01  | 0.34           | 0                     | 1.02 (0.80-1.29) | 8.62E-01      |  |
| rs28561410      | 11305585 | C/G       | 0.11 | 0.11    | I/I         | 1.09 (0.85-1.40)                  | 4.81E-01  | 0.95 (0.82-1.10) | 5.18E-01  | 0.35           | 0                     | 0.99 (0.83-1.18) | 8.63E-01      |  |
| rs76149735      | 11275960 | A/T       | 0.07 | 0.07    | I/I         | 0.92 (0.66-1.28)                  | 6.34E-01  | 1.01 (0.84-1.21) | 9.21E-01  | 0.64           | 0                     | 0.98 (0.79-1.23) | 8.66E-01      |  |
| rs74604441      | 11278392 | G/A       | 0.03 | 0.03    | I/I         | 1.11 (0.70-1.76)                  | 6.63E-01  | 0.99 (0.77-1.27) | 9.37E-01  | 0.67           | 0                     | 1.02 (0.75-1.39) | 8.69E-01      |  |
| rs62490959      | 11459006 | C/A       | 0.06 | 0.06    | I/I         | 1.16 (0.84-1.62)                  | 3.69E-01  | 0.96 (0.79-1.17) | 7.03E-01  | 0.33           | 0                     | 1.02 (0.80-1.28) | 8.76E-01      |  |
| rs7008392       | 11287754 | T/A       | 0.09 | 0.09    | I/I         | 0.98 (0.75-1.30)                  | 9.10E-01  | 0.99 (0.85-1.16) | 9.11E-01  | 0.97           | 0                     | 0.99 (0.82-1.20) | 8.77E-01      |  |

**Supplementary Table 10.** Association analysis in *BLK*

| SNP         | BP       | Alleles   |      | MAF     |             | Observed or Imputed in Dataset1/2 | Dataset 1 |                  | Dataset 2 |       | Test of heterogeneity |                  | Meta analysis |  |
|-------------|----------|-----------|------|---------|-------------|-----------------------------------|-----------|------------------|-----------|-------|-----------------------|------------------|---------------|--|
|             |          | maj / min | Case | Control | OR (95% CI) |                                   | P         | OR (95% CI)      | P         | $P_Q$ | $I^2$                 | OR (95% CI)      | P             |  |
|             |          |           |      |         |             |                                   |           |                  |           |       |                       |                  |               |  |
| rs77388456  | 11305807 | C/T       | 0.11 | 0.11    | I/I         | 1.10 (0.86-1.42)                  | 4.40E-01  | 0.95 (0.82-1.10) | 5.14E-01  | 0.32  | 0                     | 0.99 (0.83-1.18) | 8.88E-01      |  |
| rs4585710   | 11303828 | C/T       | 0.11 | 0.11    | I/I         | 1.10 (0.86-1.41)                  | 4.35E-01  | 0.98 (0.85-1.13) | 7.43E-01  | 0.40  | 0                     | 1.01 (0.85-1.20) | 8.91E-01      |  |
| rs28606038  | 11294245 | C/G       | 0.11 | 0.11    | I/I         | 1.11 (0.86-1.42)                  | 4.20E-01  | 0.95 (0.82-1.10) | 5.13E-01  | 0.30  | 5                     | 0.99 (0.83-1.18) | 9.00E-01      |  |
| rs145519807 | 11348225 | A/G       | 0.01 | 0.01    | I/I         | 1.12 (0.50-2.52)                  | 7.74E-01  | 0.93 (0.63-1.40) | 7.42E-01  | 0.69  | 0                     | 0.99 (0.59-1.65) | 9.00E-01      |  |
| rs13438815  | 11305681 | C/T       | 0.11 | 0.11    | I/I         | 1.10 (0.86-1.41)                  | 4.53E-01  | 0.96 (0.83-1.11) | 5.43E-01  | 0.34  | 0                     | 0.99 (0.84-1.18) | 9.08E-01      |  |
| rs5011845   | 11305322 | C/T       | 0.11 | 0.11    | I/I         | 1.11 (0.86-1.42)                  | 4.30E-01  | 0.95 (0.82-1.11) | 5.38E-01  | 0.32  | 0                     | 1.00 (0.83-1.19) | 9.18E-01      |  |
| rs146519298 | 11346637 | C/T       | 0.01 | 0.01    | I/I         | 1.12 (0.50-2.50)                  | 7.86E-01  | 0.94 (0.63-1.41) | 7.80E-01  | 0.71  | 0                     | 0.99 (0.59-1.66) | 9.26E-01      |  |
| rs117084385 | 11296546 | T/C       | 0.04 | 0.04    | I/I         | 0.89 (0.59-1.34)                  | 5.69E-01  | 1.06 (0.83-1.35) | 6.43E-01  | 0.47  | 0                     | 1.01 (0.75-1.34) | 9.28E-01      |  |
| rs3021510   | 11280737 | A/G       | 0.08 | 0.08    | I/I         | 1.05 (0.77-1.42)                  | 7.61E-01  | 0.99 (0.84-1.17) | 9.32E-01  | 0.76  | 0                     | 1.01 (0.82-1.23) | 9.31E-01      |  |
| rs10099562  | 11287148 | T/C       | 0.09 | 0.09    | I/I         | 0.98 (0.75-1.30)                  | 9.11E-01  | 1.00 (0.85-1.17) | 9.76E-01  | 0.93  | 0                     | 0.99 (0.82-1.20) | 9.32E-01      |  |
| rs59228223  | 11277818 | A/G       | 0.07 | 0.07    | I/I         | 0.88 (0.64-1.23)                  | 4.66E-01  | 1.05 (0.88-1.25) | 5.98E-01  | 0.37  | 0                     | 1.00 (0.80-1.25) | 9.52E-01      |  |
| rs13439101  | 11304486 | C/A       | 0.11 | 0.11    | I/I         | 1.10 (0.86-1.41)                  | 4.56E-01  | 0.96 (0.83-1.11) | 5.91E-01  | 0.36  | 0                     | 1.00 (0.84-1.19) | 9.52E-01      |  |
| rs60114642  | 11277410 | A/G       | 0.07 | 0.07    | I/I         | 0.89 (0.64-1.23)                  | 4.73E-01  | 1.05 (0.88-1.25) | 6.06E-01  | 0.38  | 0                     | 1.00 (0.80-1.25) | 9.55E-01      |  |
| rs77784152  | 11283959 | G/C       | 0.03 | 0.03    | I/I         | 1.02 (0.63-1.66)                  | 9.26E-01  | 0.98 (0.75-1.28) | 9.07E-01  | 0.89  | 0                     | 1.00 (0.72-1.38) | 9.60E-01      |  |
| rs10111303  | 11304951 | C/G       | 0.11 | 0.11    | I/I         | 1.10 (0.86-1.41)                  | 4.52E-01  | 0.96 (0.83-1.11) | 5.97E-01  | 0.36  | 0                     | 1.00 (0.84-1.19) | 9.61E-01      |  |
| rs187562695 | 11261961 | G/T       | 0.05 | 0.05    | I/I         | 0.86 (0.59-1.27)                  | 4.58E-01  | 1.05 (0.86-1.29) | 6.07E-01  | 0.37  | 0                     | 1.00 (0.77-1.29) | 9.67E-01      |  |
| rs141849998 | 11261959 | C/T       | 0.06 | 0.06    | I/I         | 0.90 (0.63-1.28)                  | 5.43E-01  | 1.04 (0.86-1.26) | 6.71E-01  | 0.46  | 0                     | 1.00 (0.79-1.27) | 9.70E-01      |  |
| rs2255227   | 11410538 | T/C       | 0.01 | 0.01    | I/I         | 1.01 (0.47-2.18)                  | 9.69E-01  | 1.00 (0.64-1.57) | 9.89E-01  | 0.98  | 0                     | 1.01 (0.59-1.72) | 9.74E-01      |  |
| rs59668455  | 11274249 | C/T       | 0.07 | 0.07    | I/I         | 0.93 (0.66-1.29)                  | 6.50E-01  | 1.03 (0.86-1.23) | 7.54E-01  | 0.58  | 0                     | 1.00 (0.80-1.25) | 9.80E-01      |  |
| rs59948694  | 11274240 | G/T       | 0.07 | 0.07    | I/I         | 0.93 (0.66-1.29)                  | 6.50E-01  | 1.02 (0.86-1.23) | 7.95E-01  | 0.60  | 0                     | 1.00 (0.80-1.24) | 9.84E-01      |  |
| rs76154097  | 11367042 | C/T       | 0.16 | 0.16    | I/I         | 0.98 (0.79-1.23)                  | 8.85E-01  | 1.01 (0.89-1.14) | 9.30E-01  | 0.86  | 0                     | 1.00 (0.86-1.16) | 9.99E-01      |  |

**Supplementary Table 11.** Association analysis in *CXCR5*

| SNP               | BP        | Alleles   |      | MAF     |             | Observed or Imputed in Dataset1/2 | Dataset 1 |                  | Dataset 2 |                | Test of heterogeneity |                  | Meta analysis |  |
|-------------------|-----------|-----------|------|---------|-------------|-----------------------------------|-----------|------------------|-----------|----------------|-----------------------|------------------|---------------|--|
|                   |           | maj / min | Case | Control | OR (95% CI) |                                   | P         | OR (95% CI)      | P         | P <sub>Q</sub> | I <sup>2</sup>        | OR (95% CI)      | P             |  |
|                   |           |           |      |         |             |                                   |           |                  |           |                |                       |                  |               |  |
| rs7119038         | 118738281 | A/G       | 0.18 | 0.23    | I/I         | 0.79 (0.64-0.98)                  | 3.32E-02  | 0.72 (0.64-0.81) | 6.33E-08  | 0.47           | 0                     | 0.74 (0.64-0.86) | 1.10E-08      |  |
| rs11217033        | 118673706 | T/C       | 0.17 | 0.21    | I/I         | 0.80 (0.65-0.99)                  | 4.34E-02  | 0.72 (0.64-0.81) | 5.35E-08  | 0.35           | 0                     | 0.74 (0.64-0.86) | 1.33E-08      |  |
| rs7481797         | 118745243 | G/A       | 0.15 | 0.20    | I/I         | 0.79 (0.63-0.99)                  | 3.94E-02  | 0.72 (0.63-0.81) | 1.21E-07  | 0.46           | 0                     | 0.74 (0.63-0.86) | 2.47E-08      |  |
| rs7481819         | 118745278 | T/C       | 0.15 | 0.20    | I/I         | 0.79 (0.63-0.99)                  | 4.11E-02  | 0.72 (0.63-0.81) | 1.30E-07  | 0.46           | 0                     | 0.74 (0.63-0.86) | 2.78E-08      |  |
| rs10790275        | 118745884 | C/G       | 0.15 | 0.20    | I/I         | 0.80 (0.64-1.00)                  | 4.98E-02  | 0.72 (0.63-0.82) | 2.38E-07  | 0.43           | 0                     | 0.74 (0.64-0.86) | 6.07E-08      |  |
| rs11217020        | 118639353 | G/A       | 0.17 | 0.21    | I/I         | 0.81 (0.66-1.00)                  | 5.37E-02  | 0.73 (0.65-0.82) | 2.21E-07  | 0.38           | 0                     | 0.75 (0.65-0.87) | 6.20E-08      |  |
| chr11:118740104:D | 118740104 | A/AT      | 0.15 | 0.20    | I/I         | 0.81 (0.65-1.01)                  | 6.54E-02  | 0.72 (0.63-0.81) | 1.77E-07  | 0.32           | 0                     | 0.74 (0.64-0.86) | 6.78E-08      |  |
| rs4936443         | 118740864 | T/C       | 0.16 | 0.20    | O/O         | 0.79 (0.63-0.98)                  | 3.21E-02  | 0.74 (0.65-0.83) | 5.03E-07  | 0.61           | 0                     | 0.75 (0.65-0.87) | 6.82E-08      |  |
| rs11217074        | 118734000 | T/C       | 0.16 | 0.20    | I/I         | 0.80 (0.64-1.00)                  | 4.59E-02  | 0.73 (0.65-0.82) | 3.42E-07  | 0.49           | 0                     | 0.75 (0.65-0.87) | 7.41E-08      |  |
| rs4938573         | 118741842 | T/C       | 0.16 | 0.20    | O/O         | 0.79 (0.64-0.99)                  | 3.94E-02  | 0.73 (0.65-0.83) | 4.45E-07  | 0.54           | 0                     | 0.75 (0.65-0.87) | 7.80E-08      |  |
| rs7951740         | 118740418 | C/G       | 0.16 | 0.20    | I/I         | 0.80 (0.64-0.99)                  | 4.39E-02  | 0.73 (0.65-0.83) | 4.32E-07  | 0.50           | 0                     | 0.75 (0.65-0.87) | 8.69E-08      |  |
| rs7119044         | 118738298 | C/G       | 0.16 | 0.20    | I/I         | 0.81 (0.65-1.01)                  | 6.61E-02  | 0.73 (0.65-0.82) | 2.94E-07  | 0.39           | 0                     | 0.75 (0.65-0.87) | 1.04E-07      |  |
| rs4936444         | 118743338 | C/T       | 0.16 | 0.20    | I/I         | 0.82 (0.66-1.02)                  | 7.10E-02  | 0.73 (0.65-0.82) | 2.86E-07  | 0.37           | 0                     | 0.75 (0.65-0.87) | 1.11E-07      |  |
| rs7122669         | 118739056 | G/A       | 0.16 | 0.20    | I/I         | 0.80 (0.65-1.00)                  | 5.22E-02  | 0.73 (0.65-0.83) | 4.44E-07  | 0.46           | 0                     | 0.75 (0.65-0.87) | 1.11E-07      |  |
| rs11217058        | 118722149 | G/A       | 0.16 | 0.20    | I/I         | 0.78 (0.62-0.97)                  | 2.78E-02  | 0.74 (0.66-0.84) | 1.24E-06  | 0.71           | 0                     | 0.75 (0.65-0.87) | 1.30E-07      |  |
| rs10790269        | 118729456 | T/C       | 0.16 | 0.20    | I/I         | 0.81 (0.65-1.01)                  | 5.62E-02  | 0.74 (0.65-0.83) | 5.24E-07  | 0.47           | 0                     | 0.75 (0.65-0.88) | 1.39E-07      |  |
| rs10892296        | 118718729 | C/T       | 0.15 | 0.19    | I/I         | 0.78 (0.62-0.98)                  | 3.40E-02  | 0.74 (0.65-0.83) | 1.07E-06  | 0.64           | 0                     | 0.75 (0.64-0.87) | 1.44E-07      |  |
| rs12365699        | 118743286 | G/A       | 0.13 | 0.17    | O/O         | 0.81 (0.65-1.03)                  | 8.12E-02  | 0.71 (0.63-0.81) | 3.17E-07  | 0.33           | 0                     | 0.74 (0.63-0.87) | 1.46E-07      |  |
| rs17122453        | 118683564 | G/A       | 0.17 | 0.22    | I/I         | 0.80 (0.65-0.99)                  | 4.17E-02  | 0.74 (0.66-0.84) | 8.63E-07  | 0.53           | 0                     | 0.76 (0.66-0.88) | 1.52E-07      |  |
| rs4936441         | 118725660 | G/C       | 0.16 | 0.20    | I/I         | 0.80 (0.64-0.99)                  | 4.40E-02  | 0.74 (0.66-0.83) | 8.77E-07  | 0.57           | 0                     | 0.75 (0.65-0.88) | 1.63E-07      |  |
| rs74541740        | 118742800 | G/A       | 0.16 | 0.20    | I/I         | 0.80 (0.64-1.00)                  | 5.07E-02  | 0.74 (0.66-0.83) | 9.18E-07  | 0.52           | 0                     | 0.76 (0.65-0.88) | 2.03E-07      |  |
| rs6421571         | 118743772 | C/T       | 0.16 | 0.20    | I/I         | 0.81 (0.65-1.01)                  | 6.60E-02  | 0.74 (0.65-0.83) | 6.50E-07  | 0.43           | 0                     | 0.76 (0.65-0.88) | 2.08E-07      |  |
| rs10892294        | 118667357 | G/C       | 0.17 | 0.21    | I/I         | 0.81 (0.66-1.00)                  | 4.84E-02  | 0.75 (0.66-0.84) | 1.09E-06  | 0.51           | 0                     | 0.76 (0.66-0.88) | 2.23E-07      |  |
| rs28409215        | 118679304 | G/A       | 0.17 | 0.21    | I/I         | 0.80 (0.65-0.99)                  | 4.09E-02  | 0.75 (0.66-0.84) | 1.40E-06  | 0.56           | 0                     | 0.76 (0.66-0.88) | 2.29E-07      |  |
| rs10892293        | 118665575 | A/T       | 0.17 | 0.21    | I/I         | 0.80 (0.65-0.99)                  | 4.38E-02  | 0.75 (0.66-0.84) | 1.29E-06  | 0.55           | 0                     | 0.76 (0.66-0.88) | 2.30E-07      |  |
| rs4938572         | 118740931 | T/C       | 0.16 | 0.20    | I/I         | 0.82 (0.66-1.02)                  | 8.22E-02  | 0.73 (0.65-0.83) | 6.06E-07  | 0.38           | 0                     | 0.76 (0.65-0.88) | 2.60E-07      |  |
| rs7942535         | 118681464 | T/C       | 0.17 | 0.21    | I/I         | 0.79 (0.64-0.97)                  | 2.74E-02  | 0.76 (0.67-0.85) | 2.70E-06  | 0.75           | 0                     | 0.76 (0.66-0.88) | 2.62E-07      |  |
| rs11217060        | 118723748 | C/T       | 0.16 | 0.20    | I/I         | 0.80 (0.64-1.01)                  | 5.84E-02  | 0.74 (0.65-0.83) | 1.05E-06  | 0.51           | 0                     | 0.76 (0.65-0.88) | 2.69E-07      |  |
| rs75249660        | 118721565 | G/A       | 0.16 | 0.20    | I/I         | 0.77 (0.61-0.96)                  | 2.24E-02  | 0.75 (0.67-0.85) | 3.73E-06  | 0.87           | 0                     | 0.76 (0.65-0.88) | 2.84E-07      |  |
| rs7125066         | 118721699 | A/G       | 0.33 | 0.39    | I/I         | 0.86 (0.72-1.02)                  | 8.82E-02  | 0.78 (0.71-0.86) | 6.68E-07  | 0.39           | 0                     | 0.80 (0.71-0.90) | 3.06E-07      |  |
| rs9736016         | 118724894 | T/A       | 0.34 | 0.39    | I/I         | 0.85 (0.71-1.01)                  | 6.11E-02  | 0.79 (0.72-0.87) | 1.20E-06  | 0.51           | 0                     | 0.81 (0.72-0.91) | 3.17E-07      |  |
| rs10892279        | 118611781 | G/A       | 0.18 | 0.22    | O/O         | 0.81 (0.66-1.00)                  | 4.80E-02  | 0.75 (0.67-0.85) | 1.63E-06  | 0.53           | 0                     | 0.77 (0.67-0.89) | 3.17E-07      |  |
| rs11217041        | 118682350 | A/G       | 0.18 | 0.22    | I/I         | 0.80 (0.64-0.98)                  | 3.49E-02  | 0.76 (0.67-0.85) | 2.47E-06  | 0.67           | 0                     | 0.77 (0.66-0.88) | 3.17E-07      |  |
| rs11217036        | 118675772 | C/T       | 0.17 | 0.21    | I/I         | 0.79 (0.64-0.98)                  | 3.53E-02  | 0.75 (0.67-0.85) | 2.49E-06  | 0.66           | 0                     | 0.76 (0.66-0.88) | 3.25E-07      |  |
| rs11217032        | 118669605 | T/A       | 0.17 | 0.21    | I/I         | 0.81 (0.66-1.00)                  | 4.85E-02  | 0.75 (0.67-0.84) | 1.88E-06  | 0.54           | 0                     | 0.77 (0.66-0.89) | 3.65E-07      |  |
| rs11217044        | 118696022 | T/C       | 0.17 | 0.21    | I/I         | 0.78 (0.62-0.96)                  | 2.24E-02  | 0.76 (0.68-0.86) | 4.94E-06  | 0.88           | 0                     | 0.77 (0.66-0.88) | 3.69E-07      |  |
| rs11217042        | 118682528 | G/A       | 0.18 | 0.22    | I/I         | 0.80 (0.65-0.99)                  | 3.82E-02  | 0.76 (0.67-0.85) | 2.78E-06  | 0.66           | 0                     | 0.77 (0.67-0.89) | 3.92E-07      |  |
| rs56043232        | 118648373 | C/T       | 0.17 | 0.21    | I/I         | 0.80 (0.65-0.99)                  | 4.19E-02  | 0.75 (0.67-0.85) | 2.64E-06  | 0.60           | 0                     | 0.77 (0.67-0.89) | 4.21E-07      |  |
| chr11:118632321:D | 118632321 | indel/A   | 0.18 | 0.22    | I/I         | 0.82 (0.66-1.00)                  | 5.45E-02  | 0.75 (0.67-0.85) | 1.91E-06  | 0.51           | 0                     | 0.77 (0.67-0.89) | 4.28E-07      |  |
| rs7117313         | 118744396 | G/C       | 0.16 | 0.20    | I/I         | 0.83 (0.67-1.04)                  | 1.07E-01  | 0.74 (0.65-0.83) | 7.32E-07  | 0.32           | 0                     | 0.76 (0.66-0.89) | 4.38E-07      |  |
| rs11217066        | 118726753 | T/G       | 0.16 | 0.20    | I/I         | 0.81 (0.65-1.01)                  | 6.18E-02  | 0.75 (0.66-0.84) | 1.70E-06  | 0.52           | 0                     | 0.76 (0.66-0.89) | 4.45E-07      |  |
| rs10892290        | 118653503 | G/T       | 0.17 | 0.21    | I/I         | 0.82 (0.67-1.01)                  | 6.75E-02  | 0.75 (0.66-0.84) | 1.56E-06  | 0.44           | 0                     | 0.77 (0.67-0.89) | 4.65E-07      |  |
| rs10892291        | 118653517 | C/T       | 0.17 | 0.21    | I/I         | 0.82 (0.67-1.01)                  | 6.75E-02  | 0.75 (0.66-0.84) | 1.56E-06  | 0.44           | 0                     | 0.77 (0.67-0.89) | 4.65E-07      |  |
| rs55894437        | 118607417 | C/T       | 0.18 | 0.22    | I/I         | 0.81 (0.66-1.00)                  | 5.03E-02  | 0.76 (0.67-0.85) | 2.46E-06  | 0.54           | 0                     | 0.77 (0.67-0.89) | 4.92E-07      |  |
| rs3889239         | 118619960 | C/T       | 0.17 | 0.21    | I/I         | 0.82 (0.67-1.02)                  | 6.95E-02  | 0.75 (0.67-0.84) | 1.64E-06  | 0.44           | 0                     | 0.77 (0.67-0.89) | 5.05E-07      |  |
| rs56758835        | 118615340 | G/A       | 0.17 | 0.21    | I/I         | 0.82 (0.67-1.01)                  | 6.69E-02  | 0.75 (0.67-0.84) | 1.74E-06  | 0.44           | 0                     | 0.77 (0.67-0.89) | 5.09E-07      |  |
| rs11217009        | 118615785 | C/T       | 0.17 | 0.21    | I/I         | 0.82 (0.67-1.01)                  | 6.69E-02  | 0.75 (0.67-0.84) | 1.77E-06  | 0.45           | 0                     | 0.77 (0.67-0.89) | 5.14E-07      |  |
| rs76409436        | 118607871 | G/A       | 0.18 | 0.22    | I/I         | 0.82 (0.66-1.00)                  | 5.38E-02  | 0.75 (0.67-0.85) | 2.38E-06  | 0.53           | 0                     | 0.77 (0.67-0.89) | 5.15E-07      |  |
| rs56267528        | 118607311 | C/A       | 0.18 | 0.22    | I/I         | 0.81 (0.66-1.00)                  | 5.22E-02  | 0.76 (0.67-0.85) | 2.48E-06  | 0.53           | 0                     | 0.77 (0.67-0.89) | 5.18E-07      |  |
| rs11217038        | 118677355 | G/A       | 0.17 | 0.21    | I/I         | 0.80 (0.65-0.99)                  | 4.34E-02  | 0.76 (0.67-0.85) | 3.29E-06  | 0.61           | 0                     | 0.77 (0.67-0.89) | 5.30E-07      |  |
| rs11217002        | 118607150 | C/T       | 0.18 | 0.22    | I/I         | 0.81 (0.66-1.00)                  | 5.03E-02  | 0.76 (0.67-0.85) | 2.71E-06  | 0.55           | 0                     | 0.77 (0.67-0.89) | 5.37E-07      |  |
| rs7123726         | 118694547 | T/C       | 0.16 | 0.20    | I/I         | 0.77 (0.62-0.97)                  | 2.34E-02  | 0.76 (0.67-0.86) | 7.22E-06  | 0.91           | 0                     | 0.76 (0.66-0.89) | 5.52E-07      |  |
| rs10892292        | 118655340 | G/C       | 0.17 | 0.21    | I/I         | 0.82 (0.67-1.01)                  | 6.75E-02  | 0.75 (0.67-0.84) | 1.96E-06  | 0.46           | 0                     | 0.77 (0.67-0.89) | 5.69E-07      |  |
| rs874621          | 118655645 | G/A       | 0.17 | 0.21    | I/I         | 0.82 (0.67-1.01)                  | 6.78E-02  | 0.75 (0.67-0.84) | 2.00E-06  | 0.46           | 0                     | 0.77 (0.67-0.89) | 5.82E-07      |  |
| rs10892289        | 118646003 | C/T       | 0.17 | 0.21    | I/I         | 0.81 (0.66-1.00)                  | 5.35E-02  | 0.75 (0.67-0.85) | 2.80E-06  | 0.54           | 0                     | 0.77 (0.67-0.89) | 5.91E-07      |  |
| chr11:118608387:D | 118608387 | CTTTG/C   | 0.18 | 0.22    | I/I         | 0.82 (0.66-1.00)                  | 5.57E-02  | 0.76 (0.67-0.85) | 2.79E-06  | 0.52           | 0                     | 0.77 (0.67-0.89) | 6.23E-07      |  |
| rs11217006        | 118609790 | G/A       | 0.18 | 0.22    | I/I         | 0.82 (0.66-1.00)                  | 5.28E-02  | 0.76 (0.68-0.85) | 3.08E-06  | 0.55           | 0                     | 0.77 (0.67-0.89) | 6.34E-07      |  |
| rs11826521        | 118610549 | G/T       | 0.17 | 0.21    | I/I         | 0.82 (0.67-1.01)                  | 6.42E-02  | 0.75 (0.67-0.85) | 2.62E-06  | 0.49           | 0                     | 0.77 (0.67-0.89) | 6.93E-07      |  |
| rs73003215        | 118649512 | G/A       | 0.18 | 0.22    | I/I         | 0.81 (0.65-0.99)                  | 4.21E-02  | 0.76 (0.68-0.85) | 4.55E-06  | 0.63           | 0                     | 0.77 (0.67-0.89) | 6.97E-07      |  |
| rs7945144         | 118608716 | A/G       | 0.18 | 0.22    | I/I         | 0.81 (0.66-1.00)                  | 5.10E-02  | 0.76 (0.68-0.85) | 3.62E-06  | 0.57           | 0                     | 0.77 (0.67-0.89) | 7.06E-07      |  |
| rs10892288        | 118644694 | A/G       | 0.17 | 0.21    | I/I         | 0.81 (0.66-1.00)                  | 5.35E-02  | 0.76 (0.67-0.85) | 3.63E-06  | 0.56           | 0                     | 0.77 (0.67-0.89) | 7.46E-07      |  |
| rs10892280        | 118611817 | C/T       | 0.17 | 0.21    | O/O         | 0.82 (0.67-1.01)                  | 6.68E-02  | 0.75 (0.67-0.85) | 2.79E-06  | 0.48           | 0                     | 0.77 (0.67-0.89) | 7.70E-07      |  |
| rs10892283        | 118636980 | A/G       | 0.17 | 0.21    | I/I         | 0.81 (0.66-1.00)                  | 5.35E-02  | 0.76 (0.67-0.85) | 3.79E-06  | 0.57           | 0                     | 0.77 (0.67-0.89) | 7.74E-07      |  |
| rs11217019        | 118636343 | C/A       | 0.17 | 0.21    | I/I         | 0.81 (0.66-1.00)                  | 5.35E-02  | 0.76 (0.67-0.85) | 3.79E-06  | 0.57           | 0                     | 0.77 (0.67-0.89) | 7.74E-07      |  |
| rs12364971        | 118607794 | T/G       | 0.18 | 0.22    | I/I         | 0.81 (0.66-1.00)                  | 5.05E-02  | 0.76 (0.68-0.85) | 4.05E-06  | 0.57           | 0                     | 0.77 (0.67-0.89) | 7.74E-07      |  |
| rs10892286        | 118642085 | A/C       | 0.17 | 0.21    | I/I         | 0.82 (0.67-1.01)                  | 6.37E-02  | 0.76 (0.67-0.85) | 3.13E-06  | 0.50           | 0                     | 0.77 (0.67-0.89) | 8.07E-07      |  |
| rs1048024         | 118618776 | A/T       | 0.17 | 0.21    | I/I         | 0.82 (0.67-1.01)                  | 6.66E-02  | 0.76 (0.67-0.85) | 3.15E-06  | 0.49           | 0                     | 0.77 (0.67-0.89) | 8.55E-07      |  |
| rs80065107        | 118682767 | T/C       | 0.18 | 0.22    | I/I         | 0.81 (0.65-1.00)                  | 4.72E-02  | 0.76 (0.68-0.86) | 5.21E-06  | 0.65           | 0                     | 0.78 (0.67-0.89) | 8.85E-07      |  |
| rs2004781         | 118619253 | C/T       | 0.17 | 0.21    | I/I         | 0.82 (0.67-1.01)                  | 6.93E-02  | 0.76 (0.67-0.85) | 3.14E-06  | 0.48           | 0                     | 0.77 (0.67-0.89) | 8.94E-07      |  |

**Supplementary Table 11.** Association analysis in CXCR5

| SNP               | BP        | Alleles   |      | MAF     |             | Observed or Imputed in Dataset1/2 | Dataset 1 |                  | Dataset 2 |                | Test of heterogeneity |                  | Meta analysis |  |
|-------------------|-----------|-----------|------|---------|-------------|-----------------------------------|-----------|------------------|-----------|----------------|-----------------------|------------------|---------------|--|
|                   |           | maj / min | Case | Control | OR (95% CI) |                                   | P         | OR (95% CI)      | P         | P <sub>Q</sub> | I <sup>2</sup>        | OR (95% CI)      | P             |  |
|                   |           |           |      |         |             |                                   |           |                  |           |                |                       |                  |               |  |
| rs11217037        | 118677086 | G/A       | 0.18 | 0.21    | I/I         | 0.80 (0.65-0.99)                  | 4.34E-02  | 0.76 (0.68-0.86) | 6.09E-06  | 0.66           | 0                     | 0.77 (0.67-0.89) | 9.28E-07      |  |
| rs6589685         | 118612197 | T/C       | 0.18 | 0.22    | I/I         | 0.82 (0.67-1.01)                  | 6.01E-02  | 0.76 (0.68-0.86) | 4.31E-06  | 0.55           | 0                     | 0.78 (0.68-0.90) | 9.95E-07      |  |
| rs74676029        | 118628373 | C/T       | 0.16 | 0.20    | I/I         | 0.81 (0.65-1.01)                  | 5.80E-02  | 0.75 (0.66-0.85) | 4.58E-06  | 0.53           | 0                     | 0.77 (0.66-0.89) | 1.02E-06      |  |
| rs10892287        | 118642999 | T/C       | 0.17 | 0.21    | I/I         | 0.82 (0.66-1.01)                  | 5.86E-02  | 0.76 (0.68-0.86) | 4.69E-06  | 0.56           | 0                     | 0.78 (0.67-0.90) | 1.05E-06      |  |
| rs6589681         | 118606521 | C/T       | 0.18 | 0.22    | I/I         | 0.82 (0.67-1.01)                  | 6.04E-02  | 0.76 (0.68-0.86) | 4.69E-06  | 0.53           | 0                     | 0.78 (0.67-0.90) | 1.10E-06      |  |
| rs57494551        | 118661398 | C/T       | 0.17 | 0.21    | I/I         | 0.82 (0.67-1.01)                  | 6.72E-02  | 0.76 (0.67-0.85) | 4.37E-06  | 0.51           | 0                     | 0.78 (0.67-0.90) | 1.16E-06      |  |
| rs77209083        | 118607569 | A/G       | 0.18 | 0.21    | I/I         | 0.82 (0.67-1.01)                  | 6.31E-02  | 0.77 (0.68-0.86) | 8.85E-06  | 0.57           | 0                     | 0.78 (0.68-0.90) | 2.03E-06      |  |
| rs11217001        | 118607046 | G/A       | 0.18 | 0.21    | I/I         | 0.82 (0.67-1.01)                  | 6.31E-02  | 0.77 (0.68-0.86) | 9.52E-06  | 0.58           | 0                     | 0.78 (0.68-0.90) | 2.17E-06      |  |
| rs6589686         | 118612565 | G/A       | 0.16 | 0.20    | I/I         | 0.80 (0.64-1.00)                  | 4.51E-02  | 0.77 (0.68-0.86) | 1.67E-05  | 0.72           | 0                     | 0.78 (0.67-0.90) | 2.42E-06      |  |
| chr11:118660641:D | 118660641 | indel/A   | 0.17 | 0.21    | I/I         | 0.82 (0.66-1.01)                  | 6.26E-02  | 0.77 (0.68-0.86) | 1.17E-05  | 0.61           | 0                     | 0.78 (0.68-0.90) | 2.56E-06      |  |
| chr11:118662993:D | 118662993 | TTAC/T    | 0.17 | 0.20    | I/I         | 0.83 (0.67-1.03)                  | 9.84E-02  | 0.76 (0.67-0.86) | 7.46E-06  | 0.46           | 0                     | 0.78 (0.67-0.90) | 2.94E-06      |  |
| chr11:118739395:D | 118739395 | AAG/A     | 0.41 | 0.36    | I/I         | 1.16 (0.98-1.38)                  | 7.94E-02  | 1.21 (1.10-1.33) | 6.23E-05  | 0.68           | 0                     | 1.20 (1.07-1.35) | 1.52E-05      |  |
| rs12790489        | 118729583 | T/C       | 0.41 | 0.36    | I/I         | 1.14 (0.97-1.36)                  | 1.19E-01  | 1.22 (1.10-1.34) | 5.59E-05  | 0.54           | 0                     | 1.19 (1.06-1.34) | 2.23E-05      |  |
| rs7127565         | 118734521 | A/T       | 0.41 | 0.36    | I/I         | 1.16 (0.98-1.37)                  | 8.71E-02  | 1.21 (1.10-1.33) | 1.07E-04  | 0.68           | 0                     | 1.19 (1.06-1.34) | 2.79E-05      |  |
| rs7929520         | 118730141 | A/G       | 0.42 | 0.37    | I/I         | 1.13 (0.95-1.34)                  | 1.58E-01  | 1.21 (1.10-1.33) | 5.01E-05  | 0.46           | 0                     | 1.19 (1.06-1.33) | 2.82E-05      |  |
| rs10892300        | 118729210 | C/T       | 0.41 | 0.37    | I/I         | 1.13 (0.95-1.34)                  | 1.62E-01  | 1.21 (1.10-1.33) | 5.02E-05  | 0.46           | 0                     | 1.19 (1.06-1.33) | 2.93E-05      |  |
| rs11217070        | 118729860 | T/G       | 0.41 | 0.37    | I/I         | 1.14 (0.96-1.35)                  | 1.38E-01  | 1.21 (1.10-1.33) | 6.58E-05  | 0.53           | 0                     | 1.19 (1.06-1.33) | 3.04E-05      |  |
| rs4938571         | 118731488 | G/A       | 0.41 | 0.37    | I/I         | 1.13 (0.96-1.34)                  | 1.45E-01  | 1.21 (1.10-1.33) | 6.49E-05  | 0.50           | 0                     | 1.19 (1.06-1.33) | 3.22E-05      |  |
| rs4936442         | 118728320 | C/T       | 0.41 | 0.37    | I/I         | 1.14 (0.97-1.36)                  | 1.19E-01  | 1.20 (1.10-1.32) | 1.01E-04  | 0.60           | 0                     | 1.19 (1.06-1.33) | 3.72E-05      |  |
| rs57719838        | 118724723 | T/C       | 0.41 | 0.37    | I/I         | 1.15 (0.97-1.36)                  | 1.19E-01  | 1.20 (1.09-1.32) | 1.29E-04  | 0.63           | 0                     | 1.18 (1.06-1.33) | 4.60E-05      |  |
| rs10790267        | 118727169 | C/T       | 0.41 | 0.37    | I/I         | 1.15 (0.97-1.37)                  | 9.85E-02  | 1.20 (1.09-1.31) | 1.65E-04  | 0.71           | 0                     | 1.18 (1.06-1.33) | 4.65E-05      |  |
| rs34561290        | 118731599 | C/T       | 0.41 | 0.37    | I/I         | 1.13 (0.95-1.34)                  | 1.61E-01  | 1.20 (1.10-1.32) | 1.02E-04  | 0.51           | 0                     | 1.18 (1.05-1.32) | 5.42E-05      |  |
| rs11217063        | 118725942 | G/C       | 0.41 | 0.37    | I/I         | 1.14 (0.96-1.35)                  | 1.24E-01  | 1.20 (1.09-1.31) | 1.63E-04  | 0.63           | 0                     | 1.18 (1.05-1.32) | 5.96E-05      |  |
| chr11:118729012:D | 118729012 | AG/A      | 0.41 | 0.37    | I/I         | 1.14 (0.96-1.35)                  | 1.30E-01  | 1.20 (1.09-1.31) | 1.70E-04  | 0.62           | 0                     | 1.18 (1.05-1.32) | 6.53E-05      |  |
| rs11217065        | 118726647 | T/C       | 0.41 | 0.37    | I/I         | 1.14 (0.96-1.35)                  | 1.25E-01  | 1.20 (1.09-1.31) | 1.90E-04  | 0.64           | 0                     | 1.18 (1.05-1.32) | 6.95E-05      |  |
| rs7945578         | 118725005 | T/G       | 0.41 | 0.37    | I/I         | 1.14 (0.96-1.35)                  | 1.27E-01  | 1.19 (1.08-1.31) | 2.91E-04  | 0.68           | 0                     | 1.18 (1.05-1.32) | 1.04E-04      |  |
| rs7483509         | 118740180 | G/A       | 0.41 | 0.36    | I/I         | 1.13 (0.96-1.34)                  | 1.51E-01  | 1.19 (1.08-1.31) | 2.86E-04  | 0.60           | 0                     | 1.17 (1.05-1.32) | 1.25E-04      |  |
| chr11:118582915:I | 118582915 | A/AGC     | 0.19 | 0.22    | I/I         | 0.88 (0.72-1.08)                  | 2.38E-01  | 0.80 (0.71-0.90) | 1.91E-04  | 0.41           | 0                     | 0.82 (0.72-0.95) | 1.51E-04      |  |
| rs11216972        | 118585826 | C/T       | 0.20 | 0.23    | I/I         | 0.87 (0.71-1.06)                  | 1.58E-01  | 0.82 (0.73-0.92) | 6.18E-04  | 0.63           | 0                     | 0.83 (0.72-0.96) | 2.63E-04      |  |
| rs11216994        | 118603520 | C/T       | 0.19 | 0.22    | I/I         | 0.86 (0.70-1.06)                  | 1.68E-01  | 0.83 (0.74-0.93) | 1.01E-03  | 0.72           | 0                     | 0.84 (0.73-0.96) | 4.30E-04      |  |
| rs11216995        | 118603526 | G/A       | 0.19 | 0.22    | I/I         | 0.86 (0.70-1.06)                  | 1.68E-01  | 0.83 (0.74-0.93) | 1.01E-03  | 0.72           | 0                     | 0.84 (0.73-0.96) | 4.30E-04      |  |
| chr11:118582913:I | 118582913 | A/ACAG    | 0.20 | 0.23    | I/I         | 0.89 (0.73-1.09)                  | 2.71E-01  | 0.82 (0.73-0.92) | 7.10E-04  | 0.47           | 0                     | 0.84 (0.73-0.97) | 5.52E-04      |  |
| rs112561833       | 118603736 | A/C       | 0.19 | 0.22    | I/I         | 0.87 (0.70-1.07)                  | 1.79E-01  | 0.83 (0.74-0.93) | 1.44E-03  | 0.74           | 0                     | 0.84 (0.73-0.97) | 6.32E-04      |  |
| rs10892271        | 118598544 | G/A       | 0.19 | 0.22    | I/I         | 0.86 (0.70-1.07)                  | 1.73E-01  | 0.83 (0.74-0.93) | 1.54E-03  | 0.75           | 0                     | 0.84 (0.73-0.97) | 6.53E-04      |  |
| rs11216997        | 118604638 | C/T       | 0.19 | 0.22    | I/I         | 0.87 (0.70-1.07)                  | 1.78E-01  | 0.83 (0.74-0.93) | 1.54E-03  | 0.75           | 0                     | 0.84 (0.73-0.97) | 6.71E-04      |  |
| rs497916          | 118758089 | C/T       | 0.26 | 0.29    | O/O         | 0.76 (0.63-0.92)                  | 5.13E-03  | 0.89 (0.80-0.98) | 2.40E-02  | 0.17           | 48                    | 0.85 (0.75-0.97) | 6.74E-04      |  |
| chr11:118736237:I | 118736237 | CG/C      | 0.41 | 0.45    | I/I         | 0.89 (0.75-1.05)                  | 1.76E-01  | 0.86 (0.78-0.95) | 1.85E-03  | 0.73           | 0                     | 0.87 (0.78-0.98) | 7.89E-04      |  |
| rs12421790        | 118588952 | C/T       | 0.18 | 0.21    | I/I         | 0.86 (0.70-1.06)                  | 1.66E-01  | 0.83 (0.74-0.94) | 2.17E-03  | 0.79           | 0                     | 0.84 (0.73-0.97) | 8.53E-04      |  |
| rs10892273        | 118602809 | G/A       | 0.20 | 0.22    | I/I         | 0.86 (0.70-1.06)                  | 1.71E-01  | 0.84 (0.75-0.94) | 2.12E-03  | 0.80           | 0                     | 0.84 (0.73-0.97) | 8.61E-04      |  |
| rs11216985        | 118591776 | C/T       | 0.19 | 0.21    | I/I         | 0.87 (0.70-1.07)                  | 1.87E-01  | 0.83 (0.74-0.93) | 1.95E-03  | 0.74           | 0                     | 0.84 (0.73-0.97) | 8.78E-04      |  |
| rs10892262        | 118587097 | G/C       | 0.19 | 0.22    | I/I         | 0.85 (0.69-1.05)                  | 1.30E-01  | 0.84 (0.75-0.94) | 3.00E-03  | 0.92           | 0                     | 0.84 (0.73-0.97) | 9.98E-04      |  |
| rs10892260        | 118583525 | A/C       | 0.21 | 0.24    | I/I         | 0.86 (0.70-1.04)                  | 1.28E-01  | 0.85 (0.76-0.95) | 3.36E-03  | 0.91           | 0                     | 0.85 (0.74-0.97) | 9.91E-04      |  |
| rs11216981        | 118590805 | C/G       | 0.19 | 0.21    | I/I         | 0.84 (0.68-1.05)                  | 1.23E-01  | 0.84 (0.75-0.95) | 3.59E-03  | 0.97           | 0                     | 0.84 (0.73-0.97) | 1.01E-03      |  |
| rs10892258        | 118579865 | G/A       | 0.21 | 0.24    | I/I         | 0.87 (0.72-1.06)                  | 1.63E-01  | 0.84 (0.75-0.94) | 2.72E-03  | 0.79           | 0                     | 0.85 (0.74-0.97) | 1.03E-03      |  |
| rs75582746        | 118588102 | T/G       | 0.19 | 0.21    | I/I         | 0.85 (0.69-1.05)                  | 1.40E-01  | 0.84 (0.75-0.94) | 3.41E-03  | 0.92           | 0                     | 0.84 (0.73-0.97) | 1.09E-03      |  |
| rs10892263        | 118587319 | T/C       | 0.19 | 0.21    | I/I         | 0.86 (0.69-1.06)                  | 1.54E-01  | 0.84 (0.75-0.94) | 3.28E-03  | 0.87           | 0                     | 0.84 (0.73-0.97) | 1.16E-03      |  |
| chr11:118602732:D | 118602732 | TG/T      | 0.20 | 0.22    | I/I         | 0.86 (0.70-1.06)                  | 1.70E-01  | 0.84 (0.75-0.94) | 3.19E-03  | 0.84           | 0                     | 0.85 (0.74-0.98) | 1.24E-03      |  |
| rs10892272        | 118602707 | C/G       | 0.20 | 0.22    | I/I         | 0.87 (0.70-1.07)                  | 1.83E-01  | 0.84 (0.75-0.94) | 3.14E-03  | 0.82           | 0                     | 0.85 (0.74-0.98) | 1.32E-03      |  |
| rs11216956        | 118575326 | G/A       | 0.21 | 0.24    | I/I         | 0.88 (0.72-1.07)                  | 1.90E-01  | 0.84 (0.76-0.94) | 3.08E-03  | 0.74           | 0                     | 0.85 (0.75-0.98) | 1.36E-03      |  |
| chr11:118577557:D | 118577557 | AT/A      | 0.21 | 0.24    | I/I         | 0.87 (0.72-1.06)                  | 1.65E-01  | 0.85 (0.76-0.95) | 3.91E-03  | 0.83           | 0                     | 0.86 (0.75-0.98) | 1.46E-03      |  |
| rs11216969        | 118584340 | T/C       | 0.21 | 0.24    | I/I         | 0.87 (0.71-1.05)                  | 1.51E-01  | 0.85 (0.76-0.95) | 4.32E-03  | 0.87           | 0                     | 0.85 (0.75-0.98) | 1.47E-03      |  |
| rs10892257        | 118579327 | G/A       | 0.21 | 0.24    | I/I         | 0.87 (0.72-1.06)                  | 1.71E-01  | 0.85 (0.76-0.95) | 3.94E-03  | 0.82           | 0                     | 0.86 (0.75-0.98) | 1.52E-03      |  |
| rs10892264        | 118590714 | G/A       | 0.19 | 0.21    | I/I         | 0.85 (0.68-1.05)                  | 1.24E-01  | 0.85 (0.76-0.95) | 5.49E-03  | 0.98           | 0                     | 0.85 (0.73-0.98) | 1.53E-03      |  |
| rs10892256        | 118578705 | G/A       | 0.21 | 0.24    | I/I         | 0.87 (0.71-1.06)                  | 1.58E-01  | 0.85 (0.76-0.95) | 4.41E-03  | 0.86           | 0                     | 0.86 (0.75-0.98) | 1.57E-03      |  |
| chr11:118580965:I | 118580965 | C/CTTTA   | 0.21 | 0.24    | I/I         | 0.87 (0.72-1.06)                  | 1.63E-01  | 0.85 (0.76-0.95) | 4.29E-03  | 0.84           | 0                     | 0.86 (0.75-0.98) | 1.57E-03      |  |
| rs11216961        | 118580338 | C/G       | 0.21 | 0.24    | I/I         | 0.87 (0.72-1.06)                  | 1.63E-01  | 0.85 (0.76-0.95) | 4.29E-03  | 0.84           | 0                     | 0.86 (0.75-0.98) | 1.57E-03      |  |
| chr11:118581769:D | 118581769 | TTTTG/T   | 0.21 | 0.24    | I/I         | 0.86 (0.71-1.05)                  | 1.47E-01  | 0.85 (0.76-0.95) | 4.81E-03  | 0.90           | 0                     | 0.86 (0.75-0.98) | 1.58E-03      |  |
| rs11216964        | 118581895 | G/A       | 0.21 | 0.24    | I/I         | 0.87 (0.72-1.06)                  | 1.63E-01  | 0.85 (0.76-0.95) | 4.32E-03  | 0.85           | 0                     | 0.86 (0.75-0.98) | 1.58E-03      |  |
| rs11216965        | 118582613 | C/A       | 0.21 | 0.24    | I/I         | 0.87 (0.72-1.06)                  | 1.63E-01  | 0.85 (0.76-0.95) | 4.32E-03  | 0.85           | 0                     | 0.86 (0.75-0.98) | 1.58E-03      |  |
| rs10892259        | 118583002 | G/A       | 0.21 | 0.24    | I/I         | 0.87 (0.72-1.06)                  | 1.63E-01  | 0.85 (0.76-0.95) | 4.32E-03  | 0.84           | 0                     | 0.86 (0.75-0.98) | 1.58E-03      |  |
| rs11216962        | 118580813 | T/C       | 0.21 | 0.24    | I/I         | 0.87 (0.71-1.05)                  | 1.51E-01  | 0.85 (0.76-0.95) | 5.24E-03  | 0.90           | 0                     | 0.86 (0.75-0.98) | 1.76E-03      |  |
| rs11216963        | 118580814 | G/A       | 0.21 | 0.24    | I/I         | 0.87 (0.71-1.05)                  | 1.51E-01  | 0.85 (0.76-0.95) | 5.24E-03  | 0.90           | 0                     | 0.86 (0.75-0.98) | 1.76E-03      |  |
| rs61901411        | 118665324 | C/T       | 0.13 | 0.12    | I/I         | 1.13 (0.88-1.45)                  | 3.45E-01  | 1.24 (1.08-1.43) | 2.35E-03  | 0.51           | 0                     | 1.21 (1.02-1.43) | 2.07E-03      |  |
| rs3176912         | 118757788 | G/A       | 0.03 | 0.02    | I/I         | 1.17 (0.66-2.09)                  | 5.89E-01  | 1.61 (1.21-2.13) | 1.00E-03  | 0.34           | 0                     | 1.47 (1.02-2.12) | 2.09E-03      |  |
| rs11216960        | 118577873 | G/A       | 0.21 | 0.24    | I/I         | 0.87 (0.71-1.06)                  | 1.58E-01  | 0.86 (0.77-0.96) | 6.77E-03  | 0.91           | 0                     | 0.86 (0.75-0.99) | 2.34E-03      |  |
| rs613791          | 118764051 | C/T       | 0.25 | 0.28    | O/O         | 0.82 (0.68-0.99)                  | 4.18E-02  | 0.89 (0.80-0.98) | 2.22E-02  | 0.51           | 0                     | 0.87 (0.76-0.99) | 2.53E-03      |  |
| rs598373          | 118664377 | C/T       | 0.30 | 0.34    | I/I         | 0.90 (0.76-1.07)                  | 2.21E-01  | 0.87 (0.79-0.96) | 5.28E-03  | 0.74           | 0                     | 0.88 (0.78-0.99) | 2.58E-03      |  |
| rs581062          | 118624767 | G/A       | 0.31 | 0.34    | I/I         | 0.89 (0.75-1.05)                  | 1.77E-01  | 0.88 (0.79-0.97) | 7.62E-03  | 0.89           | 0                     | 0.88 (0.78-0.99) | 2.90E-03      |  |
| rs2508916         | 118654651 | C/G       | 0.31 | 0.34    | I/I         | 0.89 (0.75-1.06)                  | 2.05E-01  | 0.87 (0.79-0.96) | 6.99E-    |                |                       |                  |               |  |

**Supplementary Table 11.** Association analysis in *CXCR5*

| SNP               | BP        | Alleles  |      | MAF  | Observed or Imputed in Dataset1/2 | Dataset 1        |             | Dataset 2        |             | Test of heterogeneity |                | Meta analysis    |             |
|-------------------|-----------|----------|------|------|-----------------------------------|------------------|-------------|------------------|-------------|-----------------------|----------------|------------------|-------------|
|                   |           | maj/ min | Case |      |                                   | Control          | OR (95% CI) | P                | OR (95% CI) | P                     | P <sub>Q</sub> | I <sup>2</sup>   | OR (95% CI) |
|                   |           |          |      |      |                                   |                  |             |                  |             |                       |                |                  |             |
| chr11:118620859:D | 118620859 | AAAAT/A  | 0.45 | 0.42 | I/I                               | 1.08 (0.92-1.28) | 3.35E-01    | 1.15 (1.04-1.26) | 4.13E-03    | 0.57                  | 0              | 1.13 (1.01-1.26) | 3.27E-03    |
| rs524590          | 118640063 | A/T      | 0.31 | 0.34 | I/I                               | 0.89 (0.75-1.05) | 1.69E-01    | 0.88 (0.80-0.97) | 9.23E-03    | 0.93                  | 0              | 0.88 (0.78-0.99) | 3.32E-03    |
| rs4938544         | 118665009 | G/A      | 0.13 | 0.12 | I/I                               | 1.09 (0.85-1.40) | 5.00E-01    | 1.24 (1.08-1.42) | 2.65E-03    | 0.38                  | 0              | 1.19 (1.01-1.42) | 3.68E-03    |
| rs540180          | 118653629 | G/T      | 0.31 | 0.34 | I/I                               | 0.90 (0.76-1.07) | 2.30E-01    | 0.88 (0.79-0.97) | 7.52E-03    | 0.79                  | 0              | 0.88 (0.78-0.99) | 3.70E-03    |
| rs487728          | 118621495 | C/G      | 0.31 | 0.34 | I/I                               | 0.89 (0.75-1.06) | 1.88E-01    | 0.88 (0.80-0.97) | 9.60E-03    | 0.90                  | 0              | 0.88 (0.78-0.99) | 3.81E-03    |
| chr11:118679465:D | 118679465 | C/CAACT  | 0.31 | 0.34 | I/I                               | 0.88 (0.74-1.05) | 1.60E-01    | 0.88 (0.80-0.97) | 1.14E-02    | 0.98                  | 0              | 0.88 (0.78-0.99) | 3.84E-03    |
| rs516719          | 118679445 | T/C      | 0.31 | 0.34 | I/I                               | 0.88 (0.74-1.05) | 1.58E-01    | 0.88 (0.80-0.97) | 1.17E-02    | 0.99                  | 0              | 0.88 (0.78-0.99) | 3.91E-03    |
| rs1790189         | 118652326 | T/G      | 0.31 | 0.34 | I/I                               | 0.89 (0.75-1.06) | 2.03E-01    | 0.88 (0.80-0.97) | 9.26E-03    | 0.86                  | 0              | 0.88 (0.78-0.99) | 3.96E-03    |
| chr11:118642729:D | 118642729 | GT/G     | 0.44 | 0.41 | I/I                               | 1.07 (0.91-1.26) | 4.02E-01    | 1.14 (1.04-1.25) | 4.15E-03    | 0.50                  | 0              | 1.12 (1.00-1.26) | 4.05E-03    |
| rs11217078        | 118750321 | T/C      | 0.31 | 0.34 | O/O                               | 0.98 (0.83-1.17) | 8.40E-01    | 0.85 (0.77-0.94) | 1.09E-03    | 0.15                  | 53             | 0.89 (0.79-1.00) | 4.06E-03    |
| rs473298          | 118679387 | A/G      | 0.31 | 0.34 | I/I                               | 0.89 (0.74-1.05) | 1.70E-01    | 0.88 (0.80-0.97) | 1.21E-02    | 0.97                  | 0              | 0.88 (0.78-0.99) | 4.30E-03    |
| rs477014          | 118678986 | T/C      | 0.31 | 0.34 | I/I                               | 0.89 (0.74-1.05) | 1.70E-01    | 0.88 (0.80-0.97) | 1.26E-02    | 0.98                  | 0              | 0.88 (0.78-1.00) | 4.48E-03    |
| rs582200          | 118668908 | A/G      | 0.13 | 0.12 | I/I                               | 1.10 (0.86-1.41) | 4.46E-01    | 1.22 (1.07-1.40) | 4.14E-03    | 0.46                  | 0              | 1.19 (1.00-1.41) | 4.58E-03    |
| chr11:118653803:D | 118653803 | A/AAAGT  | 0.31 | 0.34 | I/I                               | 0.89 (0.75-1.06) | 2.05E-01    | 0.88 (0.80-0.97) | 1.13E-02    | 0.88                  | 0              | 0.88 (0.79-1.00) | 4.82E-03    |
| rs488219          | 118620697 | T/C      | 0.45 | 0.41 | O/O                               | 1.07 (0.91-1.25) | 4.42E-01    | 1.14 (1.04-1.25) | 4.61E-03    | 0.47                  | 0              | 1.12 (1.00-1.25) | 5.01E-03    |
| rs61901410        | 118661197 | C/G      | 0.13 | 0.12 | I/I                               | 1.10 (0.86-1.40) | 4.69E-01    | 1.22 (1.06-1.40) | 4.41E-03    | 0.45                  | 0              | 1.19 (1.00-1.40) | 5.14E-03    |
| chr11:118642006:D | 118642006 | TC/T     | 0.44 | 0.41 | I/I                               | 1.08 (0.91-1.27) | 3.82E-01    | 1.14 (1.04-1.25) | 6.00E-03    | 0.56                  | 0              | 1.12 (1.00-1.25) | 5.25E-03    |
| rs591756          | 118678881 | C/T      | 0.31 | 0.34 | I/I                               | 0.89 (0.74-1.05) | 1.70E-01    | 0.89 (0.80-0.98) | 1.49E-02    | 1.00                  | 0              | 0.89 (0.79-1.00) | 5.25E-03    |
| rs2508570         | 118678609 | G/A      | 0.31 | 0.34 | I/I                               | 0.89 (0.74-1.05) | 1.70E-01    | 0.89 (0.80-0.98) | 1.61E-02    | 0.99                  | 0              | 0.89 (0.79-1.00) | 5.63E-03    |
| rs546393          | 118624250 | T/C      | 0.45 | 0.41 | I/I                               | 1.07 (0.91-1.26) | 3.89E-01    | 1.14 (1.04-1.25) | 6.53E-03    | 0.56                  | 0              | 1.12 (1.00-1.25) | 5.75E-03    |
| rs500254          | 118678780 | A/G      | 0.13 | 0.12 | I/I                               | 1.10 (0.86-1.41) | 4.39E-01    | 1.22 (1.06-1.40) | 5.60E-03    | 0.50                  | 0              | 1.18 (1.00-1.40) | 5.79E-03    |
| rs566733          | 118608625 | C/G      | 0.45 | 0.41 | I/I                               | 1.07 (0.91-1.26) | 4.04E-01    | 1.14 (1.04-1.25) | 6.30E-03    | 0.54                  | 0              | 1.12 (1.00-1.25) | 5.85E-03    |
| rs5006102         | 118662340 | T/A      | 0.13 | 0.12 | I/I                               | 1.11 (0.87-1.42) | 4.15E-01    | 1.21 (1.06-1.40) | 6.19E-03    | 0.53                  | 0              | 1.18 (1.00-1.40) | 5.92E-03    |
| rs4508234         | 118662203 | C/G      | 0.13 | 0.12 | I/I                               | 1.11 (0.87-1.42) | 4.17E-01    | 1.21 (1.05-1.39) | 6.49E-03    | 0.53                  | 0              | 1.18 (1.00-1.40) | 6.19E-03    |
| rs632124          | 118613235 | T/A      | 0.45 | 0.41 | I/I                               | 1.07 (0.91-1.26) | 4.14E-01    | 1.14 (1.03-1.24) | 6.94E-03    | 0.54                  | 0              | 1.12 (1.00-1.25) | 6.51E-03    |
| rs555639          | 118629031 | G/A      | 0.45 | 0.41 | I/I                               | 1.07 (0.91-1.26) | 4.02E-01    | 1.13 (1.03-1.24) | 7.39E-03    | 0.55                  | 0              | 1.12 (1.00-1.25) | 6.64E-03    |
| rs7933859         | 118662045 | C/T      | 0.13 | 0.12 | I/I                               | 1.11 (0.87-1.42) | 4.17E-01    | 1.21 (1.05-1.39) | 7.06E-03    | 0.54                  | 0              | 1.18 (1.00-1.40) | 6.65E-03    |
| rs543824          | 118762218 | A/G      | 0.23 | 0.25 | I/I                               | 0.82 (0.67-0.99) | 4.19E-02    | 0.90 (0.81-1.00) | 5.44E-02    | 0.39                  | 0              | 0.87 (0.77-1.00) | 6.70E-03    |
| rs675003          | 118677083 | C/T      | 0.13 | 0.12 | I/I                               | 1.11 (0.86-1.42) | 4.18E-01    | 1.21 (1.05-1.39) | 7.44E-03    | 0.55                  | 0              | 1.18 (1.00-1.40) | 6.96E-03    |
| rs567680          | 118608532 | C/G      | 0.44 | 0.41 | I/I                               | 1.07 (0.91-1.25) | 4.40E-01    | 1.14 (1.03-1.24) | 7.16E-03    | 0.51                  | 0              | 1.11 (1.00-1.25) | 7.23E-03    |
| rs11217004        | 118607622 | G/A      | 0.44 | 0.41 | I/I                               | 1.07 (0.91-1.25) | 4.39E-01    | 1.13 (1.03-1.24) | 7.49E-03    | 0.52                  | 0              | 1.11 (1.00-1.25) | 7.48E-03    |
| rs614554          | 118635151 | T/C      | 0.44 | 0.41 | I/I                               | 1.07 (0.91-1.26) | 4.12E-01    | 1.13 (1.03-1.24) | 8.27E-03    | 0.55                  | 0              | 1.11 (1.00-1.25) | 7.53E-03    |
| rs598207          | 118765267 | G/C      | 0.26 | 0.28 | I/I                               | 0.83 (0.69-1.00) | 5.11E-02    | 0.90 (0.81-1.00) | 5.49E-02    | 0.44                  | 0              | 0.88 (0.78-1.00) | 7.74E-03    |
| rs566416          | 118759610 | T/G      | 0.23 | 0.25 | O/O                               | 0.82 (0.67-0.99) | 4.11E-02    | 0.91 (0.81-1.01) | 6.82E-02    | 0.36                  | 0              | 0.88 (0.77-1.00) | 8.52E-03    |
| rs73005500        | 118697375 | T/C      | 0.17 | 0.16 | I/I                               | 1.04 (0.83-1.30) | 7.13E-01    | 1.20 (1.06-1.35) | 4.05E-03    | 0.29                  | 11             | 1.15 (0.99-1.34) | 8.53E-03    |
| rs607472          | 118680072 | C/G      | 0.44 | 0.41 | I/I                               | 1.05 (0.89-1.24) | 5.76E-01    | 1.14 (1.04-1.25) | 6.73E-03    | 0.40                  | 0              | 1.11 (0.99-1.24) | 9.44E-03    |
| rs1784543         | 118631653 | A/T      | 0.44 | 0.41 | I/I                               | 1.07 (0.91-1.25) | 4.40E-01    | 1.13 (1.03-1.24) | 9.91E-03    | 0.55                  | 0              | 1.11 (0.99-1.24) | 9.47E-03    |
| chr11:118690737:D | 118690737 | G/GTA    | 0.18 | 0.16 | I/I                               | 1.02 (0.82-1.28) | 8.48E-01    | 1.20 (1.06-1.35) | 3.32E-03    | 0.22                  | 35             | 1.15 (0.99-1.33) | 9.55E-03    |
| rs555649          | 118651809 | T/C      | 0.44 | 0.41 | O/O                               | 1.06 (0.90-1.25) | 4.78E-01    | 1.13 (1.03-1.24) | 8.93E-03    | 0.50                  | 0              | 1.11 (0.99-1.24) | 9.60E-03    |
| rs607125          | 118617299 | T/C      | 0.44 | 0.41 | I/I                               | 1.06 (0.90-1.25) | 4.52E-01    | 1.13 (1.03-1.24) | 1.02E-02    | 0.54                  | 0              | 1.11 (0.99-1.24) | 9.98E-03    |
| rs6589690         | 118632893 | G/A      | 0.13 | 0.12 | I/I                               | 1.10 (0.86-1.40) | 4.64E-01    | 1.20 (1.04-1.38) | 1.03E-02    | 0.53                  | 0              | 1.17 (0.99-1.39) | 1.05E-02    |
| chr11:118667386:D | 118667386 | GTGAT/G  | 0.44 | 0.41 | I/I                               | 1.05 (0.89-1.24) | 5.42E-01    | 1.13 (1.03-1.24) | 8.45E-03    | 0.45                  | 0              | 1.11 (0.99-1.24) | 1.06E-02    |
| rs12796102        | 118662028 | C/T      | 0.44 | 0.41 | I/I                               | 1.05 (0.89-1.24) | 5.32E-01    | 1.13 (1.03-1.24) | 8.94E-03    | 0.45                  | 0              | 1.11 (0.99-1.24) | 1.09E-02    |
| rs515707          | 118685481 | C/T      | 0.18 | 0.16 | I/I                               | 1.02 (0.82-1.27) | 8.56E-01    | 1.19 (1.06-1.35) | 4.07E-03    | 0.23                  | 32             | 1.14 (0.98-1.33) | 1.13E-02    |
| chr11:118647949:D | 118647949 | CAT/C    | 0.45 | 0.42 | I/I                               | 1.06 (0.90-1.25) | 4.97E-01    | 1.13 (1.03-1.24) | 1.04E-02    | 0.50                  | 0              | 1.11 (0.99-1.24) | 1.14E-02    |
| rs113641235       | 118700264 | C/T      | 0.17 | 0.16 | I/I                               | 1.03 (0.83-1.29) | 7.61E-01    | 1.19 (1.05-1.34) | 5.19E-03    | 0.28                  | 14             | 1.14 (0.98-1.33) | 1.14E-02    |
| chr11:118647944:D | 118647944 | CCA/C    | 0.45 | 0.42 | I/I                               | 1.05 (0.89-1.24) | 5.32E-01    | 1.13 (1.03-1.24) | 9.89E-03    | 0.47                  | 0              | 1.11 (0.99-1.24) | 1.18E-02    |
| rs10736495        | 118607090 | G/C      | 0.13 | 0.12 | I/I                               | 1.11 (0.87-1.41) | 4.22E-01    | 1.19 (1.04-1.37) | 1.40E-02    | 0.60                  | 0              | 1.17 (0.98-1.39) | 1.21E-02    |
| rs515523          | 118658075 | A/G      | 0.44 | 0.41 | I/I                               | 1.05 (0.89-1.24) | 5.62E-01    | 1.13 (1.03-1.24) | 9.52E-03    | 0.44                  | 0              | 1.11 (0.99-1.24) | 1.23E-02    |
| chr11:118661509:I | 118661509 | C/CG     | 0.44 | 0.41 | I/I                               | 1.04 (0.89-1.23) | 5.98E-01    | 1.13 (1.03-1.24) | 9.05E-03    | 0.41                  | 0              | 1.11 (0.99-1.24) | 1.28E-02    |
| rs676925          | 118765688 | C/G      | 0.24 | 0.26 | I/I                               | 0.87 (0.72-1.05) | 1.34E-01    | 0.90 (0.81-1.00) | 4.58E-02    | 0.75                  | 0              | 0.89 (0.78-1.01) | 1.28E-02    |
| rs580079          | 118625609 | T/C      | 0.14 | 0.13 | I/I                               | 1.06 (0.83-1.36) | 6.30E-01    | 1.19 (1.05-1.36) | 8.57E-03    | 0.41                  | 0              | 1.15 (0.98-1.36) | 1.31E-02    |
| rs1784300         | 118679629 | A/T      | 0.44 | 0.41 | I/I                               | 1.04 (0.88-1.23) | 6.32E-01    | 1.13 (1.03-1.24) | 8.83E-03    | 0.39                  | 0              | 1.11 (0.99-1.24) | 1.33E-02    |
| chr11:118688574:D | 118688574 | CTTG/C   | 0.44 | 0.41 | I/I                               | 1.04 (0.88-1.23) | 6.35E-01    | 1.13 (1.03-1.24) | 9.51E-03    | 0.40                  | 0              | 1.10 (0.99-1.24) | 1.41E-02    |
| chr11:118766356:I | 118766356 | C/CA     | 0.23 | 0.25 | I/I                               | 0.88 (0.73-1.07) | 1.97E-01    | 0.89 (0.80-0.99) | 3.90E-02    | 0.92                  | 0              | 0.89 (0.78-1.01) | 1.49E-02    |
| rs2105782         | 118659896 | T/C      | 0.44 | 0.41 | I/I                               | 1.06 (0.90-1.25) | 5.00E-01    | 1.12 (1.02-1.23) | 1.57E-02    | 0.54                  | 0              | 1.10 (0.98-1.23) | 1.63E-02    |
| rs638514          | 118575693 | T/C      | 0.43 | 0.40 | I/I                               | 1.06 (0.90-1.25) | 4.89E-01    | 1.12 (1.02-1.23) | 1.83E-02    | 0.59                  | 0              | 1.10 (0.98-1.24) | 1.79E-02    |
| rs1790188         | 118661055 | C/T      | 0.13 | 0.12 | I/I                               | 1.05 (0.82-1.34) | 7.05E-01    | 1.19 (1.04-1.36) | 1.24E-02    | 0.38                  | 0              | 1.15 (0.97-1.36) | 2.05E-02    |
| rs1784295         | 118660932 | G/A      | 0.13 | 0.12 | I/I                               | 1.04 (0.82-1.34) | 7.32E-01    | 1.19 (1.04-1.37) | 1.20E-02    | 0.36                  | 0              | 1.15 (0.97-1.36) | 2.09E-02    |
| rs7104819         | 118769442 | A/G      | 0.40 | 0.42 | I/I                               | 0.85 (0.72-1.01) | 6.49E-02    | 0.93 (0.85-1.02) | 1.25E-01    | 0.38                  | 0              | 0.91 (0.81-1.02) | 2.26E-02    |
| rs6421569         | 118655775 | C/A      | 0.13 | 0.12 | I/I                               | 1.06 (0.83-1.35) | 6.45E-01    | 1.18 (1.03-1.36) | 1.75E-02    | 0.44                  | 0              | 1.15 (0.97-1.36) | 2.40E-02    |
| rs2508564         | 118699744 | T/C      | 0.18 | 0.16 | I/I                               | 1.02 (0.82-1.27) | 8.51E-01    | 1.17 (1.04-1.32) | 1.15E-02    | 0.29                  | 10             | 1.13 (0.97-1.31) | 2.49E-02    |
| rs485901          | 118622245 | A/G      | 0.13 | 0.12 | I/I                               | 1.05 (0.83-1.35) | 6.68E-01    | 1.18 (1.03-1.35) | 1.74E-02    | 0.43                  | 0              | 1.14 (0.97-1.35) | 2.49E-02    |
| rs73001406        | 118560857 | G/A      | 0.21 | 0.23 | I/I                               | 0.96 (0.79-1.17) | 6.86E-01    | 0.87 (0.78-0.98) | 1.89E-02    | 0.40                  | 0              | 0.90 (0.78-1.03) | 2.76E-02    |
| rs77731159        | 118691975 | T/A      | 0.04 | 0.04 | I/I                               | 1.16 (0.76-1.77) | 4.90E-01    | 1.29 (1.02-1.62) | 3.37E-02    | 0.67                  | 0              | 1.25 (0.94-1.66) | 3.03E-02    |
| rs494459          | 118574675 | C/T      | 0.43 | 0.40 | O/O                               | 1.05 (0.89-1.23) | 5.83E-01    | 1.11 (1.01-1.22) | 2.81E-02    | 0.55                  | 0              | 1.09 (0.98-1.22) | 3.14E-02    |
| rs496058          | 118580906 | A/G      | 0.43 | 0.40 | I/I                               | 1.05 (0.89-1.23) | 5.88E-01    | 1.11 (1.01-1.22) | 2.89E-02    | 0.55                  | 0              | 1.09 (0.97-1.22) | 3.25E-02    |
| rs640373          | 118698160 | A/G      | 0.18 | 0.16 | I/I                               | 1.02 (0.82-1.27) | 8.48E-01    | 1.16 (1.03-1.31) | 1.65E-02    | 0.32                  | 0              | 1.12 (0.96-1.30) | 3.27E-02    |
| rs576283          | 118573894 | A/G      | 0.43 | 0.40 | I/I                               | 1.04 (0.88-1.22) | 6.62E-01    | 1.11 (1.01-1.22) | 2.54E-02    | 0.47                  | 0              | 1.09 (0.97-1.22) | 3.35        |

**Supplementary Table 11.** Association analysis in CXCR5

| SNP               | BP        | Alleles  |      | MAF     |             | Observed or Imputed in Dataset1/2 | Dataset 1 |                  | Dataset 2 |                | Test of heterogeneity |                  | Meta analysis |  |
|-------------------|-----------|----------|------|---------|-------------|-----------------------------------|-----------|------------------|-----------|----------------|-----------------------|------------------|---------------|--|
|                   |           | maj/ min | Case | Control | OR (95% CI) |                                   | P         | OR (95% CI)      | P         | P <sub>Q</sub> | I <sup>2</sup>        | OR (95% CI)      | P             |  |
|                   |           |          |      |         |             |                                   |           |                  |           |                |                       |                  |               |  |
| chr11:118553112:D | 118553112 | TAG/T    | 0.21 | 0.23    | I/I         | 0.98 (0.80-1.19)                  | 8.22E-01  | 0.87 (0.78-0.98) | 1.80E-02  | 0.32           | 0                     | 0.90 (0.79-1.03) | 3.38E-02      |  |
| rs75488969        | 118712509 | C/T      | 0.09 | 0.09    | I/I         | 1.08 (0.82-1.44)                  | 5.74E-01  | 1.19 (1.02-1.40) | 3.14E-02  | 0.57           | 0                     | 1.16 (0.96-1.41) | 3.39E-02      |  |
| rs637563          | 118575479 | A/G      | 0.43 | 0.40    | I/I         | 1.04 (0.88-1.22)                  | 6.52E-01  | 1.11 (1.01-1.22) | 2.66E-02  | 0.48           | 0                     | 1.09 (0.97-1.22) | 3.42E-02      |  |
| rs521910          | 118610629 | G/A      | 0.13 | 0.12    | O/O         | 1.05 (0.83-1.34)                  | 6.73E-01  | 1.17 (1.02-1.34) | 2.55E-02  | 0.47           | 0                     | 1.13 (0.96-1.34) | 3.44E-02      |  |
| rs10892281        | 118614397 | C/T      | 0.13 | 0.13    | I/I         | 1.09 (0.86-1.40)                  | 4.64E-01  | 1.15 (1.00-1.32) | 4.24E-02  | 0.72           | 0                     | 1.14 (0.96-1.34) | 3.50E-02      |  |
| rs530901          | 118575011 | T/C      | 0.43 | 0.40    | I/I         | 1.04 (0.88-1.22)                  | 6.51E-01  | 1.11 (1.01-1.22) | 2.79E-02  | 0.49           | 0                     | 1.09 (0.97-1.22) | 3.54E-02      |  |
| rs526850          | 118605127 | T/G      | 0.13 | 0.12    | I/I         | 1.07 (0.84-1.37)                  | 5.79E-01  | 1.16 (1.01-1.33) | 3.30E-02  | 0.57           | 0                     | 1.14 (0.96-1.34) | 3.56E-02      |  |
| rs1783937         | 118609736 | G/A      | 0.13 | 0.12    | I/I         | 1.06 (0.83-1.35)                  | 6.36E-01  | 1.16 (1.01-1.34) | 2.96E-02  | 0.52           | 0                     | 1.13 (0.96-1.34) | 3.63E-02      |  |
| rs2186781         | 118605447 | C/T      | 0.13 | 0.12    | I/I         | 1.07 (0.84-1.37)                  | 5.92E-01  | 1.16 (1.01-1.33) | 3.40E-02  | 0.56           | 0                     | 1.13 (0.96-1.34) | 3.74E-02      |  |
| rs475946          | 118629143 | C/T      | 0.13 | 0.12    | I/I         | 1.05 (0.82-1.34)                  | 6.94E-01  | 1.17 (1.02-1.34) | 2.74E-02  | 0.46           | 0                     | 1.13 (0.96-1.34) | 3.77E-02      |  |
| rs2508929         | 118641451 | T/G      | 0.13 | 0.12    | I/I         | 1.06 (0.83-1.35)                  | 6.59E-01  | 1.16 (1.01-1.34) | 3.04E-02  | 0.50           | 0                     | 1.13 (0.96-1.34) | 3.86E-02      |  |
| rs4938549         | 118701597 | C/T      | 0.17 | 0.16    | I/I         | 1.01 (0.81-1.27)                  | 8.97E-01  | 1.16 (1.02-1.31) | 1.84E-02  | 0.31           | 5                     | 1.12 (0.96-1.30) | 3.87E-02      |  |
| rs4938550         | 118707171 | A/G      | 0.17 | 0.16    | I/I         | 1.01 (0.81-1.26)                  | 9.43E-01  | 1.17 (1.03-1.32) | 1.70E-02  | 0.27           | 18                    | 1.12 (0.96-1.30) | 3.98E-02      |  |
| rs1961138         | 118619423 | T/C      | 0.13 | 0.12    | I/I         | 1.06 (0.83-1.35)                  | 6.55E-01  | 1.16 (1.01-1.34) | 3.18E-02  | 0.50           | 0                     | 1.13 (0.96-1.34) | 3.99E-02      |  |
| rs493720          | 118604678 | C/T      | 0.13 | 0.12    | I/I         | 1.10 (0.86-1.40)                  | 4.62E-01  | 1.15 (1.00-1.32) | 5.00E-02  | 0.74           | 0                     | 1.13 (0.96-1.34) | 4.03E-02      |  |
| rs10892252        | 118555692 | A/G      | 0.21 | 0.23    | I/I         | 0.97 (0.80-1.17)                  | 7.21E-01  | 0.88 (0.79-0.99) | 2.81E-02  | 0.43           | 0                     | 0.91 (0.79-1.04) | 4.04E-02      |  |
| rs2510901         | 118699863 | G/A      | 0.18 | 0.17    | I/I         | 1.01 (0.81-1.27)                  | 8.99E-01  | 1.15 (1.02-1.30) | 1.95E-02  | 0.32           | 1                     | 1.11 (0.96-1.29) | 4.05E-02      |  |
| rs6589687         | 118615660 | A/T      | 0.13 | 0.12    | I/I         | 1.07 (0.84-1.36)                  | 5.94E-01  | 1.16 (1.01-1.33) | 3.72E-02  | 0.58           | 0                     | 1.13 (0.96-1.34) | 4.05E-02      |  |
| rs529717          | 118640081 | G/A      | 0.13 | 0.12    | I/I         | 1.05 (0.82-1.34)                  | 6.91E-01  | 1.16 (1.01-1.34) | 3.01E-02  | 0.48           | 0                     | 1.13 (0.96-1.34) | 4.06E-02      |  |
| rs6421568         | 118655704 | G/C      | 0.13 | 0.12    | I/I         | 1.06 (0.83-1.35)                  | 6.61E-01  | 1.16 (1.01-1.33) | 3.27E-02  | 0.51           | 0                     | 1.13 (0.96-1.34) | 4.12E-02      |  |
| rs2508915         | 118652781 | G/C      | 0.14 | 0.13    | I/I         | 1.03 (0.80-1.31)                  | 8.36E-01  | 1.17 (1.02-1.34) | 2.29E-02  | 0.35           | 0                     | 1.13 (0.95-1.34) | 4.16E-02      |  |
| rs638893          | 118698537 | A/G      | 0.17 | 0.16    | I/I         | 1.02 (0.82-1.27)                  | 8.48E-01  | 1.15 (1.02-1.30) | 2.31E-02  | 0.35           | 0                     | 1.11 (0.96-1.29) | 4.26E-02      |  |
| rs77841686        | 118762073 | G/A      | 0.02 | 0.02    | I/I         | 0.88 (0.51-1.51)                  | 6.36E-01  | 0.69 (0.48-0.98) | 3.73E-02  | 0.46           | 0                     | 0.74 (0.49-1.11) | 4.39E-02      |  |
| rs640120          | 118618837 | C/A      | 0.13 | 0.12    | I/I         | 1.06 (0.83-1.36)                  | 6.30E-01  | 1.16 (1.01-1.33) | 3.78E-02  | 0.55           | 0                     | 1.13 (0.95-1.33) | 4.39E-02      |  |
| rs534114          | 118702002 | G/A      | 0.17 | 0.16    | I/I         | 1.01 (0.81-1.26)                  | 9.06E-01  | 1.16 (1.02-1.31) | 2.15E-02  | 0.31           | 1                     | 1.11 (0.96-1.29) | 4.45E-02      |  |
| rs1790187         | 118644213 | G/A      | 0.13 | 0.12    | I/I         | 1.05 (0.83-1.35)                  | 6.73E-01  | 1.16 (1.01-1.33) | 3.67E-02  | 0.51           | 0                     | 1.13 (0.95-1.33) | 4.64E-02      |  |
| rs78041268        | 118763313 | G/A      | 0.02 | 0.02    | I/I         | 0.88 (0.51-1.51)                  | 6.34E-01  | 0.69 (0.49-0.99) | 4.24E-02  | 0.47           | 0                     | 0.74 (0.49-1.11) | 4.87E-02      |  |
| rs530646          | 118701668 | G/A      | 0.17 | 0.16    | I/I         | 1.01 (0.81-1.27)                  | 8.97E-01  | 1.15 (1.02-1.30) | 2.57E-02  | 0.33           | 0                     | 1.11 (0.95-1.29) | 4.99E-02      |  |
| chr11:118560953:i | 118560953 | G/GC     | 0.21 | 0.23    | I/I         | 0.96 (0.79-1.17)                  | 7.03E-01  | 0.89 (0.80-0.99) | 4.02E-02  | 0.49           | 0                     | 0.91 (0.80-1.04) | 5.24E-02      |  |
| rs480791          | 118704255 | A/G      | 0.17 | 0.16    | I/I         | 1.02 (0.82-1.27)                  | 8.75E-01  | 1.15 (1.01-1.30) | 2.91E-02  | 0.36           | 0                     | 1.11 (0.95-1.29) | 5.31E-02      |  |
| rs2508571         | 118603983 | C/T      | 0.43 | 0.40    | I/I         | 1.04 (0.89-1.23)                  | 6.00E-01  | 1.10 (1.00-1.20) | 5.12E-02  | 0.62           | 0                     | 1.08 (0.97-1.21) | 5.34E-02      |  |
| rs12808822        | 118702269 | T/C      | 0.17 | 0.16    | I/I         | 1.01 (0.81-1.27)                  | 8.97E-01  | 1.15 (1.01-1.30) | 2.81E-02  | 0.34           | 0                     | 1.11 (0.95-1.29) | 5.35E-02      |  |
| rs496547          | 118576463 | T/A      | 0.33 | 0.36    | I/I         | 0.93 (0.78-1.10)                  | 3.96E-01  | 0.92 (0.83-1.01) | 8.60E-02  | 0.92           | 0                     | 0.92 (0.82-1.04) | 5.66E-02      |  |
| chr11:118604704:i | 118604704 | GAAAC/G  | 0.13 | 0.12    | I/I         | 1.09 (0.86-1.40)                  | 4.68E-01  | 1.14 (0.99-1.31) | 7.40E-02  | 0.80           | 0                     | 1.12 (0.95-1.33) | 5.76E-02      |  |
| rs1170396         | 118703817 | A/T      | 0.17 | 0.16    | I/I         | 1.01 (0.81-1.27)                  | 8.97E-01  | 1.14 (1.01-1.29) | 3.16E-02  | 0.36           | 0                     | 1.11 (0.95-1.29) | 5.86E-02      |  |
| rs2508921         | 118703484 | C/T      | 0.17 | 0.16    | I/I         | 1.01 (0.81-1.27)                  | 8.97E-01  | 1.14 (1.01-1.29) | 3.16E-02  | 0.36           | 0                     | 1.11 (0.95-1.29) | 5.86E-02      |  |
| rs2277297         | 118550524 | C/T      | 0.21 | 0.23    | I/I         | 0.97 (0.80-1.18)                  | 7.63E-01  | 0.89 (0.80-1.00) | 4.16E-02  | 0.45           | 0                     | 0.91 (0.80-1.04) | 5.92E-02      |  |
| rs76478216        | 118605352 | T/C      | 0.02 | 0.03    | I/I         | 0.63 (0.36-1.10)                  | 1.07E-01  | 0.83 (0.62-1.12) | 2.26E-01  | 0.40           | 0                     | 0.77 (0.53-1.12) | 6.01E-02      |  |
| chr11:118550524:i | 118550524 | C/CT     | 0.21 | 0.23    | I/I         | 0.97 (0.80-1.18)                  | 7.97E-01  | 0.89 (0.79-1.00) | 4.18E-02  | 0.42           | 0                     | 0.91 (0.80-1.05) | 6.28E-02      |  |
| rs535996          | 118637666 | C/T      | 0.13 | 0.13    | I/I         | 1.02 (0.80-1.31)                  | 8.69E-01  | 1.16 (1.01-1.33) | 3.93E-02  | 0.39           | 0                     | 1.12 (0.94-1.32) | 6.67E-02      |  |
| rs75438046        | 118767564 | G/A      | 0.02 | 0.02    | I/I         | 0.88 (0.51-1.51)                  | 6.38E-01  | 0.71 (0.50-1.02) | 6.21E-02  | 0.53           | 0                     | 0.76 (0.50-1.14) | 6.74E-02      |  |
| rs529848          | 118591292 | A/G      | 0.13 | 0.12    | I/I         | 1.03 (0.81-1.33)                  | 7.92E-01  | 1.15 (1.00-1.33) | 4.67E-02  | 0.45           | 0                     | 1.12 (0.94-1.33) | 6.81E-02      |  |
| rs113786535       | 118726340 | C/T      | 0.17 | 0.16    | I/I         | 1.00 (0.80-1.25)                  | 9.72E-01  | 1.15 (1.01-1.30) | 2.96E-02  | 0.28           | 14                    | 1.10 (0.95-1.28) | 6.82E-02      |  |
| rs5023233         | 118568795 | A/G      | 0.32 | 0.30    | I/I         | 1.06 (0.89-1.27)                  | 5.13E-01  | 1.09 (0.99-1.21) | 8.66E-02  | 0.79           | 0                     | 1.08 (0.96-1.22) | 7.18E-02      |  |
| rs7479114         | 118568813 | C/T      | 0.32 | 0.30    | I/I         | 1.05 (0.88-1.26)                  | 5.62E-01  | 1.09 (0.99-1.21) | 8.20E-02  | 0.73           | 0                     | 1.08 (0.96-1.22) | 7.47E-02      |  |
| rs636736          | 118705145 | A/G      | 0.17 | 0.17    | O/O         | 1.00 (0.81-1.25)                  | 9.85E-01  | 1.14 (1.01-1.28) | 3.97E-02  | 0.33           | 0                     | 1.10 (0.94-1.27) | 7.96E-02      |  |
| rs511451          | 118568639 | C/T      | 0.32 | 0.30    | I/I         | 1.06 (0.89-1.26)                  | 4.95E-01  | 1.09 (0.98-1.20) | 1.02E-01  | 0.82           | 0                     | 1.08 (0.96-1.22) | 8.02E-02      |  |
| rs2277296         | 118550522 | T/C      | 0.21 | 0.23    | I/I         | 0.97 (0.80-1.18)                  | 7.63E-01  | 0.90 (0.81-1.01) | 6.32E-02  | 0.51           | 0                     | 0.92 (0.80-1.05) | 8.27E-02      |  |
| rs649338          | 118705654 | G/A      | 0.17 | 0.16    | I/I         | 1.01 (0.81-1.26)                  | 9.11E-01  | 1.13 (1.00-1.28) | 4.80E-02  | 0.39           | 0                     | 1.10 (0.94-1.28) | 8.28E-02      |  |
| rs566677          | 118598374 | A/G      | 0.12 | 0.12    | I/I         | 1.06 (0.83-1.37)                  | 6.22E-01  | 1.13 (0.98-1.30) | 9.46E-02  | 0.70           | 0                     | 1.11 (0.93-1.32) | 9.32E-02      |  |
| rs7928228         | 118703001 | C/T      | 0.18 | 0.17    | I/I         | 1.00 (0.80-1.25)                  | 9.88E-01  | 1.13 (1.00-1.28) | 4.70E-02  | 0.34           | 0                     | 1.09 (0.94-1.27) | 9.33E-02      |  |
| rs498912          | 118576997 | T/C      | 0.12 | 0.11    | I/I         | 1.08 (0.84-1.40)                  | 5.38E-01  | 1.12 (0.97-1.29) | 1.16E-01  | 0.81           | 0                     | 1.11 (0.93-1.32) | 9.68E-02      |  |
| chr11:118570183:i | 118570183 | A/ATTTG  | 0.32 | 0.30    | I/I         | 1.04 (0.88-1.25)                  | 6.26E-01  | 1.09 (0.98-1.20) | 1.01E-01  | 0.70           | 0                     | 1.07 (0.95-1.21) | 9.95E-02      |  |
| rs79108568        | 118775524 | T/G      | 0.02 | 0.02    | I/I         | 1.07 (0.60-1.89)                  | 8.20E-01  | 1.34 (0.97-1.84) | 7.49E-02  | 0.50           | 0                     | 1.26 (0.85-1.86) | 1.03E-01      |  |
| rs553188          | 118576762 | C/T      | 0.12 | 0.11    | O/O         | 1.07 (0.83-1.39)                  | 5.83E-01  | 1.12 (0.97-1.29) | 1.16E-01  | 0.77           | 0                     | 1.11 (0.93-1.32) | 1.04E-01      |  |
| rs557990          | 118601363 | C/T      | 0.13 | 0.12    | I/I         | 1.06 (0.83-1.36)                  | 6.24E-01  | 1.12 (0.98-1.29) | 1.09E-01  | 0.72           | 0                     | 1.10 (0.93-1.31) | 1.05E-01      |  |
| rs554456          | 118570062 | T/C      | 0.33 | 0.31    | I/I         | 1.03 (0.87-1.22)                  | 7.40E-01  | 1.09 (0.99-1.20) | 9.07E-02  | 0.59           | 0                     | 1.07 (0.95-1.21) | 1.07E-01      |  |
| rs523604          | 118755738 | A/G      | 0.44 | 0.46    | O/O         | 0.99 (0.84-1.17)                  | 9.25E-01  | 0.92 (0.84-1.01) | 6.66E-02  | 0.42           | 0                     | 0.94 (0.84-1.05) | 1.09E-01      |  |
| rs2187490         | 118713180 | T/G      | 0.09 | 0.08    | O/O         | 1.11 (0.83-1.48)                  | 4.73E-01  | 1.12 (0.95-1.32) | 1.65E-01  | 0.94           | 0                     | 1.12 (0.92-1.36) | 1.19E-01      |  |
| rs544096          | 118594326 | A/G      | 0.12 | 0.12    | I/I         | 1.04 (0.81-1.33)                  | 7.62E-01  | 1.12 (0.98-1.30) | 1.02E-01  | 0.59           | 0                     | 1.10 (0.93-1.31) | 1.22E-01      |  |
| rs11216949        | 118568668 | C/T      | 0.33 | 0.31    | I/I         | 1.04 (0.87-1.23)                  | 6.88E-01  | 1.08 (0.98-1.19) | 1.18E-01  | 0.67           | 0                     | 1.07 (0.95-1.20) | 1.24E-01      |  |
| rs4393358         | 118569097 | C/T      | 0.33 | 0.31    | I/I         | 1.03 (0.87-1.22)                  | 7.36E-01  | 1.08 (0.98-1.19) | 1.09E-01  | 0.62           | 0                     | 1.07 (0.95-1.20) | 1.24E-01      |  |
| rs149114341       | 118783424 | G/A      | 0.02 | 0.02    | I/I         | 0.93 (0.53-1.63)                  | 8.04E-01  | 0.74 (0.52-1.06) | 9.96E-02  | 0.50           | 0                     | 0.79 (0.52-1.20) | 1.27E-01      |  |
| rs7123811         | 118569469 | T/G      | 0.33 | 0.31    | I/I         | 1.03 (0.87-1.22)                  | 7.36E-01  | 1.08 (0.98-1.19) | 1.12E-01  | 0.62           | 0                     | 1.07 (0.95-1.20) | 1.27E-01      |  |
| rs7119222         | 118787213 | T/C      | 0.01 | 0.01    | I/I         | 0.27 (0.08-0.87)                  | 2.82E-02  | 0.91 (0.58-1.42) | 6.76E-01  | 0.06           | 72                    | 0.64 (0.33-1.23) | 1.27E-01      |  |
| rs482889          | 118570098 | G/T      | 0.33 | 0.31    | I/I         | 1.03 (0.87-1.22)                  | 7.19E-01  | 1.08 (0.98-1.19) | 1.19E-01  | 0.64           | 0                     | 1.07 (0.95-1.20) | 1.30E-01      |  |
| rs7479089         | 118568809 | A/G      | 0.31 | 0.29    | I/I         | 1.03 (0.86-1.23)                  | 7.66E-01  | 1.08 (0.98-1.20) | 1.13E-01  | 0.61           | 0                     | 1.07 (0.95-1.21) | 1.33E-01      |  |
| rs11602400        | 118787897 | A/C      | 0.01 | 0.01    | I/I         | 0.27 (0.08-0.89)                  | 3.17E-02  | 0.91 (0.58-1.42) | 6.76E-01  | 0.06           | 71                    | 0.64 (0.33-1.24) | 1.33E-01      |  |
| rs517445          | 118573535 | A/G      | 0.33 | 0.31    | I/I         | 1.03 (0.87-1.22)                  | 7.16E-01  | 1.08 (0.98-1.19) | 1.24E-01  | 0.66           | 0                     | 1.07 (0.95-1.20) | 1.35E-01      |  |
| rs518354          | 118595718 | T/C      | 0.1  |         |             |                                   |           |                  |           |                |                       |                  |               |  |

Supplementary Table 11. Association analysis in CXCR5

| SNP               | BP        | Alleles   |      | MAF     |             | Observed or Imputed in Dataset1/2 | Dataset 1 |                  | Dataset 2 |       | Test of heterogeneity |                  | Meta analysis |  |
|-------------------|-----------|-----------|------|---------|-------------|-----------------------------------|-----------|------------------|-----------|-------|-----------------------|------------------|---------------|--|
|                   |           | maj / min | Case | Control | OR (95% CI) |                                   | P         | OR (95% CI)      | P         | $P_Q$ | $I^2$                 | OR (95% CI)      | P             |  |
|                   |           |           |      |         |             |                                   |           |                  |           |       |                       |                  |               |  |
| rs61730467        | 118772160 | G/A       | 0.02 | 0.02    | I/I         | 1.03 (0.59-1.80)                  | 9.07E-01  | 1.30 (0.96-1.77) | 9.30E-02  | 0.47  | 0                     | 1.22 (0.84-1.78) | 1.38E-01      |  |
| rs558781          | 118564397 | G/T       | 0.33 | 0.31    | I/I         | 1.07 (0.90-1.28)                  | 4.14E-01  | 1.06 (0.96-1.17) | 2.19E-01  | 0.91  | 0                     | 1.07 (0.95-1.20) | 1.40E-01      |  |
| rs143605660       | 118707035 | G/A       | 0.05 | 0.04    | I/I         | 1.24 (0.83-1.86)                  | 2.89E-01  | 1.13 (0.90-1.41) | 2.87E-01  | 0.68  | 0                     | 1.16 (0.88-1.52) | 1.43E-01      |  |
| rs519294          | 118573743 | C/A       | 0.32 | 0.31    | I/I         | 1.05 (0.88-1.24)                  | 6.04E-01  | 1.07 (0.97-1.18) | 1.63E-01  | 0.81  | 0                     | 1.07 (0.95-1.20) | 1.45E-01      |  |
| rs657769          | 118571316 | C/T       | 0.33 | 0.31    | I/I         | 1.03 (0.87-1.22)                  | 7.36E-01  | 1.08 (0.98-1.19) | 1.31E-01  | 0.65  | 0                     | 1.06 (0.95-1.20) | 1.45E-01      |  |
| rs4486664         | 118569067 | A/C       | 0.33 | 0.31    | O/I         | 1.02 (0.86-1.21)                  | 7.93E-01  | 1.08 (0.98-1.19) | 1.21E-01  | 0.59  | 0                     | 1.06 (0.95-1.20) | 1.46E-01      |  |
| rs508640          | 118564413 | A/G       | 0.33 | 0.31    | I/I         | 1.07 (0.90-1.28)                  | 4.26E-01  | 1.06 (0.96-1.17) | 2.27E-01  | 0.92  | 0                     | 1.07 (0.95-1.20) | 1.48E-01      |  |
| rs7107743         | 118569523 | C/G       | 0.33 | 0.31    | I/I         | 1.03 (0.87-1.22)                  | 7.36E-01  | 1.08 (0.98-1.19) | 1.35E-01  | 0.66  | 0                     | 1.06 (0.95-1.20) | 1.48E-01      |  |
| rs541631          | 118571023 | A/G       | 0.33 | 0.31    | I/I         | 1.03 (0.87-1.22)                  | 7.36E-01  | 1.08 (0.98-1.19) | 1.36E-01  | 0.66  | 0                     | 1.06 (0.95-1.20) | 1.49E-01      |  |
| rs544452          | 118571357 | G/T       | 0.33 | 0.31    | I/I         | 1.04 (0.88-1.24)                  | 6.55E-01  | 1.07 (0.97-1.18) | 1.55E-01  | 0.76  | 0                     | 1.06 (0.95-1.20) | 1.49E-01      |  |
| rs7108144         | 118569694 | G/A       | 0.33 | 0.31    | I/I         | 1.03 (0.87-1.22)                  | 7.37E-01  | 1.08 (0.98-1.19) | 1.38E-01  | 0.66  | 0                     | 1.06 (0.94-1.20) | 1.51E-01      |  |
| rs642224          | 118570919 | G/A       | 0.33 | 0.31    | I/I         | 1.03 (0.87-1.22)                  | 7.36E-01  | 1.08 (0.98-1.19) | 1.38E-01  | 0.66  | 0                     | 1.06 (0.94-1.20) | 1.51E-01      |  |
| rs659564          | 118570914 | C/A       | 0.33 | 0.31    | I/I         | 1.03 (0.87-1.22)                  | 7.36E-01  | 1.08 (0.98-1.19) | 1.38E-01  | 0.66  | 0                     | 1.06 (0.94-1.20) | 1.51E-01      |  |
| rs657539          | 118572021 | C/T       | 0.33 | 0.31    | I/I         | 1.04 (0.87-1.23)                  | 6.80E-01  | 1.07 (0.97-1.18) | 1.52E-01  | 0.73  | 0                     | 1.06 (0.94-1.20) | 1.52E-01      |  |
| rs12793594        | 118569900 | T/C       | 0.33 | 0.31    | I/I         | 1.03 (0.87-1.22)                  | 7.37E-01  | 1.08 (0.98-1.19) | 1.39E-01  | 0.66  | 0                     | 1.06 (0.94-1.20) | 1.52E-01      |  |
| rs658040          | 118572171 | A/G       | 0.33 | 0.31    | I/I         | 1.04 (0.88-1.23)                  | 6.59E-01  | 1.07 (0.97-1.18) | 1.59E-01  | 0.76  | 0                     | 1.06 (0.94-1.20) | 1.54E-01      |  |
| rs6589707         | 118781710 | C/A       | 0.01 | 0.01    | I/I         | 0.30 (0.09-0.97)                  | 4.45E-02  | 0.91 (0.59-1.41) | 6.81E-01  | 0.08  | 67                    | 0.66 (0.35-1.27) | 1.57E-01      |  |
| rs611733          | 118572760 | C/T       | 0.33 | 0.31    | I/I         | 1.03 (0.87-1.23)                  | 6.90E-01  | 1.07 (0.97-1.18) | 1.56E-01  | 0.72  | 0                     | 1.06 (0.94-1.20) | 1.57E-01      |  |
| rs11217081        | 118769032 | A/G       | 0.43 | 0.44    | I/I         | 0.87 (0.74-1.03)                  | 1.05E-01  | 0.97 (0.88-1.06) | 5.18E-01  | 0.28  | 16                    | 0.94 (0.84-1.05) | 1.57E-01      |  |
| rs523793          | 118570697 | C/T       | 0.33 | 0.31    | I/I         | 1.03 (0.87-1.22)                  | 7.37E-01  | 1.07 (0.98-1.19) | 1.45E-01  | 0.67  | 0                     | 1.06 (0.94-1.20) | 1.58E-01      |  |
| rs11216947        | 118567218 | G/A       | 0.33 | 0.32    | I/I         | 1.05 (0.88-1.25)                  | 5.77E-01  | 1.07 (0.97-1.18) | 1.91E-01  | 0.87  | 0                     | 1.06 (0.94-1.20) | 1.60E-01      |  |
| rs658676          | 118571123 | C/T       | 0.33 | 0.31    | I/I         | 1.03 (0.87-1.22)                  | 7.36E-01  | 1.07 (0.97-1.18) | 1.51E-01  | 0.68  | 0                     | 1.06 (0.94-1.19) | 1.63E-01      |  |
| rs611217          | 118572611 | C/T       | 0.33 | 0.31    | I/I         | 1.03 (0.87-1.22)                  | 7.15E-01  | 1.07 (0.97-1.18) | 1.59E-01  | 0.70  | 0                     | 1.06 (0.94-1.19) | 1.65E-01      |  |
| rs11217083        | 118770321 | A/G       | 0.42 | 0.43    | I/I         | 0.88 (0.75-1.04)                  | 1.39E-01  | 0.97 (0.88-1.06) | 4.89E-01  | 0.34  | 0                     | 0.94 (0.84-1.06) | 1.70E-01      |  |
| chr11:118789500:D | 118789500 | TGA/T     | 0.01 | 0.01    | I/I         | 0.28 (0.09-0.92)                  | 3.66E-02  | 0.93 (0.59-1.49) | 7.73E-01  | 0.07  | 70                    | 0.66 (0.34-1.30) | 1.74E-01      |  |
| rs656287          | 118571790 | A/G       | 0.33 | 0.31    | I/I         | 1.03 (0.87-1.22)                  | 7.36E-01  | 1.07 (0.97-1.18) | 1.69E-01  | 0.70  | 0                     | 1.06 (0.94-1.19) | 1.79E-01      |  |
| rs489126          | 118572747 | G/A       | 0.33 | 0.31    | I/I         | 1.03 (0.87-1.22)                  | 7.22E-01  | 1.07 (0.97-1.18) | 1.78E-01  | 0.72  | 0                     | 1.06 (0.94-1.19) | 1.83E-01      |  |
| chr11:118704310:I | 118704310 | TAG/T     | 0.17 | 0.16    | I/I         | 1.01 (0.81-1.27)                  | 9.03E-01  | 1.10 (0.97-1.25) | 1.37E-01  | 0.54  | 0                     | 1.08 (0.92-1.25) | 1.85E-01      |  |
| rs74337439        | 118626825 | G/A       | 0.02 | 0.03    | I/I         | 0.66 (0.38-1.16)                  | 1.53E-01  | 0.91 (0.67-1.23) | 5.20E-01  | 0.34  | 0                     | 0.83 (0.57-1.21) | 1.92E-01      |  |
| rs78502545        | 118615390 | C/T       | 0.02 | 0.03    | I/I         | 0.66 (0.38-1.16)                  | 1.53E-01  | 0.91 (0.67-1.23) | 5.43E-01  | 0.33  | 0                     | 0.83 (0.57-1.21) | 2.03E-01      |  |
| rs6589674         | 118566039 | A/G       | 0.33 | 0.32    | I/I         | 1.04 (0.88-1.24)                  | 6.30E-01  | 1.06 (0.96-1.17) | 2.31E-01  | 0.87  | 0                     | 1.06 (0.94-1.19) | 2.03E-01      |  |
| rs4938568         | 118721928 | G/A       | 0.25 | 0.24    | I/I         | 1.01 (0.83-1.22)                  | 9.15E-01  | 1.08 (0.97-1.21) | 1.52E-01  | 0.54  | 0                     | 1.06 (0.93-1.21) | 2.05E-01      |  |
| rs76457018        | 118762701 | G/A       | 0.13 | 0.12    | I/I         | 1.16 (0.91-1.47)                  | 2.34E-01  | 1.05 (0.92-1.21) | 4.58E-01  | 0.52  | 0                     | 1.08 (0.91-1.28) | 2.07E-01      |  |
| rs7130076         | 118566090 | T/C       | 0.33 | 0.32    | I/I         | 1.04 (0.88-1.24)                  | 6.28E-01  | 1.06 (0.96-1.17) | 2.52E-01  | 0.89  | 0                     | 1.05 (0.94-1.19) | 2.19E-01      |  |
| chr11:118761879:I | 118761879 | T/TA      | 0.12 | 0.12    | I/I         | 1.15 (0.90-1.46)                  | 2.58E-01  | 1.05 (0.92-1.21) | 4.67E-01  | 0.54  | 0                     | 1.08 (0.91-1.28) | 2.23E-01      |  |
| rs11217059        | 118723087 | C/T       | 0.24 | 0.24    | I/I         | 0.99 (0.82-1.20)                  | 9.52E-01  | 1.08 (0.97-1.21) | 1.42E-01  | 0.44  | 0                     | 1.06 (0.93-1.20) | 2.25E-01      |  |
| rs4938561         | 118718485 | T/C       | 0.24 | 0.24    | O/O         | 1.00 (0.82-1.21)                  | 9.63E-01  | 1.08 (0.97-1.20) | 1.45E-01  | 0.46  | 0                     | 1.06 (0.93-1.20) | 2.26E-01      |  |
| rs76109832        | 118755946 | C/T       | 0.04 | 0.04    | I/I         | 1.12 (0.73-1.72)                  | 6.07E-01  | 1.14 (0.90-1.43) | 2.70E-01  | 0.95  | 0                     | 1.13 (0.85-1.51) | 2.27E-01      |  |
| rs4938558         | 118717929 | C/T       | 0.24 | 0.23    | I/I         | 1.01 (0.83-1.22)                  | 9.55E-01  | 1.08 (0.97-1.20) | 1.66E-01  | 0.53  | 0                     | 1.06 (0.93-1.21) | 2.29E-01      |  |
| rs7102433         | 118786829 | A/G       | 0.01 | 0.01    | I/I         | 0.19 (0.05-0.82)                  | 2.55E-02  | 1.00 (0.65-1.53) | 9.87E-01  | 0.03  | 78                    | 0.63 (0.31-1.28) | 2.29E-01      |  |
| rs7116715         | 118719742 | T/C       | 0.24 | 0.24    | I/I         | 0.99 (0.82-1.20)                  | 9.52E-01  | 1.08 (0.97-1.20) | 1.46E-01  | 0.45  | 0                     | 1.06 (0.93-1.20) | 2.30E-01      |  |
| rs11602869        | 118554448 | G/A       | 0.33 | 0.32    | I/I         | 1.05 (0.88-1.25)                  | 5.77E-01  | 1.05 (0.96-1.16) | 2.86E-01  | 0.97  | 0                     | 1.05 (0.93-1.19) | 2.30E-01      |  |
| rs7126172         | 118567257 | A/G       | 0.34 | 0.32    | I/I         | 1.04 (0.87-1.23)                  | 6.80E-01  | 1.06 (0.96-1.17) | 2.50E-01  | 0.83  | 0                     | 1.05 (0.94-1.18) | 2.33E-01      |  |
| rs10892298        | 118724336 | T/C       | 0.24 | 0.24    | I/I         | 0.99 (0.82-1.20)                  | 9.28E-01  | 1.08 (0.97-1.21) | 1.47E-01  | 0.43  | 0                     | 1.06 (0.93-1.20) | 2.39E-01      |  |
| rs2156753         | 118718768 | A/G       | 0.25 | 0.24    | I/I         | 0.98 (0.80-1.19)                  | 8.13E-01  | 1.09 (0.98-1.21) | 1.25E-01  | 0.34  | 0                     | 1.06 (0.92-1.20) | 2.41E-01      |  |
| chr11:118566809:D | 118566809 | indel/C   | 0.33 | 0.32    | I/I         | 1.03 (0.87-1.23)                  | 6.90E-01  | 1.06 (0.96-1.17) | 2.58E-01  | 0.83  | 0                     | 1.05 (0.93-1.18) | 2.42E-01      |  |
| rs7104519         | 118708266 | G/T       | 0.24 | 0.23    | I/I         | 1.00 (0.82-1.21)                  | 9.63E-01  | 1.08 (0.97-1.20) | 1.60E-01  | 0.47  | 0                     | 1.06 (0.93-1.21) | 2.44E-01      |  |
| chr11:118721494:I | 118721494 | AT/A      | 0.24 | 0.24    | I/I         | 0.99 (0.82-1.20)                  | 9.32E-01  | 1.08 (0.97-1.20) | 1.53E-01  | 0.44  | 0                     | 1.06 (0.93-1.20) | 2.44E-01      |  |
| rs190112966       | 118781340 | C/T       | 0.01 | 0.01    | I/I         | 0.20 (0.05-0.82)                  | 2.60E-02  | 1.01 (0.65-1.57) | 9.77E-01  | 0.03  | 78                    | 0.63 (0.31-1.31) | 2.46E-01      |  |
| rs7926599         | 118781530 | G/C       | 0.01 | 0.01    | I/I         | 0.20 (0.05-0.82)                  | 2.61E-02  | 1.01 (0.65-1.57) | 9.76E-01  | 0.03  | 78                    | 0.63 (0.31-1.31) | 2.47E-01      |  |
| rs2156752         | 118718827 | C/T       | 0.25 | 0.24    | I/I         | 1.02 (0.84-1.24)                  | 8.69E-01  | 1.07 (0.96-1.19) | 2.06E-01  | 0.64  | 0                     | 1.06 (0.93-1.21) | 2.47E-01      |  |
| rs2156750         | 118719254 | T/C       | 0.24 | 0.24    | I/I         | 0.99 (0.82-1.20)                  | 9.52E-01  | 1.08 (0.97-1.20) | 1.61E-01  | 0.46  | 0                     | 1.05 (0.93-1.20) | 2.47E-01      |  |
| rs7105658         | 118712270 | C/T       | 0.18 | 0.19    | I/I         | 0.99 (0.81-1.22)                  | 9.50E-01  | 0.92 (0.82-1.04) | 1.90E-01  | 0.55  | 0                     | 0.94 (0.82-1.09) | 2.53E-01      |  |
| rs2156749         | 118719405 | C/G       | 0.24 | 0.24    | I/I         | 0.99 (0.82-1.20)                  | 9.52E-01  | 1.08 (0.97-1.20) | 1.68E-01  | 0.47  | 0                     | 1.05 (0.92-1.20) | 2.55E-01      |  |
| rs4474473         | 118553889 | T/G       | 0.33 | 0.32    | I/I         | 1.03 (0.86-1.23)                  | 7.42E-01  | 1.06 (0.96-1.17) | 2.59E-01  | 0.80  | 0                     | 1.05 (0.93-1.18) | 2.58E-01      |  |
| rs11605069        | 118554436 | T/G       | 0.33 | 0.31    | I/I         | 1.04 (0.87-1.24)                  | 6.95E-01  | 1.06 (0.96-1.17) | 2.77E-01  | 0.85  | 0                     | 1.05 (0.93-1.18) | 2.58E-01      |  |
| rs2187491         | 118718972 | T/C       | 0.24 | 0.24    | I/I         | 0.99 (0.82-1.20)                  | 9.37E-01  | 1.08 (0.97-1.20) | 1.69E-01  | 0.46  | 0                     | 1.05 (0.92-1.20) | 2.61E-01      |  |
| rs2156751         | 118718856 | A/G       | 0.24 | 0.24    | I/I         | 1.00 (0.82-1.21)                  | 9.92E-01  | 1.07 (0.97-1.20) | 1.83E-01  | 0.52  | 0                     | 1.05 (0.92-1.20) | 2.62E-01      |  |
| rs4936440         | 118720684 | C/G       | 0.24 | 0.24    | I/I         | 0.99 (0.82-1.20)                  | 9.52E-01  | 1.08 (0.97-1.20) | 1.76E-01  | 0.48  | 0                     | 1.05 (0.92-1.20) | 2.65E-01      |  |
| rs643090          | 118567115 | T/C       | 0.35 | 0.34    | I/I         | 1.04 (0.88-1.23)                  | 6.24E-01  | 1.05 (0.95-1.16) | 3.15E-01  | 0.95  | 0                     | 1.05 (0.93-1.18) | 2.66E-01      |  |
| rs4938566         | 118721189 | A/T       | 0.24 | 0.24    | I/I         | 0.99 (0.82-1.20)                  | 9.52E-01  | 1.08 (0.97-1.20) | 1.77E-01  | 0.48  | 0                     | 1.05 (0.92-1.20) | 2.67E-01      |  |
| rs4938567         | 118721249 | A/G       | 0.24 | 0.24    | I/I         | 0.99 (0.82-1.20)                  | 9.52E-01  | 1.08 (0.97-1.20) | 1.77E-01  | 0.48  | 0                     | 1.05 (0.92-1.20) | 2.67E-01      |  |
| rs184790848       | 118714099 | C/T       | 0.02 | 0.03    | I/I         | 0.66 (0.38-1.15)                  | 1.42E-01  | 0.94 (0.70-1.27) | 7.02E-01  | 0.27  | 19                    | 0.85 (0.59-1.24) | 2.70E-01      |  |
| chr11:118727573:D | 118727573 | TC/T      | 0.24 | 0.23    | I/I         | 1.00 (0.82-1.21)                  | 9.96E-01  | 1.07 (0.96-1.20) | 1.97E-01  | 0.53  | 0                     | 1.05 (0.92-1.20) | 2.76E-01      |  |
| rs6589689         | 118622744 | A/G       | 0.02 | 0.01    | O/I         | 1.41 (0.79-2.53)                  | 2.51E-01  | 1.12 (0.74-1.69) | 5.80E-01  | 0.54  | 0                     | 1.20 (0.76-1.90) | 2.80E-01      |  |
| rs58508419        | 118762102 | G/A       | 0.01 | 0.01    | I/I         | 0.10 (0.01-0.77)                  | 2.69E-02  | 1.02 (0.67-1.56) | 9.09E-01  | 0.03  | 79                    | 0.54 (0.23-1.28) | 2.81E-01      |  |
| rs644867          | 118567545 | A/G       | 0.34 | 0.32    | I/I         | 1.02 (0.86-1.21)                  | 8.17E-01  | 1.06 (0.96-1.17) | 2.63E-01  | 0.72  | 0                     | 1.05 (0.93-1.18) | 2.85E-01      |  |
| rs2156755         | 118726230 | G/A       | 0.24 | 0.23    | I/I         | 1.00 (0.82-1.21)                  | 9.85E-01  | 1.07 (0.96-1.19) | 2.02E-01  | 0.52  | 0                     | 1.05 (0.92-1.20) | 2.85E-01      |  |
| rs7103314         | 118723537 | A/G       | 0.24 | 0.24    | I/I         | 0.99 (0.82-1.21)                  | 9.53E-01  | 1.07 (0.96-1.19) | 1.96E-01  | 0.50  | 0                     | 1.05 (0.92-1.20) | 2.87E-01      |  |
| rs644498          | 11856748  |           |      |         |             |                                   |           |                  |           |       |                       |                  |               |  |

**Supplementary Table 11.** Association analysis in *CXCR5*

| SNP               | BP        | Alleles   |      | MAF  | Observed or Imputed in Dataset1/2 | Dataset 1        |             | Dataset 2        |             | Test of heterogeneity |       | Meta analysis    |             |
|-------------------|-----------|-----------|------|------|-----------------------------------|------------------|-------------|------------------|-------------|-----------------------|-------|------------------|-------------|
|                   |           | maj / min | Case |      |                                   | Control          | OR (95% CI) | P                | OR (95% CI) | P                     | $P_Q$ | $I^2$            | OR (95% CI) |
| chr11:118563703:1 | 118563703 | G/GA      | 0.33 | 0.32 | I/I                               | 1.04 (0.88-1.24) | 6.33E-01    | 1.05 (0.95-1.16) | 3.42E-01    | 0.95                  | 0     | 1.05 (0.93-1.18) | 2.90E-01    |
| rs11217062        | 118725420 | G/A       | 0.24 | 0.23 | I/I                               | 1.00 (0.82-1.21) | 9.85E-01    | 1.07 (0.96-1.19) | 2.08E-01    | 0.53                  | 0     | 1.05 (0.92-1.20) | 2.91E-01    |
| rs7119568         | 118723753 | T/A       | 0.18 | 0.19 | I/I                               | 0.97 (0.79-1.20) | 8.09E-01    | 0.94 (0.83-1.05) | 2.82E-01    | 0.75                  | 0     | 0.95 (0.82-1.09) | 2.98E-01    |
| rs117235696       | 118803193 | T/G       | 0.03 | 0.03 | I/I                               | 1.01 (0.67-1.54) | 9.50E-01    | 0.84 (0.63-1.10) | 2.04E-01    | 0.45                  | 0     | 0.88 (0.64-1.21) | 2.99E-01    |
| rs11600378        | 118803842 | A/G       | 0.03 | 0.03 | I/I                               | 1.01 (0.67-1.54) | 9.50E-01    | 0.84 (0.63-1.10) | 2.05E-01    | 0.45                  | 0     | 0.88 (0.64-1.21) | 3.00E-01    |
| rs2230321         | 118765087 | C/T       | 0.01 | 0.01 | O/O                               | 0.09 (0.01-0.67) | 1.87E-02    | 1.05 (0.70-1.59) | 8.01E-01    | 0.02                  | 82    | 0.53 (0.22-1.25) | 3.00E-01    |
| rs77638281        | 118811315 | G/A       | 0.03 | 0.04 | I/I                               | 1.06 (0.71-1.59) | 7.86E-01    | 0.82 (0.62-1.08) | 1.61E-01    | 0.31                  | 3     | 0.88 (0.64-1.21) | 3.01E-01    |
| rs73575405        | 118764117 | G/A       | 0.01 | 0.01 | I/I                               | 0.10 (0.01-0.77) | 2.68E-02    | 1.04 (0.69-1.57) | 8.59E-01    | 0.03                  | 79    | 0.54 (0.23-1.29) | 3.05E-01    |
| rs4938569         | 118721972 | A/G       | 0.24 | 0.24 | I/I                               | 0.99 (0.82-1.20) | 9.40E-01    | 1.07 (0.96-1.19) | 2.09E-01    | 0.50                  | 0     | 1.05 (0.92-1.20) | 3.06E-01    |
| rs11605265        | 118805144 | G/A       | 0.03 | 0.03 | I/I                               | 1.01 (0.67-1.54) | 9.50E-01    | 0.84 (0.63-1.11) | 2.14E-01    | 0.46                  | 0     | 0.89 (0.64-1.22) | 3.09E-01    |
| rs143711539       | 118804671 | G/A       | 0.03 | 0.03 | I/I                               | 1.01 (0.67-1.54) | 9.50E-01    | 0.84 (0.63-1.11) | 2.15E-01    | 0.46                  | 0     | 0.89 (0.64-1.22) | 3.10E-01    |
| rs76160025        | 118782802 | C/T       | 0.02 | 0.02 | I/I                               | 0.81 (0.42-1.58) | 5.39E-01    | 1.32 (0.93-1.86) | 1.16E-01    | 0.20                  | 38    | 1.15 (0.74-1.78) | 3.16E-01    |
| rs77916839        | 118798780 | G/C       | 0.03 | 0.03 | I/I                               | 1.01 (0.66-1.54) | 9.59E-01    | 0.84 (0.64-1.12) | 2.31E-01    | 0.48                  | 0     | 0.89 (0.64-1.22) | 3.24E-01    |
| rs492471          | 118689745 | C/T       | 0.06 | 0.07 | I/I                               | 0.94 (0.68-1.30) | 6.96E-01    | 0.91 (0.75-1.11) | 3.59E-01    | 0.90                  | 0     | 0.92 (0.73-1.16) | 3.25E-01    |
| rs659969          | 118549803 | C/T       | 0.34 | 0.33 | I/I                               | 1.03 (0.87-1.22) | 7.61E-01    | 1.05 (0.95-1.16) | 3.34E-01    | 0.83                  | 0     | 1.04 (0.93-1.17) | 3.27E-01    |
| rs610664          | 118556691 | A/G       | 0.33 | 0.32 | I/I                               | 1.04 (0.87-1.23) | 6.77E-01    | 1.04 (0.95-1.15) | 3.71E-01    | 0.94                  | 0     | 1.04 (0.93-1.17) | 3.27E-01    |
| rs11217068        | 118729283 | C/T       | 0.18 | 0.19 | I/I                               | 1.00 (0.82-1.23) | 9.60E-01    | 0.93 (0.83-1.05) | 2.35E-01    | 0.52                  | 0     | 0.95 (0.82-1.10) | 3.28E-01    |
| rs57231586        | 118761159 | G/T       | 0.01 | 0.01 | I/I                               | 0.10 (0.01-0.74) | 2.45E-02    | 1.06 (0.70-1.60) | 7.92E-01    | 0.02                  | 80    | 0.54 (0.23-1.29) | 3.31E-01    |
| rs9735317         | 118725383 | C/T       | 0.17 | 0.18 | I/I                               | 0.97 (0.79-1.20) | 8.04E-01    | 0.94 (0.84-1.06) | 3.22E-01    | 0.79                  | 0     | 0.95 (0.82-1.10) | 3.31E-01    |
| rs4938522         | 118548671 | A/T       | 0.34 | 0.33 | I/I                               | 1.03 (0.87-1.22) | 7.61E-01    | 1.05 (0.95-1.15) | 3.45E-01    | 0.84                  | 0     | 1.04 (0.93-1.17) | 3.36E-01    |
| rs4938523         | 118548838 | G/T       | 0.34 | 0.33 | I/I                               | 1.03 (0.87-1.22) | 7.61E-01    | 1.05 (0.95-1.15) | 3.45E-01    | 0.84                  | 0     | 1.04 (0.93-1.17) | 3.36E-01    |
| rs647878          | 118549459 | G/A       | 0.34 | 0.33 | I/I                               | 1.03 (0.87-1.22) | 7.61E-01    | 1.05 (0.95-1.15) | 3.45E-01    | 0.84                  | 0     | 1.04 (0.93-1.17) | 3.36E-01    |
| rs12276533        | 118724116 | G/A       | 0.18 | 0.18 | I/I                               | 0.97 (0.79-1.20) | 7.95E-01    | 0.94 (0.84-1.06) | 3.38E-01    | 0.80                  | 0     | 0.95 (0.82-1.10) | 3.42E-01    |
| rs571751          | 118556797 | A/C       | 0.33 | 0.32 | I/I                               | 1.04 (0.87-1.23) | 6.66E-01    | 1.04 (0.95-1.15) | 3.95E-01    | 0.97                  | 0     | 1.04 (0.93-1.17) | 3.42E-01    |
| rs113577950       | 118738512 | T/A       | 0.24 | 0.23 | I/I                               | 1.00 (0.82-1.21) | 9.87E-01    | 1.06 (0.96-1.19) | 2.58E-01    | 0.57                  | 0     | 1.04 (0.92-1.19) | 3.43E-01    |
| rs9971606         | 118779681 | T/C       | 0.01 | 0.01 | I/I                               | 0.38 (0.13-1.08) | 7.03E-02    | 1.00 (0.66-1.52) | 9.82E-01    | 0.09                  | 65    | 0.76 (0.42-1.38) | 3.43E-01    |
| rs643104          | 118567125 | T/C       | 0.33 | 0.32 | I/I                               | 1.03 (0.86-1.22) | 7.72E-01    | 1.05 (0.95-1.16) | 3.51E-01    | 0.84                  | 0     | 1.04 (0.93-1.17) | 3.45E-01    |
| rs514143          | 118558449 | G/A       | 0.34 | 0.32 | I/I                               | 1.03 (0.87-1.22) | 7.39E-01    | 1.05 (0.95-1.15) | 3.67E-01    | 0.88                  | 0     | 1.04 (0.93-1.17) | 3.47E-01    |
| rs692848          | 118559709 | G/A       | 0.33 | 0.32 | I/I                               | 1.03 (0.86-1.22) | 7.63E-01    | 1.05 (0.95-1.15) | 3.58E-01    | 0.85                  | 0     | 1.04 (0.92-1.17) | 3.48E-01    |
| rs11605658        | 118805220 | C/T       | 0.03 | 0.03 | I/I                               | 1.05 (0.69-1.58) | 8.34E-01    | 0.84 (0.63-1.11) | 2.15E-01    | 0.39                  | 0     | 0.89 (0.65-1.23) | 3.49E-01    |
| rs112965917       | 118725189 | T/A       | 0.04 | 0.03 | I/I                               | 1.13 (0.75-1.70) | 5.72E-01    | 1.10 (0.85-1.42) | 4.59E-01    | 0.93                  | 0     | 1.11 (0.82-1.50) | 3.54E-01    |
| rs478296          | 118567375 | T/C       | 0.33 | 0.32 | I/I                               | 1.02 (0.86-1.21) | 7.88E-01    | 1.05 (0.95-1.15) | 3.57E-01    | 0.82                  | 0     | 1.04 (0.92-1.17) | 3.55E-01    |
| rs118046730       | 118711376 | T/C       | 0.02 | 0.03 | I/I                               | 0.66 (0.38-1.16) | 1.47E-01    | 0.97 (0.72-1.31) | 8.59E-01    | 0.23                  | 30    | 0.87 (0.60-1.27) | 3.57E-01    |
| rs555356          | 118558078 | G/T       | 0.34 | 0.32 | I/I                               | 1.03 (0.87-1.22) | 7.39E-01    | 1.04 (0.95-1.15) | 3.83E-01    | 0.89                  | 0     | 1.04 (0.92-1.17) | 3.60E-01    |
| rs504206          | 118549253 | A/G       | 0.34 | 0.32 | I/I                               | 1.02 (0.86-1.21) | 8.44E-01    | 1.05 (0.95-1.16) | 3.40E-01    | 0.77                  | 0     | 1.04 (0.92-1.17) | 3.61E-01    |
| rs7114458         | 118566175 | G/A       | 0.34 | 0.32 | I/I                               | 1.02 (0.86-1.21) | 8.18E-01    | 1.05 (0.95-1.15) | 3.56E-01    | 0.79                  | 0     | 1.04 (0.92-1.17) | 3.66E-01    |
| rs625513          | 118555719 | A/C       | 0.33 | 0.32 | I/I                               | 1.03 (0.87-1.22) | 7.39E-01    | 1.04 (0.95-1.15) | 3.92E-01    | 0.90                  | 0     | 1.04 (0.92-1.17) | 3.67E-01    |
| rs693037          | 118553326 | C/T       | 0.34 | 0.32 | I/I                               | 1.03 (0.87-1.22) | 7.50E-01    | 1.04 (0.95-1.15) | 3.91E-01    | 0.89                  | 0     | 1.04 (0.92-1.17) | 3.70E-01    |
| rs538645          | 118711069 | T/C       | 0.23 | 0.23 | I/I                               | 1.01 (0.83-1.23) | 9.19E-01    | 1.06 (0.95-1.18) | 3.22E-01    | 0.69                  | 0     | 1.04 (0.91-1.19) | 3.71E-01    |
| rs642662          | 118567020 | A/G       | 0.33 | 0.32 | I/I                               | 1.02 (0.86-1.22) | 7.80E-01    | 1.04 (0.95-1.15) | 3.80E-01    | 0.85                  | 0     | 1.04 (0.92-1.17) | 3.73E-01    |
| rs486462          | 118559178 | T/C       | 0.33 | 0.32 | I/I                               | 1.03 (0.87-1.22) | 7.63E-01    | 1.04 (0.95-1.15) | 3.88E-01    | 0.87                  | 0     | 1.04 (0.92-1.17) | 3.73E-01    |
| rs58397111        | 118761591 | C/T       | 0.01 | 0.01 | I/I                               | 0.10 (0.01-0.77) | 2.69E-02    | 1.07 (0.71-1.62) | 7.35E-01    | 0.03                  | 80    | 0.56 (0.24-1.31) | 3.74E-01    |
| rs12277355        | 118729442 | C/T       | 0.18 | 0.19 | I/I                               | 1.01 (0.82-1.23) | 9.52E-01    | 0.94 (0.83-1.05) | 2.77E-01    | 0.55                  | 0     | 0.96 (0.83-1.10) | 3.74E-01    |
| rs11532015        | 118591765 | G/A       | 0.24 | 0.25 | I/I                               | 1.02 (0.85-1.24) | 8.10E-01    | 0.94 (0.84-1.04) | 2.29E-01    | 0.42                  | 0     | 0.96 (0.84-1.09) | 3.75E-01    |
| rs4331144         | 118554100 | A/G       | 0.34 | 0.32 | I/I                               | 1.03 (0.87-1.22) | 7.52E-01    | 1.04 (0.95-1.15) | 3.97E-01    | 0.88                  | 0     | 1.04 (0.92-1.17) | 3.76E-01    |
| rs585039          | 118563381 | C/A       | 0.34 | 0.32 | I/I                               | 1.03 (0.87-1.22) | 7.52E-01    | 1.04 (0.95-1.15) | 3.98E-01    | 0.88                  | 0     | 1.04 (0.92-1.17) | 3.77E-01    |
| rs11216942        | 118553488 | C/A       | 0.34 | 0.32 | I/I                               | 1.03 (0.87-1.22) | 7.52E-01    | 1.04 (0.95-1.15) | 4.01E-01    | 0.89                  | 0     | 1.04 (0.92-1.17) | 3.79E-01    |
| rs519848          | 118552715 | G/A       | 0.34 | 0.32 | I/I                               | 1.03 (0.87-1.22) | 7.54E-01    | 1.04 (0.95-1.15) | 4.04E-01    | 0.89                  | 0     | 1.04 (0.92-1.17) | 3.83E-01    |
| rs561845          | 118558827 | A/G       | 0.34 | 0.32 | I/I                               | 1.03 (0.87-1.22) | 7.58E-01    | 1.04 (0.95-1.15) | 4.03E-01    | 0.88                  | 0     | 1.04 (0.92-1.17) | 3.83E-01    |
| rs549370          | 118552842 | C/A       | 0.34 | 0.32 | I/I                               | 1.03 (0.87-1.22) | 7.52E-01    | 1.04 (0.95-1.15) | 4.06E-01    | 0.89                  | 0     | 1.04 (0.92-1.17) | 3.84E-01    |
| rs654792          | 118552996 | G/T       | 0.34 | 0.32 | I/I                               | 1.03 (0.87-1.22) | 7.52E-01    | 1.04 (0.95-1.15) | 4.06E-01    | 0.89                  | 0     | 1.04 (0.92-1.17) | 3.84E-01    |
| rs12794726        | 118566313 | C/T       | 0.33 | 0.32 | I/I                               | 1.02 (0.86-1.21) | 8.07E-01    | 1.04 (0.95-1.15) | 3.83E-01    | 0.82                  | 0     | 1.04 (0.92-1.17) | 3.85E-01    |
| rs478371          | 118565336 | G/A       | 0.34 | 0.32 | I/I                               | 1.02 (0.86-1.21) | 8.06E-01    | 1.04 (0.95-1.15) | 3.83E-01    | 0.83                  | 0     | 1.04 (0.92-1.17) | 3.85E-01    |
| rs7114216         | 118566234 | A/G       | 0.34 | 0.32 | I/I                               | 1.02 (0.86-1.21) | 8.06E-01    | 1.04 (0.95-1.15) | 3.84E-01    | 0.83                  | 0     | 1.04 (0.92-1.17) | 3.85E-01    |
| rs508579          | 118559084 | G/C       | 0.34 | 0.32 | I/I                               | 1.03 (0.87-1.22) | 7.58E-01    | 1.04 (0.95-1.15) | 4.06E-01    | 0.88                  | 0     | 1.04 (0.92-1.17) | 3.85E-01    |
| rs638301          | 118559003 | A/G       | 0.34 | 0.32 | I/I                               | 1.03 (0.87-1.22) | 7.58E-01    | 1.04 (0.95-1.15) | 4.06E-01    | 0.88                  | 0     | 1.04 (0.92-1.17) | 3.85E-01    |
| rs510408          | 118558901 | G/C       | 0.34 | 0.32 | I/I                               | 1.03 (0.87-1.22) | 7.58E-01    | 1.04 (0.95-1.15) | 4.06E-01    | 0.88                  | 0     | 1.04 (0.92-1.17) | 3.85E-01    |
| rs638805          | 118558889 | G/T       | 0.34 | 0.32 | I/I                               | 1.03 (0.87-1.22) | 7.58E-01    | 1.04 (0.95-1.15) | 4.06E-01    | 0.88                  | 0     | 1.04 (0.92-1.17) | 3.85E-01    |
| chr11:118552611:1 | 118552611 | T/TTG     | 0.34 | 0.32 | I/I                               | 1.03 (0.87-1.22) | 7.52E-01    | 1.04 (0.95-1.15) | 4.09E-01    | 0.89                  | 0     | 1.04 (0.92-1.17) | 3.86E-01    |
| rs533144          | 118559247 | C/A       | 0.34 | 0.32 | I/I                               | 1.03 (0.87-1.22) | 7.58E-01    | 1.04 (0.95-1.15) | 4.08E-01    | 0.88                  | 0     | 1.04 (0.92-1.17) | 3.87E-01    |
| rs525485          | 118555754 | G/A       | 0.33 | 0.32 | I/I                               | 1.03 (0.87-1.22) | 7.39E-01    | 1.04 (0.94-1.15) | 4.17E-01    | 0.92                  | 0     | 1.04 (0.92-1.17) | 3.87E-01    |
| rs558593          | 118562520 | C/T       | 0.33 | 0.32 | I/I                               | 1.03 (0.87-1.22) | 7.21E-01    | 1.04 (0.94-1.15) | 4.27E-01    | 0.94                  | 0     | 1.04 (0.92-1.17) | 3.88E-01    |
| rs12800792        | 118551730 | T/A       | 0.33 | 0.32 | I/I                               | 1.02 (0.86-1.22) | 8.02E-01    | 1.04 (0.95-1.15) | 3.90E-01    | 0.83                  | 0     | 1.04 (0.92-1.17) | 3.89E-01    |
| chr11:118558097:D | 118558097 | CCT/C     | 0.34 | 0.32 | I/I                               | 1.03 (0.87-1.22) | 7.58E-01    | 1.04 (0.95-1.15) | 4.12E-01    | 0.89                  | 0     | 1.04 (0.92-1.17) | 3.91E-01    |
| rs516153          | 118564762 | C/A       | 0.34 | 0.32 | I/I                               | 1.03 (0.87-1.22) | 7.63E-01    | 1.04 (0.95-1.15) | 4.10E-01    | 0.88                  | 0     | 1.04 (0.92-1.17) | 3.91E-01    |
| rs6589695         | 118644323 | G/C       | 0.02 | 0.03 | I/I                               | 1.12 (0.70-1.78) | 6.47E-01    | 0.80 (0.57-1.12) | 1.94E-01    | 0.26                  | 21    | 0.88 (0.61-1.28) | 3.94E-01    |
| rs613377          | 118556084 | C/T       | 0.34 | 0.32 | I/I                               | 1.03 (0.86-1.22) | 7.70E-01    | 1.04 (0.94-1.15) | 4.19E-01    | 0.88                  | 0     | 1.04 (0.92-1.17) | 4.01E-01    |
| rs11606719        | 118782474 | C/G       | 0.02 | 0.02 | I/I                               | 0.52 (0.24-1.11) | 9.25E-02    | 1.01 (0.71-1.44) | 9.42E-01    | 0.12                  | 59    | 0.84 (0.52-1.34) | 4.02E-01    |
| rs542613          | 118567084 | G/A       | 0.33 | 0.32 | I/I                               | 1.03 (0.87-1.22) | 7.40E-01    | 1.04 (0.94-1.15) | 4.36E-01    | 0.92                  | 0     | 1.04 (0.92-1.17) | 4.03E-01    |
| rs471227          | 118564601 | T/C       | 0.34 | 0.32 | I/I                               | 1.03 (0.87-1.22) | 7.63E-01    |                  |             |                       |       |                  |             |



Supplementary Table 11. Association analysis in CXCR5

| SNP               | BP        | Alleles  |      | MAF  | Observed or Imputed in Dataset1/2 | Dataset 1        |             | Dataset 2        |             | Test of heterogeneity |       | Meta analysis    |             |   |
|-------------------|-----------|----------|------|------|-----------------------------------|------------------|-------------|------------------|-------------|-----------------------|-------|------------------|-------------|---|
|                   |           | maj/ min | Case |      |                                   | Control          | OR (95% CI) | P                | OR (95% CI) | P                     | $P_Q$ | $I^2$            | OR (95% CI) | P |
|                   |           |          |      |      |                                   |                  |             |                  |             |                       |       |                  |             |   |
| rs592280          | 118553218 | T/C      | 0.34 | 0.32 | I/I                               | 1.03 (0.87-1.22) | 7.52E-01    | 1.04 (0.94-1.15) | 4.32E-01    | 0.91                  | 0     | 1.04 (0.92-1.17) | 4.05E-01    |   |
| chr11:118551226:D | 118551226 | GA/G     | 0.34 | 0.32 | I/I                               | 1.02 (0.86-1.21) | 8.11E-01    | 1.04 (0.95-1.15) | 4.05E-01    | 0.84                  | 0     | 1.04 (0.92-1.17) | 4.05E-01    |   |
| rs7118009         | 118707559 | C/T      | 0.17 | 0.18 | I/I                               | 1.00 (0.81-1.23) | 9.99E-01    | 0.94 (0.83-1.06) | 3.27E-01    | 0.63                  | 0     | 0.96 (0.83-1.11) | 4.06E-01    |   |
| rs546890          | 118557198 | T/C      | 0.33 | 0.32 | I/I                               | 1.03 (0.87-1.22) | 7.58E-01    | 1.04 (0.94-1.15) | 4.32E-01    | 0.90                  | 0     | 1.04 (0.92-1.17) | 4.07E-01    |   |
| rs2508573         | 118555383 | C/T      | 0.43 | 0.42 | I/I                               | 0.99 (0.84-1.17) | 9.15E-01    | 1.05 (0.96-1.15) | 2.96E-01    | 0.55                  | 0     | 1.03 (0.92-1.16) | 4.07E-01    |   |
| rs527475          | 118563239 | G/A      | 0.33 | 0.32 | I/I                               | 1.03 (0.87-1.22) | 7.52E-01    | 1.04 (0.94-1.15) | 4.35E-01    | 0.92                  | 0     | 1.04 (0.92-1.17) | 4.07E-01    |   |
| rs7924647         | 118728479 | A/G      | 0.18 | 0.18 | I/I                               | 0.99 (0.80-1.22) | 9.11E-01    | 0.95 (0.84-1.07) | 3.65E-01    | 0.73                  | 0     | 0.96 (0.83-1.11) | 4.08E-01    |   |
| rs656575          | 118549908 | T/G      | 0.33 | 0.32 | I/I                               | 1.03 (0.87-1.22) | 7.50E-01    | 1.04 (0.94-1.15) | 4.39E-01    | 0.91                  | 0     | 1.04 (0.92-1.17) | 4.10E-01    |   |
| rs12796373        | 118554939 | G/A      | 0.34 | 0.32 | I/I                               | 1.03 (0.86-1.22) | 7.69E-01    | 1.04 (0.94-1.15) | 4.31E-01    | 0.89                  | 0     | 1.04 (0.92-1.17) | 4.10E-01    |   |
| rs12285122        | 118733830 | G/A      | 0.18 | 0.19 | I/I                               | 1.00 (0.82-1.23) | 9.95E-01    | 0.94 (0.84-1.06) | 3.32E-01    | 0.63                  | 0     | 0.96 (0.83-1.11) | 4.11E-01    |   |
| rs12799314        | 118551597 | G/A      | 0.34 | 0.32 | I/I                               | 1.02 (0.86-1.21) | 8.11E-01    | 1.04 (0.95-1.15) | 4.13E-01    | 0.85                  | 0     | 1.04 (0.92-1.16) | 4.12E-01    |   |
| rs625918          | 118559542 | C/T      | 0.33 | 0.32 | I/I                               | 1.01 (0.85-1.20) | 8.76E-01    | 1.04 (0.95-1.15) | 3.86E-01    | 0.77                  | 0     | 1.04 (0.92-1.16) | 4.14E-01    |   |
| rs12272981        | 118709600 | A/G      | 0.17 | 0.18 | I/I                               | 1.00 (0.81-1.23) | 9.95E-01    | 0.94 (0.84-1.06) | 3.37E-01    | 0.64                  | 0     | 0.96 (0.83-1.11) | 4.14E-01    |   |
| rs7108905         | 118712427 | C/G      | 0.17 | 0.18 | I/I                               | 1.00 (0.81-1.23) | 9.89E-01    | 0.94 (0.84-1.06) | 3.50E-01    | 0.65                  | 0     | 0.96 (0.83-1.11) | 4.24E-01    |   |
| rs61900138        | 118782222 | T/C      | 0.02 | 0.02 | I/I                               | 0.85 (0.42-1.73) | 6.59E-01    | 1.21 (0.89-1.64) | 2.24E-01    | 0.38                  | 0     | 1.09 (0.72-1.66) | 4.26E-01    |   |
| rs507080          | 118549582 | G/A      | 0.34 | 0.33 | I/I                               | 1.03 (0.87-1.22) | 7.62E-01    | 1.04 (0.94-1.14) | 4.59E-01    | 0.92                  | 0     | 1.03 (0.92-1.16) | 4.31E-01    |   |
| rs1519982         | 118565231 | C/T      | 0.33 | 0.32 | I/I                               | 1.02 (0.86-1.22) | 7.81E-01    | 1.04 (0.94-1.14) | 4.51E-01    | 0.90                  | 0     | 1.03 (0.92-1.16) | 4.32E-01    |   |
| rs1784298         | 118548665 | T/C      | 0.34 | 0.33 | I/I                               | 1.03 (0.87-1.22) | 7.61E-01    | 1.04 (0.94-1.14) | 4.63E-01    | 0.92                  | 0     | 1.03 (0.92-1.16) | 4.34E-01    |   |
| rs502601          | 118565679 | G/A      | 0.33 | 0.32 | I/I                               | 1.02 (0.86-1.21) | 8.21E-01    | 1.04 (0.94-1.15) | 4.38E-01    | 0.85                  | 0     | 1.03 (0.92-1.16) | 4.37E-01    |   |
| rs673770          | 118550601 | T/G      | 0.34 | 0.32 | O/O                               | 1.03 (0.87-1.22) | 7.58E-01    | 1.04 (0.94-1.14) | 4.70E-01    | 0.93                  | 0     | 1.03 (0.92-1.16) | 4.38E-01    |   |
| chr11:118563700:1 | 118563700 | C/CG     | 0.33 | 0.32 | I/I                               | 1.02 (0.86-1.22) | 7.82E-01    | 1.04 (0.94-1.15) | 4.59E-01    | 0.89                  | 0     | 1.03 (0.92-1.16) | 4.38E-01    |   |
| rs11216982        | 118590864 | G/A      | 0.24 | 0.24 | I/I                               | 1.03 (0.85-1.25) | 7.51E-01    | 0.94 (0.84-1.05) | 2.67E-01    | 0.41                  | 0     | 0.97 (0.85-1.10) | 4.42E-01    |   |
| rs28452542        | 118549291 | C/T      | 0.34 | 0.33 | I/I                               | 1.02 (0.86-1.21) | 8.05E-01    | 1.04 (0.94-1.14) | 4.57E-01    | 0.88                  | 0     | 1.03 (0.92-1.16) | 4.47E-01    |   |
| rs6589706         | 118747813 | G/A      | 0.50 | 0.48 | O/O                               | 0.98 (0.84-1.16) | 8.26E-01    | 1.05 (0.96-1.15) | 3.00E-01    | 0.49                  | 0     | 1.03 (0.92-1.15) | 4.47E-01    |   |
| rs12286723        | 118734640 | C/T      | 0.18 | 0.19 | O/O                               | 1.01 (0.82-1.24) | 9.16E-01    | 0.94 (0.84-1.06) | 3.36E-01    | 0.57                  | 0     | 0.96 (0.83-1.11) | 4.48E-01    |   |
| rs78755429        | 118777978 | C/A      | 0.02 | 0.02 | I/I                               | 1.25 (0.71-2.21) | 4.43E-01    | 1.07 (0.76-1.50) | 6.89E-01    | 0.65                  | 0     | 1.12 (0.75-1.68) | 4.55E-01    |   |
| rs7122511         | 118708786 | C/A      | 0.17 | 0.18 | I/I                               | 1.00 (0.81-1.23) | 9.94E-01    | 0.95 (0.84-1.07) | 3.92E-01    | 0.67                  | 0     | 0.96 (0.83-1.11) | 4.67E-01    |   |
| rs77921170        | 118708785 | C/A      | 0.17 | 0.18 | I/I                               | 1.00 (0.81-1.23) | 9.94E-01    | 0.95 (0.84-1.07) | 3.92E-01    | 0.67                  | 0     | 0.96 (0.83-1.11) | 4.67E-01    |   |
| rs545104          | 118591352 | C/T      | 0.37 | 0.37 | I/I                               | 1.05 (0.89-1.25) | 5.61E-01    | 1.02 (0.93-1.13) | 6.45E-01    | 0.79                  | 0     | 1.03 (0.92-1.16) | 4.84E-01    |   |
| rs79652716        | 118584498 | C/T      | 0.35 | 0.35 | I/I                               | 1.08 (0.91-1.28) | 3.73E-01    | 1.01 (0.92-1.11) | 7.96E-01    | 0.52                  | 0     | 1.03 (0.92-1.16) | 4.88E-01    |   |
| rs2186780         | 118605451 | C/T      | 0.20 | 0.20 | I/I                               | 1.09 (0.89-1.33) | 4.16E-01    | 1.02 (0.91-1.14) | 7.59E-01    | 0.58                  | 0     | 1.04 (0.90-1.19) | 4.89E-01    |   |
| rs7926282         | 118605914 | A/C      | 0.20 | 0.20 | I/I                               | 1.09 (0.89-1.33) | 4.16E-01    | 1.02 (0.91-1.14) | 7.68E-01    | 0.57                  | 0     | 1.04 (0.90-1.19) | 4.95E-01    |   |
| rs540800          | 118565651 | G/A      | 0.43 | 0.43 | O/O                               | 1.00 (0.84-1.17) | 9.58E-01    | 1.04 (0.95-1.14) | 4.12E-01    | 0.66                  | 0     | 1.03 (0.92-1.15) | 5.04E-01    |   |
| rs693306          | 118558333 | A/G      | 0.33 | 0.32 | I/I                               | 1.03 (0.87-1.22) | 7.58E-01    | 1.03 (0.93-1.13) | 5.66E-01    | 0.98                  | 0     | 1.03 (0.91-1.16) | 5.16E-01    |   |
| rs7122254         | 118553852 | T/C      | 0.33 | 0.32 | I/I                               | 1.01 (0.85-1.20) | 8.84E-01    | 1.03 (0.94-1.14) | 5.00E-01    | 0.84                  | 0     | 1.03 (0.91-1.16) | 5.17E-01    |   |
| rs4938524         | 118552074 | G/T      | 0.33 | 0.32 | I/I                               | 1.03 (0.87-1.23) | 7.01E-01    | 1.02 (0.93-1.13) | 6.28E-01    | 0.93                  | 0     | 1.03 (0.91-1.16) | 5.39E-01    |   |
| rs642530          | 118550756 | T/C      | 0.33 | 0.32 | I/I                               | 1.03 (0.87-1.22) | 7.62E-01    | 1.03 (0.93-1.13) | 5.95E-01    | 1.00                  | 0     | 1.03 (0.91-1.16) | 5.41E-01    |   |
| rs117361624       | 118568427 | C/T      | 0.04 | 0.04 | I/I                               | 1.11 (0.72-1.72) | 6.27E-01    | 1.05 (0.83-1.32) | 6.88E-01    | 0.81                  | 0     | 1.07 (0.80-1.42) | 5.50E-01    |   |
| rs6589673         | 118557483 | A/C      | 0.02 | 0.02 | I/I                               | 1.17 (0.66-2.07) | 5.85E-01    | 1.06 (0.76-1.48) | 7.19E-01    | 0.77                  | 0     | 1.09 (0.73-1.63) | 5.51E-01    |   |
| rs603486          | 118587347 | C/T      | 0.37 | 0.37 | I/I                               | 1.05 (0.89-1.25) | 5.32E-01    | 1.01 (0.92-1.12) | 7.63E-01    | 0.70                  | 0     | 1.03 (0.91-1.15) | 5.56E-01    |   |
| rs667982          | 118562767 | T/C      | 0.33 | 0.32 | I/I                               | 1.03 (0.87-1.22) | 7.53E-01    | 1.02 (0.93-1.13) | 6.40E-01    | 0.97                  | 0     | 1.03 (0.91-1.15) | 5.73E-01    |   |
| rs140110112       | 118629959 | G/A      | 0.04 | 0.04 | I/I                               | 1.07 (0.70-1.63) | 7.46E-01    | 1.05 (0.84-1.32) | 6.59E-01    | 0.94                  | 0     | 1.06 (0.80-1.40) | 5.85E-01    |   |
| chr11:118584623:D | 118584623 | A/AT     | 0.35 | 0.35 | I/I                               | 1.05 (0.89-1.25) | 5.45E-01    | 1.01 (0.92-1.11) | 8.28E-01    | 0.67                  | 0     | 1.02 (0.91-1.15) | 6.12E-01    |   |
| rs146541591       | 118791180 | T/C      | 0.02 | 0.02 | I/I                               | 1.60 (0.89-2.89) | 1.17E-01    | 0.93 (0.66-1.30) | 6.66E-01    | 0.12                  | 60    | 1.08 (0.72-1.63) | 6.39E-01    |   |
| rs112799932       | 118585146 | T/G      | 0.24 | 0.24 | I/I                               | 1.05 (0.87-1.27) | 6.18E-01    | 0.95 (0.86-1.06) | 3.93E-01    | 0.40                  | 0     | 0.98 (0.86-1.12) | 6.47E-01    |   |
| rs3916585         | 118812922 | C/G      | 0.15 | 0.15 | I/I                               | 0.86 (0.68-1.09) | 2.10E-01    | 1.02 (0.89-1.16) | 7.80E-01    | 0.22                  | 34    | 0.97 (0.83-1.14) | 6.59E-01    |   |
| rs150543079       | 118800061 | G/T      | 0.04 | 0.04 | I/I                               | 0.80 (0.52-1.23) | 3.04E-01    | 1.15 (0.90-1.46) | 2.53E-01    | 0.14                  | 53    | 1.04 (0.77-1.39) | 6.80E-01    |   |
| rs112996178       | 118609598 | C/T      | 0.23 | 0.24 | I/I                               | 1.04 (0.86-1.26) | 6.83E-01    | 0.96 (0.86-1.07) | 4.70E-01    | 0.48                  | 0     | 0.98 (0.86-1.12) | 6.93E-01    |   |
| rs506255          | 118566069 | C/A      | 0.09 | 0.09 | I/I                               | 1.05 (0.79-1.38) | 7.55E-01    | 1.02 (0.87-1.20) | 8.02E-01    | 0.88                  | 0     | 1.03 (0.84-1.25) | 7.04E-01    |   |
| rs2851460         | 118716563 | G/A      | 0.42 | 0.42 | I/I                               | 1.01 (0.86-1.19) | 8.99E-01    | 1.02 (0.93-1.12) | 7.18E-01    | 0.95                  | 0     | 1.02 (0.91-1.14) | 7.09E-01    |   |
| rs7934890         | 118655356 | C/T      | 0.23 | 0.23 | I/I                               | 1.10 (0.91-1.33) | 3.38E-01    | 0.99 (0.89-1.10) | 8.57E-01    | 0.36                  | 0     | 1.02 (0.89-1.16) | 7.22E-01    |   |
| rs55794678        | 118725204 | C/T      | 0.23 | 0.01 | I/I                               | 1.52 (0.83-2.80) | 1.77E-01    | 0.92 (0.63-1.34) | 6.69E-01    | 0.17                  | 47    | 1.06 (0.68-1.65) | 7.24E-01    |   |
| rs140026975       | 118594669 | A/C      | 0.23 | 0.23 | I/I                               | 1.04 (0.86-1.27) | 6.77E-01    | 0.96 (0.86-1.07) | 5.08E-01    | 0.49                  | 0     | 0.99 (0.86-1.13) | 7.35E-01    |   |
| rs4938559         | 118718061 | C/T      | 0.42 | 0.43 | I/I                               | 1.00 (0.85-1.18) | 9.98E-01    | 1.02 (0.93-1.12) | 7.21E-01    | 0.86                  | 0     | 1.01 (0.90-1.13) | 7.61E-01    |   |
| rs586763          | 118816304 | C/T      | 0.17 | 0.18 | O/O                               | 0.89 (0.71-1.11) | 2.91E-01    | 1.02 (0.90-1.15) | 7.57E-01    | 0.28                  | 14    | 0.98 (0.84-1.14) | 7.66E-01    |   |
| chr11:118625605:D | 118625605 | CAT/C    | 0.04 | 0.03 | I/I                               | 0.76 (0.46-1.25) | 2.81E-01    | 1.13 (0.89-1.44) | 3.13E-01    | 0.16                  | 50    | 1.01 (0.74-1.38) | 7.76E-01    |   |
| rs4938560         | 118718062 | A/G      | 0.42 | 0.43 | I/I                               | 1.00 (0.85-1.18) | 9.87E-01    | 1.02 (0.93-1.12) | 7.37E-01    | 0.86                  | 0     | 1.01 (0.90-1.13) | 7.83E-01    |   |
| rs112974653       | 118807637 | G/T      | 0.10 | 0.11 | I/I                               | 0.73 (0.55-0.99) | 4.00E-02    | 1.08 (0.93-1.25) | 3.25E-01    | 0.02                  | 81    | 0.97 (0.80-1.17) | 7.96E-01    |   |
| rs73009445        | 118744615 | G/A      | 0.04 | 0.04 | I/I                               | 0.78 (0.49-1.22) | 2.77E-01    | 1.12 (0.89-1.40) | 3.27E-01    | 0.16                  | 50    | 1.01 (0.76-1.35) | 7.99E-01    |   |
| rs4938589         | 118810405 | C/T      | 0.11 | 0.12 | O/I                               | 0.79 (0.60-1.04) | 8.78E-02    | 1.06 (0.92-1.22) | 4.34E-01    | 0.06                  | 72    | 0.97 (0.81-1.17) | 8.05E-01    |   |
| rs7943039         | 118603030 | G/A      | 0.24 | 0.24 | I/I                               | 1.05 (0.87-1.27) | 5.91E-01    | 0.97 (0.87-1.07) | 5.29E-01    | 0.44                  | 0     | 0.99 (0.87-1.13) | 8.06E-01    |   |
| rs77398170        | 118792278 | A/G      | 0.03 | 0.03 | I/I                               | 0.78 (0.49-1.25) | 3.08E-01    | 1.13 (0.87-1.48) | 3.50E-01    | 0.18                  | 45    | 1.02 (0.74-1.41) | 8.07E-01    |   |
| rs184012032       | 118595569 | G/A      | 0.03 | 0.03 | I/I                               | 0.74 (0.44-1.25) | 2.61E-01    | 1.06 (0.82-1.36) | 6.72E-01    | 0.23                  | 30    | 0.96 (0.69-1.33) | 8.12E-01    |   |
| rs184071181       | 118598936 | T/C      | 0.03 | 0.03 | I/I                               | 0.73 (0.43-1.23) | 2.34E-01    | 1.06 (0.83-1.37) | 6.32E-01    | 0.20                  | 39    | 0.96 (0.69-1.33) | 8.22E-01    |   |
| rs73001486        | 118629364 | G/A      | 0.24 | 0.24 | I/I                               | 1.05 (0.87-1.27) | 5.90E-01    | 0.97 (0.87-1.08) | 5.49E-01    | 0.44                  | 0     | 0.99 (0.87-1.13) | 8.26E-01    |   |
| rs11537150        | 118594517 | A/G      | 0.23 | 0.24 | I/I                               | 1.04 (0.86-1.27) | 6.56E-01    | 0.97 (0.87-1.08) | 6.14E-01    | 0.52                  | 0     | 0.99 (0.87-1.13) | 8.50E-01    |   |
| rs480958          | 118577990 | A/G      | 0.35 | 0.36 | O/O                               | 1.07 (0.90-1.26) | 4.33E-01    | 0.99 (0.90-1.09) | 7.75E-01    | 0.41                  | 0     | 1.01 (0.90-1.13) | 8.61E-01    |   |
| rs10892313        | 118809329 | G/A      | 0.11 | 0.12 | I/I                               | 0.76 (0.57-1.00) | 4.90E-02    | 1.08 (0.94-1.24) | 2.89E-01    | 0.03                  | 80    | 0.98 (0.81-1.17) | 8.78E-01    |   |
| rs17130875        | 118613674 | T/C      | 0.24 | 0.24 | I/I                               | 1.07 (0.89-1.29) | 4.93E-01    | 0.99 (0.89-1.10) | 7.97E-01    | 0.47                  | 0     | 1.01 (0.89-1.15) | 8.84E-01    |   |
| rs487177          | 118657297 | C        |      |      |                                   |                  |             |                  |             |                       |       |                  |             |   |

**Supplementary Table 11.** Association analysis in *CXCR5*

| SNP               | BP        | Alleles   |      | MAF     |             | Observed or Imputed in Dataset1/2 | Dataset 1 |                  | Dataset 2 |       | Test of heterogeneity |                  | Meta analysis |  |
|-------------------|-----------|-----------|------|---------|-------------|-----------------------------------|-----------|------------------|-----------|-------|-----------------------|------------------|---------------|--|
|                   |           | maj / min | Case | Control | OR (95% CI) |                                   | P         | OR (95% CI)      | P         | $P_Q$ | $I^2$                 | OR (95% CI)      | P             |  |
|                   |           |           |      |         |             |                                   |           |                  |           |       |                       |                  |               |  |
| rs112910608       | 118637475 | C/T       | 0.23 | 0.23    | I/I         | 1.06 (0.88-1.29)                  | 5.31E-01  | 0.99 (0.89-1.10) | 8.11E-01  | 0.51  | 0                     | 1.01 (0.88-1.15) | 8.97E-01      |  |
| rs3825057         | 118622985 | T/C       | 0.24 | 0.24    | I/I         | 1.05 (0.87-1.26)                  | 6.31E-01  | 0.98 (0.88-1.08) | 6.57E-01  | 0.52  | 0                     | 1.00 (0.88-1.13) | 9.04E-01      |  |
| rs75210328        | 118801296 | G/T       | 0.04 | 0.04    | I/I         | 0.86 (0.57-1.30)                  | 4.74E-01  | 1.07 (0.84-1.37) | 5.67E-01  | 0.36  | 0                     | 1.01 (0.75-1.35) | 9.22E-01      |  |
| rs77875650        | 118801577 | G/A       | 0.04 | 0.04    | I/I         | 0.86 (0.57-1.30)                  | 4.74E-01  | 1.07 (0.84-1.37) | 5.68E-01  | 0.36  | 0                     | 1.01 (0.75-1.35) | 9.23E-01      |  |
| rs11217022        | 118641606 | A/G       | 0.24 | 0.24    | I/I         | 1.06 (0.88-1.28)                  | 5.30E-01  | 0.98 (0.89-1.09) | 7.78E-01  | 0.49  | 0                     | 1.01 (0.88-1.15) | 9.24E-01      |  |
| rs10892282        | 118627778 | G/C       | 0.24 | 0.24    | I/I         | 1.05 (0.87-1.26)                  | 6.23E-01  | 0.98 (0.88-1.09) | 6.77E-01  | 0.53  | 0                     | 1.00 (0.88-1.13) | 9.27E-01      |  |
| chr11:118611794:D | 118611794 | TA/T      | 0.24 | 0.24    | I/I         | 1.06 (0.88-1.27)                  | 5.58E-01  | 0.97 (0.88-1.08) | 6.35E-01  | 0.46  | 0                     | 1.00 (0.88-1.13) | 9.28E-01      |  |
| chr11:118611795:D | 118611795 | AG/A      | 0.24 | 0.24    | I/I         | 1.06 (0.88-1.27)                  | 5.58E-01  | 0.97 (0.88-1.08) | 6.35E-01  | 0.46  | 0                     | 1.00 (0.88-1.13) | 9.28E-01      |  |
| rs68097885        | 118596444 | G/A       | 0.23 | 0.23    | I/I         | 1.05 (0.87-1.27)                  | 6.28E-01  | 0.98 (0.88-1.09) | 6.81E-01  | 0.53  | 0                     | 1.00 (0.87-1.14) | 9.28E-01      |  |
| rs10892312        | 118807740 | G/A       | 0.11 | 0.11    | I/I         | 0.77 (0.58-1.02)                  | 6.59E-02  | 1.08 (0.94-1.24) | 2.92E-01  | 0.03  | 78                    | 0.98 (0.82-1.18) | 9.34E-01      |  |
| rs12282154        | 118807876 | G/A       | 0.11 | 0.11    | I/I         | 0.77 (0.58-1.02)                  | 6.59E-02  | 1.08 (0.94-1.24) | 2.92E-01  | 0.03  | 78                    | 0.98 (0.82-1.18) | 9.34E-01      |  |
| rs73001451        | 118614115 | T/C       | 0.05 | 0.04    | I/I         | 0.79 (0.51-1.23)                  | 3.03E-01  | 1.08 (0.88-1.34) | 4.58E-01  | 0.21  | 36                    | 0.99 (0.75-1.31) | 9.35E-01      |  |
| rs7127427         | 118805138 | G/A       | 0.04 | 0.04    | I/I         | 0.86 (0.57-1.30)                  | 4.86E-01  | 1.07 (0.84-1.36) | 6.01E-01  | 0.39  | 0                     | 1.00 (0.75-1.34) | 9.47E-01      |  |
| rs4499035         | 118610463 | C/T       | 0.24 | 0.24    | O/O         | 1.06 (0.88-1.27)                  | 5.68E-01  | 0.98 (0.88-1.08) | 6.63E-01  | 0.48  | 0                     | 1.00 (0.88-1.13) | 9.48E-01      |  |
| rs11217016        | 118627149 | A/C       | 0.24 | 0.24    | I/I         | 1.05 (0.87-1.26)                  | 6.23E-01  | 0.99 (0.89-1.10) | 8.17E-01  | 0.59  | 0                     | 1.00 (0.88-1.14) | 9.48E-01      |  |
| rs11217021        | 118640828 | T/C       | 0.24 | 0.24    | I/I         | 1.06 (0.88-1.27)                  | 5.60E-01  | 0.98 (0.89-1.09) | 7.59E-01  | 0.51  | 0                     | 1.00 (0.88-1.14) | 9.61E-01      |  |
| rs11217013        | 118624919 | G/C       | 0.24 | 0.24    | I/I         | 1.05 (0.87-1.26)                  | 6.24E-01  | 0.98 (0.88-1.09) | 7.18E-01  | 0.54  | 0                     | 1.00 (0.88-1.14) | 9.63E-01      |  |
| rs540716          | 118685015 | C/T       | 0.20 | 0.20    | I/I         | 1.12 (0.92-1.37)                  | 2.72E-01  | 0.96 (0.85-1.08) | 4.66E-01  | 0.19  | 42                    | 1.00 (0.87-1.15) | 9.68E-01      |  |
| rs74678032        | 118812559 | T/C       | 0.02 | 0.02    | I/I         | 1.27 (0.72-2.24)                  | 4.13E-01  | 0.92 (0.63-1.32) | 6.41E-01  | 0.35  | 0                     | 1.00 (0.66-1.54) | 9.68E-01      |  |
| rs7124498         | 118616253 | G/A       | 0.24 | 0.24    | I/I         | 1.05 (0.87-1.27)                  | 5.97E-01  | 0.98 (0.88-1.09) | 7.14E-01  | 0.52  | 0                     | 1.00 (0.88-1.14) | 9.76E-01      |  |
| rs58868870        | 118668296 | C/T       | 0.24 | 0.24    | I/I         | 1.06 (0.88-1.28)                  | 5.65E-01  | 0.98 (0.88-1.09) | 7.45E-01  | 0.51  | 0                     | 1.00 (0.88-1.14) | 9.77E-01      |  |
| rs693614          | 118678036 | G/A       | 0.24 | 0.24    | I/I         | 1.06 (0.88-1.28)                  | 5.30E-01  | 0.98 (0.88-1.09) | 7.19E-01  | 0.47  | 0                     | 1.00 (0.88-1.14) | 9.79E-01      |  |
| rs7117408         | 118808140 | C/T       | 0.11 | 0.11    | I/I         | 0.77 (0.58-1.02)                  | 7.12E-02  | 1.09 (0.94-1.25) | 2.46E-01  | 0.03  | 78                    | 0.99 (0.82-1.18) | 9.81E-01      |  |
| rs11217018        | 118635364 | T/C       | 0.24 | 0.24    | I/I         | 1.05 (0.87-1.27)                  | 5.82E-01  | 0.98 (0.88-1.09) | 7.14E-01  | 0.51  | 0                     | 1.00 (0.88-1.14) | 9.86E-01      |  |
| rs56104144        | 118666289 | G/C       | 0.24 | 0.24    | I/I         | 1.06 (0.88-1.28)                  | 5.43E-01  | 0.98 (0.88-1.09) | 6.94E-01  | 0.47  | 0                     | 1.00 (0.88-1.14) | 9.91E-01      |  |

**Supplementary Table 12.** Association analysis in *TNIP1*

| SNP              | BP        | Alleles   |      | MAF     |             | Observed or Imputed in Dataset1/2 | Dataset 1 |                  | Dataset 2 |                | Test of heterogeneity |                  | Meta analysis |  |
|------------------|-----------|-----------|------|---------|-------------|-----------------------------------|-----------|------------------|-----------|----------------|-----------------------|------------------|---------------|--|
|                  |           | maj / min | Case | Control | OR (95% CI) |                                   | P         | OR (95% CI)      | P         | P <sub>Q</sub> | I <sup>2</sup>        | OR (95% CI)      | P             |  |
|                  |           |           |      |         |             |                                   |           |                  |           |                |                       |                  |               |  |
| rs6579837        | 150434894 | G/T       | 0.12 | 0.09    | I/I         | 1.58 (1.23-2.04)                  | 3.94E-04  | 1.38 (1.19-1.59) | 1.71E-05  | 0.35           | 0                     | 1.43 (1.20-1.71) | 3.30E-08      |  |
| rs2233290        | 150436503 | G/C       | 0.11 | 0.09    | I/I         | 1.60 (1.24-2.07)                  | 2.87E-04  | 1.33 (1.15-1.55) | 1.88E-04  | 0.22           | 34                    | 1.40 (1.17-1.68) | 3.57E-07      |  |
| rs2042234        | 150439131 | A/G       | 0.11 | 0.09    | I/I         | 1.59 (1.23-2.05)                  | 3.83E-04  | 1.33 (1.15-1.55) | 1.69E-04  | 0.25           | 26                    | 1.40 (1.17-1.67) | 3.92E-07      |  |
| rs2001542        | 150432859 | C/T       | 0.12 | 0.09    | I/I         | 1.62 (1.25-2.09)                  | 2.12E-04  | 1.32 (1.14-1.53) | 2.95E-04  | 0.18           | 46                    | 1.40 (1.17-1.67) | 4.81E-07      |  |
| rs7732451        | 150444212 | A/G       | 0.15 | 0.12    | O/O         | 1.36 (1.09-1.71)                  | 6.77E-03  | 1.33 (1.17-1.52) | 2.43E-05  | 0.86           | 0                     | 1.34 (1.14-1.57) | 5.32E-07      |  |
| rs13180950       | 150452553 | T/C       | 0.19 | 0.15    | I/I         | 1.40 (1.13-1.72)                  | 1.65E-03  | 1.27 (1.13-1.44) | 8.24E-05  | 0.45           | 0                     | 1.31 (1.13-1.51) | 5.52E-07      |  |
| rs6861227        | 150447128 | T/G       | 0.17 | 0.14    | I/I         | 1.38 (1.11-1.72)                  | 3.45E-03  | 1.29 (1.14-1.46) | 7.93E-05  | 0.58           | 0                     | 1.31 (1.13-1.53) | 9.75E-07      |  |
| rs17111708       | 150443507 | G/A       | 0.12 | 0.09    | I/I         | 1.57 (1.22-2.02)                  | 5.52E-04  | 1.31 (1.13-1.52) | 3.22E-04  | 0.24           | 27                    | 1.38 (1.15-1.65) | 1.05E-06      |  |
| rs2233287        | 150440097 | G/A       | 0.11 | 0.09    | O/O         | 1.58 (1.23-2.04)                  | 3.93E-04  | 1.31 (1.13-1.52) | 4.18E-04  | 0.21           | 36                    | 1.38 (1.15-1.65) | 1.10E-06      |  |
| rs59926079       | 150447743 | A/G       | 0.11 | 0.09    | I/I         | 1.56 (1.21-2.02)                  | 6.31E-04  | 1.31 (1.13-1.52) | 3.93E-04  | 0.24           | 27                    | 1.38 (1.15-1.65) | 1.45E-06      |  |
| rs58474444       | 150447880 | T/G       | 0.11 | 0.09    | I/I         | 1.56 (1.21-2.01)                  | 6.88E-04  | 1.31 (1.13-1.52) | 3.99E-04  | 0.25           | 24                    | 1.38 (1.15-1.65) | 1.56E-06      |  |
| rs13160369       | 150452196 | C/G       | 0.18 | 0.15    | I/I         | 1.33 (1.08-1.65)                  | 8.33E-03  | 1.28 (1.14-1.45) | 6.49E-05  | 0.76           | 0                     | 1.29 (1.12-1.50) | 1.71E-06      |  |
| rs3792783        | 150455732 | A/G       | 0.18 | 0.15    | O/I         | 1.39 (1.13-1.71)                  | 1.91E-03  | 1.26 (1.11-1.42) | 2.19E-04  | 0.41           | 0                     | 1.29 (1.12-1.49) | 1.74E-06      |  |
| rs6880110        | 150447090 | A/G       | 0.17 | 0.14    | I/I         | 1.38 (1.11-1.72)                  | 3.79E-03  | 1.28 (1.13-1.45) | 1.32E-04  | 0.55           | 0                     | 1.31 (1.12-1.52) | 1.78E-06      |  |
| rs73272828       | 150449220 | C/T       | 0.12 | 0.09    | I/I         | 1.52 (1.17-1.96)                  | 1.42E-03  | 1.31 (1.13-1.52) | 3.35E-04  | 0.33           | 0                     | 1.37 (1.14-1.63) | 2.20E-06      |  |
| rs3792784        | 150455672 | A/G       | 0.13 | 0.10    | I/I         | 1.53 (1.20-1.94)                  | 5.69E-04  | 1.27 (1.11-1.47) | 6.67E-04  | 0.20           | 38                    | 1.34 (1.13-1.59) | 2.44E-06      |  |
| rs73272841       | 150453384 | C/T       | 0.13 | 0.10    | I/I         | 1.50 (1.18-1.90)                  | 9.54E-04  | 1.28 (1.11-1.47) | 5.91E-04  | 0.26           | 22                    | 1.34 (1.13-1.58) | 3.07E-06      |  |
| rs1559127        | 150446753 | T/C       | 0.14 | 0.11    | I/I         | 1.52 (1.20-1.94)                  | 6.30E-04  | 1.26 (1.10-1.45) | 9.76E-04  | 0.18           | 43                    | 1.33 (1.13-1.57) | 4.03E-06      |  |
| rs4958880        | 150438477 | C/A       | 0.23 | 0.19    | I/I         | 1.23 (1.01-1.48)                  | 3.74E-02  | 1.26 (1.13-1.41) | 3.88E-05  | 0.80           | 0                     | 1.25 (1.09-1.43) | 4.39E-06      |  |
| rs75805068       | 150451075 | A/T       | 0.12 | 0.09    | I/I         | 1.53 (1.20-1.95)                  | 6.85E-04  | 1.28 (1.10-1.49) | 1.15E-03  | 0.23           | 30                    | 1.35 (1.13-1.61) | 5.10E-06      |  |
| rs1107239        | 150454606 | T/A       | 0.13 | 0.10    | I/I         | 1.50 (1.18-1.92)                  | 9.87E-04  | 1.26 (1.10-1.46) | 9.99E-04  | 0.23           | 32                    | 1.33 (1.12-1.57) | 5.71E-06      |  |
| rs4958881        | 150450236 | T/C       | 0.14 | 0.11    | O/O         | 1.50 (1.18-1.90)                  | 8.88E-04  | 1.25 (1.09-1.43) | 1.32E-03  | 0.20           | 40                    | 1.32 (1.12-1.55) | 7.20E-06      |  |
| rs3792785        | 150451650 | T/C       | 0.13 | 0.10    | O/O         | 1.49 (1.17-1.89)                  | 1.11E-03  | 1.26 (1.09-1.45) | 1.36E-03  | 0.23           | 30                    | 1.32 (1.11-1.56) | 8.70E-06      |  |
| rs10057690       | 150445215 | T/C       | 0.11 | 0.09    | I/I         | 1.52 (1.18-1.97)                  | 1.27E-03  | 1.27 (1.10-1.48) | 1.49E-03  | 0.24           | 28                    | 1.34 (1.12-1.61) | 1.07E-05      |  |
| chr5:150451347:I | 150451347 | C/CCT     | 0.15 | 0.13    | I/I         | 1.47 (1.17-1.84)                  | 8.17E-04  | 1.23 (1.08-1.40) | 2.08E-03  | 0.17           | 47                    | 1.29 (1.10-1.51) | 1.15E-05      |  |
| chr5:150456053:D | 150456053 | CAG/C     | 0.15 | 0.12    | I/I         | 1.50 (1.20-1.89)                  | 4.23E-04  | 1.22 (1.07-1.39) | 3.12E-03  | 0.12           | 60                    | 1.29 (1.10-1.51) | 1.20E-05      |  |
| rs4958882        | 150454787 | C/G       | 0.15 | 0.12    | I/I         | 1.49 (1.19-1.87)                  | 5.60E-04  | 1.22 (1.07-1.39) | 3.18E-03  | 0.13           | 57                    | 1.29 (1.10-1.51) | 1.48E-05      |  |
| rs73272842       | 150453888 | G/A       | 0.15 | 0.12    | I/I         | 1.48 (1.18-1.86)                  | 7.03E-04  | 1.22 (1.07-1.39) | 2.97E-03  | 0.14           | 54                    | 1.29 (1.10-1.51) | 1.58E-05      |  |
| rs6869605        | 150452866 | A/C       | 0.15 | 0.12    | O/O         | 1.45 (1.15-1.82)                  | 1.72E-03  | 1.23 (1.08-1.40) | 2.12E-03  | 0.22           | 33                    | 1.28 (1.10-1.50) | 1.97E-05      |  |
| rs4958436        | 150442829 | T/C       | 0.24 | 0.21    | I/I         | 1.19 (0.99-1.44)                  | 6.79E-02  | 1.23 (1.10-1.37) | 2.66E-04  | 0.81           | 0                     | 1.22 (1.07-1.39) | 4.93E-05      |  |
| rs10036748       | 150458146 | C/T       | 0.28 | 0.25    | O/O         | 1.24 (1.04-1.48)                  | 1.82E-02  | 1.18 (1.07-1.31) | 1.40E-03  | 0.65           | 0                     | 1.20 (1.06-1.36) | 7.44E-05      |  |
| rs6889239        | 150457771 | T/C       | 0.28 | 0.25    | I/I         | 1.24 (1.04-1.49)                  | 1.67E-02  | 1.18 (1.06-1.30) | 1.74E-03  | 0.60           | 0                     | 1.20 (1.06-1.35) | 8.70E-05      |  |
| rs2233294        | 150429563 | A/C       | 0.23 | 0.21    | I/I         | 1.32 (1.09-1.60)                  | 4.59E-03  | 1.17 (1.05-1.31) | 4.36E-03  | 0.30           | 7                     | 1.21 (1.06-1.38) | 8.90E-05      |  |
| rs7708392        | 150457485 | G/C       | 0.28 | 0.25    | I/I         | 1.24 (1.04-1.49)                  | 1.73E-02  | 1.18 (1.06-1.30) | 1.85E-03  | 0.61           | 0                     | 1.20 (1.06-1.35) | 9.51E-05      |  |
| rs7719549        | 150460047 | C/T       | 0.12 | 0.10    | I/I         | 1.41 (1.11-1.80)                  | 5.45E-03  | 1.23 (1.07-1.43) | 4.69E-03  | 0.35           | 0                     | 1.28 (1.08-1.52) | 1.07E-04      |  |
| rs960709         | 150461049 | A/G       | 0.29 | 0.25    | O/O         | 1.22 (1.02-1.46)                  | 2.60E-02  | 1.18 (1.06-1.30) | 1.62E-03  | 0.71           | 0                     | 1.19 (1.05-1.35) | 1.17E-04      |  |
| rs13153275       | 150428399 | C/G       | 0.29 | 0.26    | I/I         | 1.32 (1.11-1.58)                  | 2.15E-03  | 1.13 (1.02-1.25) | 2.09E-02  | 0.13           | 56                    | 1.18 (1.04-1.34) | 3.33E-04      |  |
| rs8177431        | 150403996 | A/G       | 0.35 | 0.37    | I/I         | 0.89 (0.75-1.06)                  | 1.96E-01  | 0.87 (0.79-0.96) | 4.77E-03  | 0.80           | 0                     | 0.88 (0.78-0.99) | 2.09E-03      |  |
| rs4958874        | 150405395 | C/T       | 0.35 | 0.38    | I/I         | 0.88 (0.74-1.04)                  | 1.28E-01  | 0.89 (0.81-0.98) | 1.54E-02  | 0.89           | 0                     | 0.89 (0.79-1.00) | 4.23E-03      |  |
| rs3792796        | 150402490 | C/G       | 0.36 | 0.38    | I/I         | 0.88 (0.74-1.04)                  | 1.42E-01  | 0.89 (0.81-0.98) | 1.60E-02  | 0.92           | 0                     | 0.89 (0.79-1.00) | 4.79E-03      |  |
| rs10463312       | 150410894 | C/T       | 0.36 | 0.38    | I/I         | 0.89 (0.75-1.05)                  | 1.65E-01  | 0.89 (0.81-0.98) | 1.42E-02  | 0.99           | 0                     | 0.89 (0.79-1.00) | 4.87E-03      |  |
| rs1862364        | 150448376 | A/G       | 0.15 | 0.13    | I/I         | 1.39 (1.12-1.73)                  | 2.62E-03  | 1.10 (0.96-1.25) | 1.71E-01  | 0.06           | 71                    | 1.17 (1.00-1.37) | 5.82E-03      |  |
| rs3763010        | 150408711 | T/C       | 0.36 | 0.38    | I/I         | 0.89 (0.75-1.05)                  | 1.62E-01  | 0.89 (0.81-0.98) | 2.00E-02  | 0.94           | 0                     | 0.89 (0.79-1.00) | 6.65E-03      |  |
| rs736775         | 150409348 | C/T       | 0.36 | 0.38    | I/I         | 0.88 (0.74-1.04)                  | 1.35E-01  | 0.90 (0.82-0.99) | 2.68E-02  | 0.82           | 0                     | 0.89 (0.80-1.00) | 7.58E-03      |  |
| rs2112635        | 150432153 | T/C       | 0.35 | 0.33    | O/O         | 1.24 (1.05-1.47)                  | 1.23E-02  | 1.08 (0.98-1.19) | 1.26E-01  | 0.15           | 51                    | 1.12 (1.00-1.26) | 8.58E-03      |  |
| rs8177427        | 150403011 | G/A       | 0.16 | 0.17    | I/I         | 0.77 (0.61-0.96)                  | 2.10E-02  | 0.91 (0.80-1.03) | 1.36E-01  | 0.19           | 41                    | 0.87 (0.74-1.01) | 1.27E-02      |  |
| rs150973658      | 150463768 | G/A       | 0.15 | 0.14    | I/I         | 1.18 (0.94-1.48)                  | 1.43E-01  | 1.14 (1.00-1.29) | 5.05E-02  | 0.76           | 0                     | 1.15 (0.98-1.35) | 1.49E-02      |  |
| rs3792797        | 150401891 | C/A       | 0.16 | 0.18    | I/I         | 0.75 (0.60-0.94)                  | 1.12E-02  | 0.92 (0.82-1.04) | 2.04E-01  | 0.11           | 62                    | 0.87 (0.75-1.01) | 1.54E-02      |  |
| rs3828599        | 150401796 | G/A       | 0.24 | 0.26    | O/O         | 0.76 (0.62-0.92)                  | 5.03E-03  | 0.94 (0.85-1.05) | 2.93E-01  | 0.05           | 74                    | 0.89 (0.78-1.01) | 1.72E-02      |  |
| rs3924           | 150410135 | A/G       | 0.36 | 0.38    | I/I         | 0.88 (0.75-1.05)                  | 1.57E-01  | 0.91 (0.83-1.00) | 5.48E-02  | 0.77           | 0                     | 0.90 (0.80-1.01) | 1.74E-02      |  |
| rs35898062       | 150443650 | C/T       | 0.04 | 0.03    | I/I         | 1.01 (0.64-1.58)                  | 9.68E-01  | 1.42 (1.11-1.83) | 5.98E-03  | 0.19           | 41                    | 1.29 (0.95-1.75) | 1.88E-02      |  |
| rs8177426        | 150402940 | G/A       | 0.16 | 0.18    | O/O         | 0.74 (0.60-0.93)                  | 9.49E-03  | 0.93 (0.83-1.05) | 2.55E-01  | 0.08           | 67                    | 0.87 (0.75-1.02) | 1.91E-02      |  |
| rs4958873        | 150404096 | G/A       | 0.16 | 0.17    | O/O         | 0.77 (0.61-0.96)                  | 2.10E-02  | 0.92 (0.81-1.04) | 1.90E-01  | 0.16           | 49                    | 0.87 (0.75-1.02) | 1.94E-02      |  |
| rs4958434        | 150402570 | G/A       | 0.16 | 0.17    | O/O         | 0.77 (0.62-0.96)                  | 2.30E-02  | 0.92 (0.81-1.04) | 1.90E-01  | 0.17           | 46                    | 0.88 (0.75-1.02) | 2.04E-02      |  |
| rs77102485       | 150474712 | G/C       | 0.14 | 0.13    | I/I         | 1.15 (0.91-1.44)                  | 2.34E-01  | 1.14 (1.00-1.30) | 4.69E-02  | 0.96           | 0                     | 1.14 (0.98-1.34) | 2.06E-02      |  |
| rs4958889        | 150473584 | C/T       | 0.14 | 0.13    | O/O         | 1.16 (0.92-1.45)                  | 2.02E-01  | 1.14 (1.00-1.29) | 5.47E-02  | 0.89           | 0                     | 1.14 (0.98-1.34) | 2.11E-02      |  |
| rs10057917       | 150445646 | T/C       | 0.04 | 0.03    | I/I         | 1.03 (0.66-1.59)                  | 9.98E-01  | 1.40 (1.09-1.80) | 8.25E-03  | 0.23           | 31                    | 1.28 (0.95-1.74) | 2.11E-02      |  |
| rs78053854       | 150466054 | G/A       | 0.15 | 0.14    | I/I         | 1.21 (0.97-1.51)                  | 9.70E-02  | 1.12 (0.98-1.27) | 9.37E-02  | 0.55           | 0                     | 1.14 (0.98-1.33) | 2.13E-02      |  |
| rs4292439        | 150428195 | T/C       | 0.17 | 0.18    | O/O         | 0.76 (0.61-0.95)                  | 1.50E-02  | 0.93 (0.82-1.05) | 2.34E-01  | 0.12           | 59                    | 0.88 (0.76-1.02) | 2.14E-02      |  |
| chr5:150436158:D | 150436158 | CA/C      | 0.23 | 0.25    | I/I         | 0.90 (0.74-1.09)                  | 2.78E-01  | 0.89 (0.80-1.00) | 4.43E-02  | 0.97           | 0                     | 0.90 (0.78-1.02) | 2.26E-02      |  |
| rs3805433        | 150435480 | C/G       | 0.25 | 0.27    | I/I         | 0.93 (0.77-1.12)                  | 4.16E-01  | 0.89 (0.80-0.99) | 3.08E-02  | 0.72           | 0                     | 0.90 (0.79-1.02) | 2.37E-02      |  |
| rs138789533      | 150467540 | G/A       | 0.15 | 0.14    | I/I         | 1.22 (0.98-1.51)                  | 8.23E-02  | 1.11 (0.98-1.26) | 1.14E-01  | 0.48           | 0                     | 1.14 (0.98-1.33) | 2.37E-02      |  |
| rs8177447        | 150407456 | C/T       | 0.16 | 0.17    | O/O         | 0.76 (0.61-0.95)                  | 1.76E-02  | 0.93 (0.82-1.05) | 2.50E-01  | 0.13           | 57                    | 0.88 (0.76-1.02) | 2.53E-02      |  |
| rs7727250        | 150415651 | T/C       | 0.16 | 0.17    | I/I         | 0.77 (0.62-0.97)                  | 2.51E-02  | 0.93 (0.82-1.05) | 2.32E-01  | 0.17           | 48                    | 0.88 (0.76-1.03) | 2.77E-02      |  |
| rs4958879        | 150434422 | A/G       | 0.49 | 0.47    | I/I         | 1.09 (0.93-1.29)                  | 2.77E-01  | 1.09 (1.00-1.20) | 5.83E-02  | 0.99           | 0                     | 1.09 (0.98-1.22) | 2.91E-02      |  |
| rs52817781       | 150436422 | C/T       | 0.04 | 0.03    | I/I         | 1.00 (0.63-1.59)                  | 9.85E-01  | 1.40 (1.08-1.80) | 1.15E-02  | 0.22           | 33                    | 1.27 (0.93-1.74) | 3.14E-02      |  |
| rs75970310       | 150468123 | T/C       | 0.15 | 0.14    | I/I         | 1.20 (0.97-1.50)                  | 9.72E-02  | 1.10 (0.97-1.25) | 1.37E-01  | 0.49           | 0                     | 1.13 (0.97-1.32) | 3.24E-02      |  |
| rs10463311       | 150410835 | T/C       | 0.24 | 0.26    | I/I         | 0.76 (0.63-0.93)                  | 6.55E-03  | 0.96 (0.86-1.06) | 4.20E-01  | 0.05           | 75                    | 0.90 (0.79-1.02) | 3.34E-02      |  |
| rs6895271        | 150434421 | C/T       | 0.23 | 0.25    | I/I         | 0.92 (0.75-1.11)                  | 3.78E-01  | 0.90 (0.80-1.00) | 5.35E-02  | 0.86           | 0                     | 0.90 (0.79-1.03) | 3.53E-02      |  |

**Supplementary Table 12.** Association analysis in *TNIP1*

| SNP              | BP        | Alleles   |      | MAF     |             | Observed or Imputed in Dataset1/2 | Dataset 1 |                  | Dataset 2 |                | Test of heterogeneity |                  | Meta analysis |  |
|------------------|-----------|-----------|------|---------|-------------|-----------------------------------|-----------|------------------|-----------|----------------|-----------------------|------------------|---------------|--|
|                  |           | maj / min | Case | Control | OR (95% CI) |                                   | P         | OR (95% CI)      | P         | P <sub>Q</sub> | I <sup>2</sup>        | OR (95% CI)      | P             |  |
|                  |           |           |      |         |             |                                   |           |                  |           |                |                       |                  |               |  |
| rs79183735       | 150470472 | G/T       | 0.15 | 0.14    | I/I         | 1.20 (0.96-1.49)                  | 1.05E-01  | 1.10 (0.97-1.25) | 1.46E-01  | 0.50           | 0                     | 1.13 (0.97-1.31) | 3.63E-02      |  |
| rs35932632       | 150444309 | G/A       | 0.04 | 0.03    | I/I         | 1.02 (0.65-1.61)                  | 9.22E-01  | 1.37 (1.06-1.76) | 1.62E-02  | 0.27           | 17                    | 1.26 (0.92-1.72) | 3.66E-02      |  |
| rs12110030       | 150448647 | C/G       | 0.04 | 0.03    | I/I         | 0.93 (0.60-1.46)                  | 7.64E-01  | 1.40 (1.08-1.80) | 9.76E-03  | 0.12           | 58                    | 1.25 (0.92-1.70) | 4.24E-02      |  |
| rs7727034        | 150415477 | G/C       | 0.24 | 0.26    | I/I         | 0.77 (0.64-0.94)                  | 8.75E-03  | 0.96 (0.86-1.07) | 4.58E-01  | 0.05           | 74                    | 0.90 (0.79-1.03) | 4.32E-02      |  |
| rs35736924       | 150449945 | T/C       | 0.04 | 0.03    | I/I         | 0.98 (0.62-1.54)                  | 9.15E-01  | 1.37 (1.06-1.77) | 1.50E-02  | 0.20           | 39                    | 1.25 (0.91-1.70) | 4.50E-02      |  |
| rs13162693       | 150440447 | C/T       | 0.04 | 0.03    | I/I         | 0.97 (0.61-1.53)                  | 8.99E-01  | 1.37 (1.06-1.77) | 1.48E-02  | 0.19           | 41                    | 1.25 (0.91-1.70) | 4.57E-02      |  |
| rs11747926       | 150414388 | G/A       | 0.15 | 0.17    | I/I         | 0.80 (0.64-1.00)                  | 4.99E-02  | 0.93 (0.82-1.05) | 2.63E-01  | 0.24           | 27                    | 0.89 (0.76-1.04) | 4.65E-02      |  |
| rs12109187       | 150448861 | A/C       | 0.04 | 0.03    | O/O         | 0.98 (0.63-1.51)                  | 9.15E-01  | 1.35 (1.05-1.74) | 1.72E-02  | 0.20           | 39                    | 1.23 (0.91-1.67) | 4.99E-02      |  |
| rs71586194       | 150433351 | G/A       | 0.03 | 0.03    | I/I         | 1.01 (0.64-1.61)                  | 9.50E-01  | 1.35 (1.04-1.75) | 2.42E-02  | 0.29           | 10                    | 1.24 (0.91-1.71) | 5.20E-02      |  |
| rs78405841       | 150435255 | G/C       | 0.04 | 0.03    | I/I         | 1.00 (0.63-1.59)                  | 9.88E-01  | 1.34 (1.04-1.73) | 2.29E-02  | 0.28           | 15                    | 1.24 (0.91-1.69) | 5.29E-02      |  |
| rs34063173       | 150448404 | A/G       | 0.04 | 0.03    | I/I         | 0.98 (0.63-1.54)                  | 9.38E-01  | 1.35 (1.05-1.74) | 2.03E-02  | 0.23           | 31                    | 1.23 (0.91-1.68) | 5.42E-02      |  |
| chr5:150448368:D | 150448368 | ATCT/A    | 0.04 | 0.03    | I/I         | 0.95 (0.60-1.48)                  | 8.07E-01  | 1.37 (1.06-1.77) | 1.61E-02  | 0.16           | 50                    | 1.24 (0.90-1.69) | 5.62E-02      |  |
| rs3792786        | 150446838 | T/C       | 0.04 | 0.03    | I/I         | 0.98 (0.63-1.54)                  | 9.46E-01  | 1.35 (1.04-1.74) | 2.26E-02  | 0.24           | 29                    | 1.23 (0.90-1.68) | 5.80E-02      |  |
| rs13182162       | 150456367 | C/T       | 0.04 | 0.03    | I/I         | 0.98 (0.63-1.54)                  | 9.34E-01  | 1.34 (1.04-1.73) | 2.59E-02  | 0.24           | 28                    | 1.23 (0.90-1.67) | 6.53E-02      |  |
| rs17111727       | 150455442 | A/G       | 0.06 | 0.05    | I/I         | 1.08 (0.74-1.56)                  | 6.90E-01  | 1.20 (0.99-1.46) | 6.90E-02  | 0.61           | 0                     | 1.17 (0.91-1.49) | 7.95E-02      |  |
| rs35589164       | 150445677 | T/C       | 0.03 | 0.03    | I/I         | 1.03 (0.66-1.62)                  | 8.86E-01  | 1.30 (1.00-1.68) | 4.95E-02  | 0.39           | 0                     | 1.22 (0.89-1.66) | 8.17E-02      |  |
| rs35325406       | 150432973 | G/C       | 0.03 | 0.03    | I/I         | 0.99 (0.62-1.58)                  | 9.65E-01  | 1.32 (1.02-1.72) | 3.78E-02  | 0.29           | 11                    | 1.22 (0.88-1.68) | 8.23E-02      |  |
| rs34038142       | 150434308 | C/A       | 0.03 | 0.03    | I/I         | 1.00 (0.63-1.59)                  | 9.85E-01  | 1.30 (1.00-1.68) | 4.56E-02  | 0.34           | 0                     | 1.21 (0.88-1.66) | 8.84E-02      |  |
| rs17111695       | 150432446 | T/C       | 0.16 | 0.18    | O/O         | 1.00 (0.81-1.24)                  | 9.71E-01  | 0.88 (0.78-1.00) | 4.50E-02  | 0.30           | 9                     | 0.91 (0.79-1.06) | 9.33E-02      |  |
| rs4958878        | 150428584 | T/A       | 0.10 | 0.11    | I/I         | 0.85 (0.65-1.11)                  | 2.29E-01  | 0.91 (0.79-1.06) | 2.33E-01  | 0.64           | 0                     | 0.89 (0.74-1.07) | 9.89E-02      |  |
| rs4958435        | 150438284 | G/T       | 0.48 | 0.47    | O/O         | 1.09 (0.93-1.28)                  | 3.06E-01  | 1.06 (0.97-1.17) | 2.01E-01  | 0.80           | 0                     | 1.07 (0.96-1.20) | 1.04E-01      |  |
| rs9324672        | 150420056 | C/A       | 0.11 | 0.12    | O/O         | 1.15 (0.89-1.49)                  | 2.82E-01  | 0.83 (0.71-0.95) | 9.61E-03  | 0.03           | 80                    | 0.91 (0.76-1.08) | 1.05E-01      |  |
| rs4958891        | 150477137 | T/C       | 0.22 | 0.21    | O/O         | 1.03 (0.84-1.25)                  | 8.00E-01  | 1.10 (0.99-1.23) | 7.99E-02  | 0.53           | 0                     | 1.08 (0.94-1.24) | 1.06E-01      |  |
| rs3763002        | 150467539 | T/C       | 0.46 | 0.45    | I/I         | 1.12 (0.96-1.32)                  | 1.50E-01  | 1.05 (0.96-1.15) | 3.27E-01  | 0.45           | 0                     | 1.07 (0.96-1.19) | 1.11E-01      |  |
| rs11747116       | 150427285 | T/C       | 0.46 | 0.45    | O/I         | 1.20 (1.02-1.41)                  | 2.93E-02  | 1.02 (0.93-1.12) | 6.09E-01  | 0.10           | 63                    | 1.07 (0.96-1.20) | 1.11E-01      |  |
| rs223277         | 150467329 | T/C       | 0.46 | 0.45    | O/I         | 1.13 (0.96-1.32)                  | 1.44E-01  | 1.05 (0.95-1.15) | 3.37E-01  | 0.43           | 0                     | 1.07 (0.96-1.19) | 1.12E-01      |  |
| rs2287725        | 150466504 | A/G       | 0.46 | 0.45    | I/I         | 1.13 (0.96-1.32)                  | 1.34E-01  | 1.04 (0.95-1.15) | 3.49E-01  | 0.41           | 0                     | 1.07 (0.96-1.19) | 1.12E-01      |  |
| rs10051105       | 150423459 | A/G       | 0.06 | 0.06    | O/O         | 0.64 (0.44-0.92)                  | 1.75E-02  | 0.96 (0.80-1.17) | 7.08E-01  | 0.05           | 74                    | 0.86 (0.67-1.09) | 1.14E-01      |  |
| rs7713223        | 150430696 | T/C       | 0.12 | 0.13    | O/O         | 1.06 (0.83-1.36)                  | 6.37E-01  | 0.87 (0.75-0.99) | 3.74E-02  | 0.15           | 51                    | 0.92 (0.78-1.08) | 1.31E-01      |  |
| rs4958876        | 150422765 | C/A       | 0.11 | 0.12    | O/O         | 0.87 (0.68-1.12)                  | 2.87E-01  | 0.92 (0.80-1.06) | 2.65E-01  | 0.70           | 0                     | 0.91 (0.76-1.08) | 1.31E-01      |  |
| rs999011         | 150479351 | C/T       | 0.12 | 0.13    | O/O         | 1.08 (0.85-1.37)                  | 5.24E-01  | 0.85 (0.74-0.98) | 2.91E-02  | 0.09           | 65                    | 0.91 (0.77-1.08) | 1.31E-01      |  |
| rs223297         | 150429240 | T/C       | 0.06 | 0.06    | I/I         | 0.68 (0.46-0.99)                  | 4.61E-02  | 0.95 (0.79-1.15) | 6.10E-01  | 0.12           | 58                    | 0.87 (0.68-1.10) | 1.36E-01      |  |
| rs8177441        | 150405994 | G/C       | 0.19 | 0.20    | I/I         | 1.08 (0.88-1.33)                  | 4.55E-01  | 0.88 (0.78-0.99) | 2.73E-02  | 0.08           | 67                    | 0.93 (0.81-1.07) | 1.41E-01      |  |
| rs8177442        | 150405995 | A/T       | 0.19 | 0.20    | I/I         | 1.08 (0.88-1.33)                  | 4.55E-01  | 0.88 (0.78-0.99) | 2.73E-02  | 0.08           | 67                    | 0.93 (0.81-1.07) | 1.41E-01      |  |
| rs60646696       | 150432657 | T/C       | 0.08 | 0.07    | I/I         | 1.05 (0.78-1.42)                  | 7.58E-01  | 1.14 (0.96-1.34) | 1.32E-01  | 0.64           | 0                     | 1.11 (0.91-1.36) | 1.50E-01      |  |
| rs10071465       | 150471377 | A/G       | 0.48 | 0.50    | O/O         | 0.86 (0.74-1.01)                  | 7.35E-02  | 0.97 (0.89-1.07) | 5.84E-01  | 0.20           | 39                    | 0.94 (0.84-1.05) | 1.57E-01      |  |
| rs11748040       | 150414945 | G/A       | 0.10 | 0.11    | I/I         | 0.85 (0.65-1.11)                  | 2.28E-01  | 0.93 (0.80-1.08) | 3.73E-01  | 0.54           | 0                     | 0.91 (0.76-1.09) | 1.63E-01      |  |
| rs4958877        | 150423571 | G/A       | 0.12 | 0.12    | I/O         | 0.86 (0.66-1.10)                  | 2.30E-01  | 0.94 (0.81-1.08) | 3.73E-01  | 0.54           | 0                     | 0.91 (0.77-1.09) | 1.64E-01      |  |
| rs71586196       | 150464590 | C/A       | 0.04 | 0.04    | O/O         | 1.09 (0.73-1.62)                  | 6.77E-01  | 1.17 (0.93-1.47) | 1.70E-01  | 0.76           | 0                     | 1.15 (0.87-1.51) | 1.66E-01      |  |
| chr5:150427966:l | 150427966 | AT/A      | 0.11 | 0.12    | I/I         | 0.87 (0.68-1.13)                  | 3.00E-01  | 0.93 (0.81-1.07) | 3.27E-01  | 0.67           | 0                     | 0.91 (0.77-1.09) | 1.67E-01      |  |
| rs2346024        | 150464235 | C/G       | 0.49 | 0.50    | I/I         | 0.87 (0.74-1.01)                  | 7.65E-02  | 0.98 (0.89-1.07) | 6.13E-01  | 0.20           | 39                    | 0.94 (0.84-1.05) | 1.70E-01      |  |
| rs141122558      | 150412600 | T/C       | 0.05 | 0.06    | I/I         | 0.68 (0.47-1.00)                  | 5.32E-02  | 0.96 (0.79-1.17) | 6.84E-01  | 0.12           | 58                    | 0.87 (0.68-1.12) | 1.70E-01      |  |
| rs3792790        | 150442171 | C/A       | 0.48 | 0.46    | I/I         | 1.06 (0.90-1.25)                  | 4.86E-01  | 1.06 (0.96-1.16) | 2.42E-01  | 0.98           | 0                     | 1.06 (0.95-1.18) | 1.73E-01      |  |
| rs13160766       | 150424837 | G/C       | 0.11 | 0.12    | I/I         | 0.87 (0.67-1.12)                  | 2.68E-01  | 0.94 (0.81-1.08) | 3.68E-01  | 0.60           | 0                     | 0.92 (0.77-1.09) | 1.77E-01      |  |
| rs8177425        | 150402873 | C/T       | 0.02 | 0.02    | O/O         | 1.14 (0.66-1.94)                  | 6.41E-01  | 0.74 (0.54-1.02) | 6.24E-02  | 0.18           | 46                    | 0.83 (0.57-1.22) | 1.83E-01      |  |
| rs149507718      | 150413812 | A/G       | 0.05 | 0.06    | I/I         | 0.68 (0.46-1.01)                  | 5.58E-02  | 0.97 (0.80-1.18) | 7.39E-01  | 0.12           | 59                    | 0.88 (0.68-1.13) | 1.95E-01      |  |
| rs146571698      | 150471878 | C/T       | 0.06 | 0.06    | I/I         | 1.18 (0.82-1.70)                  | 3.67E-01  | 1.10 (0.91-1.33) | 3.35E-01  | 0.73           | 0                     | 1.12 (0.88-1.43) | 1.95E-01      |  |
| rs72790109       | 150418221 | G/A       | 0.11 | 0.12    | I/I         | 1.24 (0.96-1.60)                  | 1.01E-01  | 0.83 (0.72-0.96) | 1.06E-02  | 0.01           | 86                    | 0.93 (0.78-1.11) | 1.95E-01      |  |
| rs76462670       | 150478223 | G/A       | 0.06 | 0.06    | I/I         | 1.23 (0.86-1.77)                  | 2.56E-01  | 1.08 (0.89-1.31) | 4.24E-01  | 0.53           | 0                     | 1.12 (0.88-1.43) | 2.00E-01      |  |
| rs7713028        | 150430421 | G/A       | 0.05 | 0.05    | I/I         | 0.75 (0.50-1.12)                  | 1.55E-01  | 0.94 (0.76-1.15) | 5.46E-01  | 0.33           | 0                     | 0.88 (0.68-1.14) | 2.05E-01      |  |
| rs10463314       | 150463879 | G/A       | 0.25 | 0.26    | I/I         | 1.01 (0.84-1.22)                  | 8.77E-01  | 0.92 (0.82-1.02) | 1.10E-01  | 0.34           | 0                     | 0.94 (0.83-1.07) | 2.06E-01      |  |
| rs79901336       | 150476675 | G/T       | 0.06 | 0.06    | I/I         | 1.21 (0.84-1.74)                  | 3.16E-01  | 1.09 (0.89-1.32) | 4.01E-01  | 0.62           | 0                     | 1.12 (0.88-1.43) | 2.13E-01      |  |
| rs2233311        | 150410219 | C/A       | 0.11 | 0.12    | O/O         | 1.23 (0.96-1.59)                  | 1.07E-01  | 0.83 (0.72-0.96) | 1.34E-02  | 0.01           | 85                    | 0.93 (0.78-1.11) | 2.16E-01      |  |
| chr5:150472305:D | 150472305 | AC/A      | 0.04 | 0.04    | I/I         | 1.12 (0.75-1.68)                  | 5.69E-01  | 1.14 (0.90-1.44) | 2.69E-01  | 0.96           | 0                     | 1.13 (0.86-1.50) | 2.16E-01      |  |
| rs72790117       | 150428746 | G/A       | 0.11 | 0.12    | I/I         | 1.23 (0.95-1.59)                  | 1.17E-01  | 0.84 (0.72-0.97) | 1.54E-02  | 0.01           | 85                    | 0.93 (0.78-1.11) | 2.22E-01      |  |
| rs74817271       | 150469973 | G/A       | 0.06 | 0.06    | I/I         | 1.14 (0.79-1.64)                  | 4.90E-01  | 1.10 (0.91-1.34) | 3.13E-01  | 0.89           | 0                     | 1.11 (0.87-1.42) | 2.22E-01      |  |
| rs35916756       | 150470583 | G/A       | 0.04 | 0.04    | O/O         | 1.08 (0.72-1.61)                  | 7.10E-01  | 1.15 (0.92-1.43) | 2.36E-01  | 0.80           | 0                     | 1.13 (0.86-1.48) | 2.30E-01      |  |
| rs2070593        | 150407940 | G/A       | 0.19 | 0.20    | O/O         | 1.09 (0.89-1.34)                  | 3.88E-01  | 0.89 (0.79-1.00) | 5.28E-02  | 0.09           | 66                    | 0.95 (0.82-1.09) | 2.37E-01      |  |
| rs8177412        | 150400087 | T/C       | 0.12 | 0.13    | O/O         | 1.13 (0.88-1.44)                  | 3.36E-01  | 0.87 (0.76-1.00) | 4.76E-02  | 0.07           | 70                    | 0.94 (0.79-1.11) | 2.44E-01      |  |
| rs8177834        | 150409989 | C/T       | 0.11 | 0.12    | O/O         | 1.23 (0.96-1.59)                  | 1.07E-01  | 0.84 (0.73-0.97) | 1.70E-02  | 0.01           | 85                    | 0.94 (0.78-1.11) | 2.45E-01      |  |
| rs72790113       | 150425910 | C/T       | 0.11 | 0.12    | I/I         | 1.23 (0.95-1.58)                  | 1.22E-01  | 0.84 (0.73-0.97) | 1.92E-02  | 0.01           | 84                    | 0.94 (0.78-1.12) | 2.45E-01      |  |
| rs8177458        | 150409667 | G/A       | 0.03 | 0.04    | O/O         | 0.77 (0.48-1.23)                  | 2.74E-01  | 0.92 (0.72-1.18) | 4.99E-01  | 0.52           | 0                     | 0.87 (0.64-1.19) | 2.49E-01      |  |
| rs870406         | 150400601 | G/A       | 0.12 | 0.13    | O/O         | 1.12 (0.88-1.44)                  | 3.53E-01  | 0.87 (0.76-1.00) | 5.19E-02  | 0.08           | 68                    | 0.94 (0.79-1.11) | 2.49E-01      |  |
| rs35655311       | 150478365 | C/T       | 0.04 | 0.04    | O/O         | 1.09 (0.73-1.63)                  | 6.66E-01  | 1.13 (0.90-1.42) | 2.76E-01  | 0.87           | 0                     | 1.12 (0.85-1.48) | 2.49E-01      |  |
| rs72790114       | 150426138 | G/C       | 0.11 | 0.12    | I/I         | 1.23 (0.95-1.59)                  | 1.16E-01  | 0.84 (0.73-0.97) | 1.92E-02  | 0.01           | 84                    | 0.94 (0.78-1.12) | 2.51E-01      |  |
| rs72790116       | 150426677 | G/C       | 0.11 | 0.12    | I/I         | 1.23 (0.95-1.59)                  | 1.16E-01  | 0.84 (0.73-0.97) | 1.98E-02  | 0.01           | 84                    | 0.94 (0.79-1.12) | 2.55E-01      |  |
| rs72790110       | 150420038 | G/A       | 0.11 | 0.12    | I/I         | 1.23 (0.95-1.59)                  | 1.10E-01  | 0.84 (0.73-0.97) | 1.91E-02  | 0.01           | 85                    | 0.94 (0.79-1.12) | 2.56E-01      |  |
| chr5:150466690:D | 150466690 | GC/G      | 0.06 | 0.06    | I/I         | 1.13 (0.78-1.63)                  | 5.30E-01  | 1.10 (0.90-1.33) | 3.46E-01  | 0.90           | 0                     | 1.11 (0.87-1.41) | 2.58E-01      |  |
| chr5:150413667:l | 150413667 | C/CT      | 0.11 | 0.12    | I/I         | 1.26 (0.98-1.63)                  | 7.62E-02  | 0.83 (0.72-0.96) | 1.45E-02  | 0.01           |                       |                  |               |  |

**Supplementary Table 12.** Association analysis in *TNIP1*

| SNP              | BP        | Alleles   |      | MAF     |             | Observed or Imputed in Dataset1/2 | Dataset 1 |                  | Dataset 2 |       | Test of heterogeneity |                  | Meta analysis |  |
|------------------|-----------|-----------|------|---------|-------------|-----------------------------------|-----------|------------------|-----------|-------|-----------------------|------------------|---------------|--|
|                  |           | maj / min | Case | Control | OR (95% CI) |                                   | P         | OR (95% CI)      | P         | $P_Q$ | $I^2$                 | OR (95% CI)      | P             |  |
|                  |           |           |      |         |             |                                   |           |                  |           |       |                       |                  |               |  |
| rs2233302        | 150415098 | C/G       | 0.11 | 0.12    | I/I         | 1.26 (0.98-1.63)                  | 7.57E-02  | 0.84 (0.72-0.97) | 1.50E-02  | 0.01  | 87                    | 0.94 (0.79-1.12) | 2.64E-01      |  |
| rs11738559       | 150476129 | C/T       | 0.17 | 0.18    | I/I         | 1.06 (0.86-1.30)                  | 6.09E-01  | 0.90 (0.80-1.02) | 1.03E-01  | 0.20  | 38                    | 0.94 (0.81-1.09) | 2.67E-01      |  |
| rs3763011        | 150404703 | G/A       | 0.20 | 0.20    | I/I         | 1.04 (0.85-1.27)                  | 7.09E-01  | 0.92 (0.82-1.02) | 1.26E-01  | 0.28  | 13                    | 0.95 (0.83-1.09) | 2.73E-01      |  |
| rs4958888        | 150472842 | G/A       | 0.25 | 0.26    | I/O         | 1.00 (0.83-1.21)                  | 9.75E-01  | 0.93 (0.84-1.04) | 1.96E-01  | 0.50  | 0                     | 0.95 (0.84-1.08) | 2.82E-01      |  |
| rs3763003        | 150467530 | C/T       | 0.39 | 0.39    | I/I         | 1.08 (0.92-1.28)                  | 3.36E-01  | 1.03 (0.94-1.13) | 5.07E-01  | 0.61  | 0                     | 1.05 (0.93-1.17) | 2.83E-01      |  |
| rs72790107       | 150412836 | C/T       | 0.11 | 0.12    | I/I         | 1.25 (0.97-1.62)                  | 8.49E-02  | 0.84 (0.73-0.97) | 1.89E-02  | 0.01  | 86                    | 0.94 (0.79-1.12) | 2.84E-01      |  |
| rs35191122       | 150465593 | G/C       | 0.04 | 0.04    | I/I         | 1.11 (0.75-1.66)                  | 6.00E-01  | 1.12 (0.88-1.41) | 3.52E-01  | 0.99  | 0                     | 1.12 (0.84-1.48) | 2.86E-01      |  |
| rs870407         | 150400587 | A/G       | 0.13 | 0.14    | I/I         | 1.08 (0.85-1.38)                  | 5.14E-01  | 0.89 (0.78-1.02) | 9.94E-02  | 0.17  | 46                    | 0.94 (0.80-1.11) | 2.92E-01      |  |
| rs3763012        | 150404657 | G/A       | 0.20 | 0.21    | O/I         | 1.06 (0.86-1.29)                  | 5.89E-01  | 0.91 (0.82-1.02) | 1.18E-01  | 0.22  | 34                    | 0.95 (0.83-1.09) | 3.00E-01      |  |
| rs17801328       | 150472328 | C/T       | 0.04 | 0.03    | I/I         | 0.82 (0.49-1.37)                  | 4.44E-01  | 1.23 (0.97-1.56) | 8.97E-02  | 0.16  | 50                    | 1.10 (0.80-1.51) | 3.02E-01      |  |
| rs1024995        | 150476004 | T/C       | 0.12 | 0.11    | O/O         | 1.20 (0.94-1.54)                  | 1.51E-01  | 1.02 (0.89-1.18) | 7.57E-01  | 0.28  | 16                    | 1.07 (0.90-1.27) | 3.05E-01      |  |
| rs3762997        | 150469552 | C/T       | 0.40 | 0.39    | I/I         | 1.09 (0.93-1.29)                  | 2.73E-01  | 1.02 (0.93-1.12) | 6.27E-01  | 0.48  | 0                     | 1.04 (0.93-1.17) | 3.19E-01      |  |
| rs76956521       | 150464641 | A/C       | 0.06 | 0.06    | I/I         | 1.14 (0.79-1.65)                  | 4.90E-01  | 1.08 (0.89-1.31) | 4.63E-01  | 0.79  | 0                     | 1.09 (0.86-1.40) | 3.23E-01      |  |
| chr5:150471727:1 | 150471727 | G/GT      | 0.45 | 0.44    | I/I         | 1.13 (0.96-1.33)                  | 1.34E-01  | 1.01 (0.92-1.11) | 8.39E-01  | 0.23  | 30                    | 1.04 (0.93-1.17) | 3.33E-01      |  |
| rs17586197       | 150468380 | A/G       | 0.04 | 0.04    | I/I         | 1.13 (0.75-1.68)                  | 5.59E-01  | 1.09 (0.87-1.38) | 4.54E-01  | 0.90  | 0                     | 1.10 (0.83-1.46) | 3.45E-01      |  |
| rs3792780        | 150466193 | A/C       | 0.40 | 0.39    | O/O         | 1.10 (0.93-1.29)                  | 2.58E-01  | 1.02 (0.93-1.12) | 6.90E-01  | 0.43  | 0                     | 1.04 (0.93-1.17) | 3.47E-01      |  |
| rs75851973       | 150464579 | A/G       | 0.06 | 0.06    | I/I         | 1.14 (0.79-1.65)                  | 4.90E-01  | 1.07 (0.88-1.30) | 4.99E-01  | 0.77  | 0                     | 1.09 (0.85-1.39) | 3.48E-01      |  |
| rs2233279        | 150467170 | T/C       | 0.40 | 0.39    | O/O         | 1.10 (0.94-1.30)                  | 2.41E-01  | 1.02 (0.93-1.12) | 7.09E-01  | 0.41  | 0                     | 1.04 (0.93-1.17) | 3.48E-01      |  |
| rs79984475       | 150473104 | A/C       | 0.25 | 0.26    | O/I         | 1.01 (0.84-1.21)                  | 9.31E-01  | 0.94 (0.85-1.04) | 2.46E-01  | 0.51  | 0                     | 0.96 (0.84-1.09) | 3.49E-01      |  |
| rs3792779        | 150466385 | A/C       | 0.40 | 0.39    | O/O         | 1.10 (0.93-1.29)                  | 2.57E-01  | 1.02 (0.93-1.12) | 7.06E-01  | 0.42  | 0                     | 1.04 (0.93-1.17) | 3.56E-01      |  |
| rs3763001        | 150467636 | G/A       | 0.40 | 0.39    | I/I         | 1.10 (0.94-1.30)                  | 2.45E-01  | 1.02 (0.93-1.12) | 7.21E-01  | 0.41  | 0                     | 1.04 (0.93-1.16) | 3.58E-01      |  |
| rs10067529       | 150469986 | C/T       | 0.45 | 0.45    | O/O         | 1.12 (0.96-1.32)                  | 1.51E-01  | 1.01 (0.92-1.10) | 8.68E-01  | 0.24  | 26                    | 1.04 (0.93-1.16) | 3.65E-01      |  |
| rs76837520       | 150467476 | G/A       | 0.40 | 0.39    | I/I         | 1.09 (0.93-1.29)                  | 2.92E-01  | 1.02 (0.93-1.12) | 6.85E-01  | 0.48  | 0                     | 1.04 (0.93-1.16) | 3.66E-01      |  |
| rs2233276        | 150467401 | G/A       | 0.04 | 0.04    | I/I         | 1.11 (0.74-1.66)                  | 6.05E-01  | 1.09 (0.86-1.38) | 4.61E-01  | 0.94  | 0                     | 1.10 (0.83-1.45) | 3.68E-01      |  |
| rs4958887        | 150472602 | A/G       | 0.46 | 0.45    | O/O         | 1.12 (0.96-1.32)                  | 1.52E-01  | 1.01 (0.92-1.10) | 8.90E-01  | 0.24  | 27                    | 1.04 (0.93-1.16) | 3.80E-01      |  |
| rs4958885        | 150470963 | A/G       | 0.45 | 0.44    | I/I         | 1.13 (0.97-1.33)                  | 1.23E-01  | 1.00 (0.91-1.10) | 9.53E-01  | 0.19  | 41                    | 1.04 (0.93-1.16) | 3.85E-01      |  |
| rs4958883        | 150465247 | G/A       | 0.45 | 0.45    | I/I         | 1.13 (0.96-1.33)                  | 1.36E-01  | 1.00 (0.92-1.10) | 9.40E-01  | 0.21  | 36                    | 1.04 (0.93-1.16) | 3.91E-01      |  |
| rs7711245        | 150470403 | A/G       | 0.45 | 0.45    | O/O         | 1.12 (0.96-1.32)                  | 1.51E-01  | 1.00 (0.92-1.10) | 9.30E-01  | 0.23  | 31                    | 1.04 (0.93-1.16) | 4.02E-01      |  |
| rs3762999        | 150469426 | C/T       | 0.45 | 0.45    | O/O         | 1.12 (0.96-1.32)                  | 1.52E-01  | 1.00 (0.92-1.10) | 9.35E-01  | 0.23  | 31                    | 1.04 (0.93-1.16) | 4.06E-01      |  |
| rs13159559       | 150464949 | C/G       | 0.04 | 0.04    | I/I         | 1.12 (0.75-1.67)                  | 5.94E-01  | 1.08 (0.85-1.37) | 5.20E-01  | 0.90  | 0                     | 1.09 (0.82-1.45) | 4.07E-01      |  |
| rs7711385        | 150470461 | C/T       | 0.45 | 0.45    | O/O         | 1.13 (0.96-1.32)                  | 1.43E-01  | 1.00 (0.91-1.10) | 9.62E-01  | 0.21  | 36                    | 1.04 (0.93-1.16) | 4.13E-01      |  |
| rs13188308       | 150471568 | T/C       | 0.45 | 0.45    | I/I         | 1.12 (0.96-1.32)                  | 1.51E-01  | 1.00 (0.91-1.10) | 9.54E-01  | 0.22  | 32                    | 1.04 (0.93-1.16) | 4.16E-01      |  |
| rs79563056       | 150435150 | C/G       | 0.03 | 0.03    | I/I         | 0.79 (0.45-1.36)                  | 3.91E-01  | 0.94 (0.72-1.25) | 6.86E-01  | 0.56  | 0                     | 0.90 (0.63-1.28) | 4.24E-01      |  |
| rs7711658        | 150470576 | C/G       | 0.45 | 0.45    | I/I         | 1.12 (0.96-1.32)                  | 1.49E-01  | 1.00 (0.91-1.10) | 9.70E-01  | 0.22  | 34                    | 1.04 (0.93-1.16) | 4.25E-01      |  |
| rs918499         | 150465555 | G/A       | 0.45 | 0.45    | I/I         | 1.13 (0.96-1.33)                  | 1.36E-01  | 1.00 (0.91-1.10) | 9.98E-01  | 0.20  | 40                    | 1.04 (0.93-1.16) | 4.29E-01      |  |
| rs7731894        | 150470747 | T/C       | 0.45 | 0.45    | O/I         | 1.12 (0.96-1.32)                  | 1.58E-01  | 1.00 (0.91-1.10) | 9.74E-01  | 0.23  | 31                    | 1.03 (0.93-1.16) | 4.37E-01      |  |
| chr5:150471732:1 | 150471732 | G/GC      | 0.45 | 0.45    | I/I         | 1.12 (0.95-1.31)                  | 1.85E-01  | 1.00 (0.91-1.10) | 9.48E-01  | 0.26  | 20                    | 1.03 (0.92-1.16) | 4.48E-01      |  |
| rs9968694        | 150470913 | C/T       | 0.30 | 0.30    | I/I         | 1.03 (0.87-1.23)                  | 7.11E-01  | 0.94 (0.85-1.04) | 2.61E-01  | 0.80  | 0                     | 0.97 (0.86-1.09) | 4.49E-01      |  |
| rs2161361        | 150464905 | T/C       | 0.45 | 0.45    | I/I         | 1.12 (0.96-1.32)                  | 1.57E-01  | 1.00 (0.91-1.10) | 9.91E-01  | 0.22  | 35                    | 1.03 (0.92-1.16) | 4.57E-01      |  |
| rs2161360        | 150464901 | C/G       | 0.45 | 0.45    | I/I         | 1.12 (0.96-1.32)                  | 1.57E-01  | 1.00 (0.91-1.10) | 9.88E-01  | 0.21  | 35                    | 1.03 (0.92-1.16) | 4.60E-01      |  |
| rs999557         | 150474080 | T/G       | 0.40 | 0.40    | O/O         | 1.08 (0.92-1.27)                  | 3.52E-01  | 1.01 (0.92-1.11) | 7.75E-01  | 0.51  | 0                     | 1.03 (0.92-1.15) | 4.62E-01      |  |
| rs7717069        | 150471698 | C/G       | 0.30 | 0.31    | I/I         | 1.03 (0.87-1.23)                  | 7.29E-01  | 0.95 (0.86-1.05) | 2.82E-01  | 0.40  | 0                     | 0.97 (0.86-1.09) | 4.67E-01      |  |
| rs4661           | 150408315 | C/T       | 0.06 | 0.06    | O/O         | 1.04 (0.72-1.50)                  | 8.39E-01  | 0.91 (0.75-1.10) | 3.36E-01  | 0.53  | 0                     | 0.94 (0.74-1.20) | 4.80E-01      |  |
| rs10056212       | 150471394 | A/G       | 0.45 | 0.45    | O/I         | 1.12 (0.95-1.32)                  | 1.64E-01  | 1.00 (0.91-1.09) | 9.57E-01  | 0.22  | 34                    | 1.03 (0.92-1.15) | 4.88E-01      |  |
| rs7706327        | 150469752 | A/C       | 0.45 | 0.45    | O/O         | 1.13 (0.96-1.32)                  | 1.39E-01  | 0.99 (0.91-1.09) | 9.12E-01  | 0.18  | 44                    | 1.03 (0.92-1.15) | 4.89E-01      |  |
| rs7734456        | 150427172 | G/C       | 0.42 | 0.43    | I/I         | 0.88 (0.75-1.04)                  | 1.26E-01  | 1.01 (0.92-1.11) | 8.77E-01  | 0.16  | 49                    | 0.97 (0.87-1.09) | 4.96E-01      |  |
| rs3763009        | 150412140 | G/A       | 0.35 | 0.35    | O/O         | 0.90 (0.76-1.06)                  | 2.12E-01  | 1.00 (0.91-1.10) | 1.00E+00  | 0.28  | 15                    | 0.97 (0.86-1.09) | 5.07E-01      |  |
| chr5:150462573:D | 150462573 | GGC/G     | 0.08 | 0.08    | I/I         | 0.98 (0.72-1.33)                  | 8.75E-01  | 0.94 (0.80-1.12) | 5.02E-01  | 0.85  | 0                     | 0.95 (0.77-1.17) | 5.15E-01      |  |
| rs3805434        | 150420339 | C/G       | 0.13 | 0.13    | I/I         | 0.83 (0.65-1.07)                  | 1.52E-01  | 1.01 (0.88-1.16) | 8.94E-01  | 0.19  | 43                    | 0.96 (0.81-1.13) | 5.18E-01      |  |
| rs3792781        | 150456869 | A/G       | 0.02 | 0.02    | I/I         | 1.36 (0.74-2.49)                  | 3.28E-01  | 1.02 (0.75-1.39) | 8.98E-01  | 0.42  | 0                     | 1.11 (0.74-1.64) | 5.30E-01      |  |
| rs7726776        | 150469888 | T/C       | 0.45 | 0.45    | I/I         | 1.12 (0.96-1.32)                  | 1.50E-01  | 0.99 (0.90-1.09) | 8.63E-01  | 0.18  | 44                    | 1.03 (0.92-1.15) | 5.36E-01      |  |
| rs13170017       | 150466790 | A/C       | 0.04 | 0.04    | O/I         | 1.07 (0.72-1.60)                  | 7.23E-01  | 1.06 (0.84-1.34) | 6.27E-01  | 0.95  | 0                     | 1.06 (0.80-1.41) | 5.49E-01      |  |
| rs78961323       | 150455661 | A/G       | 0.02 | 0.02    | I/I         | 1.35 (0.74-2.49)                  | 3.30E-01  | 1.01 (0.74-1.39) | 9.38E-01  | 0.41  | 0                     | 1.10 (0.74-1.63) | 5.59E-01      |  |
| rs56908687       | 150459138 | G/A       | 0.02 | 0.02    | I/I         | 1.44 (0.79-2.60)                  | 2.31E-01  | 0.99 (0.72-1.36) | 9.45E-01  | 0.28  | 16                    | 1.10 (0.74-1.63) | 5.64E-01      |  |
| rs56003867       | 150412900 | T/C       | 0.06 | 0.06    | I/I         | 1.04 (0.72-1.49)                  | 8.49E-01  | 0.93 (0.77-1.12) | 4.32E-01  | 0.60  | 0                     | 0.96 (0.75-1.22) | 5.73E-01      |  |
| rs73272866       | 150458064 | T/G       | 0.02 | 0.02    | I/I         | 1.35 (0.74-2.49)                  | 3.30E-01  | 1.00 (0.73-1.38) | 9.78E-01  | 0.40  | 0                     | 1.09 (0.73-1.63) | 5.88E-01      |  |
| rs3762996        | 150469626 | G/T       | 0.25 | 0.25    | O/O         | 0.99 (0.83-1.20)                  | 9.48E-01  | 0.97 (0.87-1.08) | 5.51E-01  | 0.81  | 0                     | 0.98 (0.86-1.11) | 5.90E-01      |  |
| rs79937737       | 150457479 | G/A       | 0.02 | 0.02    | I/I         | 1.36 (0.74-2.49)                  | 3.28E-01  | 1.00 (0.73-1.38) | 9.85E-01  | 0.39  | 0                     | 1.09 (0.73-1.63) | 5.93E-01      |  |
| rs73272850       | 150455571 | C/G       | 0.02 | 0.02    | I/I         | 1.36 (0.74-2.50)                  | 3.23E-01  | 1.00 (0.73-1.38) | 9.97E-01  | 0.38  | 0                     | 1.09 (0.73-1.63) | 5.97E-01      |  |
| rs1422674        | 150445609 | T/G       | 0.10 | 0.10    | O/I         | 0.95 (0.72-1.26)                  | 7.24E-01  | 0.97 (0.83-1.13) | 7.06E-01  | 0.90  | 0                     | 0.96 (0.80-1.17) | 6.12E-01      |  |
| rs79556964       | 150457256 | G/A       | 0.02 | 0.02    | I/I         | 1.36 (0.74-2.49)                  | 3.28E-01  | 1.00 (0.72-1.37) | 9.87E-01  | 0.38  | 0                     | 1.09 (0.73-1.62) | 6.14E-01      |  |
| rs73272847       | 150455492 | C/T       | 0.02 | 0.02    | I/I         | 1.31 (0.72-2.41)                  | 3.78E-01  | 1.01 (0.74-1.38) | 9.65E-01  | 0.45  | 0                     | 1.09 (0.73-1.61) | 6.14E-01      |  |
| rs3805435        | 150401296 | T/C       | 0.09 | 0.09    | O/O         | 0.83 (0.61-1.12)                  | 2.18E-01  | 1.02 (0.87-1.19) | 8.48E-01  | 0.24  | 28                    | 0.96 (0.78-1.17) | 6.23E-01      |  |
| rs3805430        | 150447690 | C/G       | 0.02 | 0.02    | I/I         | 1.37 (0.74-2.51)                  | 3.16E-01  | 0.98 (0.71-1.36) | 9.23E-01  | 0.35  | 0                     | 1.08 (0.72-1.61) | 6.52E-01      |  |
| rs13356414       | 150460244 | C/T       | 0.09 | 0.10    | I/I         | 1.00 (0.75-1.32)                  | 9.83E-01  | 0.96 (0.82-1.12) | 6.22E-01  | 0.83  | 0                     | 0.97 (0.80-1.18) | 6.68E-01      |  |
| rs3792798        | 150401765 | G/A       | 0.09 | 0.09    | I/O         | 0.83 (0.61-1.12)                  | 2.12E-01  | 1.02 (0.87-1.21) | 7.73E-01  | 0.22  | 34                    | 0.96 (0.79-1.18) | 6.74E-01      |  |
| rs73272871       | 150458301 | T/C       | 0.02 | 0.02    | I/I         | 1.35 (0.74-2.49)                  | 3.30E-01  | 0.98 (0.71-1.35) | 8.99E-01  | 0.36  | 0                     | 1.07 (0.72-1.61) | 6.82E-01      |  |
| rs77013900       | 150429129 | G/A       | 0.02 | 0.02    | I/I         | 0.85 (0.65-1.12)                  | 6.23E-01  | 0.98 (0.74-1.29) | 8.74E-01  | 0.70  | 0                     | 0.94 (0.64-1.38) | 6.93E-01      |  |
| rs59601429       | 150460354 | C/A       | 0.02 | 0.02    | I/I         | 1.58 (0.88-2.83)                  | 1.25E-01  | 0.92 (0.67-1.27) | 6.19E-01  | 0.11  | 60                    | 1.07 (0.72-1.59) | 6.94E-01      |  |
|                  |           |           |      |         |             |                                   |           |                  |           |       |                       |                  |               |  |

**Supplementary Table 12.** Association analysis in *TNIP1*

| SNP              | BP        | Alleles   |      | MAF     |             | Observed or Imputed in Dataset1/2 | Dataset 1 |                  | Dataset 2 |       |       | Test of heterogeneity |          | Meta analysis |  |
|------------------|-----------|-----------|------|---------|-------------|-----------------------------------|-----------|------------------|-----------|-------|-------|-----------------------|----------|---------------|--|
|                  |           | maj / min | Case | Control | OR (95% CI) |                                   | P         | OR (95% CI)      | P         | $P_Q$ | $I^2$ | OR (95% CI)           | P        |               |  |
|                  |           |           |      |         |             |                                   |           |                  |           |       |       |                       |          |               |  |
| rs2161362        | 150474388 | A/G       | 0.42 | 0.42    | O/O         | 1.04 (0.88-1.22)                  | 6.53E-01  | 1.01 (0.92-1.10) | 8.85E-01  | 0.75  | 0     | 1.02 (0.91-1.14)      | 7.18E-01 |               |  |
| rs2277940        | 150409477 | T/C       | 0.08 | 0.08    | O/O         | 0.91 (0.67-1.23)                  | 5.36E-01  | 1.00 (0.84-1.19) | 9.95E-01  | 0.59  | 0     | 0.97 (0.79-1.20)      | 7.38E-01 |               |  |
| rs6867766        | 150457699 | C/T       | 0.02 | 0.02    | I/I         | 1.40 (0.76-2.58)                  | 2.79E-01  | 0.95 (0.69-1.31) | 7.73E-01  | 0.27  | 16    | 1.06 (0.71-1.59)      | 7.41E-01 |               |  |
| rs3762998        | 150469551 | G/A       | 0.05 | 0.05    | O/O         | 1.13 (0.81-1.56)                  | 4.70E-01  | 0.92 (0.74-1.12) | 4.01E-01  | 0.29  | 11    | 0.97 (0.76-1.23)      | 7.43E-01 |               |  |
| rs57783314       | 150446428 | A/G       | 0.02 | 0.02    | I/I         | 1.36 (0.74-2.51)                  | 3.17E-01  | 0.96 (0.69-1.33) | 8.02E-01  | 0.32  | 0     | 1.06 (0.71-1.59)      | 7.49E-01 |               |  |
| rs4958437        | 150460768 | T/C       | 0.09 | 0.09    | I/I         | 0.95 (0.72-1.26)                  | 7.42E-01  | 0.99 (0.85-1.15) | 8.68E-01  | 0.83  | 0     | 0.98 (0.81-1.18)      | 7.52E-01 |               |  |
| chr5:150460088:D | 150460088 | GA/G      | 0.11 | 0.12    | I/I         | 1.04 (0.80-1.35)                  | 7.71E-01  | 0.96 (0.83-1.11) | 5.79E-01  | 0.60  | 0     | 0.98 (0.82-1.17)      | 7.53E-01 |               |  |
| rs8177437        | 150405387 | G/C       | 0.08 | 0.08    | I/I         | 0.88 (0.65-1.21)                  | 4.41E-01  | 1.01 (0.85-1.20) | 9.10E-01  | 0.46  | 0     | 0.97 (0.79-1.20)      | 7.54E-01 |               |  |
| rs869975         | 150406372 | G/A       | 0.08 | 0.08    | I/I         | 0.88 (0.65-1.21)                  | 4.41E-01  | 1.01 (0.85-1.20) | 9.06E-01  | 0.46  | 0     | 0.97 (0.79-1.20)      | 7.57E-01 |               |  |
| rs73272873       | 150458604 | G/A       | 0.02 | 0.02    | I/I         | 1.49 (0.82-2.70)                  | 1.91E-01  | 0.93 (0.67-1.28) | 6.45E-01  | 0.17  | 47    | 1.06 (0.71-1.58)      | 7.61E-01 |               |  |
| rs11548          | 150407783 | C/T       | 0.08 | 0.08    | O/O         | 0.90 (0.66-1.22)                  | 4.91E-01  | 1.01 (0.85-1.19) | 9.31E-01  | 0.52  | 0     | 0.98 (0.79-1.20)      | 7.70E-01 |               |  |
| rs3792795        | 150403802 | C/T       | 0.08 | 0.08    | O/O         | 0.89 (0.66-1.22)                  | 4.74E-01  | 1.01 (0.85-1.20) | 9.14E-01  | 0.50  | 0     | 0.97 (0.79-1.20)      | 7.73E-01 |               |  |
| rs12655899       | 150428157 | G/A       | 0.08 | 0.08    | I/I         | 0.90 (0.66-1.22)                  | 4.96E-01  | 1.01 (0.85-1.19) | 9.22E-01  | 0.52  | 0     | 0.98 (0.79-1.20)      | 7.81E-01 |               |  |
| rs28372811       | 150461285 | A/G       | 0.09 | 0.09    | I/I         | 0.96 (0.72-1.27)                  | 7.75E-01  | 0.99 (0.85-1.15) | 8.90E-01  | 0.85  | 0     | 0.98 (0.81-1.19)      | 7.88E-01 |               |  |
| rs76204372       | 150450001 | C/T       | 0.02 | 0.02    | I/I         | 1.35 (0.74-2.48)                  | 3.33E-01  | 0.95 (0.69-1.32) | 7.64E-01  | 0.32  | 0     | 1.05 (0.70-1.58)      | 7.95E-01 |               |  |
| rs10038339       | 150460320 | C/A       | 0.09 | 0.09    | I/I         | 0.97 (0.73-1.29)                  | 8.33E-01  | 0.99 (0.84-1.15) | 8.63E-01  | 0.92  | 0     | 0.98 (0.81-1.19)      | 7.96E-01 |               |  |
| rs8177438        | 150405405 | C/T       | 0.08 | 0.08    | I/I         | 0.88 (0.65-1.21)                  | 4.39E-01  | 1.02 (0.86-1.21) | 8.50E-01  | 0.44  | 0     | 0.98 (0.79-1.21)      | 8.02E-01 |               |  |
| rs17728260       | 150443005 | A/G       | 0.09 | 0.09    | O/O         | 0.90 (0.67-1.21)                  | 4.82E-01  | 1.01 (0.86-1.19) | 8.82E-01  | 0.49  | 0     | 0.98 (0.80-1.19)      | 8.04E-01 |               |  |
| rs8177429        | 150403098 | G/C       | 0.09 | 0.09    | I/I         | 0.85 (0.63-1.14)                  | 2.72E-01  | 1.04 (0.88-1.22) | 6.62E-01  | 0.24  | 28    | 0.98 (0.80-1.20)      | 8.31E-01 |               |  |
| rs76340441       | 150450365 | G/A       | 0.02 | 0.02    | I/I         | 1.35 (0.74-2.48)                  | 3.30E-01  | 0.94 (0.68-1.30) | 7.12E-01  | 0.30  | 6     | 1.04 (0.69-1.56)      | 8.38E-01 |               |  |
| rs113620860      | 150449404 | A/C       | 0.02 | 0.02    | I/I         | 1.32 (0.72-2.41)                  | 3.75E-01  | 0.95 (0.68-1.31) | 7.49E-01  | 0.35  | 0     | 1.04 (0.69-1.56)      | 8.41E-01 |               |  |
| rs78381597       | 150443945 | T/A       | 0.02 | 0.02    | I/I         | 1.36 (0.74-2.50)                  | 3.20E-01  | 0.94 (0.67-1.30) | 6.97E-01  | 0.29  | 11    | 1.04 (0.69-1.57)      | 8.43E-01 |               |  |
| rs10063243       | 150458826 | T/A       | 0.02 | 0.02    | I/I         | 1.49 (0.82-2.70)                  | 1.91E-01  | 0.90 (0.65-1.25) | 5.35E-01  | 0.15  | 52    | 1.04 (0.69-1.55)      | 8.66E-01 |               |  |
| rs62382335       | 150425032 | T/A       | 0.08 | 0.08    | I/I         | 0.91 (0.67-1.24)                  | 5.45E-01  | 1.02 (0.86-1.20) | 8.56E-01  | 0.54  | 0     | 0.98 (0.80-1.21)      | 8.67E-01 |               |  |
| rs76523847       | 150454184 | A/G       | 0.02 | 0.02    | I/I         | 1.32 (0.72-2.43)                  | 3.66E-01  | 0.94 (0.68-1.30) | 6.99E-01  | 0.33  | 0     | 1.03 (0.69-1.55)      | 8.78E-01 |               |  |
| rs60454275       | 150436073 | G/A       | 0.02 | 0.02    | I/I         | 1.32 (0.72-2.43)                  | 3.64E-01  | 0.94 (0.67-1.30) | 6.96E-01  | 0.32  | 0     | 1.03 (0.69-1.56)      | 8.79E-01 |               |  |
| rs3805432        | 150439504 | C/T       | 0.02 | 0.02    | I/I         | 1.40 (0.76-2.59)                  | 2.76E-01  | 0.91 (0.65-1.28) | 6.06E-01  | 0.23  | 31    | 1.03 (0.68-1.56)      | 8.88E-01 |               |  |
| rs3792792        | 150440506 | T/C       | 0.02 | 0.02    | I/I         | 1.36 (0.74-2.50)                  | 3.20E-01  | 0.92 (0.66-1.28) | 6.31E-01  | 0.27  | 18    | 1.03 (0.68-1.55)      | 9.03E-01 |               |  |
| rs2233289        | 150436517 | G/A       | 0.01 | 0.01    | O/O         | 1.24 (0.57-2.69)                  | 5.93E-01  | 0.96 (0.62-1.49) | 8.46E-01  | 0.57  | 0     | 1.03 (0.60-1.76)      | 9.04E-01 |               |  |
| rs60602178       | 150413528 | A/G       | 0.08 | 0.08    | I/I         | 0.92 (0.68-1.25)                  | 5.99E-01  | 1.04 (0.88-1.23) | 6.57E-01  | 0.50  | 0     | 1.00 (0.82-1.23)      | 9.23E-01 |               |  |
| rs56661379       | 150419962 | T/C       | 0.08 | 0.08    | I/I         | 0.90 (0.66-1.23)                  | 5.09E-01  | 1.04 (0.88-1.24) | 6.10E-01  | 0.41  | 0     | 1.00 (0.81-1.23)      | 9.35E-01 |               |  |
| rs1862363        | 150448145 | G/A       | 0.02 | 0.02    | I/I         | 1.32 (0.72-2.43)                  | 3.65E-01  | 0.92 (0.66-1.28) | 6.34E-01  | 0.31  | 5     | 1.02 (0.68-1.54)      | 9.38E-01 |               |  |
| rs11747389       | 150472036 | G/C       | 0.05 | 0.05    | I/I         | 1.18 (0.85-1.64)                  | 3.15E-01  | 0.94 (0.77-1.16) | 5.75E-01  | 0.25  | 24    | 1.00 (0.79-1.28)      | 9.53E-01 |               |  |
| rs141907998      | 150419467 | C/T       | 0.02 | 0.02    | I/I         | 1.00 (0.53-1.89)                  | 1.00E+00  | 0.99 (0.73-1.34) | 9.58E-01  | 0.98  | 0     | 0.99 (0.67-1.48)      | 9.64E-01 |               |  |
| rs3805431        | 150439539 | G/A       | 0.08 | 0.08    | I/I         | 0.91 (0.66-1.24)                  | 5.43E-01  | 1.04 (0.88-1.23) | 6.70E-01  | 0.46  | 0     | 1.00 (0.81-1.23)      | 9.70E-01 |               |  |
| rs3792794        | 150434722 | C/T       | 0.08 | 0.08    | O/O         | 0.90 (0.65-1.23)                  | 4.93E-01  | 1.04 (0.88-1.24) | 6.39E-01  | 0.41  | 0     | 1.00 (0.81-1.23)      | 9.74E-01 |               |  |
| rs6870205        | 150453011 | G/A       | 0.02 | 0.02    | I/I         | 1.28 (0.70-2.34)                  | 4.29E-01  | 0.92 (0.66-1.27) | 6.00E-01  | 0.34  | 0     | 1.01 (0.67-1.50)      | 9.81E-01 |               |  |
| rs4958438        | 150461069 | A/G       | 0.10 | 0.10    | O/O         | 0.94 (0.71-1.24)                  | 6.61E-01  | 1.02 (0.88-1.19) | 7.65E-01  | 0.60  | 0     | 1.00 (0.83-1.20)      | 9.84E-01 |               |  |
| rs8177449        | 150407939 | C/T       | 0.07 | 0.07    | I/I         | 1.04 (0.75-1.43)                  | 8.17E-01  | 0.99 (0.82-1.19) | 8.90E-01  | 0.79  | 0     | 1.00 (0.80-1.25)      | 9.96E-01 |               |  |
| rs62382333       | 150418959 | T/C       | 0.08 | 0.08    | I/I         | 0.91 (0.67-1.24)                  | 5.41E-01  | 1.03 (0.87-1.22) | 7.05E-01  | 0.47  | 0     | 1.00 (0.81-1.23)      | 9.97E-01 |               |  |

**Supplementary Table 13: Suggestive regions from analysis using Dataset 4.**

| Gene symbol         | Chr | SNP            | BP (hg19)              | Observed or imputed | Alleles              | MAF <sup>b</sup> |         | OR (95% CI)      | P        |
|---------------------|-----|----------------|------------------------|---------------------|----------------------|------------------|---------|------------------|----------|
|                     |     |                |                        |                     | maj/min <sup>a</sup> | Case             | Control |                  |          |
| <i>CPEB4</i>        | 5   | rs359457       | 173279842              | O                   | T/C                  | 0.40             | 0.45    | 0.79 (0.72-0.87) | 8.96E-07 |
| <i>RASGRP3</i>      | 2   | rs13425999     | 33702203               | O                   | C/T                  | 0.05             | 0.08    | 0.64 (0.53-0.77) | 3.44E-06 |
| <i>VCAM1</i>        | 1   | chr1:100993403 | 100993403 <sup>c</sup> | O                   | A/G                  | 0.06             | 0.04    | 1.68 (1.35-2.09) | 4.29E-06 |
| <i>SATB1</i>        | 3   | rs11915281     | 18662988               | I                   | C/T                  | 0.03             | 0.02    | 2.09 (1.52-2.87) | 5.03E-06 |
| <i>ATXN2</i>        | 12  | rs4766578      | 111904371              | I                   | A/T                  | 0.53             | 0.48    | 1.23 (1.12-1.35) | 7.58E-06 |
| 2q31.1              | 2   | rs1554770      | 177479463              | O                   | A/G                  | 0.40             | 0.45    | 0.81 (0.74-0.89) | 8.43E-06 |
| <i>MIR1208</i>      | 8   | rs759651       | 129164288              | O                   | T/C                  | 0.24             | 0.20    | 1.28 (1.15-1.43) | 1.22E-05 |
| <i>C1orf53</i>      | 1   | rs61829103     | 197862946              | O                   | A/G                  | 0.05             | 0.07    | 0.64 (0.52-0.78) | 1.24E-05 |
| <i>PRDM7</i>        | 16  | rs4785621      | 88658236               | O                   | G/A                  | 0.09             | 0.12    | 0.71 (0.61-0.83) | 1.45E-05 |
| <i>TMCO4</i>        | 1   | rs6699160      | 20025383               | O                   | T/C                  | 0.17             | 0.13    | 1.33 (1.17-1.51) | 1.70E-05 |
| <i>TP53TG1</i>      | 7   | rs11762311     | 86780761               | O                   | G/A                  | 0.07             | 0.05    | 1.53 (1.26-1.85) | 1.71E-05 |
| <i>RNLS</i>         | 10  | rs558443       | 90013195               | I                   | A/C                  | 0.21             | 0.25    | 0.78 (0.70-0.87) | 1.83E-05 |
| <i>IRF8</i>         | 16  | rs11117431     | 86015316               | O                   | A/G                  | 0.17             | 0.22    | 0.77 (0.69-0.87) | 1.86E-05 |
| <i>CCR3</i>         | 3   | rs79539493     | 46302938               | I                   | G/A                  | 0.12             | 0.15    | 0.74 (0.64-0.85) | 1.88E-05 |
| <i>TPD52L2</i>      | 20  | rs12624434     | 62482223               | I                   | G/A                  | 0.05             | 0.08    | 0.65 (0.54-0.79) | 2.05E-05 |
| <i>IL12RB2</i>      | 1   | rs6672745      | 67788565               | O                   | C/T                  | 0.14             | 0.11    | 1.35 (1.18-1.56) | 2.50E-05 |
| <i>SNX13</i>        | 7   | rs6973480      | 17944654               | O                   | A/G                  | 0.50             | 0.46    | 1.21 (1.11-1.33) | 3.73E-05 |
| <i>ABHD6</i>        | 3   | rs200129705    | 58225966               | I                   | T/TA                 | 0.27             | 0.32    | 0.81 (0.73-0.90) | 3.87E-05 |
| <i>IL15RA-IL2RA</i> | 10  | rs1323651      | 6033301                | O                   | C/A                  | 0.41             | 0.36    | 1.22 (1.11-1.34) | 4.44E-05 |
| <i>DOCK1-NPS</i>    | 10  | rs10830107     | 129194065              | O                   | A/G                  | 0.21             | 0.17    | 1.28 (1.14-1.44) | 4.70E-05 |
| <i>UBE2E3</i>       | 2   | rs6734603      | 182038729              | O                   | C/T                  | 0.27             | 0.23    | 1.25 (1.12-1.39) | 4.93E-05 |

- a. Major allele and minor allele;
- b. The minor allele frequency (MAF).
- c. This base pair position is shown in hg18.

**Supplementary Table 14: Multiple logistic regression model of genome-wide and suggestive association SNPs to Sjögren's syndrome risk.**

| SNP                                | Gene            | Minor Allele | OR(95%CI)       | P       |
|------------------------------------|-----------------|--------------|-----------------|---------|
| rs6658353                          | <i>FCGR2A</i>   | G            | 0.85(0.77-0.94) | 8.7E-04 |
| rs10553577                         | <i>STAT4</i>    | T            | 1.40(1.26-1.56) | 5.3E-10 |
| rs485497                           | <i>IL12A</i>    | A            | 1.27(1.15-1.40) | 9.1E-07 |
| rs3733346                          | <i>DGKQ</i>     | C            | 1.23(1.12-1.35) | 2.3E-05 |
| rs6579837                          | <i>TNFAIP3</i>  | T            | 1.42(1.22-1.65) | 5.6E-06 |
| rs2431098                          | <i>PTTG1</i>    | A            | 0.78(0.71-0.86) | 2.9E-07 |
| rs116232857                        | <i>HLA-DQA1</i> | G            | 1.98(1.77-2.20) | 1.3E-34 |
| rs115575857                        | <i>HLA-DQB1</i> | G            | 2.34(2.04-2.68) | 1.7E-34 |
| rs526531                           | <i>PRDM1</i>    | A            | 1.23(1.11-1.36) | 6.9E-05 |
| rs6933404                          | <i>TNFAIP3</i>  | C            | 1.29(1.15-1.44) | 7.1E-06 |
| rs3757387                          | <i>IRF5</i>     | C            | 1.41(1.22-1.64) | 4.0E-06 |
| rs10954213                         | <i>IRF5</i>     | G            | 1.18(1.02-1.37) | 2.4E-02 |
| rs17339836                         | <i>IRF5</i>     | T            | 1.47(1.28-1.70) | 6.3E-08 |
| rs2736345                          | <i>BLK</i>      | G            | 1.33(1.20-1.47) | 2.9E-08 |
| rs7119038                          | <i>CXCR5</i>    | G            | 0.75(0.67-0.85) | 3.0E-06 |
| C statistic (area under ROC curve) |                 |              |                 | 0.811   |



**Supplementary Table 15:** Table of odds ratios (ORs) with the 95% confidence intervals for significantly associated loci outside the HLA in Sjögren's syndrome and various autoimmune disorders. The PubMed ID (PMID) for the reference from which data for each variant was is provided; Sjögren's syndrome data is obtained from this study. Abbreviations: Sjögren's syndrome (SS); celiac disease (CeID); primary biliary cirrhosis (PBC); rheumatoid arthritis (RA); ulcerative colitis (UC); systemic lupus erythematosus (SLE); systemic sclerosis (SSc).

| Row in Figure | Locus        | Phenotype | SNP        | Location  | OR   | 95% CI    | P value  | PMID     |
|---------------|--------------|-----------|------------|-----------|------|-----------|----------|----------|
| 01            | <i>CXCR5</i> | PBC       | rs6421571  | 11q23     | 0.73 | 0.67-0.80 | 3.00E-12 | 21399635 |
| 02            | <i>CXCR5</i> | SS        | rs6421571  | 11q23     | 0.76 | 0.65-0.88 | 2.08E-07 | -        |
| 03            | <i>BLK</i>   | SSc       | rs2736340  | 8p21.3    | 1.27 | 1.10-1.40 | 6.80E-05 | 19796918 |
| 04            | <i>BLK</i>   | SLE       | rs13277113 | 8p21.3    | 1.39 | 1.28-1.51 | 1.00E-10 | 18204098 |
| 05            | <i>BLK</i>   | RA        | rs2736340  | 8p21.3    | 1.19 | 1.13-1.27 | 5.69E-09 | 19503088 |
| 06            | <i>BLK</i>   | SS        | rs2736345  | 8p21.3    | 1.30 | 1.16-1.46 | 1.17E-10 | -        |
| 07            | <i>IRF5</i>  | SSc       | rs4728142  | 7q32      | 1.22 | 1.14-1.29 | 4.74E-10 | 22407130 |
| 08            | <i>IRF5</i>  | UC        | rs4728142  | 7q32      | 1.07 | 1.03-1.11 | 2.00E-08 | 21297633 |
| 09            | <i>IRF5</i>  | PBC       | rs12531711 | 7q32      | 1.58 | 1.41-1.76 | 8.90E-17 | 21399635 |
| 10            | <i>IRF5</i>  | SLE       | rs3807307  | 7q32      | 1.59 | 1.33-1.89 | 2.20E-07 | 18063667 |
| 11            | <i>IRF5</i>  | RA        | rs752637   | 7q32      | 0.86 | 0.79-0.93 | 3.03E-05 | 23073787 |
| 12            | <i>IRF5</i>  | SS        | rs3757387  | 7q32      | 1.44 | 1.29-1.62 | 2.73E-19 | -        |
| 13            | <i>TNIP1</i> | SLE       | rs6579837  | 5q32      | 1.28 | 1.16-1.42 | 2.45E-05 | 22833143 |
| 14            | <i>TNIP1</i> | SS        | rs6579837  | 5q32      | 1.43 | 1.20-1.71 | 3.30E-08 | -        |
| 15            | <i>IL12A</i> | CeID      | rs17810546 | 3q25.33   | 1.36 | 1.29-1.44 | 4.00E-28 | 20190752 |
| 16            | <i>IL12A</i> | CeID      | rs17810546 | 3q25-3q26 | 1.35 | 1.23-1.49 | 1.07E-09 | 18311140 |
| 17            | <i>IL12A</i> | PBC       | rs9877910  | 3q25      | 1.47 | 1.34-1.60 | 1.02E-17 | 22936693 |
| 18            | <i>IL12A</i> | SS        | rs485497   | 3q25      | 1.30 | 1.16-1.46 | 1.17E-10 | -        |
| 19            | <i>STAT4</i> | SSc       | rs3821236  | 2q32      | 1.30 | 1.19-1.41 | 3.93E-09 | 20383147 |
| 20            | <i>STAT4</i> | PBC       | rs10931468 | 2q32      | 1.50 | 1.37-1.64 | 2.35E-19 | 21399635 |
| 21            | <i>STAT4</i> | SLE       | rs7574865  | 2q32      | 1.55 | 1.34-1.79 | 1.87E-09 | 17804842 |
| 22            | <i>STAT4</i> | RA        | rs7574865  | 2q32      | 1.27 | 1.16-1.36 | 4.64E-08 | 17804842 |
| 23            | <i>STAT4</i> | SS        | rs10553577 | 2q32      | 1.43 | 1.26-1.62 | 6.80E-15 | -        |

**Supplementary Table 16:** Table of odds ratios (ORs) with the 95% confidence intervals for significantly associated loci within the HLA in Sjögren’s syndrome and various autoimmune disorders. The PMID for the reference from which data for each variant was is provided; Sjögren’s syndrome data is obtained from this study. Abbreviations: Sjögren’s syndrome (SS); multiple sclerosis (MS); celiac disease (CeID); psoriasis (Psor); primary biliary cirrhosis (PBC); rheumatoid arthritis (RA); systemic lupus erythematosus (SLE); systemic sclerosis (SSc); type 1 diabetes (T1D).

| Row in Figure | Locus                      | Phenotype | SNP         | Location | OR   | 95% CI    | P value   | PMID     |
|---------------|----------------------------|-----------|-------------|----------|------|-----------|-----------|----------|
| 01            | <i>WASF5P - HLA-B</i>      | Psor      | rs10484554  | 6p21.33  | 4.66 | 4.23-5.13 | 4.00E-214 | 20953190 |
| 02            | <i>MSH5</i>                | SLE       | rs3131379   | 6p21.33  | 2.36 | 2.11-2.64 | 2.00E-52  | 18204446 |
| 03            | <i>C6orf10</i>             | RA        | rs6910071   | 6p21.32  | 2.88 | 2.73-3.03 | 1.00E-299 | 20453842 |
| 04            | <i>C6orf10</i>             | MS        | rs3129934   | 6p21.32  | 3.30 | 2.30-4.90 | 9.00E-11  | 18941528 |
| 05            | <i>HLA-DRA</i>             | MS        | rs3135388   | 6p21.32  | 2.75 | 2.46-3.07 | 4.00E-225 | 19525953 |
| 06            | <i>HLA-DQA1</i>            | SS        | rs116232857 | 6p21.32  | 2.53 | 2.24-2.86 | 1.33E-96  | -        |
| 07            | <i>HLA-DQA1</i>            | T1D       | rs9272346   | 6p21.32  | 5.49 | 4.83-6.24 | 5.00E-134 | 17554300 |
| 08            | <i>HLA-DQA1</i>            | CeID      | rs2187668   | 6p21.32  | 6.23 | 5.95-6.52 | 1.00E-50  | 20190752 |
| 09            | <i>HLA-DQA2</i>            | PBC       | rs7774434   | 6p21.32  | 1.60 | 1.48-1.73 | 4.00E-34  | 21399635 |
| 10            | <i>HLA-DQB1 - HLA-DQA2</i> | RA        | rs6457620   | 6p21.32  | 2.55 | 2.40-2.71 | 4.00E-186 | 18794853 |
| 11            | <i>HLA-DQB1</i>            | SS        | rs115575857 | 6p21.32  | 3.53 | 3.03-4.11 | 7.65E-114 | -        |
| 12            | <i>HLA-DQB1 - HLA-DQA2</i> | T1D       | rs2647044   | 6p21.32  | 8.30 | 6.97-9.89 | 1.00E-16  | 17632545 |
| 13            | <i>HLA-DQB1 - HLA-DQA2</i> | SSc       | rs9275390   | 6p21.32  | 2.38 | 2.13-2.67 | 3.00E-54  | 21779181 |
